# Supplementary material for: Impact of Different Treatment Methods and Timings on Soil Microbial Communities with Transgenic Maize Straw Return
Source: Research Square preprint supplement (doi:10.21203/rs.3.rs-5612017/v1), 2025-04-10
Supplement: Supplementary file 1 [file 352ee5ac045abaf931ad93ba.xlsx]

## Sheet: species_M_D_NG
Species	log2FoldChange	pValue	Group
Zancudomyces_culisetae	-4.81243	0.0456384	Mulching/DeepPlowing_N
Acremonium_chrysogenum	4.77371	0.00208559	Mulching/DeepPlowing_N
Orrella_sp._NBD-18	4.20612	0.0106301	Mulching/DeepPlowing_G
Geosmithia_morbida	3.98921	0.00202357	Mulching/DeepPlowing_N
Stachybotrys_chartarum	3.81817	0.00144513	Mulching/DeepPlowing_N
Coniochaeta_sp._2T2.1	3.75328	0.0187059	Mulching/DeepPlowing_G
Phialemoniopsis_curvata	3.68449	0.0217173	Mulching/DeepPlowing_G
Neonectria_ditissima	3.64042	0.023186	Mulching/DeepPlowing_G
Geosmithia_morbida	3.63726	0.0124754	Mulching/DeepPlowing_G
Tolypocladium_ophioglossoides	3.6274	0.00737315	Mulching/DeepPlowing_N
Tolypocladium_paradoxum	3.6112	0.00675701	Mulching/DeepPlowing_N
Stachybotrys_chartarum	3.60043	0.0117852	Mulching/DeepPlowing_G
Stachybotrys_chlorohalonata	3.58039	0.00997506	Mulching/DeepPlowing_N
Purpureocillium_lilacinum	3.53442	0.00828291	Mulching/DeepPlowing_G
Tolypocladium_paradoxum	3.51092	0.0226176	Mulching/DeepPlowing_G
Aquabacterium_parvum	3.41918	0.0117175	Mulching/DeepPlowing_G
Purpureocillium_lilacinum	3.37721	0.0412294	Mulching/DeepPlowing_N
Thermothielavioides_terrestris	3.35849	0.0314917	Mulching/DeepPlowing_N
Limnohabitans_sp._2KL-1	3.31307	0.0128993	Mulching/DeepPlowing_G
Comamonadaceae_bacterium_PBBC1	3.30979	0.00264198	Mulching/DeepPlowing_G
Tolypocladium_ophioglossoides	3.293	0.0211678	Mulching/DeepPlowing_G
Fusarium_decemcellulare	3.27675	0.000235349	Mulching/DeepPlowing_G
Stachybotrys_chlorohalonata	3.23577	0.00196914	Mulching/DeepPlowing_G
Fusarium_zealandicum	3.12174	0.0114396	Mulching/DeepPlowing_N
Fusarium_oxysporum	3.06676	0.0402226	Mulching/DeepPlowing_N
Coniochaeta_ligniaria	3.06263	0.0244013	Mulching/DeepPlowing_N
Aquabacterium_sp.	3.03043	0.0402226	Mulching/DeepPlowing_G
Coniochaeta_sp._2T2.1	3.02965	0.0289585	Mulching/DeepPlowing_N
Streptomyces_azureus	3.01335	0.0479807	Mulching/DeepPlowing_N
Stenotrophomonas_phage_vB_SmaS-DLP_6	2.997	0.0477078	Mulching/DeepPlowing_G
Fusarium_oxysporum	2.92469	0.00416163	Mulching/DeepPlowing_G
Pochonia_chlamydosporia	2.89523	0.00338587	Mulching/DeepPlowing_G
Microbacterium_oryzae	2.89295	0.0103361	Mulching/DeepPlowing_N
Streptomyces_coeruleorubidus	2.89012	0.0227191	Mulching/DeepPlowing_N
Fusarium_albosuccineum	2.88908	0.00135287	Mulching/DeepPlowing_G
Podospora_comata	2.87341	0.0435428	Mulching/DeepPlowing_N
Neurospora_tetrasperma	2.84534	0.037114	Mulching/DeepPlowing_N
Aspergillus_novofumigatus	2.81389	0.0265981	Mulching/DeepPlowing_N
Vampirovibrio_chlorellavorus	2.802	0.034207	Mulching/DeepPlowing_G
Metarhizium_robertsii	2.75136	0.00264606	Mulching/DeepPlowing_N
Pochonia_chlamydosporia	2.73974	0.0129817	Mulching/DeepPlowing_N
Fusarium_sarcochroum	2.7334	0.0376451	Mulching/DeepPlowing_N
Nonomuraea_coxensis	2.72667	0.0314917	Mulching/DeepPlowing_G
Fusarium_vanettenii	2.71498	0.04506	Mulching/DeepPlowing_N
Antribacter_gilvus	2.71139	0.034207	Mulching/DeepPlowing_N
Colletotrichum_incanum	2.69942	0.0168792	Mulching/DeepPlowing_N
Fusarium_sp._AF-8	2.68987	0.0270451	Mulching/DeepPlowing_N
Fusarium_vanettenii	2.68768	0.0188559	Mulching/DeepPlowing_G
Metarhizium_anisopliae	2.66442	0.000462113	Mulching/DeepPlowing_G
Colletotrichum_truncatum	2.66351	0.00180593	Mulching/DeepPlowing_G
Trichoderma_harzianum	2.64071	0.0215059	Mulching/DeepPlowing_N
Tolypocladium_capitatum	2.60307	0.00372678	Mulching/DeepPlowing_G
Metarhizium_guizhouense	2.58782	0.0144263	Mulching/DeepPlowing_N
Streptomyces_sp._EN16	2.57751	0.00619187	Mulching/DeepPlowing_N
Trichoderma_arundinaceum	2.55859	0.0305297	Mulching/DeepPlowing_N
Clonostachys_rosea	2.53583	0.019889	Mulching/DeepPlowing_N
Bradyrhizobium_genosp._SA-3	2.53254	0.0244013	Mulching/DeepPlowing_G
Gaeumannomyces_tritici	2.52011	0.0211678	Mulching/DeepPlowing_G
Trichoderma_gamsii	2.5177	0.0321405	Mulching/DeepPlowing_N
Fusarium_euwallaceae	2.50893	0.0130919	Mulching/DeepPlowing_N
Metarhizium_acridum	2.49071	0.0187991	Mulching/DeepPlowing_N
Fusarium_sp._AF-8	2.47286	0.0156142	Mulching/DeepPlowing_G
Hirsutella_minnesotensis	2.45032	0.023186	Mulching/DeepPlowing_N
Cordyceps_sp._RAO-2017	2.44022	0.0375883	Mulching/DeepPlowing_N
Agrobacterium_sp._MS2	2.42893	0.0456596	Mulching/DeepPlowing_G
Trichoderma_harzianum	2.40909	0.000966234	Mulching/DeepPlowing_G
Metarhizium_rileyi	2.39849	0.0313745	Mulching/DeepPlowing_N
Monosporascus_sp._GIB2	2.39597	0.023186	Mulching/DeepPlowing_N
Promicromonospora_citrea	2.37557	0.0289585	Mulching/DeepPlowing_N
Streptomyces_gancidicus	2.36945	0.0257033	Mulching/DeepPlowing_N
Colletotrichum_truncatum	2.36766	0.0326667	Mulching/DeepPlowing_N
Streptomyces_phage_Muntaha	2.35518	0.0381851	Mulching/DeepPlowing_G
Streptomyces_phage_Circinus	2.3365	0.0253805	Mulching/DeepPlowing_G
Streptomyces_swartbergensis	2.31807	0.0155727	Mulching/DeepPlowing_N
Fusarium_austroafricanum	2.31007	0.034048	Mulching/DeepPlowing_N
Streptomyces_argenteolus	2.29697	0.046222	Mulching/DeepPlowing_N
Chaetomium_thermophilum	2.2909	0.0244013	Mulching/DeepPlowing_N
Streptomyces_phage_Gilson	2.2846	0.0175256	Mulching/DeepPlowing_G
Colletotrichum_plurivorum	2.27944	0.00710615	Mulching/DeepPlowing_N
Ophiocordyceps_sinensis	2.27583	0.0037232	Mulching/DeepPlowing_N
Streptomyces_leeuwenhoekii	2.27264	0.0183443	Mulching/DeepPlowing_N
Nocardioides_panzhihuensis	2.26965	0.037114	Mulching/DeepPlowing_N
Fusarium_sp._NRRL_66182	2.26396	0.018693	Mulching/DeepPlowing_G
Trichoderma_reesei	2.2604	0.0204195	Mulching/DeepPlowing_N
Metarhizium_robertsii	2.25916	0.006609	Mulching/DeepPlowing_G
Monosporascus_sp._MG133	2.25823	0.00997506	Mulching/DeepPlowing_G
Lomentospora_prolificans	2.23454	0.0323199	Mulching/DeepPlowing_G
Acremonium_fuci	2.22655	0.00816355	Mulching/DeepPlowing_N
Fusarium_euwallaceae	2.22228	0.0360215	Mulching/DeepPlowing_G
Streptomyces_sp._Z38	2.21536	0.0353341	Mulching/DeepPlowing_N
Roseovarius_sp._THAF9	2.19989	0.0273407	Mulching/DeepPlowing_G
Ustilaginoidea_virens	2.19492	0.0206048	Mulching/DeepPlowing_N
Fluviicola_sp._RIFCSPHIGHO2_12_FULL_43_24	2.19185	0.0402226	Mulching/DeepPlowing_G
Acidomyces_sp._richmondensis	2.18849	0.037114	Mulching/DeepPlowing_N
Streptomyces_phage_RosaAsantewaa	2.18182	0.00264198	Mulching/DeepPlowing_G
Diaporthe_ampelina	2.18003	0.042259	Mulching/DeepPlowing_G
Streptomyces_violaceorubidus	2.16858	0.0115902	Mulching/DeepPlowing_N
Streptomyces_glaucescens	2.16375	0.0182693	Mulching/DeepPlowing_N
Rhizobium_sp._Root491	2.15818	0.0151354	Mulching/DeepPlowing_N
Porphyrobacter_tepidarius	2.15685	0.0141821	Mulching/DeepPlowing_G
Verticillium_longisporum	2.14741	0.0289095	Mulching/DeepPlowing_G
Aspergillus_awamori	2.14513	0.0275348	Mulching/DeepPlowing_N
Colletotrichum_higginsianum	2.13435	0.00255951	Mulching/DeepPlowing_N
Streptomyces_sp._LamerLS-316	2.10167	0.0412294	Mulching/DeepPlowing_N
Sphaerotilus_hippei	2.07868	0.00640223	Mulching/DeepPlowing_G
Metarhizium_guizhouense	2.06767	0.0288162	Mulching/DeepPlowing_G
Trichoderma_asperellum	2.06684	0.0417599	Mulching/DeepPlowing_N
Rhizobium_sp._MTP-10005	2.06568	0.0332469	Mulching/DeepPlowing_G
Fusarium_beomiforme	2.06314	0.0157652	Mulching/DeepPlowing_G
Arthrobacter_phage_Mimi	2.06146	0.00650661	Mulching/DeepPlowing_G
Streptomyces_phage_LibertyBell	2.05918	0.0249177	Mulching/DeepPlowing_G
Colletotrichum_higginsianum	2.05256	0.0115706	Mulching/DeepPlowing_G
Chitinophaga_sp._S165	2.05201	0.037114	Mulching/DeepPlowing_N
Pestalotiopsis_fici	2.05143	0.0187059	Mulching/DeepPlowing_N
Fusarium_ambrosium	2.03843	0.00784311	Mulching/DeepPlowing_N
Fusarium_sp._AF-4	2.03297	0.0253732	Mulching/DeepPlowing_N
Fusarium_heterosporum	2.01937	0.00337637	Mulching/DeepPlowing_G
Streptomyces_sp._FxanaA7	2.00448	0.0108478	Mulching/DeepPlowing_N
Omnitrophica_WOR_2_bacterium_RIFCSPHIGHO2_02_FULL_48_11	-2.0036	0.0213037	Mulching/DeepPlowing_G
Hypoxylon_sp._EC38	1.99854	0.00640615	Mulching/DeepPlowing_N
Microbacterium_phage_Triscuit	1.99806	0.0397207	Mulching/DeepPlowing_G
Bradyrhizobium_genosp._SA-3	1.99595	0.037114	Mulching/DeepPlowing_N
Eutypa_lata	1.99559	0.00218262	Mulching/DeepPlowing_N
Streptomyces_phage_CricKo	1.99314	0.0479375	Mulching/DeepPlowing_N
Verticillium_longisporum	1.98684	0.0343931	Mulching/DeepPlowing_N
Sphingomonadaceae_bacterium_PASS1	1.9857	0.0223594	Mulching/DeepPlowing_G
Golovinomyces_cichoracearum	1.98357	0.0277857	Mulching/DeepPlowing_N
Trichoderma_asperellum	1.97844	0.00269095	Mulching/DeepPlowing_G
Agrobacterium_sp._C13	1.97365	0.0395769	Mulching/DeepPlowing_G
Steroidobacter_agariperforans	1.97249	0.034207	Mulching/DeepPlowing_G
Porphyrobacter_sp._IPPAS_B-1204	1.97182	0.00517662	Mulching/DeepPlowing_G
Sporothrix_insectorum	1.96924	0.0320855	Mulching/DeepPlowing_G
Diaporthe_helianthi	1.9611	0.0302732	Mulching/DeepPlowing_G
Sphingorhabdus_rigui	1.95748	0.0155727	Mulching/DeepPlowing_G
Monosporascus_sp._mg162	1.95597	0.0224493	Mulching/DeepPlowing_G
Pantoea_ananatis	1.95414	0.0276852	Mulching/DeepPlowing_N
Trichoderma_longibrachiatum	1.94715	0.0272214	Mulching/DeepPlowing_N
Steroidobacter_sp._SA29-B	1.94514	0.0170782	Mulching/DeepPlowing_G
Marinobacter_sp._EhN04	-1.94269	0.0397084	Mulching/DeepPlowing_G
Fusarium_avenaceum	1.94007	0.0150789	Mulching/DeepPlowing_N
Streptomyces_resistomycificus	1.93016	0.034207	Mulching/DeepPlowing_N
Streptomyces_luteus	1.92896	0.0233736	Mulching/DeepPlowing_N
Microdochium_bolleyi	1.92379	0.0337837	Mulching/DeepPlowing_G
Colletotrichum_tofieldiae	1.9234	0.00866687	Mulching/DeepPlowing_G
Burkholderiales_bacterium_RIFCSPHIGHO2_12_FULL_63_20	1.88643	0.0415516	Mulching/DeepPlowing_G
Cryphonectria_parasitica	1.87954	0.0217173	Mulching/DeepPlowing_G
Microdochium_bolleyi	1.87693	0.0264387	Mulching/DeepPlowing_N
Isoptericola_variabilis	1.86471	0.00824197	Mulching/DeepPlowing_N
Erythromicrobium_ramosum	1.85779	0.00464486	Mulching/DeepPlowing_G
Burkholderiales_bacterium_PBB3	1.85605	0.034207	Mulching/DeepPlowing_N
Bdellovibrio_sp._NC01	1.85164	0.0236785	Mulching/DeepPlowing_G
Fusarium_venenatum	1.84274	0.0457453	Mulching/DeepPlowing_N
Streptomyces_sp._AVP053U2	1.84066	0.0187059	Mulching/DeepPlowing_N
Steroidobacter_sp._YU21-B	1.83839	0.0187059	Mulching/DeepPlowing_G
Porphyrobacter_sp._SLTP	1.83731	0.0078738	Mulching/DeepPlowing_G
Fusarium_avenaceum	1.82638	0.000749005	Mulching/DeepPlowing_G
Sodiomyces_alkalinus	1.82296	0.00500283	Mulching/DeepPlowing_G
Cordyceps_javanica	1.81913	0.00794405	Mulching/DeepPlowing_G
Streptomyces_sp._3214.6	1.81431	0.00640223	Mulching/DeepPlowing_N
Pyricularia_pennisetigena	1.81022	0.00794405	Mulching/DeepPlowing_G
Vibrio_sp._2523-88	-1.80864	0.0395769	Mulching/DeepPlowing_N
Streptomyces_nigra	1.80521	0.0396061	Mulching/DeepPlowing_N
Monosporascus_sp._5C6A	1.80016	0.00809838	Mulching/DeepPlowing_G
Ensifer_sp._MMN_5	1.79998	0.0314917	Mulching/DeepPlowing_N
Cordyceps_sp._RAO-2017	1.79813	0.00197801	Mulching/DeepPlowing_G
Xanthomonas_sp._35Y	1.79466	0.0381106	Mulching/DeepPlowing_G
Candidatus_Woesearchaeota_archaeon	-1.79111	0.0470848	Mulching/DeepPlowing_G
Fusarium_verticillioides	1.78845	0.0170526	Mulching/DeepPlowing_N
Ustilaginoidea_virens	1.78734	0.0433912	Mulching/DeepPlowing_G
Herbidospora_sakaeratensis	1.78261	0.0435428	Mulching/DeepPlowing_G
Xylaria_hypoxylon	1.7821	0.0210939	Mulching/DeepPlowing_G
Fusarium_floridanum	1.78054	0.0266827	Mulching/DeepPlowing_N
Chitinophaga_vietnamensis	1.77993	0.0479807	Mulching/DeepPlowing_N
Streptomyces_phage_Moab	1.77071	0.012433	Mulching/DeepPlowing_G
Rhizobium_sp._BK393	1.77033	0.0355266	Mulching/DeepPlowing_G
Arthrobacter_phage_Brad	1.76703	0.000757768	Mulching/DeepPlowing_G
Trichoderma_virens	1.75401	0.00935799	Mulching/DeepPlowing_N
Fusarium_fujikuroi	1.75319	0.0397084	Mulching/DeepPlowing_N
Krasilnikoviella_flava	1.75281	0.0167662	Mulching/DeepPlowing_N
Microbacterium_virus_Hendrix	1.75146	0.0327004	Mulching/DeepPlowing_G
Colletotrichum_graminicola	1.75115	0.00602065	Mulching/DeepPlowing_N
Streptomyces_phage_Kardashian	1.74796	0.000841618	Mulching/DeepPlowing_N
Arthrobacter_virus_Jasmine	1.74752	0.0106301	Mulching/DeepPlowing_G
Rubrivivax_sp.	1.74736	0.0470848	Mulching/DeepPlowing_G
Colletotrichum_sublineola	1.74539	0.0068106	Mulching/DeepPlowing_G
Marinobacter_flavimaris	-1.74091	0.0382224	Mulching/DeepPlowing_G
Fusarium_poae	1.73734	0.0187991	Mulching/DeepPlowing_G
Klebsiella_quasipneumoniae	1.73383	0.0402226	Mulching/DeepPlowing_G
Hyaloscypha_variabilis	1.73307	0.0273407	Mulching/DeepPlowing_N
Diaporthe_helianthi	1.7305	0.0150789	Mulching/DeepPlowing_N
Candidatus_Diapherotrites_archaeon	-1.72832	0.0479375	Mulching/DeepPlowing_G
Streptomyces_sp._Ncost-T10-10d	1.72702	0.0379865	Mulching/DeepPlowing_N
Streptomyces_sp._Ls2151	1.72698	0.0186059	Mulching/DeepPlowing_N
Chalara_longipes	1.72106	0.0163177	Mulching/DeepPlowing_N
Neopestalotiopsis_sp._37M	1.72005	0.00668517	Mulching/DeepPlowing_G
Comamonas_sp._Tr-654	-1.71745	0.0311893	Mulching/DeepPlowing_N
Moelleriella_libera	1.71591	0.00557717	Mulching/DeepPlowing_N
Streptomyces_viridochromogenes	1.71449	0.0204636	Mulching/DeepPlowing_N
Metarhizium_album	1.71316	0.0130131	Mulching/DeepPlowing_G
Nocardioides_albertanoniae	1.71043	0.034207	Mulching/DeepPlowing_N
Streptomyces_geranii	1.70989	0.0182693	Mulching/DeepPlowing_N
Colletotrichum_tanaceti	1.70775	0.0430396	Mulching/DeepPlowing_G
Streptomyces_sp._MUSC_125	1.69706	0.021329	Mulching/DeepPlowing_N
Variovorax_sp._B2	1.68615	0.0223594	Mulching/DeepPlowing_N
Streptomyces_sp._JHA19	1.68459	0.0412294	Mulching/DeepPlowing_N
Fusarium_sp._AF-4	1.68456	0.00098544	Mulching/DeepPlowing_G
Streptomyces_sp._SID8376	1.68151	0.0443947	Mulching/DeepPlowing_N
Trichoderma_virens	1.68057	0.0450887	Mulching/DeepPlowing_G
Colletotrichum_gloeosporioides	1.67975	0.015129	Mulching/DeepPlowing_N
Candidatus_Fluviicola_riflensis	1.67625	0.0232808	Mulching/DeepPlowing_G
Chitinophaga_sp._Mgbs1	1.67495	0.0257033	Mulching/DeepPlowing_N
Trichoderma_citrinoviride	1.67354	0.0106732	Mulching/DeepPlowing_G
Drechmeria_coniospora	1.67211	0.020827	Mulching/DeepPlowing_N
uncultured_proteobacterium	1.67069	0.0460957	Mulching/DeepPlowing_N
Streptomyces_sp._CNH099	1.66882	0.0217682	Mulching/DeepPlowing_N
Streptomyces_sp._K1PN6	1.66609	0.0381851	Mulching/DeepPlowing_N
Streptomyces_spongiae	1.66309	0.00278414	Mulching/DeepPlowing_N
Fusarium_ambrosium	1.66252	0.0109778	Mulching/DeepPlowing_G
Thermocatellispora_tengchongensis	1.66216	0.0402226	Mulching/DeepPlowing_N
Gordonia_phage_Rickmore	1.65947	0.000392993	Mulching/DeepPlowing_G
Candidatus_Saccharibacteria_bacterium_32-49-12	1.65484	0.0078738	Mulching/DeepPlowing_G
Pyricularia_pennisetigena	1.65446	0.0183206	Mulching/DeepPlowing_N
Streptomyces_sp._HG99	1.64739	0.0314917	Mulching/DeepPlowing_N
Pyricularia_oryzae	1.64669	0.0168792	Mulching/DeepPlowing_N
Streptomyces_sp._Z26	1.64589	0.00379016	Mulching/DeepPlowing_N
Metarhizium_brunneum	1.63524	0.00530409	Mulching/DeepPlowing_N
Streptomyces_sp._NRRL_S-146	1.63227	0.0470848	Mulching/DeepPlowing_N
Colletotrichum_musicola	1.62539	0.0311578	Mulching/DeepPlowing_N
Rhodococcus_virus_Poco6	1.62461	0.0195675	Mulching/DeepPlowing_G
Trichoderma_atroviride	1.62409	0.00682223	Mulching/DeepPlowing_N
Streptomyces_sp._NRRL_B-24085	1.61405	0.0257033	Mulching/DeepPlowing_N
Streptomyces_stelliscabiei	1.60068	0.0325995	Mulching/DeepPlowing_N
Metarhizium_majus	1.59975	0.0244594	Mulching/DeepPlowing_N
Streptomyces_sp._NRRL_F-5135	1.59043	0.0118396	Mulching/DeepPlowing_N
Steroidobacter_soli	1.58844	0.0128993	Mulching/DeepPlowing_G
Isoptericola_halotolerans	1.58774	0.0244013	Mulching/DeepPlowing_N
Streptomyces_sp._SID12488	1.58463	0.0246729	Mulching/DeepPlowing_N
Streptomyces_sp._ADI92-24	1.5814	0.0264387	Mulching/DeepPlowing_N
Emericellopsis_sp._1a5	1.57685	0.0182693	Mulching/DeepPlowing_N
Streptomyces_fimicarius	1.57681	0.00465148	Mulching/DeepPlowing_N
Streptomyces_sp._Root1310	1.57562	0.0415387	Mulching/DeepPlowing_N
Phialocephala_subalpina	1.57379	0.0240317	Mulching/DeepPlowing_G
Steroidobacter_cummioxidans	1.57337	0.0170782	Mulching/DeepPlowing_G
Arthrobacter_phage_Qui	1.56117	0.00729327	Mulching/DeepPlowing_G
Streptomyces_phage_Comrade	1.55918	0.00613891	Mulching/DeepPlowing_N
Fusarium_nygamai	1.55697	0.0321405	Mulching/DeepPlowing_G
Microbacterium_hydrocarbonoxydans	1.55534	0.0117175	Mulching/DeepPlowing_N
Cordyceps_militaris	1.55511	0.0289515	Mulching/DeepPlowing_N
Streptomyces_sp._WM6373	1.55429	0.0499245	Mulching/DeepPlowing_N
Chitinophaga_flava	1.54765	0.0117175	Mulching/DeepPlowing_N
Torrubiella_hemipterigena	1.53978	0.00141258	Mulching/DeepPlowing_G
Streptomyces_phage_Wakanda	1.52541	0.0224493	Mulching/DeepPlowing_G
Streptomyces_sp._111WW2	1.52004	0.0323199	Mulching/DeepPlowing_N
Streptomyces_graminilatus	1.51826	9.58851e-05	Mulching/DeepPlowing_N
Fusarium_venenatum	1.51781	0.00931618	Mulching/DeepPlowing_G
Streptomyces_sp._SID339	1.50827	0.0378005	Mulching/DeepPlowing_N
Fusarium_sp._AF-6	1.50533	0.0175256	Mulching/DeepPlowing_G
Microbacterium_oxydans	1.50521	0.000328532	Mulching/DeepPlowing_N
Streptomyces_malaysiensis	1.50208	0.0402226	Mulching/DeepPlowing_N
Isoptericola_sp._TLY-12	1.49556	0.00963088	Mulching/DeepPlowing_G
Saitoella_complicata	1.49478	0.0402226	Mulching/DeepPlowing_N
Colletotrichum_graminicola	1.49318	0.0432095	Mulching/DeepPlowing_G
Fusarium_floridanum	1.49067	0.0160676	Mulching/DeepPlowing_G
Streptomyces_microflavus	1.48069	0.0216327	Mulching/DeepPlowing_N
Oerskovia_enterophila	1.47818	0.0106301	Mulching/DeepPlowing_N
Pyricularia_grisea	1.47456	0.0243051	Mulching/DeepPlowing_N
Arthrobacter_sp._4R501	1.47317	0.0435428	Mulching/DeepPlowing_N
Scytalidium_lignicola	1.47056	0.000729218	Mulching/DeepPlowing_G
Streptomyces_fradiae	1.46677	0.00871403	Mulching/DeepPlowing_N
Trichoderma_parareesei	1.46131	0.00444725	Mulching/DeepPlowing_G
Pseudomonadales_bacterium_RIFCSPLOWO2_12_59_9	1.45956	0.0117175	Mulching/DeepPlowing_G
Metarhizium_majus	1.45762	0.0437583	Mulching/DeepPlowing_G
Streptomyces_sp._RPA4-2	1.45087	0.0193815	Mulching/DeepPlowing_N
Streptomyces_sp._Root55	1.45081	0.0428239	Mulching/DeepPlowing_N
Fusarium_acutatum	1.44792	0.0183206	Mulching/DeepPlowing_G
Isoptericola_chiayiensis	1.44722	0.0276852	Mulching/DeepPlowing_N
Pseudogymnoascus_sp._VKM_F-4518_(FW-2643)	1.44529	0.0314524	Mulching/DeepPlowing_N
Richelia_sp._SL_2_1	-1.44517	0.010264	Mulching/DeepPlowing_G
Kribbella_sandramycini	1.4442	0.0435428	Mulching/DeepPlowing_N
Daldinia_sp._EC12	1.44086	0.0140625	Mulching/DeepPlowing_G
Candidatus_Korarchaeota_archaeon	-1.43892	0.0106301	Mulching/DeepPlowing_G
Streptomyces_sp._NEAU-sy36	1.43774	0.0275348	Mulching/DeepPlowing_G
Herbidospora_sakaeratensis	1.4357	0.018412	Mulching/DeepPlowing_N
Streptomyces_sp._DI166	1.43505	0.0187059	Mulching/DeepPlowing_N
Trichoderma_lentiforme	1.43397	0.0458981	Mulching/DeepPlowing_G
Grosmannia_clavigera	1.43367	0.0115902	Mulching/DeepPlowing_N
Xylaria_multiplex	1.43364	0.0348	Mulching/DeepPlowing_N
Microbacterium_phage_FuzzBuster	1.4332	0.0199687	Mulching/DeepPlowing_G
Streptomyces_virus_Mildred21	1.42685	0.0172558	Mulching/DeepPlowing_G
Microbacterium_saccharophilum	1.42257	0.0443947	Mulching/DeepPlowing_N
Ophiocordyceps_australis	1.42043	0.00139258	Mulching/DeepPlowing_G
Ralstonia_phage_RP13	-1.41824	0.0261494	Mulching/DeepPlowing_N
Streptomyces_sp._8K308	1.41773	0.0402226	Mulching/DeepPlowing_G
Methylobacterium_sp._285MFTsu5.1	1.41253	0.022292	Mulching/DeepPlowing_G
Cadophora_sp._DSE1049	1.41188	0.00902455	Mulching/DeepPlowing_G
Streptomyces_virus_Mildred21	1.4076	0.0330613	Mulching/DeepPlowing_N
Fusarium_coffeatum	1.40182	0.0218101	Mulching/DeepPlowing_N
Brevibacillus_sp._CFH_S0501	-1.40084	0.0106301	Mulching/DeepPlowing_G
Agrobacterium_sp.	1.39788	0.0470848	Mulching/DeepPlowing_N
Colletotrichum_nymphaeae	1.39781	0.0355266	Mulching/DeepPlowing_N
Trichoderma_atroviride	1.39514	0.00282966	Mulching/DeepPlowing_G
Isoptericola_sp._CG_20/1183	1.39434	0.0231725	Mulching/DeepPlowing_N
Spartobacteria_bacterium	-1.38829	0.034207	Mulching/DeepPlowing_N
Streptomyces_sp._NRRL_WC-3604	1.38817	0.00975562	Mulching/DeepPlowing_N
Microbacterium_sp._LAM7116	1.38438	0.0378005	Mulching/DeepPlowing_N
Fusarium_flagelliforme	1.38178	0.00573051	Mulching/DeepPlowing_G
Streptomyces_sp._SLBN-118	1.38173	0.0256748	Mulching/DeepPlowing_N
Synechocystis_sp._CACIAM_05	-1.38159	0.0202219	Mulching/DeepPlowing_N
Sinomonas_atrocyanea	1.38013	0.00580178	Mulching/DeepPlowing_N
Nocardia_fusca	1.37997	0.0301737	Mulching/DeepPlowing_N
Pseudomonas_phage_JG054	1.37169	0.0239813	Mulching/DeepPlowing_G
Streptomyces_sp._ADI98-12	1.37165	0.0243075	Mulching/DeepPlowing_N
Colletotrichum_scovillei	1.37004	0.0365987	Mulching/DeepPlowing_N
Streptomyces_sparsogenes	1.36946	0.0223594	Mulching/DeepPlowing_N
Streptomyces_sp._E2N166	1.36918	0.0437655	Mulching/DeepPlowing_N
Nocardia_amikacinitolerans	1.36813	0.0235977	Mulching/DeepPlowing_N
Drechmeria_coniospora	1.36609	0.0391403	Mulching/DeepPlowing_G
Gordonia_phage_Rickmore	1.36268	0.0140742	Mulching/DeepPlowing_N
Streptomyces_sp._C1-2	1.36162	0.0382224	Mulching/DeepPlowing_N
Streptomyces_virginiae	1.36083	0.00213384	Mulching/DeepPlowing_N
Porphyrobacter_sp._AAP60	1.35938	0.0204636	Mulching/DeepPlowing_G
Rathayibacter_sp._AY1C1	-1.35931	0.0119685	Mulching/DeepPlowing_N
Streptosporangium_becharense	1.35818	0.0470848	Mulching/DeepPlowing_G
Streptomyces_sp._SID5910	1.35757	0.0265981	Mulching/DeepPlowing_N
Streptomyces_himastatinicus	1.35702	0.0479375	Mulching/DeepPlowing_N
Nitrospira_sp._UW-LDO-02	1.35655	0.037114	Mulching/DeepPlowing_G
Streptomyces_phage_FidgetOrca	1.35092	0.0054626	Mulching/DeepPlowing_N
Colletotrichum_sojae	1.35072	0.0224492	Mulching/DeepPlowing_G
Betaproteobacteria_bacterium_HGW-Betaproteobacteria-18	1.35058	0.0435428	Mulching/DeepPlowing_G
Rhizobium_sp._SJZ105	1.34808	0.0146192	Mulching/DeepPlowing_N
Methylobacterium_sp._285MFTsu5.1	1.34798	0.0308774	Mulching/DeepPlowing_N
Thalassospira_xiamenensis	1.34779	0.00234923	Mulching/DeepPlowing_N
Comamonadaceae_bacterium_CG_4_9_14_0_8_um_filter_60_18	1.34479	0.034207	Mulching/DeepPlowing_N
Streptomyces_phage_HotFries	1.34428	0.00405736	Mulching/DeepPlowing_N
Leifsonia_shinshuensis	1.34241	0.00112214	Mulching/DeepPlowing_N
Limnohabitans_sp._Hippo4	1.34079	0.00681407	Mulching/DeepPlowing_G
Nocardia_asiatica	1.33779	0.0381851	Mulching/DeepPlowing_N
Streptomyces_sp._sk2.1	1.33384	0.0479807	Mulching/DeepPlowing_N
Caulobacter_sp.	1.33369	0.0223594	Mulching/DeepPlowing_G
Streptomyces_sp._150FB	1.32518	0.00342514	Mulching/DeepPlowing_N
Gordonia_phage_Secretariat	1.32445	0.018693	Mulching/DeepPlowing_G
Zhihengliuella_halotolerans	1.32103	0.0402226	Mulching/DeepPlowing_N
Microbacterium_sp._CFH_90308	1.3207	0.0314917	Mulching/DeepPlowing_N
Colletotrichum_siamense	1.31892	0.0243591	Mulching/DeepPlowing_N
Streptomyces_sp._WAC01280	1.31884	0.0435428	Mulching/DeepPlowing_N
Streptomyces_sp._WAC05858	1.31835	0.0154391	Mulching/DeepPlowing_N
Marinobacter_sp._JB02H27	-1.31778	0.00517662	Mulching/DeepPlowing_G
Colletotrichum_sublineola	1.31626	0.03281	Mulching/DeepPlowing_N
Chitinophaga_sp._YR627	1.31469	0.034207	Mulching/DeepPlowing_N
Iodobacter_sp._H11R3	1.30997	0.0204636	Mulching/DeepPlowing_G
Streptomyces_sp._NRRL_F-4707	1.30412	0.0433912	Mulching/DeepPlowing_N
Streptomyces_griseoruber	1.30272	0.00237159	Mulching/DeepPlowing_N
Streptomyces_sp._NRRL_WC-3753	1.30221	0.0115706	Mulching/DeepPlowing_G
Venustampulla_echinocandica	1.30175	0.00271321	Mulching/DeepPlowing_G
Arthrobacter_sp._BB-1	1.29908	0.0068248	Mulching/DeepPlowing_N
Sporothrix_schenckii	1.29885	0.0245897	Mulching/DeepPlowing_N
Candidatus_Paracaedibacter_symbiosus	1.2963	0.0256177	Mulching/DeepPlowing_N
Microbacterium_lindanitolerans	1.29449	0.00112214	Mulching/DeepPlowing_N
Ophiostoma_piceae	1.29296	0.0349686	Mulching/DeepPlowing_G
Paucibacter_aquatile	1.29251	0.037114	Mulching/DeepPlowing_G
Verticillium_nonalfalfae	1.29204	0.00527071	Mulching/DeepPlowing_N
Curvibacter_gracilis	1.29189	0.00517662	Mulching/DeepPlowing_G
Streptomyces_phage_PherryCruz	1.28683	0.033972	Mulching/DeepPlowing_G
Glarea_lozoyensis	1.28557	0.0337837	Mulching/DeepPlowing_N
Streptomyces_paludis	1.28398	0.00527071	Mulching/DeepPlowing_N
Colletotrichum_asianum	1.2803	0.0351674	Mulching/DeepPlowing_N
Streptomyces_sp._SW4	1.27835	0.0261381	Mulching/DeepPlowing_N
Chrysoporthe_cubensis	1.27801	0.0366634	Mulching/DeepPlowing_N
Microbacterium_sp.	1.27792	0.00963088	Mulching/DeepPlowing_N
Streptomyces_sp._Ru62	1.27644	0.0185718	Mulching/DeepPlowing_N
Fusarium_fujikuroi	1.27469	0.0267987	Mulching/DeepPlowing_G
Solirubrobacterales_bacterium_70-9	-1.27384	0.00710492	Mulching/DeepPlowing_G
Xylaria_flabelliformis	1.27303	0.0188869	Mulching/DeepPlowing_G
Streptomyces_sp._P3	1.2726	0.043932	Mulching/DeepPlowing_N
Kibdelosporangium_sp._4NS15	1.26853	0.0435428	Mulching/DeepPlowing_N
Colwellia_echini	1.26807	0.0107664	Mulching/DeepPlowing_N
Micromonospora_tulbaghiae	1.2668	0.0244013	Mulching/DeepPlowing_G
Xylaria_longipes	1.26507	0.0296356	Mulching/DeepPlowing_G
Streptomyces_sp._Go-475	1.26202	0.0412686	Mulching/DeepPlowing_N
Labedella_gwakjiensis	1.25512	0.000757768	Mulching/DeepPlowing_N
Coprinellus_angulatus	1.25071	0.01596	Mulching/DeepPlowing_G
Nocardia_sienata	1.25049	0.033972	Mulching/DeepPlowing_N
Colletotrichum_spinosum	1.24888	0.0123585	Mulching/DeepPlowing_N
Coleophoma_crateriformis	1.24847	0.0285909	Mulching/DeepPlowing_G
Porphyrobacter_sp._TH134	1.24844	0.0187059	Mulching/DeepPlowing_G
Streptomyces_sp._SID2119	1.24739	0.0163177	Mulching/DeepPlowing_N
Candidatus_Saccharibacteria_bacterium_49-20	1.24678	0.0265981	Mulching/DeepPlowing_N
Micromonospora_sp._HM134	1.24517	0.0204636	Mulching/DeepPlowing_G
Amycolatopsis_lurida	1.2437	0.0343931	Mulching/DeepPlowing_N
Brevibacterium_oceani	1.24074	0.00075065	Mulching/DeepPlowing_N
Rhodoferax_sp._YR267	1.2393	0.0265981	Mulching/DeepPlowing_G
Daldinia_childiae	1.2352	0.0118213	Mulching/DeepPlowing_G
Pseudactinotalea_suaedae	1.23485	0.0479807	Mulching/DeepPlowing_N
Streptomyces_triticiradicis	1.23331	0.0165133	Mulching/DeepPlowing_N
Streptomyces_qinglanensis	1.23107	0.0433834	Mulching/DeepPlowing_N
Xylanibacterium_ulmi	1.22584	0.0479375	Mulching/DeepPlowing_G
Metarhizium_brunneum	1.22262	0.0101207	Mulching/DeepPlowing_G
Euryarchaeota_archaeon_RBG_19FT_COMBO_69_17	-1.22166	0.0301737	Mulching/DeepPlowing_G
Streptomyces_hygroscopicus	1.21868	0.0223594	Mulching/DeepPlowing_N
Fusarium_anthophilum	1.21865	0.0285677	Mulching/DeepPlowing_N
Haloactinobacterium_sp._T3246_1	1.21673	0.00250891	Mulching/DeepPlowing_N
Aspergillus_udagawae	1.21601	0.0340271	Mulching/DeepPlowing_N
Streptomyces_parvus	1.21383	0.0448546	Mulching/DeepPlowing_N
Streptomyces_sp._HUCO-GS316	1.2122	0.00342514	Mulching/DeepPlowing_N
Fusarium_sporotrichioides	1.21142	0.014409	Mulching/DeepPlowing_N
Streptomyces_cyaneogriseus	1.20981	0.0470848	Mulching/DeepPlowing_N
Alcanivorax_sp.	-1.20854	0.0435428	Mulching/DeepPlowing_G
Candidatus_Lokiarchaeota_archaeon	1.20585	0.034207	Mulching/DeepPlowing_G
Streptomyces_sp._KhCrAH-43	1.2032	0.00165155	Mulching/DeepPlowing_G
Luteimonas_mephitis	1.20304	0.0204636	Mulching/DeepPlowing_G
Colletotrichum_simmondsii	1.20249	0.0442051	Mulching/DeepPlowing_G
Gulosibacter_sp._YIM_102482-1	1.20072	0.0196029	Mulching/DeepPlowing_N
cyanobiont_of_Ornithocercus_magnificus	1.19912	0.00846028	Mulching/DeepPlowing_G
Lysobacter_sp._WF-2	1.19909	0.0435428	Mulching/DeepPlowing_G
Streptomyces_sp._C	1.19892	0.0108172	Mulching/DeepPlowing_N
Tenacibaculum_sp.	1.19585	0.0223594	Mulching/DeepPlowing_G
Comamonas_aquatica	1.19585	0.0037232	Mulching/DeepPlowing_G
Pseudoxanthomonas_sp._OG2	1.19323	0.00264198	Mulching/DeepPlowing_G
Streptomyces_sp._SID10853	1.19318	0.0479375	Mulching/DeepPlowing_N
Streptomyces_sp._HGB0020	1.19236	0.0265981	Mulching/DeepPlowing_N
Thermomonas_sp.	1.19027	0.0223594	Mulching/DeepPlowing_G
Solirubrobacterales_bacterium_67-14	-1.18858	0.034207	Mulching/DeepPlowing_G
Haloactinobacterium_sp._F300	1.18821	0.00164255	Mulching/DeepPlowing_N
Haloactinobacterium_sp._HY164	1.18805	0.00371411	Mulching/DeepPlowing_N
Aquabacterium_sp._A08	1.18595	0.034207	Mulching/DeepPlowing_G
Flavobacterium_aquaticum	1.18542	0.0489046	Mulching/DeepPlowing_G
Streptomyces_sp._A7024	1.1835	0.034207	Mulching/DeepPlowing_N
Chitinophaga_sp._1303	1.18285	0.00416163	Mulching/DeepPlowing_N
Gordonia_phage_Crocheter	1.18257	0.00151062	Mulching/DeepPlowing_N
Porphyrobacter_colymbi	1.18219	0.0470848	Mulching/DeepPlowing_G
Streptomyces_phage_FrodoSwaggins	1.17981	0.0387345	Mulching/DeepPlowing_G
Streptomyces_phage_Bmoc	1.17443	0.0226176	Mulching/DeepPlowing_N
Cellulomonas_iranensis	1.17413	0.00903158	Mulching/DeepPlowing_N
Colletotrichum_fioriniae	1.1709	0.0115706	Mulching/DeepPlowing_G
Halobacteriovorax_sp._JY17	1.16894	0.0187059	Mulching/DeepPlowing_N
Acidobacteria_bacterium_ADurb.Bin051	-1.16847	0.000210508	Mulching/DeepPlowing_G
Porphyrobacter_donghaensis	1.1677	0.0314917	Mulching/DeepPlowing_G
Candidatus_Saccharibacteria_bacterium_47-87	1.1666	0.0265981	Mulching/DeepPlowing_N
uncultured_bacterium_lac146	-1.16658	0.00399954	Mulching/DeepPlowing_G
Marinobacter_segnicrescens	-1.16597	0.0141821	Mulching/DeepPlowing_G
Arthrobacter_sp._49Tsu3.1M3	1.1652	0.0200166	Mulching/DeepPlowing_N
Porphyrobacter_dokdonensis	1.15913	0.0187059	Mulching/DeepPlowing_G
Microbacterium_phage_Hiddenleaf	1.15898	0.0479375	Mulching/DeepPlowing_G
Candidatus_Nephrothrix_sp._EaCA	1.15733	0.0078738	Mulching/DeepPlowing_N
Pseudoxanthomonas_sp._GM95	1.15661	0.00947198	Mulching/DeepPlowing_G
Vulcaniibacterium_gelatinicum	1.1566	0.037114	Mulching/DeepPlowing_G
Thermomonas_haemolytica	1.15379	0.0223594	Mulching/DeepPlowing_G
Streptomyces_sp._SID9944	1.15091	0.0183206	Mulching/DeepPlowing_N
Chloroflexi_bacterium_HGW-Chloroflexi-9	-1.1509	0.00112214	Mulching/DeepPlowing_G
Streptomyces_sp._F-7	1.15011	0.00120919	Mulching/DeepPlowing_N
Streptomyces_sp._NA03103	1.14794	0.0309979	Mulching/DeepPlowing_N
Actinoalloteichus_sp._GBA129-24	1.14641	0.0223594	Mulching/DeepPlowing_N
bacterium_HR30	-1.14483	0.00332595	Mulching/DeepPlowing_G
Nocardioides_sp._Root122	1.14311	0.0470848	Mulching/DeepPlowing_N
Gordonia_phage_Untouchable	1.13884	0.00108185	Mulching/DeepPlowing_G
Emergencia_sp._1XD21-50	1.13735	0.0406503	Mulching/DeepPlowing_N
Actinomadura_kijaniata	1.1366	0.034207	Mulching/DeepPlowing_N
Streptomyces_sp._IBTA2	1.13642	0.0396064	Mulching/DeepPlowing_N
Micromonospora_taraxaci	1.13532	0.00307525	Mulching/DeepPlowing_N
Erythrobacteraceae_bacterium_CCH12-C2	1.13428	0.0187059	Mulching/DeepPlowing_G
Anaerolinea_thermophila	-1.1321	0.000379499	Mulching/DeepPlowing_G
Rhodococcus_sp._C1-24	-1.13121	0.000999647	Mulching/DeepPlowing_G
Brevundimonas_sp._357	1.13101	0.0302056	Mulching/DeepPlowing_G
Fusarium_gaditjirri	1.13076	0.013609	Mulching/DeepPlowing_G
Herbiconiux_ginsengi	1.12906	0.00903158	Mulching/DeepPlowing_N
Streptomyces_sp._PRKS01-65	1.12887	0.0460957	Mulching/DeepPlowing_N
Hydrogenophaga_sp._A37	1.12821	0.034207	Mulching/DeepPlowing_G
Porphyrobacter_sp._CACIAM_03H1	1.12439	0.0470848	Mulching/DeepPlowing_G
Cellulomonas_shaoxiangyii	1.1232	0.037114	Mulching/DeepPlowing_N
Xylanimonas_cellulosilytica	1.12317	0.0128993	Mulching/DeepPlowing_N
Stenotrophomonas_pictorum	1.123	0.0204636	Mulching/DeepPlowing_G
Streptomyces_phage_Wakanda	1.12112	0.043932	Mulching/DeepPlowing_N
Rhodococcus_sp._KBS0724	-1.11952	0.000417745	Mulching/DeepPlowing_G
Gammaproteobacteria_bacterium_RIFCSPLOWO2_12_FULL_42_18	-1.11882	0.0458981	Mulching/DeepPlowing_G
Acanthamoeba_polyphaga_mimivirus	1.11865	0.000516104	Mulching/DeepPlowing_G
Vulcaniibacterium_tengchongense	1.11669	0.0314917	Mulching/DeepPlowing_G
Amycolatopsis_bartoniae	1.11532	0.0244013	Mulching/DeepPlowing_G
Armatimonadetes_bacterium_CSP1-3	-1.11527	0.00464486	Mulching/DeepPlowing_G
Lysobacter_pythonis	1.11389	0.0470848	Mulching/DeepPlowing_G
Microbacterium_sp._TNHR37B	1.11319	0.0301737	Mulching/DeepPlowing_N
Streptomyces_wuyuanensis	1.11234	0.0470848	Mulching/DeepPlowing_N
Pseudoxanthomonas_sp._Root65	1.11186	0.0223594	Mulching/DeepPlowing_G
Streptomyces_sp._Sge12	1.10811	0.00414287	Mulching/DeepPlowing_N
bacterium_SCN_57-13	-1.10786	0.00234923	Mulching/DeepPlowing_G
Streptomyces_phage_BoomerJR	1.10744	0.00449677	Mulching/DeepPlowing_N
Pseudoxanthomonas_sp._NML171591	1.10612	0.0117175	Mulching/DeepPlowing_G
Chlorociboria_aeruginascens	1.10587	0.0172236	Mulching/DeepPlowing_G
Burkholderiales_bacterium_28-67-8	1.10531	0.0078738	Mulching/DeepPlowing_G
Cellulosimicrobium_cellulans	1.10354	0.00963088	Mulching/DeepPlowing_N
Sinorhizobium_meliloti	1.10313	0.034207	Mulching/DeepPlowing_N
Hirsutella_thompsonii	1.0987	0.0483909	Mulching/DeepPlowing_N
Pseudoxanthomonas_sp._3HH-4	1.09672	0.0155727	Mulching/DeepPlowing_G
Cellulomonas_soli	1.09619	0.00264198	Mulching/DeepPlowing_N
Streptomyces_sviceus	1.09576	0.0458981	Mulching/DeepPlowing_N
Verrucosispora_sp._NA02020	1.09565	0.0126801	Mulching/DeepPlowing_G
Naasia_lichenicola	1.09281	0.0078738	Mulching/DeepPlowing_N
Acidobacteria_bacterium_RBG_16_68_9	-1.09118	0.000865277	Mulching/DeepPlowing_G
Chlorociboria_aeruginascens	1.09051	0.00157953	Mulching/DeepPlowing_N
Salinibacterium_amurskyense	1.08983	0.0187059	Mulching/DeepPlowing_N
Dictyobacter_aurantiacus	-1.08761	0.0029666	Mulching/DeepPlowing_G
Sphingobium_sp._15-1	1.08597	0.00710492	Mulching/DeepPlowing_G
Chitinophaga_sp._Ak27	1.08482	0.00342514	Mulching/DeepPlowing_N
Massilia_sp._Mn16-1_5	1.08454	0.0016358	Mulching/DeepPlowing_G
Phytoactinopolyspora_endophytica	1.08404	0.00462814	Mulching/DeepPlowing_N
Luteimonas_lumbrici	1.08046	0.0187059	Mulching/DeepPlowing_G
Verrucomicrobia_bacterium_A1	1.07999	0.0223594	Mulching/DeepPlowing_G
Luteimonas_sp._9C	1.07869	0.0187059	Mulching/DeepPlowing_G
Streptomyces_sp._HIT-DPA4	1.07796	0.0200406	Mulching/DeepPlowing_N
Oerskovia_sp._Root918	1.07753	0.0081019	Mulching/DeepPlowing_N
Blastococcus_sp._CCUG_61487	-1.07721	0.034207	Mulching/DeepPlowing_G
Streptomyces_sp._2231.1	1.07541	0.0410207	Mulching/DeepPlowing_N
Actinomadura_hallensis	1.07487	0.00416163	Mulching/DeepPlowing_N
Luteimonas_arsenica	1.07395	0.0128993	Mulching/DeepPlowing_G
Pseudoxanthomonas_sp.	1.07386	0.0155727	Mulching/DeepPlowing_G
Xylanibacterium_ulmi	1.07361	0.0326667	Mulching/DeepPlowing_N
Xanthomonas_sacchari	1.07182	0.0086351	Mulching/DeepPlowing_G
Arthrobacter_sp._SW1	1.07173	0.012433	Mulching/DeepPlowing_G
Candidatus_Lumbricidophila_eiseniae	1.07038	0.00729327	Mulching/DeepPlowing_N
[Micrococcus_luteus]_ATCC_49442	1.06912	0.0497952	Mulching/DeepPlowing_N
Pseudoxanthomonas_sp._NML140781	1.06765	0.0117175	Mulching/DeepPlowing_G
Pseudomonas_virus_PaMx25	1.06532	0.00647037	Mulching/DeepPlowing_G
Lysobacter_daejeonensis	1.06411	0.0170782	Mulching/DeepPlowing_G
Streptomyces_phage_Gibson	1.06223	0.0497952	Mulching/DeepPlowing_G
Lachnellula_suecica	1.06206	0.0343875	Mulching/DeepPlowing_G
Lysobacter_sp._Root916	1.06111	0.00710492	Mulching/DeepPlowing_G
Cadophora_sp._DSE1049	1.05808	0.0449229	Mulching/DeepPlowing_N
Nitrospira_japonica	-1.05762	0.034207	Mulching/DeepPlowing_N
Streptomyces_phage_Bmoc	1.05576	0.00398103	Mulching/DeepPlowing_G
Luteimonas_terricola	1.05467	0.0187059	Mulching/DeepPlowing_G
Sphingobium_sp._Leaf26	1.05367	0.0223594	Mulching/DeepPlowing_G
Rhizobium_wenxiniae	1.05362	0.0168792	Mulching/DeepPlowing_N
Streptomyces_pseudovenezuelae	1.05347	0.0112473	Mulching/DeepPlowing_N
Sphingobacterium_multivorum	1.05299	0.0361987	Mulching/DeepPlowing_G
Amycolatopsis_pithecelloba	1.0529	0.0223594	Mulching/DeepPlowing_N
Lysobacter_sp._yr284	1.05285	0.0314917	Mulching/DeepPlowing_G
Arthrobacter_phage_Nason	1.05122	0.00146037	Mulching/DeepPlowing_N
candidate_division_TM6_bacterium_RIFCSPHIGHO2_12_FULL_32_22	-1.05083	0.0146192	Mulching/DeepPlowing_N
Lysobacter_sp._YJ15	1.05083	0.0402226	Mulching/DeepPlowing_G
Chitinophaga_dinghuensis	1.04987	0.0353341	Mulching/DeepPlowing_G
Streptomyces_samsunensis	1.04952	0.0320496	Mulching/DeepPlowing_N
bacterium_HR12	-1.04839	0.0289585	Mulching/DeepPlowing_G
Streptomyces_sp._CB04723	1.04832	0.013468	Mulching/DeepPlowing_N
Arthrobacter_phage_Richie	1.04818	0.0466039	Mulching/DeepPlowing_G
marine_actinobacterium_PHSC20C1	1.04732	0.0170782	Mulching/DeepPlowing_N
Streptomyces_sp._NRRL_F-6602	1.04667	0.00457818	Mulching/DeepPlowing_N
Porphyrobacter_sp._HL-46	1.04588	0.0402226	Mulching/DeepPlowing_G
Nocardia_cyriacigeorgica	1.04576	0.000577964	Mulching/DeepPlowing_N
Frankiales_bacterium	-1.04539	0.000112745	Mulching/DeepPlowing_G
Streptomyces_luridiscabiei	1.04531	0.0167933	Mulching/DeepPlowing_N
Streptomyces_sp._MP131-18	1.045	0.0412686	Mulching/DeepPlowing_N
Marinomonas_spartinae	1.0423	0.0255227	Mulching/DeepPlowing_N
Francisella_philomiragia	1.04194	0.0499002	Mulching/DeepPlowing_G
Acidithiobacillus_ferrivorans	1.04142	0.0163177	Mulching/DeepPlowing_G
Pontibacter_pudoricolor	1.04141	0.005761	Mulching/DeepPlowing_N
Glaciihabitans_arcticus	1.04138	0.0106301	Mulching/DeepPlowing_N
Bifidobacterium_scaligerum	-1.04077	0.0313454	Mulching/DeepPlowing_G
Streptomyces_venezuelae	1.04074	0.0314917	Mulching/DeepPlowing_N
Arthrobacter_sp._EpRS66	1.04045	0.038414	Mulching/DeepPlowing_G
Rhizobium_sp._YR295	1.04015	0.0402226	Mulching/DeepPlowing_N
Nocardia_sp._FDAARGOS_372	1.03978	0.039467	Mulching/DeepPlowing_N
Umezawaea_tangerina	1.03847	0.0244013	Mulching/DeepPlowing_G
Stenotrophomonas_sp._MYb238	1.03832	0.0170782	Mulching/DeepPlowing_G
Comamonadaceae_bacterium_BICA1-1	1.03647	0.0355245	Mulching/DeepPlowing_G
Deltaproteobacteria_bacterium_RBG_16_66_15	1.03634	0.00157953	Mulching/DeepPlowing_N
Agromyces_sp._Leaf222	1.0361	0.0353341	Mulching/DeepPlowing_N
Nitrosomonadales_bacterium_skT11	1.03556	0.037114	Mulching/DeepPlowing_G
Kitasatospora_phosalacinea	1.03536	0.0381851	Mulching/DeepPlowing_N
Fusarium_agapanthi	1.03528	0.00884208	Mulching/DeepPlowing_N
Xanthomonas_perforans	1.03515	0.0106301	Mulching/DeepPlowing_G
Streptomyces_sp._alain-838	1.03506	0.0259626	Mulching/DeepPlowing_N
Mesorhizobium_sp._B2-8-9	-1.03441	0.00416163	Mulching/DeepPlowing_G
Streptomyces_sp._YC504	1.03406	0.00513806	Mulching/DeepPlowing_N
Streptomyces_turgidiscabies	1.03375	0.0289585	Mulching/DeepPlowing_N
Streptomyces_lasalocidi	1.03284	0.0347216	Mulching/DeepPlowing_N
Streptomyces_phage_Wentworth	1.03276	0.0497952	Mulching/DeepPlowing_G
Flavobacterium_sp._SNL9	-1.03196	0.0126138	Mulching/DeepPlowing_G
Frankia_inefficax	-1.03152	0.000986239	Mulching/DeepPlowing_G
Chitinophaga_barathri	1.03048	0.0289585	Mulching/DeepPlowing_G
Porphyrobacter_sanguineus	1.03035	0.0244013	Mulching/DeepPlowing_G
Stenotrophomonas_sp._SAU14A_NAIMI4_8	1.02886	0.037114	Mulching/DeepPlowing_G
[Microbacterium]_sp._SLBN-1	1.02856	0.0204636	Mulching/DeepPlowing_N
Streptomyces_sp._Z022	1.02851	0.0183206	Mulching/DeepPlowing_N
Nocardiopsis_dassonvillei	1.02759	0.00871403	Mulching/DeepPlowing_N
Lysobacter_capsici	1.02726	0.0265981	Mulching/DeepPlowing_G
Streptomyces_phage_Soshi	1.02692	0.0150788	Mulching/DeepPlowing_N
Terribacillus_saccharophilus	1.02561	0.00626016	Mulching/DeepPlowing_N
Alkalinema_sp._RU_4_3	1.02451	0.0141821	Mulching/DeepPlowing_G
Acidovorax_sp._Root267	1.02449	0.037114	Mulching/DeepPlowing_G
Burkholderia_sp._S171	1.02367	0.0141821	Mulching/DeepPlowing_G
Isoptericola_dokdonensis	1.02366	0.0347216	Mulching/DeepPlowing_N
Helicocarpus_griseus	1.02336	0.0498307	Mulching/DeepPlowing_G
Filimonas_lacunae	1.02252	0.0470848	Mulching/DeepPlowing_N
Byssochlamys_spectabilis	1.02237	0.00212578	Mulching/DeepPlowing_G
Stenotrophomonas_sp._CPCC_101271	1.02217	0.0351453	Mulching/DeepPlowing_G
Microbacterium_sp._T32	1.02201	0.00410778	Mulching/DeepPlowing_N
Candidatus_Brocadia_sp.	-1.02175	0.0204636	Mulching/DeepPlowing_G
Lysobacter_sp._Root983	1.02117	0.0402226	Mulching/DeepPlowing_G
Salinisphaera_shabanensis	1.02072	0.0168368	Mulching/DeepPlowing_G
Lysobacter_enzymogenes	1.01984	0.0470848	Mulching/DeepPlowing_G
Colletotrichum_aenigma	1.01852	0.00264637	Mulching/DeepPlowing_N
Streptomyces_sp._JHA26	1.01759	0.00424429	Mulching/DeepPlowing_G
Acidovorax_sp._106	1.01745	0.034207	Mulching/DeepPlowing_G
Streptomyces_sp._NRRL_F-5630	1.01689	0.00619187	Mulching/DeepPlowing_N
Claviceps_purpurea	1.01613	0.0376442	Mulching/DeepPlowing_G
Nitrospira_sp._ND1	1.01519	0.0117175	Mulching/DeepPlowing_G
Porphyrobacter_sp._YT40	1.01491	0.0223594	Mulching/DeepPlowing_G
Nocardia_thailandica	1.01479	0.0068248	Mulching/DeepPlowing_N
Fusarium_coffeatum	1.01469	0.00396958	Mulching/DeepPlowing_G
uncultured_Acidobacteria_bacterium_cosmid_p2H8	-1.01055	0.0118723	Mulching/DeepPlowing_G
Sphaerotilus_montanus	1.00994	0.037114	Mulching/DeepPlowing_G
Rhizobium_sp._CF258	1.008	0.00749189	Mulching/DeepPlowing_N
Lysobacter_alkalisoli	1.0079	0.0155727	Mulching/DeepPlowing_G
Ophiocordyceps_camponoti-rufipedis	1.00753	0.042259	Mulching/DeepPlowing_N
Luteimonas_sp._LNNU_24178	1.00719	0.0141821	Mulching/DeepPlowing_G
Leptographium_truncatum	1.00693	0.0432095	Mulching/DeepPlowing_G
Acidobacteriia_bacterium_12-62-4	-1.00615	0.0170782	Mulching/DeepPlowing_G
Drechslerella_brochopaga	1.00549	0.0402226	Mulching/DeepPlowing_G
Actinophytocola_algeriensis	1.00539	0.0187059	Mulching/DeepPlowing_N
Chitinophaga_sp._K20C18050901	1.00511	0.00871403	Mulching/DeepPlowing_N
Pseudoxanthomonas_sacheonensis	1.00353	0.0155727	Mulching/DeepPlowing_G
Acidimicrobiales_bacterium	-1.00297	0.0223594	Mulching/DeepPlowing_G
Streptomyces_sp._CNT371	1.00165	0.0421878	Mulching/DeepPlowing_G
Salinibacterium_xinjiangense	1.00067	0.0128993	Mulching/DeepPlowing_N
Isoptericola_dokdonensis	1.00054	0.0439213	Mulching/DeepPlowing_G

## Sheet: species_M_D_2A
Species	log2FoldChange	pValue	Group
Candidatus_Uhrbacteria_bacterium_GW2011_GWD2_52_7	9.16207	0.0171513	Mulching/DeepPlowing_G_2A
Micrococcales_bacterium	8.92813	0.0187577	Mulching/DeepPlowing_G_2A
Neisseriales_bacterium	8.47911	0.00360231	Mulching/DeepPlowing_G_2A
Bdellovibrio_sp._CG10_big_fil_rev_8_21_14_0_10_47_8	7.00674	0.00195507	Mulching/DeepPlowing_G_2A
Aquabacterium_parvum	6.54482	0.000781571	Mulching/DeepPlowing_G_2A
Fluviicola_sp._SGL-29	6.27993	0.0159897	Mulching/DeepPlowing_G_2A
Myoviridae_sp.	6.2203	0.00147011	Mulching/DeepPlowing_G_2A
Bdellovibrio_sp._CG10_big_fil_rev_8_21_14_0_10_47_8	6.15537	0.0244344	Mulching/DeepPlowing_N_2A
Acremonium_chrysogenum	6.10046	0.00275607	Mulching/DeepPlowing_G_2A
Roseovarius_sp._MCTG156(2b)	6.08929	0.0244344	Mulching/DeepPlowing_G_2A
uncultured_bacterium_(gcode_4)	6.04839	0.000960753	Mulching/DeepPlowing_G_2A
Comamonadaceae_bacterium_2PF	5.93858	0.00275607	Mulching/DeepPlowing_G_2A
Cyanobacteria_bacterium_PR.023	5.92506	0.0244344	Mulching/DeepPlowing_G_2A
Roseovarius_sp._BRH_c41	5.65599	0.0141917	Mulching/DeepPlowing_G_2A
Candidatus_Taylorbacteria_bacterium_RIFCSPLOWO2_12_FULL_44_9	5.64979	0.00743216	Mulching/DeepPlowing_G_2A
Agrobacterium_sp.	5.58266	0.00399013	Mulching/DeepPlowing_G_2A
Siphoviridae_sp.	5.48784	0.00107979	Mulching/DeepPlowing_N_2A
Limnohabitans_sp._MMS-10A-192	5.48646	0.00185132	Mulching/DeepPlowing_G_2A
Acidovorax_phage_ACPWH	5.47077	0.0139501	Mulching/DeepPlowing_N_2A
Candidatus_Moranbacteria_bacterium_CG_4_9_14_3_um_filter_45_14	5.46517	0.0338606	Mulching/DeepPlowing_G_2A
bacterium_ADurb.Bin425	5.41146	0.0106129	Mulching/DeepPlowing_G_2A
Candidatus_Uhrbacteria_bacterium_CG22_combo_CG10-13_8_21_14_all_47_17	5.40764	0.0124763	Mulching/DeepPlowing_G_2A
Erysipelotrichia_bacterium	5.35157	0.0216164	Mulching/DeepPlowing_N_2A
Erysipelotrichia_bacterium	5.3505	0.0104046	Mulching/DeepPlowing_G_2A
Roseovarius_sp._EC-SD190	5.30649	0.0203451	Mulching/DeepPlowing_G_2A
Candidatus_Peregrinibacteria_bacterium_GW2011_GWA2_47_7	5.24626	0.00323459	Mulching/DeepPlowing_G_2A
Desulfurellales_bacterium	5.18654	0.00777458	Mulching/DeepPlowing_G_2A
Candidatus_Moranbacteria_bacterium_CG_4_9_14_3_um_filter_45_14	5.11843	0.0139501	Mulching/DeepPlowing_N_2A
Acremonium_chrysogenum	5.09348	0.00399013	Mulching/DeepPlowing_N_2A
Burkholderiales_bacterium_RIFCSPLOWO2_12_FULL_61_40	5.07712	0.0399835	Mulching/DeepPlowing_G_2A
Cyanobacteria_bacterium_DS2.008	5.05914	0.0187577	Mulching/DeepPlowing_G_2A
Sulfurimonas_sp.	5.01583	0.0171513	Mulching/DeepPlowing_G_2A
Diaphorobacter_sp._HDW4B	4.99467	0.0106129	Mulching/DeepPlowing_N_2A
Thauera_sp._27	4.89339	0.0314685	Mulching/DeepPlowing_N_2A
Thermanaeromonas_toyohensis	4.8867	0.0103673	Mulching/DeepPlowing_G_2A
Roseovarius_mucosus	4.82851	0.0141917	Mulching/DeepPlowing_G_2A
Vibrio_parahaemolyticus	4.82288	0.0187577	Mulching/DeepPlowing_G_2A
candidate_division_SR1_bacterium	4.80652	0.00641585	Mulching/DeepPlowing_G_2A
Arcobacter_butzleri	4.6833	0.0210105	Mulching/DeepPlowing_G_2A
Spirochaetes_bacterium_GWB1_59_5	4.65347	0.0314685	Mulching/DeepPlowing_G_2A
Podoviridae_sp._ctviO18	4.65336	0.000960753	Mulching/DeepPlowing_G_2A
Agitococcus_lubricus	4.65048	0.0141917	Mulching/DeepPlowing_G_2A
Candidatus_Moranbacteria_bacterium_GW2011_GWF1_34_10	4.64003	0.0018486	Mulching/DeepPlowing_G_2A
Geosmithia_morbida	4.55994	0.000501632	Mulching/DeepPlowing_G_2A
Comamonadaceae_bacterium_PBBC1	4.54095	0.0314685	Mulching/DeepPlowing_G_2A
Limnohabitans_sp._2KL-1	4.50964	0.00563554	Mulching/DeepPlowing_G_2A
Candidatus_Moranbacteria_bacterium_RIFCSPLOWO2_02_FULL_48_19	4.50253	0.0349299	Mulching/DeepPlowing_G_2A
Caudovirales_GX15bay	4.49457	0.0337003	Mulching/DeepPlowing_N_2A
uncultured_Caudovirales_phage	4.47026	0.0141917	Mulching/DeepPlowing_N_2A
Parcubacteria_group_bacterium_ADurb.Bin216	4.4683	0.0496449	Mulching/DeepPlowing_G_2A
Macromonas_bipunctata	4.4379	0.0339769	Mulching/DeepPlowing_G_2A
Geosmithia_morbida	4.40916	0.0100507	Mulching/DeepPlowing_N_2A
Alphaproteobacteria_bacterium_PA1	4.3843	0.0106129	Mulching/DeepPlowing_G_2A
Neonectria_ditissima	4.38239	0.00195507	Mulching/DeepPlowing_G_2A
Purpureocillium_lilacinum	4.36719	0.000384567	Mulching/DeepPlowing_G_2A
Stenotrophomonas_phage_vB_SmaS-DLP_6	4.34073	0.00469675	Mulching/DeepPlowing_G_2A
Agitococcus_lubricus	4.28372	0.0399835	Mulching/DeepPlowing_N_2A
Klebsiella_quasipneumoniae	4.27706	0.00123406	Mulching/DeepPlowing_G_2A
Betaproteobacteria_bacterium_CG2_30_59_46	4.27581	0.0337003	Mulching/DeepPlowing_G_2A
Candidatus_Komeilibacteria_bacterium_RIFOXYD1_FULL_37_29	4.24081	0.0300267	Mulching/DeepPlowing_G_2A
Polaromonas_sp._W9N	4.22591	0.0338606	Mulching/DeepPlowing_G_2A
Tolypocladium_paradoxum	4.21637	0.000743725	Mulching/DeepPlowing_G_2A
Candidatus_Andersenbacteria_bacterium_RIFCSPHIGHO2_12_FULL_45_11b	4.2124	0.0133838	Mulching/DeepPlowing_G_2A
Parcubacteria_group_bacterium_GW2011_GWA2_36_10	4.20676	0.0018486	Mulching/DeepPlowing_G_2A
Spirochaetia_bacterium	4.19755	0.00275607	Mulching/DeepPlowing_G_2A
Marinobacter_sp._N4	4.16677	0.0339769	Mulching/DeepPlowing_N_2A
Stachybotrys_chartarum	4.1634	0.000787319	Mulching/DeepPlowing_G_2A
Microgenomates_group_bacterium_GW2011_GWF1_44_10	4.16193	0.0210105	Mulching/DeepPlowing_N_2A
Paenibacillus_sp._EKM211P	4.16136	0.0053165	Mulching/DeepPlowing_N_2A
Stachybotrys_chartarum	4.15147	0.00777458	Mulching/DeepPlowing_N_2A
Prokaryotic_dsDNA_virus_sp.	4.14566	0.00563554	Mulching/DeepPlowing_N_2A
uncultured_Caudovirales_phage	4.13236	0.0141917	Mulching/DeepPlowing_G_2A
Spirochaetes_bacterium	4.1228	0.00563554	Mulching/DeepPlowing_G_2A
Burkholderiales_bacterium_PBB4	4.10014	0.00399013	Mulching/DeepPlowing_G_2A
Tolypocladium_paradoxum	4.09208	0.0100507	Mulching/DeepPlowing_N_2A
Tolypocladium_ophioglossoides	4.06627	0.00635079	Mulching/DeepPlowing_G_2A
Tolypocladium_ophioglossoides	4.05134	0.0296561	Mulching/DeepPlowing_N_2A
Salegentibacter_salegens	4.03722	0.0337003	Mulching/DeepPlowing_N_2A
uncultured_bacterium_A1Q1_fos_25	4.03513	0.0139501	Mulching/DeepPlowing_N_2A
Saprospirales_bacterium	4.02173	0.0244344	Mulching/DeepPlowing_G_2A
Chlamydiae_bacterium	4.02125	0.0399835	Mulching/DeepPlowing_G_2A
Comamonadaceae_bacterium_CG17_big_fil_post_rev_8_21_14_2_50_60_13	4.01164	0.00198159	Mulching/DeepPlowing_G_2A
Bacteriovorax_sp._Seq25_V	4.00859	0.0126049	Mulching/DeepPlowing_G_2A
Lentimicrobium_sp.	4.00449	0.0216164	Mulching/DeepPlowing_G_2A
Candidatus_Fonsibacter_lacus	4.00038	0.0229511	Mulching/DeepPlowing_G_2A
Streptomyces_virus_Bing	3.97262	0.0244344	Mulching/DeepPlowing_G_2A
Acidovorax_facilis	3.94031	0.00563554	Mulching/DeepPlowing_G_2A
Acidovorax_sp._HMWF018	3.93466	0.0141917	Mulching/DeepPlowing_G_2A
Candidatus_Latescibacteria_bacterium_ADurb.Bin168	3.93305	0.010286	Mulching/DeepPlowing_G_2A
Prokaryotic_dsDNA_virus_sp.	3.9327	0.0187577	Mulching/DeepPlowing_G_2A
Stachybotrys_chlorohalonata	3.9188	0.00044623	Mulching/DeepPlowing_G_2A
Candidatus_Roizmanbacteria_bacterium_RIFCSPLOWO2_01_FULL_38_12	3.89667	0.0170611	Mulching/DeepPlowing_N_2A
Comamonas_sp._JUb58	3.89275	0.000493624	Mulching/DeepPlowing_G_2A
Verrucomicrobia_bacterium_RIFCSPHIGHO2_12_FULL_41_10	3.88439	0.00563554	Mulching/DeepPlowing_G_2A
Bdellovibrio_bacteriovorus	3.87839	0.0314685	Mulching/DeepPlowing_G_2A
Acinetobacter_sp.	3.87121	0.0244344	Mulching/DeepPlowing_G_2A
Rhodoferax_fermentans	3.85228	0.00777458	Mulching/DeepPlowing_G_2A
Candidatus_Andersenbacteria_bacterium_RIFCSPHIGHO2_12_FULL_45_11	3.83535	0.045811	Mulching/DeepPlowing_G_2A
Parachlamydiales_bacterium	3.80427	0.00794144	Mulching/DeepPlowing_G_2A
Bdellovibrio_sp._SKB1291214	3.80211	0.0300267	Mulching/DeepPlowing_G_2A
Pseudoarcobacter_acticola	3.79068	0.0300267	Mulching/DeepPlowing_G_2A
Streptomyces_fulvorobeus	3.77233	0.0187577	Mulching/DeepPlowing_N_2A
Podoviridae_sp._ctg2L5	3.77017	0.045811	Mulching/DeepPlowing_G_2A
Lewinella_sp._W8	3.75659	0.0133838	Mulching/DeepPlowing_G_2A
Bdellovibrio_sp._CG_4_9_14_3_um_filter_39_7	3.74454	0.0180195	Mulching/DeepPlowing_G_2A
Fusarium_decemcellulare	3.7433	0.000273915	Mulching/DeepPlowing_G_2A
Paludibacter_sp._221	3.72964	0.0371401	Mulching/DeepPlowing_N_2A
Klebsiella_pneumoniae	3.72106	0.0314685	Mulching/DeepPlowing_G_2A
Bacteroides_faecis	3.71608	0.0338606	Mulching/DeepPlowing_G_2A
Parcubacteria_group_bacterium_GW2011_GWA1_40_21	3.66818	0.0385787	Mulching/DeepPlowing_G_2A
Undibacterium_sp._YM2	3.64139	0.0314685	Mulching/DeepPlowing_G_2A
Agrobacterium_sp._ATCC_31749	3.63915	0.01689	Mulching/DeepPlowing_G_2A
Candidatus_Cryosericum_septentrionale	3.63301	0.0421538	Mulching/DeepPlowing_G_2A
Micrococcales_bacterium	3.63074	0.00275607	Mulching/DeepPlowing_N_2A
Podoviridae_sp._ctg2L5	3.62968	0.0322364	Mulching/DeepPlowing_N_2A
Rhodoferax_sp._BLA1	3.62722	0.0106129	Mulching/DeepPlowing_G_2A
Bacteriovorax_sp._BSW11_IV	3.6137	0.0141917	Mulching/DeepPlowing_N_2A
Streptomyces_virus_Bing	3.57384	0.0192211	Mulching/DeepPlowing_N_2A
Maribacter_sp.	3.57222	0.0141917	Mulching/DeepPlowing_G_2A
Chaetomium_globosum	3.57181	0.0244344	Mulching/DeepPlowing_G_2A
Simplicispira_psychrophila	3.56515	0.0104046	Mulching/DeepPlowing_G_2A
Thermothielavioides_terrestris	3.55487	0.0187577	Mulching/DeepPlowing_G_2A
Bacteroidetes_bacterium_ADurb.BinA104	3.5459	0.0314685	Mulching/DeepPlowing_N_2A
Phocaeicola_vulgatus	3.52359	0.00143398	Mulching/DeepPlowing_G_2A
Salmonella_enterica	3.50384	0.0244344	Mulching/DeepPlowing_G_2A
Sphingomonadales_bacterium_28-56-43	3.49592	0.00057874	Mulching/DeepPlowing_G_2A
Rhodocyclaceae_bacterium_SHINM1	3.48083	0.00563554	Mulching/DeepPlowing_G_2A
Streptococcus_pneumoniae	3.4674	0.00399013	Mulching/DeepPlowing_N_2A
Bacteroidetes_bacterium_OLB9	3.46613	0.0106129	Mulching/DeepPlowing_G_2A
Pochonia_chlamydosporia	3.46528	0.00350027	Mulching/DeepPlowing_G_2A
Microgenomates_group_bacterium_GW2011_GWF1_44_10	3.46299	0.0180195	Mulching/DeepPlowing_G_2A
Acidovorax_sp._SD340	3.46115	0.0187577	Mulching/DeepPlowing_N_2A
Candidatus_Pacebacteria_bacterium_CG10_big_fil_rev_8_21_14_0_10_44_11	3.45954	0.0229511	Mulching/DeepPlowing_G_2A
Candidatus_Nomurabacteria_bacterium_CG_4_10_14_0_2_um_filter_30_12	3.45385	0.0153712	Mulching/DeepPlowing_G_2A
Candidatus_Woesebacteria_bacterium_GW2011_GWC1_42_9	3.42	0.0180195	Mulching/DeepPlowing_G_2A
Chitinophagia_bacterium	3.41208	0.00185109	Mulching/DeepPlowing_G_2A
Ralstonia_sp.	3.39755	0.0141917	Mulching/DeepPlowing_G_2A
Fusarium_zealandicum	3.3784	0.0124763	Mulching/DeepPlowing_G_2A
Candidatus_Pelagibacter_sp._TMED64	3.37768	0.0338606	Mulching/DeepPlowing_N_2A
Paludibacter_sp._221	3.36051	0.00622372	Mulching/DeepPlowing_G_2A
Fusarium_albosuccineum	3.34434	0.00567379	Mulching/DeepPlowing_G_2A
Pseudomonas_sp._NFPP05	3.34184	0.0456763	Mulching/DeepPlowing_N_2A
Phaeodactylibacter_luteus	3.33502	0.0337003	Mulching/DeepPlowing_G_2A
Marinobacter_sp._EhC06	3.32682	0.0106129	Mulching/DeepPlowing_G_2A
Sphaerotilus_hippei	3.30007	0.0141917	Mulching/DeepPlowing_G_2A
Porphyrobacter_tepidarius	3.29904	0.0106129	Mulching/DeepPlowing_G_2A
Saprospiraceae_bacterium	3.28887	0.0314685	Mulching/DeepPlowing_G_2A
Bdellovibrionaceae_bacterium	3.27685	0.0314685	Mulching/DeepPlowing_G_2A
Klebsiella_quasipneumoniae	3.2731	0.0106129	Mulching/DeepPlowing_N_2A
Escherichia_coli	3.27117	0.0399835	Mulching/DeepPlowing_G_2A
Mesorhizobium_japonicum	3.25134	0.0244344	Mulching/DeepPlowing_G_2A
Sinorhizobium_phage_phiM6	3.23881	0.0337003	Mulching/DeepPlowing_G_2A
Coniochaeta_ligniaria	3.23696	0.015117	Mulching/DeepPlowing_G_2A
Powellomyces_hirtus	3.21501	0.0345474	Mulching/DeepPlowing_G_2A
Halomonas_sp._hl-4	3.21153	0.0338606	Mulching/DeepPlowing_G_2A
Bacteriovorax_sp._Seq25_V	3.19674	0.0345474	Mulching/DeepPlowing_N_2A
Candidatus_Saccharibacteria_bacterium_RIFCSPHIGHO2_01_FULL_46_30	3.17536	0.0106129	Mulching/DeepPlowing_G_2A
Fusarium_vanettenii	3.17501	0.00057874	Mulching/DeepPlowing_G_2A
Lewinella_cohaerens	3.17008	0.0399835	Mulching/DeepPlowing_G_2A
Comamonas_thiooxydans	3.14544	0.0399835	Mulching/DeepPlowing_G_2A
Chloroflexi_bacterium_RBG_13_53_26	3.12931	0.0369884	Mulching/DeepPlowing_G_2A
Fusarium_oxysporum	3.12901	0.00123406	Mulching/DeepPlowing_G_2A
Delftia_acidovorans	3.12808	0.0399835	Mulching/DeepPlowing_G_2A
Roseovarius_sp._THAF9	3.12482	0.0369884	Mulching/DeepPlowing_G_2A
Tolypocladium_capitatum	3.11907	0.00480135	Mulching/DeepPlowing_G_2A
Proteobacteria_bacterium_SG_bin7	3.11543	0.0314685	Mulching/DeepPlowing_G_2A
Pseudomonas_sp._NFPP05	3.11462	0.00253807	Mulching/DeepPlowing_G_2A
Metarhizium_anisopliae	3.10332	0.00323459	Mulching/DeepPlowing_G_2A
Flavobacteriales_bacterium_33_180_T64	3.10196	0.0418353	Mulching/DeepPlowing_G_2A
Synergistetes_bacterium_ADurb.BinA166	3.10113	0.0314685	Mulching/DeepPlowing_G_2A
bacterium_AMD02	3.098	0.00355146	Mulching/DeepPlowing_G_2A
Candidatus_Pelagibacter_sp._TMED64	3.0975	0.0338606	Mulching/DeepPlowing_G_2A
Candidatus_Kaiserbacteria_bacterium_RIFCSPLOWO2_12_FULL_45_26	3.08559	0.0418353	Mulching/DeepPlowing_G_2A
Bdellovibrionales_bacterium_RIFOXYD1_FULL_36_51	3.08478	0.00355146	Mulching/DeepPlowing_G_2A
Candidatus_Saccharibacteria_bacterium_RIFCSPHIGHO2_01_FULL_46_30	3.07921	0.00185109	Mulching/DeepPlowing_N_2A
Riemerella_anatipestifer	3.06471	0.0203451	Mulching/DeepPlowing_N_2A
Riemerella_anatipestifer	3.05752	0.00267396	Mulching/DeepPlowing_G_2A
Enterobacter_cloacae	3.05534	0.0399835	Mulching/DeepPlowing_G_2A
Coniochaeta_sp._2T2.1	3.04726	0.0187577	Mulching/DeepPlowing_G_2A
Metarhizium_robertsii	3.03841	0.0108604	Mulching/DeepPlowing_N_2A
Candidatus_Nomurabacteria_bacterium_GW2011_GWB1_40_7	3.03779	0.0159897	Mulching/DeepPlowing_G_2A
Burkholderiales_bacterium_PBB3	3.03608	0.0314685	Mulching/DeepPlowing_N_2A
Vibrio_cholerae	3.0334	0.0314685	Mulching/DeepPlowing_G_2A
Okeania_sp._SIO2H7	3.02911	0.0399835	Mulching/DeepPlowing_G_2A
Alicycliphilus_sp._B1	3.0245	0.0244344	Mulching/DeepPlowing_G_2A
Candidatus_Campbellbacteria_bacterium_RIFOXYC2_FULL_35_25	3.02234	0.0385787	Mulching/DeepPlowing_G_2A
Candidatus_Moranbacteria_bacterium_CG_4_8_14_3_um_filter_41_13	3.02208	0.0338606	Mulching/DeepPlowing_G_2A
Duganella_sp._FT50W	3.01839	0.0314685	Mulching/DeepPlowing_G_2A
Marivivens_sp.	3.01596	0.01689	Mulching/DeepPlowing_G_2A
Candidatus_Nomurabacteria_bacterium_RIFCSPLOWO2_02_FULL_41_9	3.00928	0.0290153	Mulching/DeepPlowing_G_2A
Metarhizium_guizhouense	2.99458	0.0203451	Mulching/DeepPlowing_N_2A
Sphingomonadaceae_bacterium_PASS1	2.99122	0.00563554	Mulching/DeepPlowing_G_2A
Leptolyngbyaceae_cyanobacterium_RM2_2_4	2.99049	0.00777458	Mulching/DeepPlowing_G_2A
Elizabethkingia_meningoseptica	2.96401	0.0322364	Mulching/DeepPlowing_G_2A
Candidatus_Saccharibacteria_bacterium_RIFCSPHIGHO2_12_FULL_44_22	2.95937	0.000781571	Mulching/DeepPlowing_N_2A
Bacteroidetes_bacterium_ADurb.Bin041	2.94062	0.00743216	Mulching/DeepPlowing_G_2A
Bradyrhizobium_genosp._SA-3	2.93759	0.0187577	Mulching/DeepPlowing_G_2A
Bdellovibrio_sp._KM01	2.91935	0.0271959	Mulching/DeepPlowing_N_2A
Metarhizium_acridum	2.91467	0.00833652	Mulching/DeepPlowing_N_2A
Porphyrobacter_sp._IPPAS_B-1204	2.91239	0.00563554	Mulching/DeepPlowing_G_2A
Podoviridae_sp._ctka020	2.90941	0.0159897	Mulching/DeepPlowing_N_2A
Sphingorhabdus_rigui	2.89334	0.00777458	Mulching/DeepPlowing_G_2A
Janthinobacterium_sp._B9-8	2.88504	0.0203451	Mulching/DeepPlowing_G_2A
Fusarium_sp._AF-8	2.88311	0.0159897	Mulching/DeepPlowing_G_2A
Candidatus_Saccharibacteria_bacterium_49-20	2.86688	0.0187577	Mulching/DeepPlowing_G_2A
Balneola_sp.	2.86669	0.0106129	Mulching/DeepPlowing_G_2A
Coxiella_burnetii	-2.86647	0.0399835	Mulching/DeepPlowing_N_2A
Bacteroidetes_bacterium_OLB8	2.86254	0.00179035	Mulching/DeepPlowing_G_2A
Polynucleobacter_sp.	2.8535	0.0106129	Mulching/DeepPlowing_G_2A
Delftia_sp._BR1	2.85162	0.0257014	Mulching/DeepPlowing_G_2A
Sulfurimonas_sp._CVO	2.85127	0.0257014	Mulching/DeepPlowing_G_2A
Porphyrobacter_sp._SLTP	2.84684	0.00275607	Mulching/DeepPlowing_G_2A
Omnitrophica_WOR_2_bacterium_RIFCSPHIGHO2_02_FULL_48_11	-2.83072	0.0337003	Mulching/DeepPlowing_G_2A
Morganella_morganii	2.83036	0.0171513	Mulching/DeepPlowing_N_2A
Candidatus_Uhrbacteria_bacterium_GW2011_GWA2_53_10	2.82781	0.0210105	Mulching/DeepPlowing_G_2A
Nitrosomonas_sp._Nm86	2.81498	0.0399835	Mulching/DeepPlowing_G_2A
Rhizobium_sp._BK393	2.80683	0.00833652	Mulching/DeepPlowing_G_2A
bacterium_HR30	-2.80431	0.00275607	Mulching/DeepPlowing_G_2A
Marinobacter_sp._B9-2	2.8033	0.0203451	Mulching/DeepPlowing_G_2A
Hydrogenophaga_sp._D2P1	2.80141	0.00563554	Mulching/DeepPlowing_N_2A
Arcobacter_cloacae	2.79067	0.0139501	Mulching/DeepPlowing_N_2A
Neurospora_tetrasperma	2.78903	0.0314685	Mulching/DeepPlowing_G_2A
Serratia_marcescens	2.78596	0.0106129	Mulching/DeepPlowing_G_2A
Candidatus_Yonathbacteria_bacterium_RIFCSPLOWO2_01_FULL_47_33b	2.78463	0.0299049	Mulching/DeepPlowing_G_2A
Phialemoniopsis_curvata	2.78246	0.0118053	Mulching/DeepPlowing_G_2A
Saccharopolyspora_jiangxiensis	2.77547	0.0314685	Mulching/DeepPlowing_G_2A
Leptolyngbyaceae_cyanobacterium_SM2_5_2	2.77421	0.0214137	Mulching/DeepPlowing_G_2A
Candidatus_Zambryskibacteria_bacterium_RIFCSPLOWO2_12_FULL_39_45	2.77327	0.0496449	Mulching/DeepPlowing_G_2A
Candidatus_Staskawiczbacteria_bacterium_RIFCSPLOWO2_01_FULL_43_17b	2.77024	0.014042	Mulching/DeepPlowing_G_2A
Herminiimonas_sp._CN	2.76359	0.0187577	Mulching/DeepPlowing_G_2A
Fusarium_sarcochroum	2.76191	0.0345474	Mulching/DeepPlowing_G_2A
Psychrobacter_pygoscelis	2.75971	0.0376219	Mulching/DeepPlowing_G_2A
Streptomyces_africanus	2.75897	0.0399835	Mulching/DeepPlowing_N_2A
Sulfurimonas_gotlandica	2.75301	0.0153712	Mulching/DeepPlowing_G_2A
Candidatus_Campbellbacteria_bacterium_RIFCSPLOWO2_02_FULL_35_11	2.75158	0.0445654	Mulching/DeepPlowing_G_2A
Mollicutes_bacterium	2.74594	0.0139501	Mulching/DeepPlowing_G_2A
Candidatus_Andersenbacteria_bacterium_CG10_big_fil_rev_8_21_14_0_10_54_11	2.74563	0.0146492	Mulching/DeepPlowing_G_2A
Psychroserpens_sp.	2.74286	0.000358194	Mulching/DeepPlowing_G_2A
Acidovorax_sp._1608163	2.73933	0.00123406	Mulching/DeepPlowing_G_2A
Candidatus_Uhrbacteria_bacterium_RIFCSPLOWO2_12_FULL_47_9	2.73853	0.00185132	Mulching/DeepPlowing_G_2A
Candidatus_Peregrinibacteria_bacterium_HGW-Peregrinibacteria-1	2.73412	0.0229511	Mulching/DeepPlowing_G_2A
Metarhizium_robertsii	2.732	0.00198159	Mulching/DeepPlowing_G_2A
Parcubacteria_group_bacterium_GW2011_GWB1_56_8	2.73091	0.0314685	Mulching/DeepPlowing_G_2A
Simkaniaceae_bacterium	2.7295	0.0379494	Mulching/DeepPlowing_G_2A
Cloacibacterium_normanense	2.72935	0.0141917	Mulching/DeepPlowing_G_2A
Nonomuraea_sp._SBT364	2.72765	0.0399835	Mulching/DeepPlowing_N_2A
Candidatus_Kerfeldbacteria_bacterium_CG08_land_8_20_14_0_20_40_16	2.72131	0.014042	Mulching/DeepPlowing_G_2A
Candidatus_Roizmanbacteria_bacterium_CG09_land_8_20_14_0_10_41_9	2.71207	0.0132277	Mulching/DeepPlowing_N_2A
Erythromicrobium_ramosum	2.71143	0.0244344	Mulching/DeepPlowing_G_2A
Fusarium_sp._NRRL_66182	2.70725	0.0300267	Mulching/DeepPlowing_G_2A
Xanthomarina_gelatinilytica	2.70469	0.0244344	Mulching/DeepPlowing_N_2A
Malikia_spinosa	2.70459	0.0141917	Mulching/DeepPlowing_G_2A
Streptomyces_sp._EN16	2.70381	0.0170611	Mulching/DeepPlowing_N_2A
Streptomyces_argenteolus	2.69115	0.0187577	Mulching/DeepPlowing_N_2A
Cellulophaga_phage_phi14:2	2.6892	0.0430029	Mulching/DeepPlowing_N_2A
Candidatus_Woesebacteria_bacterium_GWB1_43_5	2.68844	0.0108604	Mulching/DeepPlowing_G_2A
Rikenellaceae_bacterium	2.68706	0.0314685	Mulching/DeepPlowing_G_2A
Chlamydiae_bacterium_CG10_big_fil_rev_8_21_14_0_10_35_9	2.68333	0.00360231	Mulching/DeepPlowing_G_2A
Citrobacter_phage_CVT22	2.67532	0.0291715	Mulching/DeepPlowing_N_2A
Streptomyces_leeuwenhoekii	2.67344	0.00450622	Mulching/DeepPlowing_N_2A
Planctomyces_bekefii	2.67101	0.0214137	Mulching/DeepPlowing_G_2A
Phaeoacremonium_minimum	2.66882	0.0399835	Mulching/DeepPlowing_G_2A
Acidobacteria_bacterium_RBG_16_68_9	-2.66829	0.000287947	Mulching/DeepPlowing_G_2A
Aeromonas_caviae	2.66445	0.00777458	Mulching/DeepPlowing_G_2A
Pseudomonas_phage_JG054	2.65835	0.00465346	Mulching/DeepPlowing_G_2A
Synechococcus_phage_B23	2.65602	0.00196597	Mulching/DeepPlowing_G_2A
Verminephrobacter_aporrectodeae	2.6296	0.0244344	Mulching/DeepPlowing_G_2A
Candidatus_Nomurabacteria_bacterium_RIFCSPLOWO2_01_FULL_41_12	2.62396	0.0420777	Mulching/DeepPlowing_G_2A
Virus_Rctr71	2.62104	0.0338606	Mulching/DeepPlowing_G_2A
Candidatus_Nomurabacteria_bacterium_RIFCSPLOWO2_01_FULL_46_18	2.62001	0.0143436	Mulching/DeepPlowing_G_2A
Candidatus_Taylorbacteria_bacterium_RIFCSPLOWO2_12_FULL_47_20	2.617	0.0338606	Mulching/DeepPlowing_G_2A
Porphyrobacter_sp._HT-58-2	2.61693	0.0187577	Mulching/DeepPlowing_G_2A
Rhizobium_sp._Root149	2.61678	0.00399013	Mulching/DeepPlowing_G_2A
Chlamydiae_bacterium_RIFCSPHIGHO2_12_FULL_49_9	2.6138	0.0399835	Mulching/DeepPlowing_G_2A
Bifidobacterium_longum	2.60298	0.0067849	Mulching/DeepPlowing_G_2A
Fusarium_euwallaceae	2.59608	0.0335742	Mulching/DeepPlowing_G_2A
Providencia_stuartii	2.59574	0.0349299	Mulching/DeepPlowing_G_2A
Candidatus_Kaiserbacteria_bacterium_RIFCSPHIGHO2_12_45_16	2.5944	0.0203451	Mulching/DeepPlowing_G_2A
SR1_bacterium_human_oral_taxon_HOT-345	2.58832	0.0338606	Mulching/DeepPlowing_G_2A
Candidatus_Nomurabacteria_bacterium_RIFOXYD2_FULL_35_12	2.58699	0.0385787	Mulching/DeepPlowing_G_2A
Flavobacterium_aquaticum	2.58482	0.000546515	Mulching/DeepPlowing_G_2A
Bacteriovorax_sp._BAL6_X	2.58331	0.00567379	Mulching/DeepPlowing_G_2A
Arthrobacter_phage_Mimi	2.58049	0.0244344	Mulching/DeepPlowing_N_2A
Flavobacteriaceae_bacterium	2.57645	0.00563554	Mulching/DeepPlowing_G_2A
Candidatus_Saccharibacteria_bacterium_32-50-10	2.57224	0.00185109	Mulching/DeepPlowing_N_2A
Phocaeicola_dorei	2.56684	0.0124763	Mulching/DeepPlowing_N_2A
Metarhizium_guizhouense	2.56604	0.00360816	Mulching/DeepPlowing_G_2A
Candidatus_Andersenbacteria_bacterium	2.5658	0.00777458	Mulching/DeepPlowing_G_2A
Chlamydiales_bacterium_38-26	2.5637	0.0418353	Mulching/DeepPlowing_G_2A
Phormidium_sp._SL48-SHIP	2.56067	0.0143436	Mulching/DeepPlowing_G_2A
Trichoderma_harzianum	2.56047	0.00450622	Mulching/DeepPlowing_G_2A
Pseudoalteromonas_sp.	2.55269	0.0106129	Mulching/DeepPlowing_N_2A
Rhizobium_sp._JKLM12A2	2.54445	0.0199881	Mulching/DeepPlowing_G_2A
Candidatus_Kaiserbacteria_bacterium_RIFOXYD1_FULL_42_15	2.54216	0.0418353	Mulching/DeepPlowing_G_2A
Marinobacter_sp._es.048	2.54183	0.0103673	Mulching/DeepPlowing_G_2A
Podoviridae_sp._ctka020	2.53917	0.00465346	Mulching/DeepPlowing_G_2A
Streptomyces_phage_Gilson	2.53617	0.00258647	Mulching/DeepPlowing_G_2A
Pseudomonas_formosensis	2.51944	0.0337003	Mulching/DeepPlowing_G_2A
Candidatus_Magasanikbacteria_bacterium_CG10_big_fil_rev_8_21_14_0_10_40_10	2.5173	0.0208912	Mulching/DeepPlowing_G_2A
Epulopiscium_sp.	2.50978	0.00275607	Mulching/DeepPlowing_G_2A
Acetobacter_aceti	2.50297	0.0430029	Mulching/DeepPlowing_G_2A
Candidatus_Uhrbacteria_bacterium_RIFCSPLOWO2_12_FULL_47_9	2.49944	0.00635079	Mulching/DeepPlowing_N_2A
Xanthomonas_phage_XacN1	2.49432	0.0331491	Mulching/DeepPlowing_N_2A
Streptomyces_azureus	2.49113	0.0244344	Mulching/DeepPlowing_N_2A
Candidatus_Woesebacteria_bacterium_GW2011_GWB1_38_8	2.49085	0.0257014	Mulching/DeepPlowing_G_2A
Fusarium_beomiforme	2.49062	0.0124763	Mulching/DeepPlowing_G_2A
uncultured_virus	2.48776	0.00185109	Mulching/DeepPlowing_G_2A
Propionicimonas_paludicola	2.47514	0.0496449	Mulching/DeepPlowing_G_2A
Okeania_sp._SIO2F4	2.47262	0.037878	Mulching/DeepPlowing_G_2A
Bifiguratus_adelaidae	2.47091	0.00635079	Mulching/DeepPlowing_G_2A
Metarhizium_rileyi	2.46978	0.0345474	Mulching/DeepPlowing_G_2A
Extensimonas_perlucida	2.46859	0.0271959	Mulching/DeepPlowing_G_2A
Dermatophilaceae_bacterium	2.46634	0.0141917	Mulching/DeepPlowing_N_2A
Comamonas_aquatica	2.46233	0.000287947	Mulching/DeepPlowing_G_2A
Nonomuraea_mesophila	2.45934	0.00777458	Mulching/DeepPlowing_N_2A
Fusarium_avenaceum	2.45391	0.00229507	Mulching/DeepPlowing_N_2A
Thermoanaerobaculia_bacterium	-2.4411	0.00777458	Mulching/DeepPlowing_N_2A
Ruegeria_sp._HKCCA4812	2.4334	0.0229511	Mulching/DeepPlowing_N_2A
Delftia_lacustris	2.42861	0.0103673	Mulching/DeepPlowing_G_2A
Ensifer_sp._MMN_5	2.42726	0.00399013	Mulching/DeepPlowing_N_2A
Tenacibaculum_phage_JQ	2.42683	0.0208858	Mulching/DeepPlowing_G_2A
Chloroflexi_bacterium_RIFCSPLOWO2_02_FULL_71_16	-2.42215	0.00147011	Mulching/DeepPlowing_G_2A
Proteiniphilum_sp._X52	2.41615	0.00966455	Mulching/DeepPlowing_G_2A
Endogone_sp._FLAS-F59071	2.41005	0.00966455	Mulching/DeepPlowing_G_2A
Waddlia_chondrophila	2.41003	0.0203451	Mulching/DeepPlowing_G_2A
Spirochaetes_bacterium_RIFOXYC1_FULL_54_7	2.40647	0.0053165	Mulching/DeepPlowing_G_2A
Flammeovirgaceae_bacterium_TMED32	2.39962	0.00185109	Mulching/DeepPlowing_G_2A
Dysgonomonas_mossii	2.39938	0.0018486	Mulching/DeepPlowing_G_2A
Chloroflexi_bacterium_13_1_40CM_3_70_6	-2.3926	0.00107979	Mulching/DeepPlowing_G_2A
Chromobacterium_violaceum	2.38801	0.00275607	Mulching/DeepPlowing_G_2A
Ferrovum_sp._JA12	2.38635	0.00360816	Mulching/DeepPlowing_G_2A
Sphingobacterium_psychroaquaticum	2.38607	0.0354177	Mulching/DeepPlowing_N_2A
Achromobacter_ruhlandii	2.38315	0.0244344	Mulching/DeepPlowing_G_2A
Streptomyces_phage_RosaAsantewaa	2.37538	0.00563554	Mulching/DeepPlowing_G_2A
Nonomuraea_phyllanthi	2.37514	0.00399013	Mulching/DeepPlowing_N_2A
Marinobacter_sp._es.048	2.3702	0.0271959	Mulching/DeepPlowing_N_2A
Deltaproteobacteria_bacterium_CG2_30_63_29	2.36949	0.0141917	Mulching/DeepPlowing_G_2A
Streptomyces_coeruleorubidus	2.36902	0.00275607	Mulching/DeepPlowing_N_2A
Fusarium_sp._AF-4	2.36898	0.0420777	Mulching/DeepPlowing_N_2A
gamma_proteobacterium_HdN1	2.36878	0.0187577	Mulching/DeepPlowing_G_2A
Arcobacter_thereius	2.36823	0.00794144	Mulching/DeepPlowing_G_2A
Trichoderma_asperellum	2.3632	0.000273915	Mulching/DeepPlowing_G_2A
Synechococcus_phage_B23	2.35946	0.0171513	Mulching/DeepPlowing_N_2A
Lechevalieria_deserti	2.35832	0.00777458	Mulching/DeepPlowing_N_2A
Acidovorax_sp._17-64-282	2.35664	0.0257014	Mulching/DeepPlowing_G_2A
Streptomyces_paradoxus	2.35601	0.037878	Mulching/DeepPlowing_N_2A
Acetobacter_okinawensis	2.35366	0.0338606	Mulching/DeepPlowing_G_2A
TM7_phylum_sp._oral_taxon_346	2.35288	0.00777458	Mulching/DeepPlowing_N_2A
Pseudomonas_aeruginosa	2.35055	0.0141917	Mulching/DeepPlowing_G_2A
Candidatus_Saccharibacteria_bacterium_32-50-13	2.3456	0.00275607	Mulching/DeepPlowing_N_2A
Porphyrobacter_sp._CACIAM_03H1	2.34532	0.0141917	Mulching/DeepPlowing_G_2A
Pseudomonadales_bacterium_RIFCSPLOWO2_12_59_9	2.34289	0.0106129	Mulching/DeepPlowing_G_2A
Candidatus_Woesearchaeota_archaeon_CG_4_10_14_0_2_um_filter_33_13	2.3375	0.0108628	Mulching/DeepPlowing_G_2A
Parcubacteria_group_bacterium_RIFCSPLOWO2_01_FULL_48_18	2.33551	0.0108628	Mulching/DeepPlowing_G_2A
Chloroflexi_bacterium_13_1_20CM_2_70_9	-2.33439	0.00107979	Mulching/DeepPlowing_G_2A
Pedobacter_helvus	2.33414	0.0117204	Mulching/DeepPlowing_G_2A
Fusarium_ambrosium	2.3319	0.0235696	Mulching/DeepPlowing_N_2A
Ralstonia_mannitolilytica	2.32929	0.00399013	Mulching/DeepPlowing_G_2A
Marinobacter_vinifirmus	2.32649	0.0314685	Mulching/DeepPlowing_G_2A
Chloroflexi_bacterium_RIFCSPLOWO2_12_FULL_71_12	-2.32092	0.00198698	Mulching/DeepPlowing_G_2A
Haliscomenobacter_hydrossis	2.31819	0.0141917	Mulching/DeepPlowing_G_2A
Coniochaeta_pulveracea	2.3168	0.00563554	Mulching/DeepPlowing_G_2A
Candidatus_Saccharibacteria_bacterium_32-50-10	2.31602	0.0106129	Mulching/DeepPlowing_G_2A
Sphaerotilus_hippei	2.31393	0.0141917	Mulching/DeepPlowing_N_2A
Shewanella_sp._CG18_big_fil_WC_8_21_14_2_50_42_11	2.31154	0.00350027	Mulching/DeepPlowing_G_2A
Candidatus_Saccharimonas_sp.	2.30538	0.00355146	Mulching/DeepPlowing_N_2A
Nonomuraea_typhae	2.30261	0.0187577	Mulching/DeepPlowing_G_2A
Nitratifractor_salsuginis	2.30169	0.0133838	Mulching/DeepPlowing_G_2A
Iodobacter_sp._H11R3	2.29969	0.0106129	Mulching/DeepPlowing_G_2A
Candidatus_Hydrogenedentes_bacterium_ADurb.Bin101	2.29894	0.00593046	Mulching/DeepPlowing_G_2A
Streptomyces_sp._JB150	2.29695	0.0244344	Mulching/DeepPlowing_N_2A
Sulfurimonas_gotlandica	2.29559	0.0379494	Mulching/DeepPlowing_N_2A
Fluviicoccus_keumensis	2.29382	0.0399835	Mulching/DeepPlowing_G_2A
Marinobacter_sp._DSM_26671	2.29297	0.00363499	Mulching/DeepPlowing_G_2A
Saccharothrix_sp._NRRL_B-16314	2.29042	0.0244344	Mulching/DeepPlowing_N_2A
Streptomyces_phage_LibertyBell	2.28585	0.0337003	Mulching/DeepPlowing_G_2A
Chloroflexi_bacterium_13_1_40CM_4_68_4	-2.28536	0.000287947	Mulching/DeepPlowing_G_2A
Candidatus_Saccharibacteria_bacterium_32-49-12	2.28281	0.000781571	Mulching/DeepPlowing_G_2A
Chloroflexi_bacterium_13_1_40CM_68_21	-2.28073	0.0141917	Mulching/DeepPlowing_N_2A
Gramella_sp.	2.2797	0.0053165	Mulching/DeepPlowing_G_2A
Porphyrobacter_colymbi	2.27837	0.0314685	Mulching/DeepPlowing_G_2A
Fusarium_heterosporum	2.27622	0.00483039	Mulching/DeepPlowing_G_2A
Paucibacter_aquatile	2.27609	0.0141917	Mulching/DeepPlowing_G_2A
Undibacterium_parvum	2.27442	0.0244344	Mulching/DeepPlowing_N_2A
Halomonadaceae_bacterium_R4HLG17	2.2732	0.00616675	Mulching/DeepPlowing_G_2A
Acidithiobacillus_thiooxidans	2.27217	0.00360231	Mulching/DeepPlowing_G_2A
Candidatus_Saccharibacteria_bacterium_oral_taxon_488	2.27194	0.000401039	Mulching/DeepPlowing_N_2A
Bacteroides_fragilis	2.27086	0.0053165	Mulching/DeepPlowing_G_2A
uncultured_crenarchaeote_57a5	-2.26933	0.00803887	Mulching/DeepPlowing_G_2A
Burkholderia_sp._BE12	2.26694	0.0139501	Mulching/DeepPlowing_G_2A
Tenacibaculum_sp.	2.26683	0.000164541	Mulching/DeepPlowing_G_2A
Bacillus_cellulosilyticus	2.26487	0.0018486	Mulching/DeepPlowing_G_2A
Chryseobacterium_sp._ON_d1	2.26229	0.0271325	Mulching/DeepPlowing_G_2A
Nocardiopsis_ganjiahuensis	2.26217	0.00323459	Mulching/DeepPlowing_N_2A
Helicobacteraceae_bacterium	2.26183	0.014177	Mulching/DeepPlowing_G_2A
uncultured_bacterium_lac121	-2.25984	0.00355146	Mulching/DeepPlowing_G_2A
Rhodococcus_sp._15-649-2-2	2.2585	0.0018486	Mulching/DeepPlowing_G_2A
Fusarium_austroafricanum	2.25645	0.0379494	Mulching/DeepPlowing_G_2A
Chloroflexi_bacterium_13_1_40CM_67_9	-2.25521	0.00198698	Mulching/DeepPlowing_G_2A
Chryseobacterium_sp.	2.25381	0.0399835	Mulching/DeepPlowing_N_2A
Caulobacter_sp.	2.25084	0.0314685	Mulching/DeepPlowing_G_2A
Candidatus_Lloydbacteria_bacterium_RIFCSPHIGHO2_02_FULL_50_13	2.24906	0.0345474	Mulching/DeepPlowing_G_2A
Streptomyces_phage_Muntaha	2.24827	0.0187577	Mulching/DeepPlowing_G_2A
Porphyrobacter_donghaensis	2.24789	0.0244344	Mulching/DeepPlowing_G_2A
Chloroflexi_bacterium_13_1_40CM_68_21	-2.24762	0.00107979	Mulching/DeepPlowing_G_2A
Nonomuraea_sp._NN258	2.24538	0.0187577	Mulching/DeepPlowing_N_2A
Candidatus_Lloydbacteria_bacterium_RIFCSPLOWO2_02_FULL_54_12	2.24266	0.0165499	Mulching/DeepPlowing_G_2A
Chloroflexi_bacterium_GWC2_70_10	-2.2424	0.000781571	Mulching/DeepPlowing_G_2A
Hymenobacter_rigui	2.23984	0.0322364	Mulching/DeepPlowing_G_2A
Candidatus_Peregrinibacteria_bacterium_CG_4_9_14_0_2_um_filter_53_11	2.23843	0.00743216	Mulching/DeepPlowing_G_2A
Trichoderma_longibrachiatum	2.23785	0.0468914	Mulching/DeepPlowing_N_2A
Marseillevirus_LCMAC102	2.23739	0.0335742	Mulching/DeepPlowing_G_2A
Actinobacteria_bacterium_OV320	2.23642	0.0026255	Mulching/DeepPlowing_N_2A
Chryseobacterium_sp._OV715	2.23641	0.0159315	Mulching/DeepPlowing_N_2A
candidate_division_WWE3_bacterium_RIFOXYD1_FULL_39_9	2.23451	0.0235696	Mulching/DeepPlowing_G_2A
Acidovorax_sp._T1	2.23283	0.00120417	Mulching/DeepPlowing_G_2A
Streptomyces_swartbergensis	2.23041	4.11353e-05	Mulching/DeepPlowing_N_2A
Xylella_fastidiosa	2.22965	0.00185109	Mulching/DeepPlowing_G_2A
Erythrobacteraceae_bacterium	2.22829	0.0399835	Mulching/DeepPlowing_G_2A
Pseudomonas_songnenensis	2.22618	0.0314685	Mulching/DeepPlowing_N_2A
Negativicutes_bacterium	2.22184	0.0229511	Mulching/DeepPlowing_G_2A
Fervidobacterium_sp.	2.21595	0.00480135	Mulching/DeepPlowing_N_2A
Halobacteriovorax_sp._DA5	2.21477	0.0229511	Mulching/DeepPlowing_G_2A
Fusarium_sp._AF-6	2.21331	0.00774841	Mulching/DeepPlowing_G_2A
Cordyceps_javanica	2.2109	0.00664093	Mulching/DeepPlowing_G_2A
Neisseria_meningitidis	2.21064	0.0018486	Mulching/DeepPlowing_G_2A
Chryseobacterium_indologenes	2.20796	0.0331491	Mulching/DeepPlowing_G_2A
Candidatus_Saccharibacteria_bacterium_32-50-13	2.20792	0.0399835	Mulching/DeepPlowing_G_2A
Streptomyces_ossamyceticus	2.20776	0.0399835	Mulching/DeepPlowing_G_2A
Planctomycetes_bacterium_RBG_16_64_10	2.20588	0.0399835	Mulching/DeepPlowing_G_2A
Bacteroides_ovatus	2.20539	0.00845504	Mulching/DeepPlowing_G_2A
Microbacterium_phage_Triscuit	2.20285	0.0106129	Mulching/DeepPlowing_N_2A
Paraburkholderia_rhynchosiae	2.19978	0.00275607	Mulching/DeepPlowing_N_2A
Bradyrhizobium_genosp._SA-3	2.19708	0.0187577	Mulching/DeepPlowing_N_2A
Candidatus_Falkowbacteria_bacterium_HGW-Falkowbacteria-2	2.19382	0.00641585	Mulching/DeepPlowing_G_2A
Achromobacter_piechaudii	2.19292	0.0133708	Mulching/DeepPlowing_G_2A
Phocaeicola_dorei	2.19262	0.0208858	Mulching/DeepPlowing_G_2A
Candidatus_Saccharibacteria_bacterium_GW2011_GWC2_48_9	2.19158	0.000781571	Mulching/DeepPlowing_N_2A
Saccharopolyspora_shandongensis	2.19014	0.00185109	Mulching/DeepPlowing_N_2A
Colletotrichum_truncatum	2.18596	0.00195507	Mulching/DeepPlowing_G_2A
Nitrospira_sp._CR1.3	-2.17972	0.0314685	Mulching/DeepPlowing_N_2A
Streptomyces_sp._CNQ329	-2.17664	0.0026661	Mulching/DeepPlowing_G_2A
Cellulomonas_timonensis	2.17488	0.0322364	Mulching/DeepPlowing_G_2A
Sciscionella_sp._SE31	2.17076	0.0269581	Mulching/DeepPlowing_G_2A
Streptomyces_sp._NBRC_110035	2.17052	0.0103673	Mulching/DeepPlowing_N_2A
Nitratifractor_salsuginis	2.17031	0.036411	Mulching/DeepPlowing_N_2A
Acidobacteria_bacterium_RBG_16_68_9	-2.17006	0.00777458	Mulching/DeepPlowing_N_2A
Streptomyces_sp._NRRL_F-6602	2.1663	0.00803887	Mulching/DeepPlowing_N_2A
Gallicola_sp.	2.1622	0.045811	Mulching/DeepPlowing_N_2A
Cordyceps_sp._RAO-2017	2.16111	0.000161001	Mulching/DeepPlowing_G_2A
Candidatus_Saccharibacteria_bacterium_47-87	2.15958	0.0271959	Mulching/DeepPlowing_G_2A
Candidatus_Saccharibacteria_bacterium_49-20	2.15815	0.00185109	Mulching/DeepPlowing_N_2A
Phocaeicola_plebeius	2.15721	0.00363499	Mulching/DeepPlowing_G_2A
Thaumarchaeota_archaeon	-2.15627	0.00399013	Mulching/DeepPlowing_G_2A
Pantoea_brenneri	2.15474	0.047584	Mulching/DeepPlowing_G_2A
Candidatus_Komeilibacteria_bacterium_RIFCSPLOWO2_01_FULL_52_15	2.15395	0.0053165	Mulching/DeepPlowing_G_2A
Comamonas_testosteroni	2.14927	0.00399013	Mulching/DeepPlowing_G_2A
Nonomuraea_fuscirosea	2.14623	0.0314685	Mulching/DeepPlowing_N_2A
Isoptericola_halotolerans	2.14621	0.00275607	Mulching/DeepPlowing_N_2A
Negativicutes_bacterium	2.14157	0.0322364	Mulching/DeepPlowing_N_2A
Rhodobacteraceae_bacterium_Water-Bin34	2.14138	0.0184658	Mulching/DeepPlowing_N_2A
Metarhizium_album	2.1408	0.0117204	Mulching/DeepPlowing_G_2A
Pseudomonas_virus_PaMx25	2.13806	0.00057874	Mulching/DeepPlowing_G_2A
Streptomyces_sp.	2.13732	0.0187577	Mulching/DeepPlowing_N_2A
Streptomyces_phage_Blueeyedbeauty	2.13722	0.00845504	Mulching/DeepPlowing_G_2A
Croceibacter_phage_P2559S	2.13717	0.0139501	Mulching/DeepPlowing_N_2A
Candidatus_Saccharimonas_aalborgensis	2.13591	0.000781571	Mulching/DeepPlowing_N_2A
Massilia_sp._CCM_8734	2.1322	0.0244344	Mulching/DeepPlowing_G_2A
Chitinophaga_sp._YR573	2.1315	0.00563554	Mulching/DeepPlowing_N_2A
Methylobacterium_sp._XJLW	2.13041	0.0300267	Mulching/DeepPlowing_G_2A
Paenibacillus_sambharensis	2.12848	0.0304245	Mulching/DeepPlowing_G_2A
Pseudomonas_trivialis	2.12813	0.0159315	Mulching/DeepPlowing_G_2A
Streptomyces_sp._SID7499	2.12461	0.0106129	Mulching/DeepPlowing_N_2A
Fusarium_poae	2.12322	0.00833652	Mulching/DeepPlowing_G_2A
Nonomuraea_terrae	2.123	0.0244344	Mulching/DeepPlowing_N_2A
Streptomyces_qaidamensis	2.12242	0.00399013	Mulching/DeepPlowing_N_2A
Akkermansia_muciniphila	2.1217	0.0108604	Mulching/DeepPlowing_G_2A
Bacillus_subtilis	2.1199	0.0418353	Mulching/DeepPlowing_G_2A
Parachlamydiaceae_bacterium_HS-T3	2.11732	0.00794144	Mulching/DeepPlowing_G_2A
Lewinella_litorea	2.11594	0.00622372	Mulching/DeepPlowing_G_2A
Phycomyces_blakesleeanus	2.11529	0.0264844	Mulching/DeepPlowing_N_2A
Acinetobacter_junii	2.11159	0.000743725	Mulching/DeepPlowing_G_2A
Blyttiomyces_helicus	2.10877	0.0104046	Mulching/DeepPlowing_G_2A
Arthrobacter_phage_Brad	2.10851	0.0244344	Mulching/DeepPlowing_G_2A
Planktothrix_paucivesiculata	2.10747	0.0264844	Mulching/DeepPlowing_G_2A
Nonomuraea_rhodomycinica	2.10712	0.00563554	Mulching/DeepPlowing_N_2A
Arthrobacter_silvisoli	-2.10659	0.00123406	Mulching/DeepPlowing_G_2A
Pseudomonas_virus_PaMx74	2.10606	0.0338606	Mulching/DeepPlowing_N_2A
Streptomyces_phage_Moab	2.09942	0.00777458	Mulching/DeepPlowing_G_2A
Xanthomonas_phage_PPDBI	2.09871	0.00845504	Mulching/DeepPlowing_G_2A
Dictyoglomus_turgidum	2.09667	0.0159897	Mulching/DeepPlowing_G_2A
Betaproteobacteria_bacterium_RIFCSPLOWO2_02_64_14	-2.09248	0.000287947	Mulching/DeepPlowing_G_2A
Bacillus_cereus	2.09144	0.0141917	Mulching/DeepPlowing_N_2A
Pusillimonas_sp._7-48	2.08859	0.00794144	Mulching/DeepPlowing_G_2A
Candidatus_Nephrothrix_sp._EaCA	2.086	0.000781571	Mulching/DeepPlowing_N_2A
Fervidobacterium_sp.	2.07982	0.00530044	Mulching/DeepPlowing_G_2A
Bifidobacterium_longum	2.07932	0.0132277	Mulching/DeepPlowing_N_2A
Rhodobacteraceae_bacterium_Water-Bin34	2.07853	0.045356	Mulching/DeepPlowing_G_2A
Trichoderma_citrinoviride	2.07721	0.00057874	Mulching/DeepPlowing_G_2A
Streptosporangium_canum	2.07085	0.00777458	Mulching/DeepPlowing_N_2A
uncultured_Acidobacteria_bacterium_cosmid_p2H8	-2.06855	0.00147011	Mulching/DeepPlowing_G_2A
Parachlamydiaceae_bacterium	2.06645	0.0244344	Mulching/DeepPlowing_G_2A
Azotobacter_vinelandii	2.06399	0.0244344	Mulching/DeepPlowing_G_2A
Porphyrobacter_sp._TH134	2.06385	0.0187577	Mulching/DeepPlowing_G_2A
Treponema_sp._GWB1_62_6	2.06332	0.0053165	Mulching/DeepPlowing_G_2A
Chryseobacterium_sp._POL2	2.0626	0.0139501	Mulching/DeepPlowing_G_2A
Syncephalastrum_racemosum	2.06161	0.027555	Mulching/DeepPlowing_G_2A
Enterococcus_hirae	2.05981	0.0108604	Mulching/DeepPlowing_G_2A
Trichoderma_virens	2.05833	0.00267396	Mulching/DeepPlowing_G_2A
Pseudanabaena_sp._PCC_7367	2.05717	0.0106129	Mulching/DeepPlowing_G_2A
Thaumarchaeota_archaeon_13_1_40CM_2_39_4	-2.0571	0.00469675	Mulching/DeepPlowing_G_2A
Hydrotalea_sp._AMD	2.0563	0.0159897	Mulching/DeepPlowing_G_2A
Streptomyces_sp._NRRL_S-378	2.05564	0.00563554	Mulching/DeepPlowing_N_2A
Nitrososphaera_sp._AFS	-2.05505	0.00469675	Mulching/DeepPlowing_G_2A
Mucor_lusitanicus	2.05346	0.0338606	Mulching/DeepPlowing_G_2A
Gallicola_sp.	2.05254	0.027555	Mulching/DeepPlowing_G_2A
Actinobacteria_bacterium_RBG_19FT_COMBO_70_19	-2.05224	0.00185109	Mulching/DeepPlowing_G_2A
Bilophila_wadsworthia	2.04986	0.0053165	Mulching/DeepPlowing_G_2A
Fusarium_avenaceum	2.04913	0.00057874	Mulching/DeepPlowing_G_2A
Acidovorax_sp._SCN_65-28	2.04892	0.00400046	Mulching/DeepPlowing_N_2A
Alphaproteobacteria_bacterium_HGW-Alphaproteobacteria-9	2.04767	0.0187577	Mulching/DeepPlowing_G_2A
Kitasatospora_phosalacinea	2.04655	0.0421538	Mulching/DeepPlowing_N_2A
Aeromonas_veronii	2.04331	0.0106129	Mulching/DeepPlowing_G_2A
Nonomuraea_coxensis	2.03974	0.0399835	Mulching/DeepPlowing_N_2A
Staphylococcus_haemolyticus	2.03808	0.047584	Mulching/DeepPlowing_N_2A
Lewinella_aquimaris	2.03532	0.0103673	Mulching/DeepPlowing_G_2A
Sphingobacteriales_bacterium_39-19	2.03476	0.00774841	Mulching/DeepPlowing_G_2A
Candidatus_Daviesbacteria_bacterium_RIFCSPLOWO2_02_FULL_38_15	2.03394	0.0290153	Mulching/DeepPlowing_N_2A
Photobacterium_sanctipauli	2.03263	0.0053165	Mulching/DeepPlowing_G_2A
Candidatus_Magasanikbacteria_bacterium_GW2011_GWA2_45_39	2.03242	0.014042	Mulching/DeepPlowing_G_2A
Flavobacteriaceae_bacterium_TMED42	2.03004	0.0338606	Mulching/DeepPlowing_G_2A
Candidatus_Aminicenantes_bacterium_ADurb.Bin508	2.02736	0.00833652	Mulching/DeepPlowing_G_2A
Candidatus_Nomurabacteria_bacterium_RIFCSPLOWO2_12_40_14	2.02647	0.0053165	Mulching/DeepPlowing_G_2A
Propionicimonas_paludicola	2.02579	0.00616675	Mulching/DeepPlowing_N_2A
Candidatus_Roizmanbacteria_bacterium_GW2011_GWA2_36_23	2.02401	0.0214137	Mulching/DeepPlowing_N_2A
Comamonas_sp._26	2.02328	0.0235696	Mulching/DeepPlowing_G_2A
Nitrospira_sp._KM1	-2.02282	0.0314685	Mulching/DeepPlowing_N_2A
Sphingobacterium_mizutaii	2.02013	0.0143436	Mulching/DeepPlowing_G_2A
Streptomyces_griseus	2.01744	0.00275607	Mulching/DeepPlowing_N_2A
Nitrosopumilales_archaeon	-2.01638	0.00563554	Mulching/DeepPlowing_G_2A
Streptomyces_sp._BK161	2.01387	0.0106129	Mulching/DeepPlowing_N_2A
Flavobacterium_rakeshii	-2.01246	0.045356	Mulching/DeepPlowing_G_2A
Hydrogenophaga_sp._A37	2.01209	0.00185109	Mulching/DeepPlowing_G_2A
Streptomyces_wuyuanensis	2.01172	0.0106129	Mulching/DeepPlowing_G_2A
Actinopolyspora_halophila	2.01161	0.0269581	Mulching/DeepPlowing_N_2A
Hydrotalea_sp._AMD	2.00874	0.0257014	Mulching/DeepPlowing_N_2A
Limnohabitans_sp._Hippo4	2.00836	0.00399013	Mulching/DeepPlowing_G_2A
Staphylococcus_haemolyticus	2.00788	0.00057874	Mulching/DeepPlowing_G_2A
Streptomyces_qaidamensis	2.00762	0.0242675	Mulching/DeepPlowing_G_2A
Mycobacterium_phage_Onyinye	2.00648	0.045811	Mulching/DeepPlowing_G_2A
Candidatus_Saccharibacteria_bacterium_RAAC3_TM7_1	2.00612	0.00399013	Mulching/DeepPlowing_N_2A
Curtobacterium_sp._MCBD17_030	2.00583	0.0271325	Mulching/DeepPlowing_N_2A
uncultured_crenarchaeote	-2.00566	0.00563554	Mulching/DeepPlowing_G_2A
Freshwater_phage_uvFW-CGR-AMD-COM-C203	2.0056	0.0420777	Mulching/DeepPlowing_N_2A
Sinorhizobium_meliloti	2.00555	0.0399835	Mulching/DeepPlowing_N_2A
Rhizobium_sp._J15	2.00212	0.0171513	Mulching/DeepPlowing_G_2A
Lachnospiraceae_bacterium	1.99921	0.00123406	Mulching/DeepPlowing_G_2A
Rhodoferax_sp._YR267	1.99904	0.00563554	Mulching/DeepPlowing_G_2A
Streptomyces_paludis	1.99872	0.00635079	Mulching/DeepPlowing_N_2A
Streptomyces_sp._SMS_SU21	1.9971	0.018664	Mulching/DeepPlowing_N_2A
Variovorax_sp._BK151	1.9963	0.00563554	Mulching/DeepPlowing_G_2A
Bacteroidetes_bacterium_4484_276	1.996	0.0308817	Mulching/DeepPlowing_G_2A
Streptomyces_phage_CricKo	1.99324	0.0314685	Mulching/DeepPlowing_N_2A
Coprinellus_angulatus	1.993	0.0053165	Mulching/DeepPlowing_G_2A
Saccharothrix_texasensis	1.98955	0.00777458	Mulching/DeepPlowing_N_2A
Bacteroides_cellulosilyticus	1.98948	0.00967768	Mulching/DeepPlowing_G_2A
Fusarium_sp._AF-4	1.98935	0.0018486	Mulching/DeepPlowing_G_2A
Nitrospira_japonica	-1.98927	0.0187577	Mulching/DeepPlowing_N_2A
Streptomyces_sp._AVP053U2	1.98873	0.00275607	Mulching/DeepPlowing_N_2A
Candidatus_Magasanikbacteria_bacterium_CG10_big_fil_rev_8_21_14_0_10_40_10	1.98811	0.045356	Mulching/DeepPlowing_N_2A
Parcubacteria_group_bacterium_GW2011_GWA1_33_6	1.98749	0.0338606	Mulching/DeepPlowing_N_2A
Fusarium_culmorum	1.98733	0.0399835	Mulching/DeepPlowing_N_2A
Bacteroides_clarus	1.98549	0.00345089	Mulching/DeepPlowing_G_2A
Chromobacterium_violaceum	1.98306	0.00275607	Mulching/DeepPlowing_N_2A
Nonomuraea_deserti	1.98219	0.0314685	Mulching/DeepPlowing_N_2A
Chloroflexi_bacterium_13_1_40CM_2_70_6	-1.97875	0.0026255	Mulching/DeepPlowing_G_2A
Chloroflexi_bacterium_13_1_40CM_2_70_6	-1.97848	0.0244344	Mulching/DeepPlowing_N_2A
Sodiomyces_alkalinus	1.97755	0.000960753	Mulching/DeepPlowing_G_2A
Candidatus_Nitrosocosmicus_franklandus	-1.97747	0.00399013	Mulching/DeepPlowing_G_2A
Candidatus_Nitrosocosmicus_oleophilus	-1.9773	0.00563554	Mulching/DeepPlowing_G_2A
Xylella_fastidiosa	1.97617	0.00275607	Mulching/DeepPlowing_N_2A
Fusarium_ambrosium	1.97529	0.0108628	Mulching/DeepPlowing_G_2A
Candidatus_Saccharibacteria_bacterium_HGW-Saccharibacteria-1	1.9731	0.000287947	Mulching/DeepPlowing_N_2A
Candidatus_Nitrososphaera_evergladensis	-1.97074	0.00399013	Mulching/DeepPlowing_G_2A
Saccharothrix_sp._NRRL_B-16348	1.97054	0.0244344	Mulching/DeepPlowing_N_2A
Mycobacterium_sp._OK887	1.97043	0.00267396	Mulching/DeepPlowing_N_2A
Pontibacter_sp._2b14	1.96767	0.0187577	Mulching/DeepPlowing_G_2A
Ralstonia_virus_RSL1	1.96682	0.0338606	Mulching/DeepPlowing_N_2A
Microdochium_bolleyi	1.96518	0.0236102	Mulching/DeepPlowing_N_2A
Colletotrichum_plurivorum	1.96471	0.027555	Mulching/DeepPlowing_N_2A
Candidatus_Amesbacteria_bacterium_GW2011_GWC2_47_8	1.96448	0.0456763	Mulching/DeepPlowing_N_2A
Streptomyces_phage_Circinus	1.96233	0.0496449	Mulching/DeepPlowing_G_2A
Candidatus_Saccharibacteria_bacterium_47-87	1.96064	0.00399013	Mulching/DeepPlowing_N_2A
Chlamydiales_bacterium_STE3	1.95908	0.00622372	Mulching/DeepPlowing_G_2A
Salinisphaera_shabanensis	1.95703	0.0132277	Mulching/DeepPlowing_G_2A
Nitrosomonas_sp._Nm120	1.9563	0.0496449	Mulching/DeepPlowing_G_2A
Candidatus_Nitrososphaera_gargensis	-1.95486	0.00185109	Mulching/DeepPlowing_G_2A
uncultured_crenarchaeote_76h13	-1.9537	0.00399013	Mulching/DeepPlowing_G_2A
Candidatus_Roizmanbacteria_bacterium_CG_4_8_14_3_um_filter_36_12	1.94809	0.0354177	Mulching/DeepPlowing_N_2A
Porphyrobacter_dokdonensis	1.9454	0.0187577	Mulching/DeepPlowing_G_2A
Streptomyces_phage_RosaAsantewaa	1.94501	0.000781571	Mulching/DeepPlowing_N_2A
Freshwater_phage_uvFW-CGR-AMD-COM-C203	1.94426	0.0420777	Mulching/DeepPlowing_G_2A
Polynucleobacter_yangtzensis	1.94191	0.0227205	Mulching/DeepPlowing_G_2A
Metarhizium_brunneum	1.94182	0.0180195	Mulching/DeepPlowing_N_2A
Nitrososphaera_viennensis	-1.94138	0.00355146	Mulching/DeepPlowing_G_2A
Kitasatospora_niigatensis	1.9401	0.0133708	Mulching/DeepPlowing_N_2A
bacterium_HR12	-1.93824	0.00275607	Mulching/DeepPlowing_G_2A
Tenericutes_bacterium_ADurb.Bin239	1.93462	0.0445654	Mulching/DeepPlowing_G_2A
Nonomuraea_zeae	1.93377	0.0399835	Mulching/DeepPlowing_N_2A
Candidatus_Desulfosporosinus_infrequens	1.92888	0.0271959	Mulching/DeepPlowing_N_2A
Fluviicola_sp._RIFCSPHIGHO2_12_FULL_43_24	1.92773	0.0106129	Mulching/DeepPlowing_G_2A
Candidatus_Moranbacteria_bacterium_RIFOXYA12_FULL_35_19	1.92712	0.0271325	Mulching/DeepPlowing_G_2A
Didymosphaeria_enalia	1.92707	0.0244344	Mulching/DeepPlowing_G_2A
Betaproteobacteria_bacterium_ADurb.Bin341	1.92659	0.0244344	Mulching/DeepPlowing_G_2A
Kitasatospora_viridis	1.92648	0.0399835	Mulching/DeepPlowing_G_2A
Burkholderia_virus_KL1	1.92616	0.00133923	Mulching/DeepPlowing_G_2A
Torrubiella_hemipterigena	1.92601	0.000631355	Mulching/DeepPlowing_G_2A
Microbacterium_phage_Hiddenleaf	1.92576	0.0141917	Mulching/DeepPlowing_G_2A
Candidatus_Taylorbacteria_bacterium_RIFCSPHIGHO2_01_FULL_51_15	1.9239	0.0290153	Mulching/DeepPlowing_G_2A
Microbulbifer_sp._HZ11	1.92333	0.0106129	Mulching/DeepPlowing_N_2A
Herbaspirillum_sp._CAH-3	1.92159	0.0117204	Mulching/DeepPlowing_G_2A
Nitrososphaera_sp.	-1.92098	0.00399013	Mulching/DeepPlowing_G_2A
Thermus_brockianus	1.91893	0.0401464	Mulching/DeepPlowing_G_2A
Candidatus_Micrarchaeota_archaeon_CG08_land_8_20_14_0_20_59_11	1.91439	0.0193625	Mulching/DeepPlowing_G_2A
Bacillus_mobilis	1.91353	0.0100507	Mulching/DeepPlowing_G_2A
bacterium_ADurb.Bin363	1.91339	0.0159897	Mulching/DeepPlowing_G_2A
Acidithiobacillus_ferrivorans	1.91308	0.0159897	Mulching/DeepPlowing_G_2A
Streptomyces_himastatinicus	1.91281	0.00803887	Mulching/DeepPlowing_N_2A
Candidatus_Peregrinibacteria_bacterium_RIFOXYC2_FULL_33_13	1.91154	0.0229511	Mulching/DeepPlowing_G_2A
Streptomyces_parvus	1.91128	0.014042	Mulching/DeepPlowing_N_2A
Candidatus_Nitrosocosmicus_arcticus	-1.91116	0.00616675	Mulching/DeepPlowing_G_2A
Burkholderiales_bacterium_28-67-8	1.91096	0.00563554	Mulching/DeepPlowing_G_2A
Candidatus_Rokubacteria_bacterium_GWF2_70_14	-1.91019	0.000493624	Mulching/DeepPlowing_G_2A
Amycolatopsis_orientalis	1.91012	0.00399013	Mulching/DeepPlowing_N_2A
Arthrobacter_phage_Shrooms	1.91006	0.00664093	Mulching/DeepPlowing_N_2A
[Clostridium]_ultunense	-1.90841	0.00198698	Mulching/DeepPlowing_G_2A
Verrucomicrobia_bacterium_21-51-4	1.90696	0.0139501	Mulching/DeepPlowing_G_2A
Stenotrophomonas_phage_vB_SmaS-DLP_6	1.90347	0.0269581	Mulching/DeepPlowing_N_2A
Acidovorax_sp._106	1.90298	0.00777458	Mulching/DeepPlowing_G_2A
Monosporascus_sp._5C6A	1.90268	0.00429977	Mulching/DeepPlowing_G_2A
Cellulomonas_hominis	1.90076	0.0141917	Mulching/DeepPlowing_G_2A
Chryseobacterium_taklimakanense	1.90009	0.000384567	Mulching/DeepPlowing_G_2A
Alkanindiges_sp._H1	1.89919	0.0120418	Mulching/DeepPlowing_G_2A
bacterium_SCN_57-13	-1.89745	0.00563554	Mulching/DeepPlowing_G_2A
Candidatus_Nitrosocosmicus_exaquare	-1.89707	0.00616675	Mulching/DeepPlowing_G_2A
Streptomyces_sp._WAC_01529	1.8968	0.0106129	Mulching/DeepPlowing_N_2A
Mycobacteroides_chelonae	1.89544	0.00538664	Mulching/DeepPlowing_G_2A
Nonomuraea_rubra	1.8946	0.0106129	Mulching/DeepPlowing_N_2A
Blastomonas_fulva	1.89457	0.018664	Mulching/DeepPlowing_G_2A
Kiritimatiellaceae_bacterium	1.89354	0.0314685	Mulching/DeepPlowing_G_2A
Nonomuraea_turkmeniaca	1.89293	0.0244344	Mulching/DeepPlowing_N_2A
Candidatus_Magasanikbacteria_bacterium_RIFCSPHIGHO2_01_FULL_47_8	1.89283	0.014042	Mulching/DeepPlowing_G_2A
Schizosaccharomyces_octosporus	1.8915	0.0338606	Mulching/DeepPlowing_N_2A
Nocardiopsis_ganjiahuensis	1.88909	0.0193625	Mulching/DeepPlowing_G_2A
uncultured_crenarchaeote_29d5	-1.88661	0.00803887	Mulching/DeepPlowing_G_2A
Candidatus_Rokubacteria_bacterium_GWC2_70_24	-1.88646	0.00198698	Mulching/DeepPlowing_G_2A
Streptomyces_glaucescens	1.88587	0.0269581	Mulching/DeepPlowing_N_2A
Nonomuraea_candida	1.88463	0.00185109	Mulching/DeepPlowing_N_2A
Streptomyces_sp._2BBP-J2	1.88391	0.00399013	Mulching/DeepPlowing_N_2A
Xanthomonas_sp._35Y	1.88354	0.0399835	Mulching/DeepPlowing_N_2A
Rhodococcus_fascians	1.88348	0.0104046	Mulching/DeepPlowing_N_2A
Candidatus_Saccharibacteria_bacterium_RAAC3_TM7_1	1.88321	0.015117	Mulching/DeepPlowing_G_2A
Streptomyces_echinatus	1.88273	0.0236102	Mulching/DeepPlowing_N_2A
Streptomyces_sp._wa22	1.88083	0.0124763	Mulching/DeepPlowing_N_2A
Streptomyces_sp._FxanaA7	1.87831	0.0244344	Mulching/DeepPlowing_N_2A
Marinimicrobium_sp.	1.87811	0.0399835	Mulching/DeepPlowing_N_2A
Erythrobacter_sp.	1.87805	0.0187577	Mulching/DeepPlowing_G_2A
Candidatus_Nitrosocosmicus_sp.	-1.8768	0.00185109	Mulching/DeepPlowing_G_2A
Candidatus_Saccharibacteria_bacterium_RIFCSPLOWO2_01_FULL_48_13	1.8766	0.00616675	Mulching/DeepPlowing_N_2A
Candidatus_Saccharibacteria_bacterium_CG10_big_fil_rev_8_21_14_0_10_41_32	1.87301	0.0187577	Mulching/DeepPlowing_N_2A
Synechocystis_sp._CACIAM_05	1.87147	0.0331491	Mulching/DeepPlowing_G_2A
Halomonas_organivorans	1.87086	0.0401464	Mulching/DeepPlowing_G_2A
Massilia_plicata	1.87085	0.0187577	Mulching/DeepPlowing_G_2A
Erythrobacteraceae_bacterium_CCH12-C2	1.86823	0.00777458	Mulching/DeepPlowing_G_2A
Porphyrobacter_sp._YT40	1.86748	0.0244344	Mulching/DeepPlowing_G_2A
Brevundimonas_sp._357	1.86601	0.0133708	Mulching/DeepPlowing_G_2A
Candidatus_Uhrbacteria_bacterium_CG_4_10_14_0_2_um_filter_41_21	1.86591	0.0139501	Mulching/DeepPlowing_G_2A
Eoetvoesia_caeni	1.86571	0.0257014	Mulching/DeepPlowing_G_2A
Sphingomonas_sp._Leaf16	1.86476	0.00777458	Mulching/DeepPlowing_G_2A
Streptomyces_sp._Z38	1.86293	0.0141917	Mulching/DeepPlowing_N_2A
Smittium_culicis	1.86289	0.0203451	Mulching/DeepPlowing_G_2A
Chloroflexales_bacterium	-1.86194	0.00777458	Mulching/DeepPlowing_N_2A
Corticibacter_populi	1.86189	0.0314685	Mulching/DeepPlowing_G_2A
Algicola_sp.	1.85979	0.0314685	Mulching/DeepPlowing_G_2A
Streptomyces_filamentosus	1.85945	0.00616675	Mulching/DeepPlowing_N_2A
Lentzea_guizhouensis	1.85825	0.00123406	Mulching/DeepPlowing_N_2A
Thaumarchaeota_archaeon_13_1_40CM_3_50_5	-1.85738	0.00198698	Mulching/DeepPlowing_G_2A
Pseudomonas_helleri	1.85709	0.00450622	Mulching/DeepPlowing_G_2A
Nonomuraea_wenchangensis	1.85672	0.00275607	Mulching/DeepPlowing_N_2A
Acidovorax_sp._FJL06	1.85505	0.0314685	Mulching/DeepPlowing_G_2A
Nocardioides_sp._ZJ1313	1.85348	0.0244344	Mulching/DeepPlowing_G_2A
Acidovorax_avenae	1.85328	0.0399835	Mulching/DeepPlowing_G_2A
Parcubacteria_group_bacterium_RIFOXYD2_FULL_52_8	1.85275	0.0053165	Mulching/DeepPlowing_G_2A
Nonomuraea_sp._KC401	1.85122	0.0187577	Mulching/DeepPlowing_N_2A
Caulobacter_phage_RW	1.85088	0.00966455	Mulching/DeepPlowing_N_2A
uncultured_Acidobacteria_bacterium_A12	-1.84926	0.00803887	Mulching/DeepPlowing_G_2A
Moorella_sp._E308F	1.84859	0.0369884	Mulching/DeepPlowing_N_2A
Acidovorax_sp._JMULE5	1.84848	0.000493624	Mulching/DeepPlowing_G_2A
Pseudodesulfovibrio_sp._JC047	1.84742	0.0271325	Mulching/DeepPlowing_G_2A
Rhizobium_sp._Leaf262	1.8474	0.0199881	Mulching/DeepPlowing_G_2A
Euhalothece_sp._KZN_001	1.84473	0.0146492	Mulching/DeepPlowing_G_2A
Euryarchaeota_archaeon_RBG_19FT_COMBO_69_17	-1.84122	0.0026661	Mulching/DeepPlowing_G_2A
cyanobiont_of_Ornithocercus_magnificus	1.84047	0.014042	Mulching/DeepPlowing_G_2A
Microbacterium_sp._67-17	1.83891	0.010286	Mulching/DeepPlowing_G_2A
Streptomyces_sp._ADI98-10	1.83856	0.0141917	Mulching/DeepPlowing_N_2A
Scedosporium_apiospermum	1.8385	0.018664	Mulching/DeepPlowing_G_2A
Acidobacteria_bacterium_RIFCSPLOWO2_12_FULL_67_14b	-1.8377	0.00275607	Mulching/DeepPlowing_G_2A
Streptomyces_sp._rh34	1.83656	0.00399013	Mulching/DeepPlowing_N_2A
Porphyrobacter_sp._HL-46	1.83593	0.0187577	Mulching/DeepPlowing_G_2A
Candidatus_Rokubacteria_bacterium_GWA2_70_23	-1.83561	0.000493624	Mulching/DeepPlowing_G_2A
Candidatus_Peregrinibacteria_bacterium_CG10_big_fil_rev_8_21_14_0_10_49_10	1.8347	0.0456763	Mulching/DeepPlowing_G_2A
Micromonospora_sp._HM134	1.83442	0.0141917	Mulching/DeepPlowing_G_2A
Bacillus_toyonensis	1.83432	0.0244344	Mulching/DeepPlowing_N_2A
Rhizobium_sp._Root1220	1.83409	0.00185109	Mulching/DeepPlowing_N_2A
Ottowia_sp._Marseille-P4747	1.83367	0.00825594	Mulching/DeepPlowing_G_2A
Candidatus_Falkowbacteria_bacterium_RIFOXYC2_FULL_47_12	1.83029	0.00845504	Mulching/DeepPlowing_G_2A
Nonomuraea_jabiensis	1.82992	0.0399835	Mulching/DeepPlowing_N_2A
Fusarium_acutatum	1.82925	0.0218189	Mulching/DeepPlowing_N_2A
Oleibacter_marinus	1.82869	0.00483039	Mulching/DeepPlowing_G_2A
Roseivirga_spongicola	1.82673	0.0187577	Mulching/DeepPlowing_N_2A
Alteromonas_australica	1.82657	0.00622372	Mulching/DeepPlowing_G_2A
Nitrososphaeraceae_archaeon	-1.82377	0.00563554	Mulching/DeepPlowing_G_2A
Flavonifractor_plautii	1.82246	0.00363499	Mulching/DeepPlowing_G_2A
Thalassospira_marina	1.82134	0.0314685	Mulching/DeepPlowing_G_2A
Verticillium_longisporum	1.81879	0.00198159	Mulching/DeepPlowing_G_2A
Agaricus_bisporus	1.81779	0.0244344	Mulching/DeepPlowing_N_2A
Candidatus_Rokubacteria_bacterium_RIFCSPHIGHO2_12_FULL_73_22	-1.81677	0.00107979	Mulching/DeepPlowing_G_2A
EBPR_siphovirus_2	1.81474	0.00635079	Mulching/DeepPlowing_G_2A
Candidatus_Rokubacteria_bacterium_13_2_20CM_69_15_1	-1.8146	0.00563554	Mulching/DeepPlowing_G_2A
Pyrinomonadaceae_bacterium	-1.81447	0.00123406	Mulching/DeepPlowing_G_2A
Candidatus_Rokubacteria_bacterium_RIFCSPLOWO2_02_FULL_71_18	-1.81354	0.00563554	Mulching/DeepPlowing_G_2A
Deltaproteobacteria_bacterium_RIFCSPLOWO2_12_55_13	-1.80944	0.000164541	Mulching/DeepPlowing_G_2A
Verrucomicrobia_bacterium_A1	1.80552	0.00123406	Mulching/DeepPlowing_G_2A
uncultured_proteobacterium	1.80447	0.037878	Mulching/DeepPlowing_N_2A
Trichoderma_longibrachiatum	1.80292	0.0456763	Mulching/DeepPlowing_G_2A
Dinoroseobacter_sp.	1.80274	0.036411	Mulching/DeepPlowing_G_2A
Deltaproteobacteria_bacterium_RIFCSPLOWO2_12_FULL_60_16	-1.80148	0.000287947	Mulching/DeepPlowing_G_2A
Hymenobacter_rigui	1.80126	0.0339769	Mulching/DeepPlowing_N_2A
Thermoanaerobacterium_sp._PSU-2	1.8009	0.0338606	Mulching/DeepPlowing_G_2A
Alcanivorax_sp._MD8A	1.79965	0.0067849	Mulching/DeepPlowing_G_2A
Actinopolyspora_halophila	1.79959	0.00774841	Mulching/DeepPlowing_G_2A
Streptomyces_phage_Circinus	1.79959	0.0216164	Mulching/DeepPlowing_N_2A
Nonomuraea_sp._160415	1.79833	0.0244344	Mulching/DeepPlowing_N_2A
Comamonadaceae_bacterium_BICA1-1	1.79588	0.0139501	Mulching/DeepPlowing_G_2A
Candidatus_Poseidoniales_archaeon	1.7957	0.0314685	Mulching/DeepPlowing_G_2A
Treponema_endosymbiont_of_Eucomonympha_sp.	1.7952	0.0338606	Mulching/DeepPlowing_N_2A
Rhodococcus_virus_Pepy6	1.79303	0.00096194	Mulching/DeepPlowing_N_2A
Deltaproteobacteria_bacterium_GWA2_57_13	-1.79253	0.000164541	Mulching/DeepPlowing_G_2A
Actinobacteria_bacterium_13_1_40CM_2_66_13	-1.79149	0.0026661	Mulching/DeepPlowing_G_2A
Nitrososphaerales_archaeon	-1.79142	0.0106129	Mulching/DeepPlowing_G_2A
Candidatus_Bathyarchaeota_archaeon_RBG_13_38_9	-1.78894	0.00563554	Mulching/DeepPlowing_G_2A
Candidatus_Wallbacteria_bacterium_HGW-Wallbacteria-1	1.78808	0.0257014	Mulching/DeepPlowing_G_2A
Streptomyces_chrestomyceticus	1.78643	0.0271325	Mulching/DeepPlowing_N_2A
Thermotogaceae_bacterium	1.78616	0.0421538	Mulching/DeepPlowing_G_2A
Microbacterium_phage_Triscuit	1.78507	0.0468311	Mulching/DeepPlowing_G_2A
Pseudomassariella_vexata	1.78483	0.00120417	Mulching/DeepPlowing_G_2A
Streptomyces_sp._NBRC_109706	1.78464	0.0132277	Mulching/DeepPlowing_G_2A
Rarobacter_faecitabidus	1.78445	0.00241539	Mulching/DeepPlowing_N_2A
Synechococcus_sp._UTEX_2973	1.78362	0.0235898	Mulching/DeepPlowing_G_2A
Blautia_obeum	1.78339	0.0236102	Mulching/DeepPlowing_N_2A
Streptomyces_sp._111WW2	1.78333	0.0430029	Mulching/DeepPlowing_G_2A
Candidatus_Saccharibacteria_bacterium_32-49-10	1.7832	0.000781571	Mulching/DeepPlowing_N_2A
Bacteroides_thetaiotaomicron	1.78252	0.0235898	Mulching/DeepPlowing_G_2A
Arthrospira_platensis	1.78088	0.0106129	Mulching/DeepPlowing_G_2A
Agrobacterium_rubi	1.78035	0.00777458	Mulching/DeepPlowing_G_2A
Candidatus_Rokubacteria_bacterium_GWC2_70_16	-1.78021	0.000781571	Mulching/DeepPlowing_G_2A
Nonomuraea_gerenzanensis	1.7772	0.00563554	Mulching/DeepPlowing_N_2A
Bdellovibrionales_bacterium_RIFCSPHIGHO2_02_FULL_40_15	1.77712	0.0141917	Mulching/DeepPlowing_G_2A
Colwellia_sp._MB3u-4	1.77646	0.0430029	Mulching/DeepPlowing_G_2A
Flavobacteriales_bacterium_TMED228	1.7764	0.0018486	Mulching/DeepPlowing_G_2A
Croceibacter_phage_P2559S	1.77461	0.0338606	Mulching/DeepPlowing_G_2A
Chlamydiae_bacterium_SM23_39	1.77458	0.0371401	Mulching/DeepPlowing_G_2A
Betaproteobacteria_bacterium_RIFCSPLOWO2_02_67_12	-1.77301	0.000781571	Mulching/DeepPlowing_G_2A
Streptomyces_sp._Akac8	1.77245	0.0296561	Mulching/DeepPlowing_N_2A
Leeuwenhoekiella_sp._ZYFB001	1.77227	0.0296561	Mulching/DeepPlowing_G_2A
Sinorhizobium_phage_phiM6	1.77177	0.00275607	Mulching/DeepPlowing_N_2A
Nitrospira_sp._CR1.3	-1.77092	0.00275607	Mulching/DeepPlowing_G_2A
Candidatus_Nomurabacteria_bacterium_RIFCSPLOWO2_01_FULL_37_49	1.77067	0.0139501	Mulching/DeepPlowing_N_2A
Metarhizium_majus	1.76958	0.0354177	Mulching/DeepPlowing_G_2A
Hypoxylon_sp._EC38	1.76949	0.027555	Mulching/DeepPlowing_N_2A
Thiomonas_sp._CB3	1.7668	0.0399835	Mulching/DeepPlowing_G_2A
Variovorax_sp._BK151	1.76672	0.00803887	Mulching/DeepPlowing_N_2A
Candidatus_Rokubacteria_bacterium_RIFCSPLOWO2_12_FULL_71_19	-1.76653	0.00185109	Mulching/DeepPlowing_G_2A
Rhodococcus_virus_Poco6	1.76584	0.0133838	Mulching/DeepPlowing_G_2A
Candidatus_Rokubacteria_bacterium_13_1_40CM_69_96	-1.76438	0.00198698	Mulching/DeepPlowing_G_2A
Lewinella_sp._4G2	1.76352	0.0018486	Mulching/DeepPlowing_G_2A
Pseudomonas_phage_PaMx42	1.76242	0.0139501	Mulching/DeepPlowing_G_2A
Deinococcus_wulumuqiensis	1.75927	0.0379494	Mulching/DeepPlowing_G_2A
Candidatus_Rokubacteria_bacterium_RBG_16_73_20	-1.7592	0.00123406	Mulching/DeepPlowing_G_2A
Acinetobacter_indicus	1.75705	0.00450622	Mulching/DeepPlowing_G_2A
Candidatus_Rokubacteria_bacterium	-1.75676	0.00123406	Mulching/DeepPlowing_G_2A
Streptomyces_sp._JHA19	1.75603	0.0141917	Mulching/DeepPlowing_N_2A
Streptomyces_phage_Blueeyedbeauty	1.7543	0.0269581	Mulching/DeepPlowing_N_2A
Chloroflexi_bacterium_13_1_40CM_4_69_19	-1.75363	0.00355146	Mulching/DeepPlowing_G_2A
Streptomyces_sp._CC71	1.75352	0.0108604	Mulching/DeepPlowing_N_2A
Paucibacter_oligotrophus	1.7531	0.0399835	Mulching/DeepPlowing_G_2A
Parcubacteria_group_bacterium_ADurb.Bin316	1.75258	0.045356	Mulching/DeepPlowing_G_2A
Methylosinus_sp._sav-2	1.74977	0.045356	Mulching/DeepPlowing_G_2A
Gymnopus_androsaceus	1.74938	0.00635079	Mulching/DeepPlowing_G_2A
Streptomyces_sp._P3	1.74876	0.00635079	Mulching/DeepPlowing_N_2A
Dictyobacter_aurantiacus	-1.74861	0.00123406	Mulching/DeepPlowing_G_2A
Chitinophaga_sancti	1.74616	0.0244344	Mulching/DeepPlowing_G_2A
Sphingobium_sp._YR768	1.74472	0.0244344	Mulching/DeepPlowing_G_2A
Acidobacteria_bacterium_13_1_40CM_3_55_6	-1.74457	0.00123406	Mulching/DeepPlowing_G_2A
Arthrobacter_sp._MYb211	1.74433	0.0379494	Mulching/DeepPlowing_N_2A
Chitinophaga_flava	1.74301	0.000781571	Mulching/DeepPlowing_N_2A
uncultured_actinobacterium_Rifle_16ft_4_minimus_38826	-1.74235	0.00275607	Mulching/DeepPlowing_G_2A
Deltaproteobacteria_bacterium_RIFCSPLOWO2_12_FULL_60_19	-1.74226	0.000287947	Mulching/DeepPlowing_G_2A
Streptomyces_nigra	1.74111	0.0192211	Mulching/DeepPlowing_N_2A
Betaproteobacteria_bacterium_RIFCSPLOWO2_12_FULL_62_13	-1.74074	0.000493624	Mulching/DeepPlowing_G_2A
Eubacterium_sp.	1.74013	0.00185132	Mulching/DeepPlowing_G_2A
Clostridiaceae_bacterium	1.73937	0.0314685	Mulching/DeepPlowing_G_2A
Verticillium_dahliae	1.73903	0.00323459	Mulching/DeepPlowing_G_2A
Saccharothrix_saharensis	1.73881	0.0314685	Mulching/DeepPlowing_N_2A
Nocardioides_sp._SLBN-35	1.7377	0.00399013	Mulching/DeepPlowing_G_2A
Nonomuraea_sp._WAC_01424	1.73572	0.00777458	Mulching/DeepPlowing_N_2A
Delftia_sp._13_1_40CM_3_66_6	1.73537	0.0108628	Mulching/DeepPlowing_G_2A
Acidobacterium_sp.	-1.73409	0.00275607	Mulching/DeepPlowing_G_2A
Pontiella_desulfatans	1.73326	0.00777458	Mulching/DeepPlowing_G_2A
Golovinomyces_magnicellulatus	1.73297	0.0139501	Mulching/DeepPlowing_G_2A
Streptomyces_sp._alain-838	1.73293	0.00743216	Mulching/DeepPlowing_N_2A
Candidatus_Daviesbacteria_bacterium_RIFCSPLOWO2_02_FULL_43_11	1.73165	0.0338606	Mulching/DeepPlowing_G_2A
Klenkia_marina	1.7304	0.0218189	Mulching/DeepPlowing_G_2A
Streptomyces_sp._CC53	1.72762	0.000781571	Mulching/DeepPlowing_N_2A
Massilia_sp._LC238	1.72734	0.00399013	Mulching/DeepPlowing_G_2A
Metarhizium_brunneum	1.72712	0.0018486	Mulching/DeepPlowing_G_2A
Chengkuizengella_sp._YPA3-1-1	1.72643	0.0108604	Mulching/DeepPlowing_G_2A
Erythrobacter_sp._HI0028	1.7251	0.0399835	Mulching/DeepPlowing_G_2A
Rhizobium_rosettiformans	1.72493	0.00794144	Mulching/DeepPlowing_N_2A
Acidovorax_sp._JS42	1.72411	0.0187577	Mulching/DeepPlowing_G_2A
Nitrosomonadales_bacterium_skT11	1.72374	0.0187577	Mulching/DeepPlowing_G_2A
Leeuwenhoekiella_sp._ZYFB001	1.7219	0.00241539	Mulching/DeepPlowing_N_2A
Paenibacillus_silvae	1.7208	0.0345474	Mulching/DeepPlowing_G_2A
Saccharopolyspora_jiangxiensis	1.7208	0.0244344	Mulching/DeepPlowing_N_2A
Candidatus_Roizmanbacteria_bacterium_RIFCSPLOWO2_01_FULL_44_13	1.71989	0.00363499	Mulching/DeepPlowing_N_2A
Candidatus_Anoxychlamydiales_bacterium	1.71948	0.0104046	Mulching/DeepPlowing_G_2A
Porphyrobacter_sanguineus	1.7177	0.0244344	Mulching/DeepPlowing_G_2A
bacterium_BMS3Bbin02	-1.71714	0.000493624	Mulching/DeepPlowing_G_2A
Candidatus_Saccharibacteria_bacterium	1.7167	0.000781571	Mulching/DeepPlowing_N_2A
Gordonia_sihwensis	1.71659	0.0257014	Mulching/DeepPlowing_G_2A
Stackebrandtia_endophytica	1.71604	0.0106129	Mulching/DeepPlowing_N_2A
Fusarium_fujikuroi	1.71571	0.0053165	Mulching/DeepPlowing_G_2A
Methylococcaceae_bacterium_TMED69	1.71536	0.000960753	Mulching/DeepPlowing_G_2A
Pseudomonas_sp._IzPS43_3003	-1.71405	0.00123406	Mulching/DeepPlowing_G_2A
Micromonospora_maritima	1.71349	0.00563554	Mulching/DeepPlowing_G_2A
Polaromonas_sp.	1.7108	0.0399835	Mulching/DeepPlowing_G_2A
Gordonia_phage_Rickmore	1.70993	0.0016442	Mulching/DeepPlowing_N_2A
Alkalinema_sp._RU_4_3	1.70718	0.00275607	Mulching/DeepPlowing_G_2A
Dysgonomonas_alginatilytica	1.70666	0.0349299	Mulching/DeepPlowing_G_2A
Candidatus_Jorgensenbacteria_bacterium	1.7049	0.0208912	Mulching/DeepPlowing_G_2A
Cellulomonas_hominis	1.70368	0.0244344	Mulching/DeepPlowing_N_2A
Betaproteobacteria_bacterium_RIFCSPLOWO2_12_FULL_62_58	-1.70351	0.000781571	Mulching/DeepPlowing_G_2A
Sulfuricurvum_sp._IAE1	1.70311	0.0139501	Mulching/DeepPlowing_G_2A
Chlamydiae_bacterium_RIFCSPHIGHO2_02_FULL_49_29	1.70232	0.0227205	Mulching/DeepPlowing_G_2A
Leptolyngbyaceae_cyanobacterium_SL_1_1	1.70173	0.00803887	Mulching/DeepPlowing_G_2A
Rhodococcus_fascians	1.69997	0.037878	Mulching/DeepPlowing_G_2A
Isoptericola_sp._TLY-12	1.69845	0.00777458	Mulching/DeepPlowing_N_2A
Verrucosispora_sp._NA02020	1.69782	0.0114161	Mulching/DeepPlowing_G_2A
Gordonia_phage_OhMyWard	1.69774	0.00254545	Mulching/DeepPlowing_N_2A
Candidatus_Saccharimonas_sp.	1.69762	0.0216164	Mulching/DeepPlowing_G_2A
Oleiphilus_messinensis	1.69662	0.0244344	Mulching/DeepPlowing_G_2A
Streptomyces_sp._NRRL_S-146	1.69647	0.0399835	Mulching/DeepPlowing_N_2A
Candidatus_Tectomicrobia_bacterium_RIFCSPLOWO2_12_FULL_69_37	-1.69588	0.000493624	Mulching/DeepPlowing_G_2A
Chloroflexus_sp._Y-396-1	-1.69587	0.00399013	Mulching/DeepPlowing_N_2A
Sphingobacterium_multivorum	1.69573	0.0322364	Mulching/DeepPlowing_G_2A
Sphingomonadales_bacterium_GWF1_63_6	1.6949	0.0104046	Mulching/DeepPlowing_N_2A
Candidatus_Protochlamydia_amoebophila	1.69444	0.0257014	Mulching/DeepPlowing_G_2A
Bacteroidetes_bacterium_GWF2_40_14	1.69434	0.0265857	Mulching/DeepPlowing_G_2A
Mycobacterium_sp._OK887	1.69322	0.00493457	Mulching/DeepPlowing_G_2A
Rhodococcus_virus_Poco6	1.69257	0.00355146	Mulching/DeepPlowing_N_2A
Marinobacter_pelagius	1.68915	0.0296561	Mulching/DeepPlowing_G_2A
Candidatus_Rokubacteria_bacterium_13_1_20CM_4_70_13	-1.68864	0.00355146	Mulching/DeepPlowing_G_2A
Chlamydiae_bacterium_RIFCSPHIGHO2_12_FULL_49_11	1.68863	0.0108628	Mulching/DeepPlowing_G_2A
Bacteroidetes_bacterium_ADurb.Bin141	1.68811	0.0399835	Mulching/DeepPlowing_G_2A
Deltaproteobacteria_bacterium_13_1_40CM_4_54_4	-1.6876	0.00107979	Mulching/DeepPlowing_G_2A
Candidatus_Rokubacteria_bacterium_RIFCSPLOWO2_12_FULL_71_22	-1.68734	0.00123406	Mulching/DeepPlowing_G_2A
Candidatus_Nitrosocosmicus_sp._SS	-1.68647	0.00563554	Mulching/DeepPlowing_G_2A
Zoogloea_sp._LCSB751	1.68576	0.0399835	Mulching/DeepPlowing_G_2A
Deltaproteobacteria_bacterium_RIFCSPLOWO2_02_56_12	-1.68537	0.000164541	Mulching/DeepPlowing_G_2A
Streptomyces_tricolor	1.68449	0.0192211	Mulching/DeepPlowing_N_2A
Chloroflexales_bacterium	-1.68207	8.22707e-05	Mulching/DeepPlowing_G_2A
Candidatus_Rokubacteria_bacterium_13_1_40CM_2_70_45	-1.68196	0.00803887	Mulching/DeepPlowing_G_2A
Pseudomonas_fluvialis	1.67866	0.0187577	Mulching/DeepPlowing_G_2A
Neochlamydia_sp._S13	1.67759	0.0379494	Mulching/DeepPlowing_G_2A
Streptomyces_wuyuanensis	1.67484	0.00123406	Mulching/DeepPlowing_N_2A
Streptomyces_phage_FidgetOrca	1.67424	0.0214137	Mulching/DeepPlowing_N_2A
Candidatus_Heimdallarchaeota_archaeon	1.67421	0.00350027	Mulching/DeepPlowing_G_2A
Candidatus_Rokubacteria_bacterium_13_2_20CM_69_15_2	-1.6737	0.00123406	Mulching/DeepPlowing_N_2A
Candidatus_Rokubacteria_bacterium_13_2_20CM_69_15_2	-1.67287	0.00469675	Mulching/DeepPlowing_G_2A
Acidovorax_sp._Root267	1.67212	0.0399835	Mulching/DeepPlowing_G_2A
Erythrobacter_sp._NAP1	1.67029	0.0141917	Mulching/DeepPlowing_G_2A
Candidatus_Pacebacteria_bacterium_RIFCSPLOWO2_01_FULL_47_12	1.66966	0.036411	Mulching/DeepPlowing_G_2A
Streptomyces_olivochromogenes	1.66923	0.0187577	Mulching/DeepPlowing_N_2A
Candidatus_Rokubacteria_bacterium_RIFCSPLOWO2_12_FULL_69_21	-1.66831	0.000781571	Mulching/DeepPlowing_G_2A
Streptomyces_sp._111WW2	1.66751	0.00794144	Mulching/DeepPlowing_N_2A
Streptomyces_scabiei	1.66713	0.0399835	Mulching/DeepPlowing_N_2A
Candidatus_Nephrothrix_sp._EaCA	1.66636	0.0314685	Mulching/DeepPlowing_G_2A
Lewinella_sp._SSH13	1.66633	0.000781571	Mulching/DeepPlowing_G_2A
Nitrospira_sp._KM1	-1.66545	0.00275607	Mulching/DeepPlowing_G_2A
Chloroflexus_sp._Y-396-1	-1.66401	0.00123406	Mulching/DeepPlowing_G_2A
Cupriavidus_metallidurans	1.66231	0.0106129	Mulching/DeepPlowing_N_2A
Nitrosopumilus_sp._b1	-1.66205	0.00355146	Mulching/DeepPlowing_G_2A
Nonomuraea_endophytica	1.661	0.00275607	Mulching/DeepPlowing_N_2A
Candidatus_Rokubacteria_bacterium_RIFCSPLOWO2_02_FULL_72_37	-1.66082	0.00185109	Mulching/DeepPlowing_G_2A
Microdochium_bolleyi	1.66081	0.045356	Mulching/DeepPlowing_G_2A
Candidatus_Rokubacteria_bacterium_13_1_20CM_2_70_7	-1.66073	0.00777458	Mulching/DeepPlowing_G_2A
Bifidobacterium_scaligerum	1.66062	0.0018486	Mulching/DeepPlowing_G_2A
Candidatus_Rokubacteria_bacterium_13_1_40CM_4_69_5	-1.65975	0.00185109	Mulching/DeepPlowing_G_2A
Chitinophaga_sp._MD30	1.65768	0.0106129	Mulching/DeepPlowing_N_2A
Candidatus_Omnitrophica_bacterium_CG11_big_fil_rev_8_21_14_0_20_63_9	-1.65763	0.00185109	Mulching/DeepPlowing_G_2A
Alphaproteobacteria_bacterium_HGW-Alphaproteobacteria-7	1.65741	0.0187577	Mulching/DeepPlowing_G_2A
Streptomonospora_salina	1.65681	0.0245421	Mulching/DeepPlowing_G_2A
Candidatus_Paracaedibacter_acanthamoebae	1.65605	0.0468311	Mulching/DeepPlowing_G_2A
Pseudophaeobacter_arcticus	1.65574	0.0026255	Mulching/DeepPlowing_G_2A
Deltaproteobacteria_bacterium_CG2_30_66_27	-1.65564	0.000287947	Mulching/DeepPlowing_G_2A
Thermoplasmata_archaeon_M8B2D	1.65507	0.045356	Mulching/DeepPlowing_G_2A
Candidatus_Rokubacteria_bacterium_13_1_40CM_68_15	-1.65393	0.00469675	Mulching/DeepPlowing_G_2A
Nonomuraea_sp._KC333	1.65387	0.0244344	Mulching/DeepPlowing_N_2A
candidate_division_WWE3_bacterium_RIFCSPLOWO2_01_FULL_41_18	1.65289	0.0257014	Mulching/DeepPlowing_G_2A
Arthrobacter_phage_Shrooms	1.65252	0.0053165	Mulching/DeepPlowing_G_2A
Thaumarchaeota_archaeon_13_1_20CM_2_39_20	-1.652	0.00803887	Mulching/DeepPlowing_G_2A
Streptomyces_sp._alain-838	1.65171	0.0291715	Mulching/DeepPlowing_G_2A
Betaproteobacteria_bacterium_RIFCSPLOWO2_12_FULL_67_28	-1.65162	0.00123406	Mulching/DeepPlowing_G_2A
Pseudoxanthomonas_sp._NML130969	1.65128	0.00777458	Mulching/DeepPlowing_G_2A
Gaeumannomyces_tritici	1.65091	0.0108604	Mulching/DeepPlowing_G_2A
Candidatus_Rokubacteria_bacterium_13_1_40CM_4_69_39	-1.6493	0.00355146	Mulching/DeepPlowing_G_2A
Streptomyces_graminilatus	1.64814	0.0244344	Mulching/DeepPlowing_N_2A
Flavihumibacter_sp._SB-02	1.64717	0.0314685	Mulching/DeepPlowing_G_2A
Acidobacteria_bacterium_RIFCSPLOWO2_12_FULL_66_10	-1.64668	0.00563554	Mulching/DeepPlowing_G_2A
Cohnella_abietis	1.64655	0.0245421	Mulching/DeepPlowing_G_2A
Trichoderma_parareesei	1.64615	0.0456763	Mulching/DeepPlowing_G_2A
Betaproteobacteria_bacterium_RIFCSPLOWO2_02_FULL_68_150	-1.64539	0.000781571	Mulching/DeepPlowing_G_2A
Streptomyces_phage_LibertyBell	1.64411	0.000781571	Mulching/DeepPlowing_N_2A
Candidatus_Rokubacteria_bacterium_RIFCSPHIGHO2_02_FULL_73_26	-1.64387	0.00123406	Mulching/DeepPlowing_G_2A
Streptomyces_sp._RV15	1.64357	0.0242675	Mulching/DeepPlowing_N_2A
Streptomyces_phage_Kardashian	1.64221	0.0026661	Mulching/DeepPlowing_N_2A
Nitrospirae_bacterium_RBG_19FT_COMBO_58_9	-1.64187	0.0244344	Mulching/DeepPlowing_N_2A
Deltaproteobacteria_bacterium_RIFCSPLOWO2_12_FULL_57_22	-1.64176	0.000287947	Mulching/DeepPlowing_G_2A
Leeuwenhoekiella_sp.	1.64087	0.00275607	Mulching/DeepPlowing_G_2A
Deefgea_sp._D17	1.64055	0.0322364	Mulching/DeepPlowing_G_2A
Candidatus_Rokubacteria_bacterium_CSP1-6	-1.63955	0.00123406	Mulching/DeepPlowing_G_2A
Streptomyces_mobaraensis	1.63826	0.00517422	Mulching/DeepPlowing_G_2A
candidate_division_TM6_bacterium_GW2011_GWF2_30_66	1.63748	0.0399835	Mulching/DeepPlowing_G_2A
Micromonospora_tulbaghiae	1.63723	0.0244344	Mulching/DeepPlowing_N_2A
Achromobacter_pulmonis	1.63703	0.00777458	Mulching/DeepPlowing_G_2A
Kribbella_sandramycini	1.6357	0.0314685	Mulching/DeepPlowing_N_2A
Nitrospira_moscoviensis	-1.63431	0.00399013	Mulching/DeepPlowing_N_2A
Tenacibaculum_sp.	1.63411	0.0141917	Mulching/DeepPlowing_N_2A
Micromonospora_maritima	1.63407	0.00185109	Mulching/DeepPlowing_N_2A
Chitinophaga_polysaccharea	1.63291	0.0244344	Mulching/DeepPlowing_G_2A
Bacteroidetes_bacterium_CG_4_10_14_3_um_filter_31_20	1.63055	0.0208858	Mulching/DeepPlowing_G_2A
Candidatus_Woesebacteria_bacterium_GW2011_GWB1_38_5b	1.63023	0.00845504	Mulching/DeepPlowing_G_2A
Porphyrobacter_sp._LM_6	1.62858	0.0244344	Mulching/DeepPlowing_G_2A
Ophiocordyceps_australis	1.62775	0.000313944	Mulching/DeepPlowing_G_2A
Bordetella_parapertussis	1.62639	0.0496449	Mulching/DeepPlowing_G_2A
Streptomyces_sp._C1-2	1.62515	0.00123406	Mulching/DeepPlowing_N_2A
Streptomyces_virus_Scap1	1.62373	0.00517422	Mulching/DeepPlowing_N_2A
Edaphocola_flava	1.62187	0.0171513	Mulching/DeepPlowing_G_2A
Peredibacter_sp.	1.61945	0.0401464	Mulching/DeepPlowing_G_2A
Achromobacter_sp._NFACC18-2	1.61924	0.0187577	Mulching/DeepPlowing_G_2A
Candidatus_Nitrosocaldus_cavascurensis	-1.61885	0.00275607	Mulching/DeepPlowing_G_2A
Microbulbifer_sp._THAF38	1.61834	0.00563554	Mulching/DeepPlowing_G_2A
Streptomyces_phage_HotFries	1.61819	0.0214137	Mulching/DeepPlowing_N_2A
Nocardia_sp._NRRL_S-836	1.61544	0.0418353	Mulching/DeepPlowing_G_2A
Candidatus_Giovannonibacteria_bacterium_RIFCSPHIGHO2_02_FULL_46_20	1.61395	0.0445654	Mulching/DeepPlowing_G_2A
Streptomyces_viridochromogenes	1.61261	0.00777458	Mulching/DeepPlowing_N_2A
Candidatus_Rokubacteria_bacterium_RIFCSPLOWO2_02_FULL_68_19	-1.6115	0.00275607	Mulching/DeepPlowing_G_2A
Ahrensia_marina	1.61096	0.00967768	Mulching/DeepPlowing_G_2A
Rickettsiales_endosymbiont_of_Stachyamoeba_lipophora	1.61078	0.0183534	Mulching/DeepPlowing_G_2A
Silvanigrella_paludirubra	1.6099	0.0216164	Mulching/DeepPlowing_G_2A
Microgenomates_group_bacterium_GW2011_GWC1_41_20	1.60933	0.0349299	Mulching/DeepPlowing_N_2A
Salegentibacter_sp._T436	1.60914	0.0379494	Mulching/DeepPlowing_G_2A
Pseudomonas_oleovorans	1.60906	0.0141917	Mulching/DeepPlowing_G_2A
Gramella_sp._BOM4	1.60885	0.01689	Mulching/DeepPlowing_G_2A
Turicibacter_sanguinis	1.60869	0.0208912	Mulching/DeepPlowing_G_2A
Candidatus_Rokubacteria_bacterium_RIFCSPLOWO2_02_FULL_73_56	-1.60653	0.0026661	Mulching/DeepPlowing_G_2A
Candidatus_Rokubacteria_bacterium_13_1_20CM_2_69_58	-1.60459	0.00399013	Mulching/DeepPlowing_G_2A
Aeromonas_salmonicida	1.60377	0.0133708	Mulching/DeepPlowing_G_2A
Marinobacter_sp._Z-F4-2	1.60259	0.0349299	Mulching/DeepPlowing_G_2A
Candidatus_Roizmanbacteria_bacterium_GW2011_GWA2_34_18	1.60178	0.014177	Mulching/DeepPlowing_N_2A
Roseobacter_phage_CRP-3	1.60139	0.00363499	Mulching/DeepPlowing_G_2A
bacterium_AMD02	1.60086	0.00563554	Mulching/DeepPlowing_N_2A
Candidatus_Roizmanbacteria_bacterium_RIFCSPHIGHO2_01_FULL_38_15	1.60016	0.0117204	Mulching/DeepPlowing_G_2A
Candidatus_Roizmanbacteria_bacterium_RIFCSPLOWO2_01_FULL_40_32	1.59844	0.0183534	Mulching/DeepPlowing_G_2A
Limnobacter_sp._SAORIC-580	1.59777	0.0322364	Mulching/DeepPlowing_N_2A
Pontibacter_sp._2b14	1.59773	0.00563554	Mulching/DeepPlowing_N_2A
Blastocatellia_bacterium	-1.59752	0.00399013	Mulching/DeepPlowing_G_2A
Estrella_lausannensis	1.59721	0.0379494	Mulching/DeepPlowing_G_2A
Sphaerisporangium_siamense	1.59639	0.000781571	Mulching/DeepPlowing_N_2A
Porphyrobacter_sp._AAP82	1.59601	0.0314685	Mulching/DeepPlowing_G_2A
Kineococcus_sp._T13	1.59571	0.0399835	Mulching/DeepPlowing_G_2A
Pseudomonas_sp._21	1.59526	0.00797156	Mulching/DeepPlowing_G_2A
Candidatus_Saccharibacteria_bacterium_CG_4_10_14_0_2_um_filter_52_9	1.59522	0.00275607	Mulching/DeepPlowing_N_2A
Candidatus_Andersenbacteria_bacterium_RIFCSPHIGHO2_01_FULL_46_36	1.59501	0.0227205	Mulching/DeepPlowing_G_2A
Acidobacteria_bacterium_13_1_20CM_3_53_8	-1.59314	0.000287947	Mulching/DeepPlowing_G_2A
Candidatus_Falkowbacteria_bacterium_CG10_big_fil_rev_8_21_14_0_10_43_10	1.59192	0.0053165	Mulching/DeepPlowing_G_2A
Betaproteobacteria_bacterium_RIFCSPLOWO2_02_FULL_67_19	-1.59167	0.00123406	Mulching/DeepPlowing_G_2A
Candidatus_Roizmanbacteria_bacterium_RIFCSPLOWO2_01_FULL_40_42	1.5913	0.0171513	Mulching/DeepPlowing_G_2A
Chloroflexi_bacterium_13_1_40CM_68_15	-1.59099	0.0026255	Mulching/DeepPlowing_G_2A
Crenarchaeota_archaeon_13_1_20CM_2_51_8	-1.59064	0.00198698	Mulching/DeepPlowing_G_2A
Nitrospira_japonica	-1.59049	0.00275607	Mulching/DeepPlowing_G_2A
Chitinophaga_sp._MD30	1.59038	0.0187577	Mulching/DeepPlowing_G_2A
Alteromonas_macleodii	1.59008	0.0314685	Mulching/DeepPlowing_N_2A
Altibacter_sp.	1.58949	0.0269581	Mulching/DeepPlowing_N_2A
Candidatus_Micrarchaeota_archaeon_CG08_land_8_20_14_0_20_59_11	1.58925	0.0184658	Mulching/DeepPlowing_N_2A
Chitinibacter_sp._GC72	1.589	0.0187577	Mulching/DeepPlowing_G_2A
Oerskovia_sp._Root918	1.58833	0.00144524	Mulching/DeepPlowing_N_2A
Trichoderma_guizhouense	1.58632	0.0338606	Mulching/DeepPlowing_N_2A
Nonomuraea_sp._NEAU-YG30	1.58631	0.0399835	Mulching/DeepPlowing_N_2A
Micrococcus_luteus	1.58561	0.00966455	Mulching/DeepPlowing_G_2A
Candidatus_Wildermuthbacteria_bacterium_GWA2_46_15	1.585	0.0208912	Mulching/DeepPlowing_G_2A
Candidatus_Saccharibacteria_bacterium_32-45-3	1.58466	0.0265857	Mulching/DeepPlowing_N_2A
Fusarium_graminearum	1.58352	0.014042	Mulching/DeepPlowing_G_2A
Thermocatellispora_tengchongensis	1.58342	0.0244344	Mulching/DeepPlowing_N_2A
Paraburkholderia_aromaticivorans	1.58217	0.0141917	Mulching/DeepPlowing_G_2A
Actinobacteria_bacterium_13_1_20CM_2_65_11	-1.58217	0.00563554	Mulching/DeepPlowing_G_2A
Microbacterium_sp._RURRCA19A	1.58201	0.045356	Mulching/DeepPlowing_G_2A
Streptomyces_microflavus	1.5819	0.0141917	Mulching/DeepPlowing_N_2A
Betaproteobacteria_bacterium_RIFCSPLOWO2_12_FULL_63_13	-1.58137	0.00123406	Mulching/DeepPlowing_G_2A
Streptomyces_davaonensis	1.58108	0.0412001	Mulching/DeepPlowing_N_2A
Massilia_sp._RP-1-19	1.58085	0.0106129	Mulching/DeepPlowing_G_2A
Bacteroides_uniformis	1.58074	0.0187577	Mulching/DeepPlowing_N_2A
Candidatus_Wildermuthbacteria_bacterium_RIFCSPHIGHO2_02_FULL_45_25	1.58019	0.00185132	Mulching/DeepPlowing_G_2A
Deefgea_rivuli	1.57914	0.0120418	Mulching/DeepPlowing_G_2A
Filimonas_endophytica	1.57782	0.0244344	Mulching/DeepPlowing_G_2A
Rhodococcus_virus_Pepy6	1.57593	0.0183534	Mulching/DeepPlowing_G_2A
Faustovirus	1.57557	0.0139501	Mulching/DeepPlowing_G_2A
Erythrobacter_sp._CCH5-A1	1.57364	0.00608743	Mulching/DeepPlowing_G_2A
Salinicola_peritrichatus	1.57286	0.0229511	Mulching/DeepPlowing_G_2A
Thermus_brockianus	1.57215	0.0345474	Mulching/DeepPlowing_N_2A
Armatimonadetes_bacterium_CG_4_9_14_3_um_filter_58_7	1.57132	0.0314685	Mulching/DeepPlowing_G_2A
Caulobacter_phage_Cr30	1.57109	0.0046091	Mulching/DeepPlowing_G_2A
Cordyceps_fumosorosea	1.56988	0.014177	Mulching/DeepPlowing_N_2A
Streptomyces_luteus	1.56723	0.0114161	Mulching/DeepPlowing_N_2A
halophilic_archaeon	-1.56711	0.000558691	Mulching/DeepPlowing_G_2A
Streptomonospora_salina	1.56669	0.00339918	Mulching/DeepPlowing_N_2A
Caulobacter_phage_RW	1.56594	0.0180195	Mulching/DeepPlowing_G_2A
Streptomyces_virus_Hiyaa	1.56548	0.00909928	Mulching/DeepPlowing_N_2A
Campylobacter_lari	1.56514	0.0053165	Mulching/DeepPlowing_G_2A
Deltaproteobacteria_bacterium_RIFCSPLOWO2_02_FULL_57_26	-1.56487	0.00275607	Mulching/DeepPlowing_G_2A
Candidatus_Saccharibacteria_bacterium_oral_taxon_955	1.56443	0.00275607	Mulching/DeepPlowing_N_2A
Achromobacter_insolitus	1.56353	0.0187577	Mulching/DeepPlowing_G_2A
Armatimonadetes_bacterium_RBG_19FT_COMBO_69_19	-1.5635	0.00123406	Mulching/DeepPlowing_G_2A
Nitrososphaera_phage_Pro-Nvie1	-1.5632	0.0026661	Mulching/DeepPlowing_G_2A
Microgenomates_group_bacterium_GW2011_GWC1_46_16	1.56291	0.0108604	Mulching/DeepPlowing_G_2A
Terracoccus_luteus	1.56276	0.00593046	Mulching/DeepPlowing_N_2A
Spartobacteria_bacterium	1.56228	0.0244344	Mulching/DeepPlowing_G_2A
Neisseria_shayeganii	1.56101	0.00833652	Mulching/DeepPlowing_G_2A
Geobacillus_thermodenitrificans	1.56097	0.0120418	Mulching/DeepPlowing_G_2A
Saccharopolyspora_shandongensis	1.56078	0.0468311	Mulching/DeepPlowing_G_2A
Nocardioides_baekrokdamisoli	1.55959	0.000781571	Mulching/DeepPlowing_N_2A
Novosphingobium_sediminis	1.55891	0.0399835	Mulching/DeepPlowing_G_2A
Undibacterium_sp._CY21W	1.55839	0.0314685	Mulching/DeepPlowing_G_2A
Prauserella_coralliicola	1.55734	0.00275607	Mulching/DeepPlowing_N_2A
Syntrophorhabdus_sp._PtaU1.Bin050	1.55637	0.0421538	Mulching/DeepPlowing_G_2A
Janthinobacterium_sp._LM6	1.55599	0.0314685	Mulching/DeepPlowing_G_2A
Betaproteobacteria_bacterium_RIFCSPLOWO2_02_FULL_62_79	-1.5526	0.000781571	Mulching/DeepPlowing_G_2A
Trichoderma_atroviride	1.55097	0.0018486	Mulching/DeepPlowing_G_2A
Mycobacteroides_chelonae	1.55073	0.00275607	Mulching/DeepPlowing_N_2A
Actinomadura_parvosata	1.55058	0.00275607	Mulching/DeepPlowing_N_2A
Lomentospora_prolificans	1.55016	0.0269581	Mulching/DeepPlowing_G_2A
Acidobacteria_bacterium_RIFCSPLOWO2_02_FULL_65_29	-1.55005	0.00563554	Mulching/DeepPlowing_G_2A
Bacillus_camelliae	1.54975	0.0338606	Mulching/DeepPlowing_G_2A
Brevibacterium_casei	1.54919	0.00355146	Mulching/DeepPlowing_N_2A
Sphingorhabdus_sp._GY_G	1.54848	0.0141917	Mulching/DeepPlowing_G_2A
Caulobacter_virus_CcrPW	1.5471	0.0108628	Mulching/DeepPlowing_G_2A
Betaproteobacteria_bacterium_RIFCSPLOWO2_02_FULL_66_14	-1.54688	0.00123406	Mulching/DeepPlowing_G_2A
Candidatus_Rokubacteria_bacterium_RIFCSPLOWO2_12_FULL_73_47	-1.54588	0.00355146	Mulching/DeepPlowing_G_2A
Deltaproteobacteria_bacterium_RBG_16_55_12	-1.54566	0.000164541	Mulching/DeepPlowing_G_2A
Candidatus_Saccharibacteria_bacterium_32-49-12	1.5452	0.00185109	Mulching/DeepPlowing_N_2A
Nocardia_cerradoensis	1.54428	0.0180195	Mulching/DeepPlowing_G_2A
Eudoraea_sp.	1.54414	0.0244344	Mulching/DeepPlowing_G_2A
Limnobacter_thiooxidans	1.54408	0.018664	Mulching/DeepPlowing_G_2A
Monosporascus_sp._MG133	1.54334	0.0229511	Mulching/DeepPlowing_G_2A
Armatimonadetes_bacterium_RBG_19FT_COMBO_69_19	-1.54295	0.00399013	Mulching/DeepPlowing_N_2A
Candidatus_Melainabacteria_bacterium_HGW-Melainabacteria-1	1.5403	0.0399835	Mulching/DeepPlowing_G_2A
Candidatus_Pacebacteria_bacterium_CG10_big_fil_rev_8_21_14_0_10_45_6	1.53952	0.0229511	Mulching/DeepPlowing_G_2A
Klebsiella_oxytoca	1.5394	0.0110555	Mulching/DeepPlowing_G_2A
Taibaiella_sp._F-4	1.53907	0.0401464	Mulching/DeepPlowing_G_2A
Williamsia_sterculiae	1.53888	0.00145282	Mulching/DeepPlowing_N_2A
Myxococcus_sp._CA039A	1.53882	0.0399835	Mulching/DeepPlowing_G_2A
Micromonospora_sp._NBS_11-29	-1.53855	0.000787319	Mulching/DeepPlowing_G_2A
Salinicola_peritrichatus	1.53852	0.0271959	Mulching/DeepPlowing_N_2A
Spirosoma_terrae	1.53849	0.00563554	Mulching/DeepPlowing_N_2A
Candidatus_Rokubacteria_bacterium_13_1_20CM_4_70_13	-1.5373	0.0141917	Mulching/DeepPlowing_N_2A
Pseudomonas_sp._OV529	-1.53703	0.00616675	Mulching/DeepPlowing_G_2A
Candidatus_Odyssella_thessalonicensis	1.53648	0.00133923	Mulching/DeepPlowing_G_2A
Microgenomates_group_bacterium_GW2011_GWB1_44_8	1.53522	0.0210105	Mulching/DeepPlowing_G_2A
Bacteroidetes_bacterium_CG_4_8_14_3_um_filter_31_14	1.53517	0.0162905	Mulching/DeepPlowing_G_2A
Uliginosibacterium_gangwonense	1.5349	0.0399835	Mulching/DeepPlowing_G_2A
Candidatus_Pacebacteria_bacterium_CG_4_9_14_0_2_um_filter_34_50	1.53412	0.0401464	Mulching/DeepPlowing_G_2A
Nocardiopsis_gilva	1.53411	0.0187577	Mulching/DeepPlowing_G_2A
Mucilaginibacter_sp.	1.5334	0.0296561	Mulching/DeepPlowing_G_2A
Aminomonas_paucivorans	1.53189	0.0067849	Mulching/DeepPlowing_G_2A
Pseudomonas_sp._PGPPP2	1.53155	0.0053165	Mulching/DeepPlowing_G_2A
Halomonas_sp.	1.53141	0.0106129	Mulching/DeepPlowing_G_2A
Isoptericola_sp._TLY-12	1.53106	0.00777458	Mulching/DeepPlowing_G_2A
Cryomorphaceae_bacterium	1.53029	0.0399835	Mulching/DeepPlowing_G_2A
Maribacter_luteus	1.5297	0.0496449	Mulching/DeepPlowing_G_2A
Moritella_viscosa	1.52967	0.0379494	Mulching/DeepPlowing_G_2A
Planctomycetes_bacterium_SM23_25	1.5296	0.0399835	Mulching/DeepPlowing_G_2A
Streptomyces_turgidiscabies	1.52924	0.0187577	Mulching/DeepPlowing_G_2A
Polynucleobacter_paneuropaeus	1.52887	0.00622372	Mulching/DeepPlowing_G_2A
Actinobacteria_bacterium_13_1_40CM_4_65_12	-1.52882	0.000493624	Mulching/DeepPlowing_G_2A
Betaproteobacteria_bacterium_RIFCSPLOWO2_02_FULL_65_24	-1.52852	0.000781571	Mulching/DeepPlowing_G_2A
Janthinobacterium_sp._FT58W	1.52798	0.0187577	Mulching/DeepPlowing_G_2A
Candidatus_Woesebacteria_bacterium_RIFCSPHIGHO2_12_FULL_46_16	1.52756	0.047584	Mulching/DeepPlowing_G_2A
Streptomyces_violaceorubidus	1.52625	0.0322364	Mulching/DeepPlowing_N_2A
Caulobacter_sp._CCH4-E1	1.52607	0.00399013	Mulching/DeepPlowing_G_2A
Chitinophaga_dinghuensis	1.52534	0.00794144	Mulching/DeepPlowing_G_2A
Deinococcus_sp._KR-1	1.52479	0.0053165	Mulching/DeepPlowing_G_2A
Streptomyces_sp._NRRL_F-5135	1.52369	0.00463274	Mulching/DeepPlowing_N_2A
Gammaproteobacteria_bacterium_45_16_T64	1.52298	0.0314685	Mulching/DeepPlowing_G_2A
Sphingomonadales_bacterium_GWF1_63_6	1.52083	0.0203451	Mulching/DeepPlowing_G_2A
Candidatus_Nomurabacteria_bacterium_GW2011_GWA1_36_15	1.52078	0.014177	Mulching/DeepPlowing_G_2A
Arthrobacter_phage_Mimi	1.52073	0.0244344	Mulching/DeepPlowing_G_2A
Monosporascus_sp._CRB-8-3	1.52048	0.0208858	Mulching/DeepPlowing_G_2A
Chitinophaga_arvensicola	1.52041	0.00185109	Mulching/DeepPlowing_N_2A
Erwinia_phage_vB_EamP-S6	1.52038	0.0456763	Mulching/DeepPlowing_G_2A
Lampropedia_hyalina	1.51982	0.00777458	Mulching/DeepPlowing_G_2A
Colletotrichum_tanaceti	1.51922	0.00493457	Mulching/DeepPlowing_G_2A
Methylobacterium_sp._285MFTsu5.1	1.5189	0.00845504	Mulching/DeepPlowing_G_2A
Streptomyces_sp._MH60	1.51818	0.00399013	Mulching/DeepPlowing_N_2A
Bradyrhizobium_sp._MOS002	1.51576	0.0314685	Mulching/DeepPlowing_G_2A
Bacteroidetes_bacterium_37-13	1.51505	0.0141917	Mulching/DeepPlowing_G_2A
Parcubacteria_group_bacterium_GW2011_GWA2_36_24	1.51469	0.0139501	Mulching/DeepPlowing_G_2A
Duganella_sp._Root336D2	1.51394	0.0229511	Mulching/DeepPlowing_G_2A
Marivita_sp._LZ-15-2	1.51355	0.0208858	Mulching/DeepPlowing_G_2A
Herbidospora_sakaeratensis	1.51339	0.00123406	Mulching/DeepPlowing_N_2A
Candidatus_Rokubacteria_bacterium_13_2_20CM_2_70_11	-1.51218	0.0133708	Mulching/DeepPlowing_G_2A
Clavibacter_virus_CN1A	1.51215	0.00608743	Mulching/DeepPlowing_N_2A
Lewinella_agarilytica	1.51162	0.00480135	Mulching/DeepPlowing_G_2A
Bacteroidetes_bacterium_SW_10_40_5	1.51116	0.0371401	Mulching/DeepPlowing_G_2A
Candidatus_Roizmanbacteria_bacterium_RIFOXYD1_FULL_41_24	1.50953	0.00833652	Mulching/DeepPlowing_G_2A
Cytospora_leucostoma	1.50927	0.0120418	Mulching/DeepPlowing_G_2A
Chitinophaga_arvensicola	1.50924	0.00399013	Mulching/DeepPlowing_G_2A
Sphingomonadales_bacterium_RIFCSPLOWO2_12_FULL_63_15	1.5089	0.00399013	Mulching/DeepPlowing_G_2A
Saccharothrix_violaceirubra	1.50752	0.0106129	Mulching/DeepPlowing_G_2A
Salana_multivorans	1.50746	0.0244344	Mulching/DeepPlowing_G_2A
Chitinophagales_bacterium	1.50731	0.0244344	Mulching/DeepPlowing_G_2A
Maribellus_sp._GM1-28	1.50658	0.0290153	Mulching/DeepPlowing_G_2A
Hypoxylon_sp._EC38	1.50344	0.0053165	Mulching/DeepPlowing_G_2A
Cellulomonas_gilvus	1.50338	0.00469675	Mulching/DeepPlowing_N_2A
Candidatus_Magasanikbacteria_bacterium_RIFOXYD12_FULL_33_17	1.50319	0.0053165	Mulching/DeepPlowing_G_2A
Nitrospira_sp._SCGC_AG-212-E16	-1.50087	0.00399013	Mulching/DeepPlowing_G_2A
TM7_phylum_sp._oral_taxon_352	1.50059	0.0146492	Mulching/DeepPlowing_N_2A
uncultured_bacterium_888	-1.50021	0.0106129	Mulching/DeepPlowing_G_2A
Chromatocurvus_halotolerans	1.50003	0.0314685	Mulching/DeepPlowing_G_2A
Candidatus_Rokubacteria_bacterium_GWC2_70_16	-1.4999	0.0314685	Mulching/DeepPlowing_N_2A
Sphingobium_cupriresistens	1.49929	0.00350027	Mulching/DeepPlowing_G_2A
Sphingobacterium_composti_Yoo_et_al._2007_non_Ten_et_al._2007	1.49921	0.01689	Mulching/DeepPlowing_N_2A
Xylaria_flabelliformis	1.49918	0.00360231	Mulching/DeepPlowing_G_2A
Novosphingobium_lindaniclasticum	1.49908	0.0244344	Mulching/DeepPlowing_G_2A
Erythrobacter_sp._HL-111	1.49859	0.0399835	Mulching/DeepPlowing_G_2A
Candidatus_Nitrosocaldus_islandicus	-1.49831	0.0026661	Mulching/DeepPlowing_G_2A
Actinobacteria_bacterium_13_2_20CM_2_66_6	-1.49785	0.00275607	Mulching/DeepPlowing_G_2A
Colletotrichum_graminicola	1.49768	0.0401464	Mulching/DeepPlowing_N_2A
Actinopolyspora_sp._DSM_45965	1.49568	0.00915373	Mulching/DeepPlowing_G_2A
Sphaerobolus_stellatus	1.49511	0.0338606	Mulching/DeepPlowing_G_2A
Moumouvirus	1.49485	0.01689	Mulching/DeepPlowing_N_2A
Helicobacteraceae_bacterium	1.49458	0.0117903	Mulching/DeepPlowing_N_2A
Haemophilus_influenzae	1.4936	0.0165499	Mulching/DeepPlowing_G_2A
Leucobacter_chironomi	1.49213	0.00622372	Mulching/DeepPlowing_G_2A
Sphingobium_sp._Leaf26	1.49158	0.0399835	Mulching/DeepPlowing_G_2A
Candidatus_Saccharibacteria_bacterium_RIFCSPHIGHO2_12_FULL_42_8	1.4914	0.0106129	Mulching/DeepPlowing_N_2A
Candidatus_Taylorbacteria_bacterium_RIFCSPLOWO2_01_FULL_45_59	1.49087	0.0018486	Mulching/DeepPlowing_G_2A
Kitasatospora_viridis	1.48865	0.00777458	Mulching/DeepPlowing_N_2A
Candidatus_Rokubacteria_bacterium_GWA2_70_23	-1.48835	0.0244344	Mulching/DeepPlowing_N_2A
Betaproteobacteria_bacterium_RIFCSPLOWO2_12_FULL_68_19	-1.48576	0.000781571	Mulching/DeepPlowing_G_2A
Isoptericola_variabilis	1.48368	0.00777458	Mulching/DeepPlowing_N_2A
Streptomyces_sp._WAC00263	-1.4836	0.00777458	Mulching/DeepPlowing_G_2A
uncultured_bacterium_F39-01	-1.48117	0.0133708	Mulching/DeepPlowing_G_2A
Actinobacteria_bacterium_RBG_16_68_12	-1.48035	0.00275607	Mulching/DeepPlowing_G_2A
Sphingobacterium_sp._PM2-P1-29	1.47912	0.0053165	Mulching/DeepPlowing_G_2A
Fusarium_floridanum	1.47911	0.00593046	Mulching/DeepPlowing_G_2A
Fusarium_acutatum	1.47802	0.00641585	Mulching/DeepPlowing_G_2A
Lautropia_sp._SCN_70-15	-1.47776	0.000493624	Mulching/DeepPlowing_G_2A
Symploca_sp._SIO2C1	1.47734	0.00275607	Mulching/DeepPlowing_G_2A
Leptolyngbya_boryana	1.47717	0.0187577	Mulching/DeepPlowing_G_2A
Thioalkalivibrio_sp._K90mix	1.47638	0.0401464	Mulching/DeepPlowing_G_2A
Rhodococcus_sp._05-2254-2	1.47415	0.0016442	Mulching/DeepPlowing_N_2A
Ideonella_dechloratans	1.47409	0.00563554	Mulching/DeepPlowing_N_2A
Arcicella_aurantiaca	1.47357	0.0187577	Mulching/DeepPlowing_G_2A
Betaproteobacteria_bacterium_RIFCSPLOWO2_12_FULL_68_20	-1.47314	0.00123406	Mulching/DeepPlowing_G_2A
Pseudomonas_moorei	1.47235	0.0203451	Mulching/DeepPlowing_G_2A
Roseomonas_alkaliterrae	1.47143	0.0399835	Mulching/DeepPlowing_G_2A
Candidatus_Rokubacteria_bacterium_RIFCSPHIGHO2_12_FULL_73_22	-1.46996	0.0187577	Mulching/DeepPlowing_N_2A
Thalassospira_lohafexi	1.4693	0.0133838	Mulching/DeepPlowing_G_2A
uncultured_bacterium_CSL132	-1.46838	0.000569872	Mulching/DeepPlowing_G_2A
Amycolatopsis_panacis	-1.46758	0.0026661	Mulching/DeepPlowing_G_2A
Betaproteobacteria_bacterium_13_1_20CM_3_63_8	-1.4672	0.00123406	Mulching/DeepPlowing_G_2A
Xanthomonas_phage_Xoo-sp13	1.46673	0.0421538	Mulching/DeepPlowing_N_2A
Sphingobium_czechense	1.46587	0.0244344	Mulching/DeepPlowing_G_2A
Micromonospora_tulbaghiae	1.46559	0.0314685	Mulching/DeepPlowing_G_2A
Colletotrichum_higginsianum	1.46388	0.0108604	Mulching/DeepPlowing_G_2A
Betaproteobacteria_bacterium_SG8_39	-1.4635	0.00185109	Mulching/DeepPlowing_G_2A
Erythrobacter_sp._HI0019	1.46342	0.0399835	Mulching/DeepPlowing_G_2A
Kordiimonadales_bacterium	1.46333	0.0296561	Mulching/DeepPlowing_G_2A
Massilia_violaceinigra	1.46319	0.0399835	Mulching/DeepPlowing_G_2A
Streptomyces_sp._3214.6	1.46314	0.0399835	Mulching/DeepPlowing_N_2A
Burkholderia_virus_Bcepil02	1.46298	0.015117	Mulching/DeepPlowing_G_2A
Thiofilum_flexile	1.46274	0.0257014	Mulching/DeepPlowing_G_2A
Franconibacter_helveticus	1.46107	0.00608411	Mulching/DeepPlowing_G_2A
Candidatus_Saccharibacteria_bacterium_32-49-10	1.46045	0.045811	Mulching/DeepPlowing_G_2A
Agrobacterium_fabrum	1.46019	0.0399835	Mulching/DeepPlowing_N_2A
Vampirovibrio_chlorellavorus	1.46018	0.0187577	Mulching/DeepPlowing_G_2A
Candidatus_Uhrbacteria_bacterium_RIFCSPLOWO2_12_FULL_47_10	1.46004	0.027555	Mulching/DeepPlowing_G_2A
Vibrio_alginolyticus	1.45902	0.00777458	Mulching/DeepPlowing_N_2A
Vogesella_mureinivorans	1.45896	0.0183534	Mulching/DeepPlowing_G_2A
Armatimonadetes_bacterium_13_1_40CM_3_65_7	-1.4589	0.00275607	Mulching/DeepPlowing_G_2A
Erythrobacter_sp._YT30	1.45814	0.0106129	Mulching/DeepPlowing_G_2A
Ardenticatena_maritima	-1.45801	0.0106129	Mulching/DeepPlowing_N_2A
Candidatus_Rokubacteria_bacterium_13_1_40CM_2_68_8	-1.45792	0.00275607	Mulching/DeepPlowing_G_2A
Tetraselmis_viridis_virus_SI1	1.45731	0.0162905	Mulching/DeepPlowing_G_2A
Streptomyces_sp._HG99	1.45719	0.0314685	Mulching/DeepPlowing_N_2A
Nitrospira_lenta	-1.45718	0.00399013	Mulching/DeepPlowing_N_2A
Ralstonia_sp._3N	1.45594	0.00567379	Mulching/DeepPlowing_N_2A
Xanthomonas_phage_Xoo-sp2	1.45542	0.0018486	Mulching/DeepPlowing_G_2A
Lewinella_antarctica	1.45433	0.0335742	Mulching/DeepPlowing_G_2A
Novosphingobium_sp._17-62-9	1.45396	0.0106129	Mulching/DeepPlowing_G_2A
Parcubacteria_group_bacterium_GW2011_GWA1_33_6	1.45368	0.00493457	Mulching/DeepPlowing_G_2A
Fusarium_pseudograminearum	1.45368	0.00777458	Mulching/DeepPlowing_G_2A
Streptomyces_phage_Moab	1.45303	0.00185109	Mulching/DeepPlowing_N_2A
Actinobacteria_bacterium_OV450	1.45303	0.01689	Mulching/DeepPlowing_N_2A
Betaproteobacteria_bacterium_RIFCSPLOWO2_12_FULL_65_14	-1.4519	0.00123406	Mulching/DeepPlowing_G_2A
Ochrobactrum_sp._CM-21-5	1.4512	0.0218189	Mulching/DeepPlowing_G_2A
Hahella_sp._CCB-MM4	1.45073	0.0244344	Mulching/DeepPlowing_N_2A
Sphingobacteriales_bacterium	1.44972	0.0314685	Mulching/DeepPlowing_G_2A
Streptomyces_griseoaurantiacus	1.44929	0.00777458	Mulching/DeepPlowing_N_2A
Trichoderma_lentiforme	1.44803	0.0354177	Mulching/DeepPlowing_G_2A
Candidatus_Rokubacteria_bacterium_13_1_20CM_2_68_19	-1.44742	0.00803887	Mulching/DeepPlowing_G_2A
Paraburkholderia_sp._7Q-K02	1.44628	0.0399835	Mulching/DeepPlowing_G_2A
Opitutaceae_bacterium_BACL24_MAG-120322-bin51	1.44541	0.045811	Mulching/DeepPlowing_G_2A
Streptomyces_sp._BK335	1.44486	0.00275607	Mulching/DeepPlowing_N_2A
Actinopolyspora_xinjiangensis	1.44422	0.0133838	Mulching/DeepPlowing_G_2A
Mycobacteroides_abscessus	1.4437	0.0106129	Mulching/DeepPlowing_N_2A
Zetaproteobacteria_bacterium_CG23_combo_of_CG06-09_8_20_14_all_54_7	1.44326	0.0354177	Mulching/DeepPlowing_N_2A
Betaproteobacteria_bacterium_RIFCSPHIGHO2_12_FULL_69_13	-1.44294	0.00123406	Mulching/DeepPlowing_G_2A
Yasminevirus_sp._GU-2018	1.44284	0.047584	Mulching/DeepPlowing_G_2A
Parcubacteria_group_bacterium_LiPW_39	1.44171	0.0139501	Mulching/DeepPlowing_G_2A
Achromobacter_aloeverae	1.44155	0.00563554	Mulching/DeepPlowing_G_2A
Mesorhizobium_sp._M7D.F.Ca.US.005.01.1.1	1.4413	0.0399835	Mulching/DeepPlowing_N_2A
Acidobacteria_bacterium_13_1_40CM_3_65_5	-1.44058	0.00399013	Mulching/DeepPlowing_G_2A
Gordonia_phage_Crocheter	1.43997	0.00608411	Mulching/DeepPlowing_N_2A
bacterium_ADurb.BinA028	1.43979	0.00463274	Mulching/DeepPlowing_N_2A
Bacillus_thermozeamaize	-1.43931	0.000781571	Mulching/DeepPlowing_G_2A
Flavobacterium_croceum	1.43922	0.0338606	Mulching/DeepPlowing_G_2A
Shewanella_sp._CG_4_10_14_0_8_um_filter_42_13	1.43914	0.0227205	Mulching/DeepPlowing_G_2A
Microbispora_sp._KK1-11	1.43887	0.000493624	Mulching/DeepPlowing_N_2A
Streptomyces_sp._Root1310	1.43835	0.0229511	Mulching/DeepPlowing_N_2A
Yarrowia_lipolytica	1.43783	0.0229511	Mulching/DeepPlowing_G_2A
Chitinibacter_sp._ZOR0017	1.43725	0.00275607	Mulching/DeepPlowing_G_2A
Bacillus_sp._REN51N	1.43686	0.00664093	Mulching/DeepPlowing_G_2A
Saccharothrix_sp.	1.43567	0.0399835	Mulching/DeepPlowing_N_2A
Streptomyces_phage_Madamato	1.43527	0.0271959	Mulching/DeepPlowing_N_2A
Kineococcus_rhizosphaerae	1.43467	0.0236102	Mulching/DeepPlowing_G_2A
Humibacillus_xanthopallidus	-1.43355	8.22707e-05	Mulching/DeepPlowing_G_2A
Candidatus_Moranbacteria_bacterium_RBG_19FT_COMBO_42_6	1.43206	0.0208912	Mulching/DeepPlowing_G_2A
Nonomuraea_sp._NEAU-YG30	1.43147	0.0187577	Mulching/DeepPlowing_G_2A
bacterium_AMD01	1.4313	0.000781571	Mulching/DeepPlowing_N_2A
Pontibacter_sp._HB172049	1.43114	0.0106129	Mulching/DeepPlowing_G_2A
Candidatus_Nomurabacteria_bacterium_GW2011_GWA1_35_8	1.43099	0.0053165	Mulching/DeepPlowing_G_2A
Pseudomonadales_bacterium_RIFCSPLOWO2_02_FULL_63_210	-1.43003	0.00123406	Mulching/DeepPlowing_G_2A
Kutzneria_albida	1.43	0.0187577	Mulching/DeepPlowing_N_2A
Mycobacterium_phage_Piper2020	1.42961	0.0290153	Mulching/DeepPlowing_N_2A
Acidobacteria_bacterium_13_1_40CM_65_14	-1.42757	0.00563554	Mulching/DeepPlowing_G_2A
Salinicola_salarius	1.42746	0.0420777	Mulching/DeepPlowing_G_2A
Acidovorax_sp._ST3	1.42688	0.0314685	Mulching/DeepPlowing_G_2A
Chlamydiae_bacterium_RIFCSPLOWO2_02_FULL_45_22	1.42686	0.0227205	Mulching/DeepPlowing_G_2A
Streptomyces_sp._H-KF8	1.42603	0.0257014	Mulching/DeepPlowing_N_2A
Methylomonas_sp._GJ1	1.42563	0.0399835	Mulching/DeepPlowing_G_2A
Dysgonamonadaceae_bacterium	1.42554	0.00967768	Mulching/DeepPlowing_G_2A
Schleiferia_thermophila	1.42526	0.014177	Mulching/DeepPlowing_G_2A
Methanocaldococcus_bathoardescens	-1.42423	0.00145282	Mulching/DeepPlowing_G_2A
Microbacterium_phage_Araxxi	1.42404	0.0399835	Mulching/DeepPlowing_N_2A
Desertiactinospora_gelatinilytica	1.4236	0.00563554	Mulching/DeepPlowing_N_2A
Chloroflexi_bacterium_54-19	-1.4235	8.22707e-05	Mulching/DeepPlowing_G_2A
Novibacillus_thermophilus	1.42308	0.0322364	Mulching/DeepPlowing_G_2A
Chitinophaga_parva	1.42205	0.0314685	Mulching/DeepPlowing_G_2A
Prolixibacter_sp._NT017	1.42203	0.01689	Mulching/DeepPlowing_G_2A
Capnocytophaga_sp._oral_taxon_332	1.42176	0.0338606	Mulching/DeepPlowing_G_2A
Ignavibacteria_bacterium_GWA2_55_11	-1.4212	0.0026661	Mulching/DeepPlowing_G_2A
Streptomyces_sp._MJM1172	1.42104	0.0337003	Mulching/DeepPlowing_N_2A
Amycolatopsis_orientalis	1.42103	0.0314685	Mulching/DeepPlowing_G_2A
Nitrospira_sp._CG24E	-1.42055	0.00777458	Mulching/DeepPlowing_N_2A
Betaproteobacteria_bacterium_SCGC_AG-212-J23	-1.42033	0.00275607	Mulching/DeepPlowing_G_2A
Streptomyces_gilvosporeus	-1.42006	0.00198698	Mulching/DeepPlowing_G_2A
Synechococcaceae_cyanobacterium_SM2_3_1	1.41936	0.0187577	Mulching/DeepPlowing_G_2A
Eubacterium_sp.	1.4188	0.0180195	Mulching/DeepPlowing_N_2A
Delftia_sp._Cs1-4	1.41738	0.00057874	Mulching/DeepPlowing_G_2A
Candidatus_Rokubacteria_bacterium_13_1_40CM_69_27	-1.41735	0.0106129	Mulching/DeepPlowing_G_2A
Streptomyces_sp._61	1.41687	0.00120417	Mulching/DeepPlowing_N_2A
Pseudomonas_phage_vB_PaeS_SCUT-S3	1.41659	0.0468914	Mulching/DeepPlowing_G_2A
Brevibacterium_virus_LuckyBarnes	1.4163	0.0304245	Mulching/DeepPlowing_G_2A
Polynucleobacter_sp._39-45-136	1.41591	0.00268206	Mulching/DeepPlowing_G_2A
Betaproteobacteria_bacterium_13_1_20CM_67_22	-1.41397	0.00275607	Mulching/DeepPlowing_G_2A
Streptomyces_sp._SID2119	1.41284	0.0401464	Mulching/DeepPlowing_N_2A
Bacteroidetes_bacterium_CG23_combo_of_CG06-09_8_20_14_all_32_9	1.41273	0.0139501	Mulching/DeepPlowing_N_2A
Legionella_lansingensis	-1.41273	0.0244344	Mulching/DeepPlowing_N_2A
Sphaerisporangium_sp._LHW63015	1.41209	0.00185109	Mulching/DeepPlowing_N_2A
Nitrospira_moscoviensis	-1.41155	0.00777458	Mulching/DeepPlowing_G_2A
Chloroflexi_bacterium	-1.41119	0.000164541	Mulching/DeepPlowing_G_2A
Spirochaetae_bacterium_HGW-Spirochaetae-1	1.4108	0.0314685	Mulching/DeepPlowing_G_2A
Pseudomonas_sp._ATCC_13867	1.41012	0.0314685	Mulching/DeepPlowing_N_2A
Kiritimatiellales_bacterium	1.40992	0.037878	Mulching/DeepPlowing_G_2A
Variovorax_sp._SG533	1.40946	0.0244344	Mulching/DeepPlowing_G_2A
Thaumarchaeota_archaeon_13_1_40CM_3_38_6	-1.40927	0.00803887	Mulching/DeepPlowing_G_2A
Methylobacterium_sp._yr668	1.40887	0.00567379	Mulching/DeepPlowing_N_2A
Mesorhizobium_sp._M2C.T.Ca.TU.002.02.1.1	-1.40829	0.000287947	Mulching/DeepPlowing_G_2A
Burkholderia_sp._S171	1.40805	0.0314685	Mulching/DeepPlowing_G_2A
Propionivibrio_dicarboxylicus	1.40795	0.0187577	Mulching/DeepPlowing_G_2A
Betaproteobacteria_bacterium_RIFCSPLOWO2_12_FULL_66_14	-1.40735	0.00123406	Mulching/DeepPlowing_G_2A
Chlamydiae_bacterium_RIFCSPHIGHO2_12_FULL_49_32	1.40706	0.0227205	Mulching/DeepPlowing_G_2A
Nocardia_cyriacigeorgica	1.40665	0.000781571	Mulching/DeepPlowing_N_2A
Pedobacter_cryoconitis	1.40661	0.0106129	Mulching/DeepPlowing_N_2A
Alteromonas_macleodii	1.40631	0.0187577	Mulching/DeepPlowing_G_2A
Candidatus_Saccharibacteria_bacterium_RIFCSPHIGHO2_12_FULL_41_12	1.40617	0.0141917	Mulching/DeepPlowing_N_2A
Nocardiopsis_salina	1.40526	0.014177	Mulching/DeepPlowing_N_2A
Pantoea_cypripedii	1.40521	0.0445654	Mulching/DeepPlowing_G_2A
Mycobacterium_sp._E2733	1.40509	0.0371401	Mulching/DeepPlowing_G_2A
Nocardioides_sp._Root682	1.40508	0.0244344	Mulching/DeepPlowing_N_2A
Streptomyces_phage_Comrade	1.40469	0.00794144	Mulching/DeepPlowing_N_2A
Caudovirales_sp._ctOwN3	1.40446	0.045356	Mulching/DeepPlowing_G_2A
Streptomyces_mobaraensis	1.4039	0.0132277	Mulching/DeepPlowing_N_2A
Candidatus_Daviesbacteria_bacterium_RIFCSPLOWO2_02_FULL_36_7	1.40385	0.0354177	Mulching/DeepPlowing_N_2A
Streptomyces_sp._OK228	-1.40317	0.00777458	Mulching/DeepPlowing_G_2A
Rickettsiales_bacterium	1.40242	0.0106129	Mulching/DeepPlowing_G_2A
Streptomyces_gardneri	1.40124	0.00339918	Mulching/DeepPlowing_N_2A
Fusarium_flagelliforme	1.40095	0.014177	Mulching/DeepPlowing_G_2A
Desulfobacteraceae_bacterium_4572_123	1.40089	0.0170611	Mulching/DeepPlowing_G_2A
Neopestalotiopsis_sp._37M	1.40066	0.00131723	Mulching/DeepPlowing_G_2A
Pimelobacter_simplex	1.40051	0.000493624	Mulching/DeepPlowing_N_2A
Marinobacter_salarius	1.40037	0.0141917	Mulching/DeepPlowing_G_2A
Brevibacillus_sp._SKDU10	1.40009	0.00493457	Mulching/DeepPlowing_G_2A
Chitinophaga_sp._1303	1.39907	0.00275607	Mulching/DeepPlowing_N_2A
Candidatus_Saccharibacteria_bacterium_RIFCSPLOWO2_02_FULL_46_7	1.39866	0.0132277	Mulching/DeepPlowing_N_2A
Streptomyces_turgidiscabies	1.39832	0.00563554	Mulching/DeepPlowing_N_2A
Spirochaetes_bacterium_RBG_13_51_14	1.39698	0.0369884	Mulching/DeepPlowing_G_2A
archaeon_HR06	-1.3966	0.0106129	Mulching/DeepPlowing_G_2A
Comamonas_sp._A23	1.39653	0.0108628	Mulching/DeepPlowing_G_2A
Streptomyces_sp._SID5926	1.3963	0.0369884	Mulching/DeepPlowing_G_2A
Acidobacteria_bacterium_RIFCSPLOWO2_02_FULL_68_18	-1.39485	0.00563554	Mulching/DeepPlowing_G_2A
Nitrospirae_bacterium_RBG_19FT_COMBO_58_9	-1.39353	0.00275607	Mulching/DeepPlowing_G_2A
Candidatus_Rokubacteria_bacterium_13_1_20CM_4_68_9	-1.39352	0.00399013	Mulching/DeepPlowing_G_2A
Streptomyces_virus_Hiyaa	1.39242	0.0159897	Mulching/DeepPlowing_G_2A
Pseudomonas_coronafaciens	1.39238	0.00363499	Mulching/DeepPlowing_G_2A
Streptomyces_phage_Muntaha	1.39182	0.0399835	Mulching/DeepPlowing_N_2A
Streptomyces_pharetrae	1.39129	0.0053165	Mulching/DeepPlowing_N_2A
Acidobacteria_bacterium_13_1_40CM_4_65_8	-1.39091	0.00777458	Mulching/DeepPlowing_G_2A
Acidobacteria_bacterium_RIFCSPLOWO2_12_FULL_59_11	-1.39056	0.000164541	Mulching/DeepPlowing_G_2A
Bdellovibrionales_bacterium_RIFOXYC1_FULL_54_43	1.38991	0.0354177	Mulching/DeepPlowing_G_2A
Streptomyces_sp._8K308	1.38919	0.0399835	Mulching/DeepPlowing_N_2A
Faustovirus	1.38802	0.0110555	Mulching/DeepPlowing_N_2A
Betaproteobacteria_bacterium_HGW-Betaproteobacteria-3	1.38764	0.0314685	Mulching/DeepPlowing_G_2A
Ganoderma_sinense	1.38606	0.0265857	Mulching/DeepPlowing_G_2A
Betaproteobacteria_bacterium_SG8_41	-1.38566	0.00185109	Mulching/DeepPlowing_G_2A
Betaproteobacteria_bacterium	-1.3855	0.00123406	Mulching/DeepPlowing_G_2A
Marseillevirus_LCMAC101	1.38483	0.00267396	Mulching/DeepPlowing_G_2A
Ornithobacterium_rhinotracheale	1.38409	0.0018486	Mulching/DeepPlowing_G_2A
Oerskovia_enterophila	1.38401	0.0106129	Mulching/DeepPlowing_N_2A
Streptomyces_phage_PherryCruz	1.38396	0.00883277	Mulching/DeepPlowing_N_2A
Candidatus_Riflebacteria_bacterium	1.38308	0.0314685	Mulching/DeepPlowing_G_2A
Hungateiclostridium_thermocellum	1.38263	0.00480135	Mulching/DeepPlowing_G_2A
Kutzneria_albida	1.38221	0.0106129	Mulching/DeepPlowing_G_2A
Pseudomonas_fluorescens	1.38213	0.00275607	Mulching/DeepPlowing_G_2A
Streptomyces_sp._RLB1-9	1.38186	0.0106129	Mulching/DeepPlowing_G_2A
Flavobacterium_sp._102	1.38165	0.0296561	Mulching/DeepPlowing_G_2A
Gordonia_phage_Rickmore	1.3815	0.000960753	Mulching/DeepPlowing_G_2A
Rhizobium_sp._MHM7A	1.38006	0.0120418	Mulching/DeepPlowing_N_2A
candidate_division_WWE3_bacterium_GW2011_GWA1_41_8	1.37998	0.014177	Mulching/DeepPlowing_G_2A
Golovinomyces_cichoracearum	1.37966	0.0216164	Mulching/DeepPlowing_N_2A
Gloeocapsopsis_sp._AAB1_=_1H9	-1.37944	0.0187577	Mulching/DeepPlowing_N_2A
Cellulomonas_iranensis	1.37808	0.0271959	Mulching/DeepPlowing_N_2A
bacterium_(Candidatus_Blackallbacteria)_CG13_big_fil_rev_8_21_14_2_50_49_14	1.37739	0.0244344	Mulching/DeepPlowing_G_2A
Streptomyces_griseoruber	1.3773	0.0304245	Mulching/DeepPlowing_N_2A
Treponema_endosymbiont_of_Eucomonympha_sp.	1.37729	0.0053165	Mulching/DeepPlowing_G_2A
Tenacibaculum_maritimum	1.37719	0.0104046	Mulching/DeepPlowing_N_2A
Thiomonas_sp._CB2	1.37708	0.0418353	Mulching/DeepPlowing_G_2A
Asaia_bogorensis	1.37609	0.0314685	Mulching/DeepPlowing_N_2A
Acidobacteria_bacterium_13_1_20CM_2_65_9	-1.37536	0.00777458	Mulching/DeepPlowing_G_2A
Thermoleophilia_bacterium	-1.37523	0.00777458	Mulching/DeepPlowing_G_2A
Euryarchaeota_archaeon_TMED97	1.37463	0.0120418	Mulching/DeepPlowing_G_2A
Candidatus_Sungbacteria_bacterium_RIFCSPLOWO2_12_FULL_41_11	1.37448	0.0183534	Mulching/DeepPlowing_G_2A
Polaromonas_sp._EUR3_1.2.1	1.37427	0.0187577	Mulching/DeepPlowing_G_2A
Nocardia_cerradoensis	1.3739	0.0339769	Mulching/DeepPlowing_N_2A
Parcubacteria_group_bacterium_GW2011_GWB1_49_7	1.37337	0.0124763	Mulching/DeepPlowing_G_2A
Gordonia_sihwensis	1.37334	0.045356	Mulching/DeepPlowing_N_2A
Comamonas_sp._NLF-7-7	1.37239	0.0244344	Mulching/DeepPlowing_G_2A
Candidatus_Brocadiaceae_bacterium_B188	-1.37207	0.00123406	Mulching/DeepPlowing_G_2A
Streptomyces_phage_Gilson	1.37187	0.0269581	Mulching/DeepPlowing_N_2A
Paraglaciecola_sp.	1.37168	0.0496449	Mulching/DeepPlowing_G_2A
Caulobacter_phage_Cr30	1.3716	0.0335742	Mulching/DeepPlowing_N_2A
Paenibacillus_koleovorans	1.37151	0.00567379	Mulching/DeepPlowing_G_2A
Streptomyces_griseofuscus	1.37111	0.0244344	Mulching/DeepPlowing_G_2A
Leptolyngbya_sp._SIO4C5	-1.37091	0.0399835	Mulching/DeepPlowing_N_2A
Rhodospirillales_bacterium_RIFCSPLOWO2_12_FULL_67_15	-1.37087	0.000781571	Mulching/DeepPlowing_G_2A
Pedobacter_cryoconitis	1.37016	0.0399835	Mulching/DeepPlowing_G_2A
Gemmatimonadetes_bacterium_13_2_20CM_2_69_23	-1.36988	0.00123406	Mulching/DeepPlowing_G_2A
Streptomyces_pharetrae	1.36964	0.0371401	Mulching/DeepPlowing_G_2A
Chloroflexi_bacterium_RBG_16_70_13	-1.36959	0.00563554	Mulching/DeepPlowing_G_2A
Oxalobacteraceae_bacterium_AB_14	1.36945	0.0165499	Mulching/DeepPlowing_G_2A
Candidatus_Saccharibacteria_bacterium_GW2011_GWC2_44_17	1.36917	0.000569872	Mulching/DeepPlowing_N_2A
Marinobacter_santoriniensis	1.3686	0.0331491	Mulching/DeepPlowing_N_2A
Fusarium_coffeatum	1.36853	0.00253807	Mulching/DeepPlowing_G_2A
Marinomonas_posidonica	-1.3681	0.00147011	Mulching/DeepPlowing_G_2A
Janthinobacterium_sp._CG23_2	1.36809	0.0314685	Mulching/DeepPlowing_G_2A
Streptomyces_sp._A1277	1.36761	0.0141917	Mulching/DeepPlowing_N_2A
Betaproteobacteria_bacterium_RIFCSPLOWO2_02_FULL_67_26	-1.36752	0.00275607	Mulching/DeepPlowing_G_2A
Streptomyces_sp._GP55	-1.36704	0.00147011	Mulching/DeepPlowing_G_2A
Delftia_sp._K82	1.36679	0.0271325	Mulching/DeepPlowing_G_2A
Novosphingobium_sp._17-62-8	1.36553	0.0308817	Mulching/DeepPlowing_G_2A
Aquitalea_sp._THG-DN7.12	1.3655	0.0117204	Mulching/DeepPlowing_G_2A
Paludibacter_sp.	1.36548	0.0244344	Mulching/DeepPlowing_G_2A
Candidatus_Magasanikbacteria_bacterium_RIFCSPHIGHO2_02_FULL_51_14	1.36539	0.0139501	Mulching/DeepPlowing_G_2A
Syntrophobacterales_bacterium_CG03_land_8_20_14_0_80_58_14	-1.36524	0.00123406	Mulching/DeepPlowing_G_2A
Pseudomonas_sp._ATCC_13867	1.36524	0.00777458	Mulching/DeepPlowing_G_2A
Streptomyces_sp._KhCrAH-43	1.36523	0.014042	Mulching/DeepPlowing_G_2A
Variovorax_sp._HW608	1.3651	0.0244344	Mulching/DeepPlowing_G_2A
Candidatus_Saccharibacteria_bacterium_32-45-3	1.36428	0.0456763	Mulching/DeepPlowing_G_2A
Enterobacter_sp._RHBSTW-00994	-1.36415	0.00616675	Mulching/DeepPlowing_G_2A
Rhodobacteraceae_bacterium_R_SAG2	1.36328	0.0445654	Mulching/DeepPlowing_G_2A
Candidatus_Nitrososphaera_sp._13_1_40CM_48_12	-1.36325	0.00275607	Mulching/DeepPlowing_G_2A
Vibrio_sp._PID23_8	1.36291	0.0053165	Mulching/DeepPlowing_G_2A
Deltaproteobacteria_bacterium_RIFCSPHIGHO2_02_FULL_60_17	-1.36277	0.00275607	Mulching/DeepPlowing_G_2A
Curvibacter_sp._PAE-UM	1.35957	0.0244344	Mulching/DeepPlowing_G_2A
Sinorhizobium_meliloti	1.35911	0.0244344	Mulching/DeepPlowing_G_2A
Streptomyces_malaysiensis	1.35889	0.0399835	Mulching/DeepPlowing_N_2A
Novosphingobium_sp._KN65.2	1.35811	0.0399835	Mulching/DeepPlowing_G_2A
Terrabacter_sp._SLBN-196	1.35793	0.0187577	Mulching/DeepPlowing_G_2A
Candidatus_Rokubacteria_bacterium_13_1_40CM_69_96	-1.35762	0.0141917	Mulching/DeepPlowing_N_2A
Bacillus_thermozeamaize	-1.35757	0.00275607	Mulching/DeepPlowing_N_2A
Streptomyces_showdoensis	1.35696	0.0124763	Mulching/DeepPlowing_N_2A
Aspergillus_calidoustus	1.35621	0.0053165	Mulching/DeepPlowing_N_2A
Kingella_oralis	1.35553	0.0338606	Mulching/DeepPlowing_G_2A
Ottowia_sp._Marseille-P4747	1.35503	0.027555	Mulching/DeepPlowing_N_2A
Organic_Lake_phycodnavirus_1	1.35502	0.0053165	Mulching/DeepPlowing_G_2A
Streptomyces_sp._SAJ15	1.35476	0.0399835	Mulching/DeepPlowing_N_2A
Streptomyces_phage_Daubenski	1.35474	0.0165499	Mulching/DeepPlowing_N_2A
Janthinobacterium_sp._PC23-8	1.35473	0.0399835	Mulching/DeepPlowing_G_2A
Caulobacter_virus_CcrPW	1.35429	0.045356	Mulching/DeepPlowing_N_2A
Candidatus_Rokubacteria_bacterium_RIFCSPLOWO2_12_FULL_71_22	-1.35357	0.0314685	Mulching/DeepPlowing_N_2A
Escherichia_phage_Halfdan	1.35356	0.0114161	Mulching/DeepPlowing_N_2A
uncultured_Acidobacteria_bacterium_A3	-1.35342	0.0104046	Mulching/DeepPlowing_G_2A
candidate_division_WWE3_bacterium_CSP1-7	1.35316	0.0108604	Mulching/DeepPlowing_G_2A
Streptomyces_violaceusniger	1.35315	0.0244344	Mulching/DeepPlowing_G_2A
Thaumarchaeota_archaeon_13_1_40CM_3_38_6	-1.35239	0.0244344	Mulching/DeepPlowing_N_2A
Chitinimonas_sp._BJB300	1.3522	0.0244344	Mulching/DeepPlowing_G_2A
Streptomyces_sp._NBRC_109706	1.35206	0.00355146	Mulching/DeepPlowing_N_2A
Pseudomonas_sp._PS24	-1.3518	0.0314685	Mulching/DeepPlowing_G_2A
candidate_division_TM6_bacterium_GW2011_GWF2_33_332	1.35115	0.0496449	Mulching/DeepPlowing_G_2A
Burkholderia_seminalis	1.35045	0.0399835	Mulching/DeepPlowing_N_2A
Chitinophaga_pinensis	1.35034	0.0187577	Mulching/DeepPlowing_N_2A
Streptomyces_griseorubiginosus	1.34977	0.00777458	Mulching/DeepPlowing_N_2A
Acidobacteria_bacterium_RIFCSPLOWO2_02_FULL_59_13	-1.34929	0.00275607	Mulching/DeepPlowing_G_2A
Deltaproteobacteria_bacterium_RIFCSPLOWO2_02_FULL_47_10	1.3483	0.0338606	Mulching/DeepPlowing_G_2A
Paraburkholderia_steynii	1.34793	0.0399835	Mulching/DeepPlowing_G_2A
Catelliglobosispora_koreensis	1.3467	0.0314685	Mulching/DeepPlowing_G_2A
Alphaproteobacteria_bacterium_HGW-Alphaproteobacteria-15	1.34643	0.0244344	Mulching/DeepPlowing_G_2A
Cytophaga_hutchinsonii	1.34603	0.0141917	Mulching/DeepPlowing_G_2A
Spirobacillus_cienkowskii	1.34598	0.00825594	Mulching/DeepPlowing_G_2A
Marinobacter_sp._T13-3	1.34576	0.0412001	Mulching/DeepPlowing_G_2A
Streptomyces_sp._PSKA28	1.34573	0.0399835	Mulching/DeepPlowing_N_2A
Gramella_gaetbulicola	-1.34571	0.00189222	Mulching/DeepPlowing_G_2A
Providencia_alcalifaciens	1.34547	0.0214137	Mulching/DeepPlowing_N_2A
Candidatus_Yanofskybacteria_bacterium_RIFOXYD1_FULL_42_10	1.34445	0.0108628	Mulching/DeepPlowing_G_2A
Candidatus_Dactylopiibacterium_carminicum	1.34437	0.0244344	Mulching/DeepPlowing_G_2A
Paraburkholderia_sp._7MH5	1.34299	0.0187577	Mulching/DeepPlowing_N_2A
Streptomyces_sp._OK885	-1.34279	0.00563554	Mulching/DeepPlowing_G_2A
Nocardioides_baekrokdamisoli	1.34275	0.0314685	Mulching/DeepPlowing_G_2A
Trichosporon_asahii	1.34259	0.00450622	Mulching/DeepPlowing_G_2A
Spirochaetaceae_bacterium	1.34253	0.0399835	Mulching/DeepPlowing_G_2A
Streptomyces_tateyamensis	1.34243	0.00777458	Mulching/DeepPlowing_N_2A
Gallionellales_bacterium_39-52-133	1.34203	0.0187577	Mulching/DeepPlowing_G_2A
Hyaloscypha_variabilis	1.34199	0.0053165	Mulching/DeepPlowing_G_2A
bacterium_TMED198	1.34146	0.0456763	Mulching/DeepPlowing_G_2A
Bacillaceae_bacterium_SIJ1	-1.3409	0.000358194	Mulching/DeepPlowing_G_2A
Pontibacter_sp._HB172049	1.34063	0.00275607	Mulching/DeepPlowing_N_2A
Betaproteobacteria_bacterium_13_1_40CM_4_64_4	-1.34026	0.00185109	Mulching/DeepPlowing_G_2A
Gilliamella_apicola	1.34021	0.0399835	Mulching/DeepPlowing_N_2A
Candidatus_Kentron_sp._FM	1.3396	0.0203451	Mulching/DeepPlowing_G_2A
Acidovorax_sp._T1	1.33938	0.0337003	Mulching/DeepPlowing_N_2A
Sphingomonas_sp._LK11	1.33927	0.00323459	Mulching/DeepPlowing_G_2A
Acidobacteria_bacterium_RIFCSPLOWO2_12_FULL_68_19	-1.33836	0.00777458	Mulching/DeepPlowing_G_2A
uncultured_beta_proteobacterium_Rifle_16ft_4_minimus_10522	-1.33817	0.00469675	Mulching/DeepPlowing_G_2A
Candidatus_Rokubacteria_bacterium_RIFCSPHIGHO2_02_FULL_73_26	-1.33788	0.0399835	Mulching/DeepPlowing_N_2A
Betaproteobacteria_bacterium_RIFCSPLOWO2_12_FULL_62_13b	-1.3364	0.000781571	Mulching/DeepPlowing_G_2A
Flavobacterium_cauense	-1.33523	0.00563554	Mulching/DeepPlowing_G_2A
Clostridium_sporogenes	1.33513	0.0235696	Mulching/DeepPlowing_G_2A
Streptosporangium_roseum	1.3351	0.00777458	Mulching/DeepPlowing_N_2A
Arthrobacter_sp._GMC3	1.33434	0.0108604	Mulching/DeepPlowing_N_2A
Taibaiella_sp._KVB11	1.33419	0.045356	Mulching/DeepPlowing_G_2A
Nitrospira_sp._SB0675_bin_23	1.33351	0.047584	Mulching/DeepPlowing_G_2A
Paraburkholderia_sp._T12-10	1.3331	0.00463274	Mulching/DeepPlowing_G_2A
Betaproteobacteria_bacterium_RBG_16_66_20	-1.33307	0.00399013	Mulching/DeepPlowing_G_2A
Streptomyces_virus_Mildred21	1.3324	0.0170611	Mulching/DeepPlowing_N_2A
Mycobacterium_paraffinicum	-1.33196	0.00355146	Mulching/DeepPlowing_G_2A
Pedobacter_sp._SG918	1.33196	0.0026255	Mulching/DeepPlowing_N_2A
Oceanisphaera_arctica	1.33188	0.0244344	Mulching/DeepPlowing_N_2A
Aquimarina_algiphila	1.33138	0.0053165	Mulching/DeepPlowing_G_2A
Acinetobacter_venetianus	1.33096	0.0229511	Mulching/DeepPlowing_N_2A
Bdellovibrio_phage_phi1422	1.33069	0.0338606	Mulching/DeepPlowing_N_2A
Yersinia_frederiksenii	1.33038	0.0208912	Mulching/DeepPlowing_G_2A
Macrophomina_phaseolina	1.33016	0.00833652	Mulching/DeepPlowing_N_2A
Actinopolyspora_erythraea	1.32832	0.00123406	Mulching/DeepPlowing_N_2A
Gordonia_phage_Secretariat	1.32804	0.0235696	Mulching/DeepPlowing_G_2A
Streptomyces_durhamensis	-1.32767	0.0106129	Mulching/DeepPlowing_G_2A
Streptomyces_phage_Moozy	1.32705	0.0308817	Mulching/DeepPlowing_N_2A
Pseudomonas_sp._R32	1.32697	0.00664093	Mulching/DeepPlowing_N_2A
Aeromonas_dhakensis	-1.32672	0.000781571	Mulching/DeepPlowing_G_2A
Candidatus_Nomurabacteria_bacterium_RIFOXYC2_FULL_36_19	1.32626	0.00185132	Mulching/DeepPlowing_G_2A
Mimivirus_AB-566-O17	-1.32619	0.00608743	Mulching/DeepPlowing_G_2A
Betaproteobacteria_bacterium_RIFCSPLOWO2_02_FULL_62_17	-1.32599	0.000493624	Mulching/DeepPlowing_G_2A
Monosporascus_sp._mg162	1.32589	0.0110555	Mulching/DeepPlowing_G_2A
Actinobacteria_bacterium_RBG_16_67_10	-1.32582	0.00399013	Mulching/DeepPlowing_G_2A
Aquimarina_agarilytica	1.32469	0.00967768	Mulching/DeepPlowing_G_2A
Ophiocordyceps_unilateralis	1.32388	0.0053165	Mulching/DeepPlowing_G_2A
Polynucleobacter_sp._UB-Domo-W1	1.32334	0.0379494	Mulching/DeepPlowing_G_2A
Actinobacteria_bacterium_13_1_40CM_2_65_8	-1.32205	0.00469675	Mulching/DeepPlowing_G_2A
Bifidobacterium_pseudolongum	1.32111	0.00363499	Mulching/DeepPlowing_N_2A
Marinobacter_changyiensis	1.32095	0.0401464	Mulching/DeepPlowing_G_2A
Alphaproteobacteria_bacterium_MarineAlpha4_Bin1	-1.31948	0.000493624	Mulching/DeepPlowing_G_2A
Microbispora_rosea	1.31915	0.00185109	Mulching/DeepPlowing_N_2A
Gemmatimonadetes_bacterium_13_1_40CM_4_65_7	-1.31903	0.000493624	Mulching/DeepPlowing_G_2A
Novosphingobium_rosa	1.31871	0.0106129	Mulching/DeepPlowing_G_2A
Candidatus_Rokubacteria_bacterium_13_2_20CM_69_10	-1.31833	0.0104046	Mulching/DeepPlowing_G_2A
Syncephalis_pseudoplumigaleata	1.31793	0.0244344	Mulching/DeepPlowing_G_2A
Prevotella_histicola	1.31718	0.0456763	Mulching/DeepPlowing_N_2A
bacterium_(Candidatus_Gribaldobacteria)_CG23_combo_of_CG06-09_8_20_14_all_37_87_8	1.31716	0.0139501	Mulching/DeepPlowing_G_2A
Microgenomates_group_bacterium_GW2011_GWA2_46_16	1.31712	0.0171513	Mulching/DeepPlowing_N_2A
candidate_division_WWE3_bacterium_RIFOXYD1_FULL_40_11	1.3163	0.0376219	Mulching/DeepPlowing_G_2A
Candidatus_Thalassarchaeum_sp.	1.31609	0.0345474	Mulching/DeepPlowing_G_2A
Candidatus_Omnitrophica_bacterium_CG_4_10_14_0_8_um_filter_43_18	1.3158	0.0291715	Mulching/DeepPlowing_G_2A
Fluviicola_sp._RIFCSPHIGHO2_12_FULL_43_24	1.31513	0.00399013	Mulching/DeepPlowing_N_2A
Nocardioides_aromaticivorans	1.31492	0.0314685	Mulching/DeepPlowing_N_2A
Flammeovirgaceae_bacterium	1.31439	0.0314685	Mulching/DeepPlowing_N_2A
Candidatus_Saccharibacteria_bacterium_CG10_big_fil_rev_8_21_14_0_10_47_8	1.31436	0.0141917	Mulching/DeepPlowing_N_2A
Candidatus_Yanofskybacteria_bacterium_RIFCSPLOWO2_02_FULL_47_9b	1.31407	0.0139501	Mulching/DeepPlowing_G_2A
Colletotrichum_chlorophyti	1.31344	0.0412001	Mulching/DeepPlowing_G_2A
Streptomyces_rubrogriseus	1.31327	0.0159897	Mulching/DeepPlowing_N_2A
Candidatus_Rokubacteria_bacterium_13_1_40CM_3_69_38	-1.31315	0.0170611	Mulching/DeepPlowing_G_2A
Sphingobacteriales_bacterium_UPWRP_1	1.31311	0.0399835	Mulching/DeepPlowing_G_2A
Alteromonas_sp._ALT199	1.31268	0.036411	Mulching/DeepPlowing_G_2A
Candidatus_Rokubacteria_bacterium_13_1_40CM_4_67_11	-1.31256	0.00803887	Mulching/DeepPlowing_G_2A
Ophiocordyceps_camponoti-rufipedis	1.31214	0.014042	Mulching/DeepPlowing_N_2A
Streptomyces_griseorubens	1.31149	0.0296561	Mulching/DeepPlowing_N_2A
Marinobacter_sp._ZYF650	1.31119	0.0337003	Mulching/DeepPlowing_G_2A
Bordetella_sp._J329	1.31042	0.0203451	Mulching/DeepPlowing_G_2A
Clavibacter_virus_CN1A	1.30886	0.036411	Mulching/DeepPlowing_G_2A
Candidatus_Woesebacteria_bacterium_RIFOXYD1_FULL_33_11	1.30845	0.0139501	Mulching/DeepPlowing_N_2A
Thermoanaerobaculia_bacterium	-1.30786	0.000287947	Mulching/DeepPlowing_G_2A
Oscillatoriales_cyanobacterium_JSC-12	1.3069	0.0314685	Mulching/DeepPlowing_G_2A
Alkanindiges_illinoisensis	1.30521	0.0244344	Mulching/DeepPlowing_G_2A
Riemerella_columbina	1.30422	0.00133923	Mulching/DeepPlowing_G_2A
Betaproteobacteria_bacterium_RIFCSPLOWO2_02_FULL_64_12	-1.30413	0.000781571	Mulching/DeepPlowing_G_2A
Streptomyces_purpurogeneiscleroticus	1.30389	0.027555	Mulching/DeepPlowing_G_2A
Saccharothrix_ecbatanensis	1.30378	0.0106129	Mulching/DeepPlowing_N_2A
Porphyrobacter_neustonensis	1.30364	0.0106129	Mulching/DeepPlowing_G_2A
Polynucleobacter_sp._35-46-11	1.30293	0.0271325	Mulching/DeepPlowing_G_2A
Novosphingobium_chloroacetimidivorans	1.30172	0.0399835	Mulching/DeepPlowing_G_2A
Freshwater_phage_uvFW-CGR-AMD-COM-C429	1.30023	0.00833652	Mulching/DeepPlowing_G_2A
Streptomyces_sp._HGB0020	1.30021	0.0187577	Mulching/DeepPlowing_N_2A
Diaporthe_ampelina	1.29997	0.00697066	Mulching/DeepPlowing_G_2A
Deltaproteobacteria_bacterium_RIFOXYA2_FULL_55_11	-1.29992	0.00147011	Mulching/DeepPlowing_G_2A
Marinifilum_fragile	1.29961	0.0214137	Mulching/DeepPlowing_G_2A
Blastocatellia_bacterium_AA13	-1.2985	0.000781571	Mulching/DeepPlowing_G_2A
Nocardioides_alkalitolerans	1.29695	0.0187577	Mulching/DeepPlowing_G_2A
Mycolicibacterium_doricum	-1.29688	0.000164541	Mulching/DeepPlowing_G_2A
Monosporascus_sp._CRB-9-2	1.29676	0.0349299	Mulching/DeepPlowing_G_2A
Filimonas_sp.	1.29636	0.0018486	Mulching/DeepPlowing_G_2A
Micromonospora_sp._28ISP2-46	1.29532	0.00825594	Mulching/DeepPlowing_G_2A
Marmoricola_ginsengisoli	1.29474	0.00777458	Mulching/DeepPlowing_N_2A
Allokutzneria_albata	1.29454	0.00123406	Mulching/DeepPlowing_N_2A
Claviceps_purpurea	1.29448	0.0371401	Mulching/DeepPlowing_G_2A
Streptomyces_sp._SID6013	1.29205	0.00803887	Mulching/DeepPlowing_N_2A
Halomonas_shengliensis	1.29101	0.00622372	Mulching/DeepPlowing_G_2A
Pyricularia_pennisetigena	1.29068	0.0159315	Mulching/DeepPlowing_G_2A
Candidatus_Yanofskybacteria_bacterium_RIFCSPLOWO2_01_FULL_49_25	1.29001	0.0399835	Mulching/DeepPlowing_G_2A
Aeromicrobium_flavum	1.28967	0.0106129	Mulching/DeepPlowing_N_2A
Microbacterium_halotolerans	1.28893	0.00622372	Mulching/DeepPlowing_G_2A
Mycobacterium_phage_Nebkiss	1.28882	0.00483039	Mulching/DeepPlowing_G_2A
Methylomarinum_vadi	1.28862	0.00563554	Mulching/DeepPlowing_G_2A
Mesonia_hippocampi	1.28713	0.00825594	Mulching/DeepPlowing_G_2A
Glaciecola_nitratireducens	1.28697	0.0126049	Mulching/DeepPlowing_G_2A
Valsa_mali	1.28674	0.0420777	Mulching/DeepPlowing_G_2A
Saccharopolyspora_antimicrobica	1.28671	0.00563554	Mulching/DeepPlowing_G_2A
Candidatus_Nitrosarchaeum_limnium	-1.28667	0.0104046	Mulching/DeepPlowing_G_2A
Mucilaginibacter_hurinus	1.28587	0.0187577	Mulching/DeepPlowing_N_2A
Cordyceps_fumosorosea	1.2858	0.0053165	Mulching/DeepPlowing_G_2A
Neochlamydia_sp._TUME1	1.28565	0.0379494	Mulching/DeepPlowing_G_2A
Pseudoalteromonas_denitrificans	1.28498	0.0337003	Mulching/DeepPlowing_G_2A
Streptomyces_brevispora	1.28492	0.037878	Mulching/DeepPlowing_G_2A
Candidatus_Rokubacteria_bacterium_13_1_20CM_4_70_14	-1.28473	0.0026661	Mulching/DeepPlowing_G_2A
Alistipes_putredinis	1.28472	0.0018486	Mulching/DeepPlowing_G_2A
Arcobacter_aquimarinus	1.28468	0.0139501	Mulching/DeepPlowing_G_2A
Nocardia_amamiensis	-1.28437	0.00616675	Mulching/DeepPlowing_G_2A
Roseomonas_sp._18066	-1.28399	0.000287947	Mulching/DeepPlowing_G_2A
Fervidobacterium_pennivorans	1.2835	0.0291715	Mulching/DeepPlowing_N_2A
Candidatus_Methylomirabilis_lanthanidiphila	-1.28301	0.00185109	Mulching/DeepPlowing_G_2A
Betaproteobacteria_bacterium_RIFCSPLOWO2_12_FULL_65_110	-1.28281	0.00123406	Mulching/DeepPlowing_G_2A
Acidovorax_sp._106	1.28237	0.0314685	Mulching/DeepPlowing_N_2A
Wallemia_mellicola	1.28233	0.0401464	Mulching/DeepPlowing_G_2A
Pedobacter_sp._Hv1	1.28228	0.0271959	Mulching/DeepPlowing_G_2A
Candidatus_Nomurabacteria_bacterium_CG22_combo_CG10-13_8_21_14_all_32_8	1.28221	0.027555	Mulching/DeepPlowing_G_2A
Cecembia_lonarensis	1.28213	0.0180195	Mulching/DeepPlowing_G_2A
Micromonospora_parathelypteridis	-1.28207	0.0026661	Mulching/DeepPlowing_G_2A
uncultured_bacterium_BLR5	-1.28205	0.0271959	Mulching/DeepPlowing_G_2A
Agrobacterium_rhizogenes	1.28097	0.0399835	Mulching/DeepPlowing_N_2A
Pseudoxanthomonas_sp._X-1	1.28071	0.0244344	Mulching/DeepPlowing_G_2A
Chloroflexi_bacterium	-1.28062	0.00275607	Mulching/DeepPlowing_N_2A
Microgenomates_group_bacterium_ADurb.Bin238	1.2806	0.036411	Mulching/DeepPlowing_G_2A
Anaerolineae_bacterium_CG2_30_64_16	-1.28053	0.0187577	Mulching/DeepPlowing_N_2A
Candidatus_Dadabacteria_bacterium_RBG_19FT_COMBO_40_33	-1.28029	0.000287947	Mulching/DeepPlowing_G_2A
Acidobacteria_bacterium_13_1_40CM_2_64_6	-1.28019	0.00777458	Mulching/DeepPlowing_G_2A
Micromonospora_sp._CNZ322	-1.27893	0.00616675	Mulching/DeepPlowing_G_2A
Aquimarina_sediminis	1.27874	0.00131723	Mulching/DeepPlowing_G_2A
Streptomyces_viridifaciens	-1.27864	0.00123406	Mulching/DeepPlowing_G_2A
Candidatus_Nitrosotenuis_chungbukensis	-1.27855	0.0271959	Mulching/DeepPlowing_N_2A
Thaumarchaeota_archaeon_CSP1-1	-1.27851	0.00355146	Mulching/DeepPlowing_G_2A
Streptomyces_sp._NEAU-sy36	1.27834	0.010286	Mulching/DeepPlowing_G_2A
Candidatus_Rokubacteria_bacterium_13_1_20CM_70_15	-1.27794	0.0170611	Mulching/DeepPlowing_G_2A
Alkanindiges_illinoisensis	1.27772	0.00563554	Mulching/DeepPlowing_N_2A
Propionicimonas_sp.	1.27771	0.010286	Mulching/DeepPlowing_G_2A
Caulobacter_sp._3R27C2-B	-1.27681	0.00185109	Mulching/DeepPlowing_G_2A
Streptomyces_sp._SM12	1.27629	0.0271325	Mulching/DeepPlowing_G_2A
uncultured_Pyrinomonadaceae_bacterium	-1.27628	0.000287947	Mulching/DeepPlowing_G_2A
Fictibacillus_arsenicus	-1.27604	0.00355146	Mulching/DeepPlowing_G_2A
Colletotrichum_tofieldiae	1.27585	0.000960753	Mulching/DeepPlowing_G_2A
Nitrospira_lenta	-1.27462	0.00275607	Mulching/DeepPlowing_G_2A
Streptomyces_sp._sk226	1.27213	0.0187577	Mulching/DeepPlowing_N_2A
Acidobacteria_bacterium_RIFCSPLOWO2_02_FULL_67_21	-1.27171	0.00777458	Mulching/DeepPlowing_G_2A
Scytonema_tolypothrichoides	-1.27163	0.00399013	Mulching/DeepPlowing_N_2A
Paraburkholderia_sp._BL6665CI2N2	-1.27044	0.00123406	Mulching/DeepPlowing_G_2A
Pseudomonas_phage_vB_PaeS_C1	1.27036	0.0139501	Mulching/DeepPlowing_G_2A
Rhizobium_sp._Leaf384	1.27023	0.0496449	Mulching/DeepPlowing_N_2A
Betaproteobacteria_bacterium_RIFCSPLOWO2_12_FULL_64_23	-1.26917	0.00123406	Mulching/DeepPlowing_G_2A
Streptomyces_sp._LUP30	1.26859	0.0304245	Mulching/DeepPlowing_G_2A
Herbaspirillum_chlorophenolicum	1.2676	0.0244344	Mulching/DeepPlowing_G_2A
Streptococcus_agalactiae	-1.26725	0.00185109	Mulching/DeepPlowing_G_2A
Chitinophaga_pinensis	1.26645	0.0187577	Mulching/DeepPlowing_G_2A
Pseudomonas_sp._HMWF031	1.26613	0.0018486	Mulching/DeepPlowing_G_2A
Demequina_oxidasica	1.26481	0.0418353	Mulching/DeepPlowing_G_2A
Deltaproteobacteria_bacterium_CSP1-8	-1.26445	0.00275607	Mulching/DeepPlowing_G_2A
Symploca_sp._SIO2B6	-1.26444	0.000164541	Mulching/DeepPlowing_G_2A
Chromohalobacter_salexigens	1.26405	0.00567379	Mulching/DeepPlowing_G_2A
Streptomyces_sp._SLBN-118	1.26384	0.0468311	Mulching/DeepPlowing_N_2A
Desulfomicrobium_orale	1.26373	0.0244344	Mulching/DeepPlowing_N_2A
Burkholderia_sp._Ch1-1	1.26341	0.0133708	Mulching/DeepPlowing_N_2A
Elioraea_thermophila	-1.2632	0.00777458	Mulching/DeepPlowing_G_2A
Pseudomonas_sp._MT-1	1.26285	0.00743216	Mulching/DeepPlowing_G_2A
Desulfobulbus_propionicus	1.26282	0.00777458	Mulching/DeepPlowing_G_2A
Syntrophobacterales_bacterium_GWC2_56_13	-1.26243	0.000287947	Mulching/DeepPlowing_G_2A
Acidobacteria_bacterium_37-71-11	-1.26228	0.0314685	Mulching/DeepPlowing_N_2A
Streptomyces_phage_Gibson	1.26177	0.0468311	Mulching/DeepPlowing_G_2A
Parabacteroides_sp._AF17-28	1.26146	0.0338606	Mulching/DeepPlowing_G_2A
Rhizobium_sp._SJZ105	1.26141	0.0203451	Mulching/DeepPlowing_N_2A
Candidatus_Glassbacteria_bacterium_RIFCSPLOWO2_12_FULL_58_11	-1.26134	4.11353e-05	Mulching/DeepPlowing_G_2A
Polynucleobacter_sp._39-46-10	1.26087	0.0271325	Mulching/DeepPlowing_G_2A
Bacteroidales_bacterium	1.25977	0.0399835	Mulching/DeepPlowing_G_2A
Leptospira_ryugenii	1.25892	0.00608743	Mulching/DeepPlowing_G_2A
Streptomyces_koyangensis	-1.25877	0.00195507	Mulching/DeepPlowing_G_2A
Candidatus_Daviesbacteria_bacterium_RIFCSPHIGHO2_01_FULL_44_29	1.25864	0.0338606	Mulching/DeepPlowing_G_2A
Candidatus_Rokubacteria_bacterium_RIFCSPHIGHO2_02_FULL_69_13	-1.25812	0.0133708	Mulching/DeepPlowing_G_2A
Sphingomonas_rubra	1.25729	0.00563554	Mulching/DeepPlowing_G_2A
Candidatus_Nomurabacteria_bacterium_GW2011_GWA2_43_15	1.25721	0.0354177	Mulching/DeepPlowing_G_2A
Arthrobacter_sp._HMWF013	-1.2564	0.00777458	Mulching/DeepPlowing_G_2A
Venustampulla_echinocandica	1.25633	0.0053165	Mulching/DeepPlowing_G_2A
Gemmatimonadetes_bacterium_13_1_40CM_2_60_3	-1.25629	0.000493624	Mulching/DeepPlowing_G_2A
Marinobacter_sp._Arc7-DN-1	1.25617	0.0290153	Mulching/DeepPlowing_G_2A
Burkholderia_sp._AU28863	1.25613	0.0291715	Mulching/DeepPlowing_N_2A
Pseudomonas_guineae	1.25573	0.0159897	Mulching/DeepPlowing_G_2A
Acidobacteria_bacterium_RIFCSPLOWO2_12_FULL_67_14	-1.25509	0.00777458	Mulching/DeepPlowing_G_2A
Candidatus_Jorgensenbacteria_bacterium_GW2011_GWB1_49_9	1.25467	0.0456763	Mulching/DeepPlowing_G_2A
TM7_phylum_sp._oral_taxon_352	1.25435	0.00797156	Mulching/DeepPlowing_G_2A
Streptomyces_flavidovirens	-1.2543	0.0106129	Mulching/DeepPlowing_G_2A
Candidatus_Saccharibacteria_bacterium_RIFCSPHIGHO2_12_FULL_47_16	1.25408	0.0018486	Mulching/DeepPlowing_G_2A
Gammaproteobacteria_bacterium_2W06	1.25401	0.014042	Mulching/DeepPlowing_G_2A
Gordonia_phage_Ranch	1.25387	0.045811	Mulching/DeepPlowing_G_2A
Pseudactinotalea_suaedae	1.25377	0.0244344	Mulching/DeepPlowing_N_2A
Candidatus_Andersenbacteria_bacterium_RIFCSPLOWO2_02_FULL_46_11	1.25261	0.0227205	Mulching/DeepPlowing_G_2A
Streptomyces_phage_SendItCS	1.25123	0.00797156	Mulching/DeepPlowing_N_2A
Acidobacteria_bacterium_13_1_40CM_2_56_11	-1.25118	0.0187577	Mulching/DeepPlowing_G_2A
candidate_division_NC10_bacterium_RIFCSPLOWO2_12_FULL_66_18	-1.25092	0.000781571	Mulching/DeepPlowing_G_2A
Chlamydia_sp._32-24	1.25089	0.00480135	Mulching/DeepPlowing_G_2A
Sphingosinithalassobacter_sp._zrk23	-1.25076	0.0314685	Mulching/DeepPlowing_N_2A
Candidatus_Uhrbacteria_bacterium_RIFCSPLOWO2_01_FULL_53_9	1.24989	0.047584	Mulching/DeepPlowing_N_2A
Pseudomonas_viridiflava	1.24968	0.0399835	Mulching/DeepPlowing_G_2A
Thaumarchaeota_archaeon_13_1_40CM_38_12	-1.24965	0.0104046	Mulching/DeepPlowing_G_2A
Rhodococcus_sp._KBS0724	-1.24959	0.0216164	Mulching/DeepPlowing_G_2A
Rhizobium_sp._GV031	1.24952	0.00635079	Mulching/DeepPlowing_G_2A
Candidatus_Rokubacteria_bacterium_13_2_20CM_2_64_8	-1.24937	0.0133708	Mulching/DeepPlowing_G_2A
TM7_phylum_sp._oral_taxon_349	1.24903	0.00360816	Mulching/DeepPlowing_N_2A
candidate_division_WWE3_bacterium_RBG_19FT_COMBO_53_11	1.24898	0.00622372	Mulching/DeepPlowing_G_2A
Chitinophaga_niastensis	1.24819	0.0399835	Mulching/DeepPlowing_G_2A
Candidatus_Rokubacteria_bacterium_CSP1-6	-1.24774	0.0187577	Mulching/DeepPlowing_N_2A
Mycobacterium_phage_Piper2020	1.24613	0.00493457	Mulching/DeepPlowing_G_2A
Methanothrix_soehngenii	-1.24603	0.00469675	Mulching/DeepPlowing_G_2A
Bacteroides_phage_crAss001	1.24596	0.0354177	Mulching/DeepPlowing_N_2A
Shewanella_sp._CG18_big_fil_WC_8_21_14_2_50_42_11	1.2455	0.00563554	Mulching/DeepPlowing_N_2A
Aquimarina_sp._I32.4	1.24519	0.0133838	Mulching/DeepPlowing_G_2A
Gemmatimonas_sp._13_1_20CM_3_60_15	-1.24515	0.000781571	Mulching/DeepPlowing_G_2A
Candidatus_Accumulibacter_sp._BA-94	1.24491	0.0314685	Mulching/DeepPlowing_G_2A
Burkholderia_sp._604	1.24481	0.00198159	Mulching/DeepPlowing_G_2A
Herbaspirillum_robiniae	1.24389	0.0106129	Mulching/DeepPlowing_G_2A
Cronobacter_dublinensis	1.24347	0.0117204	Mulching/DeepPlowing_G_2A
Labilibaculum_filiforme	1.24284	0.0379494	Mulching/DeepPlowing_G_2A
Acinetobacter_bereziniae	1.24261	0.0269581	Mulching/DeepPlowing_N_2A
Ruegeria_sp._HKCCD6604	1.2426	0.0379494	Mulching/DeepPlowing_G_2A
Theionarchaea_archaeon_DG-70-1	1.2418	0.0308817	Mulching/DeepPlowing_G_2A
Podoviridae_sp._ctpVR23	1.24157	0.0338606	Mulching/DeepPlowing_N_2A
Marinobacter_persicus	1.24135	0.00429977	Mulching/DeepPlowing_G_2A
Streptomyces_sp._SID7805	-1.24057	0.0026661	Mulching/DeepPlowing_G_2A
Candidatus_Protochlamydia_massiliensis	1.24023	0.045356	Mulching/DeepPlowing_G_2A
Streptomyces_sp._C	1.2401	0.0104046	Mulching/DeepPlowing_N_2A
Sphingomonas_ginsenosidivorax	1.24005	0.0141917	Mulching/DeepPlowing_G_2A
Candidatus_Rubidus_massiliensis	1.23994	0.0229511	Mulching/DeepPlowing_G_2A
Parabacteroides_distasonis	1.23951	0.00254545	Mulching/DeepPlowing_N_2A
Cyanobacteria_bacterium_13_1_40CM_2_61_4	-1.23927	0.00563554	Mulching/DeepPlowing_G_2A
Micropruina_glycogenica	1.23855	0.0269581	Mulching/DeepPlowing_N_2A
Ophiocordyceps_camponoti-leonardi_(nom._inval.)	1.23843	0.0349299	Mulching/DeepPlowing_G_2A
Burkholderia_sp._YR290	-1.23831	0.00275607	Mulching/DeepPlowing_G_2A
Nocardia_vinacea	1.23818	0.0159897	Mulching/DeepPlowing_N_2A
Arcobacter_aquimarinus	1.23791	0.0338606	Mulching/DeepPlowing_N_2A
Nitrospira_bacterium_SG8_35_4	1.23765	0.0187577	Mulching/DeepPlowing_G_2A
Chitinophaga_sp._1303	1.23752	0.0399835	Mulching/DeepPlowing_G_2A
Omnitrophica_WOR_2_bacterium_RIFCSPHIGHO2_02_FULL_68_15	-1.23709	0.00275607	Mulching/DeepPlowing_G_2A
Streptomyces_vinaceus	1.2365	0.0468311	Mulching/DeepPlowing_N_2A
Streptomyces_sp._SS1-1	1.23627	0.0141917	Mulching/DeepPlowing_N_2A
Pyrinomonas_methylaliphatogenes	-1.23624	0.00399013	Mulching/DeepPlowing_G_2A
Pseudomonas_sp._MYb60	1.23593	0.0304245	Mulching/DeepPlowing_G_2A
Nitrospira_sp._LK70	-1.23534	0.000493624	Mulching/DeepPlowing_G_2A
Nostoc_sp._106C	-1.2351	0.000493624	Mulching/DeepPlowing_G_2A
Daldinia_sp._EC12	1.23509	0.0208858	Mulching/DeepPlowing_G_2A
Coprinellus_angulatus	1.235	0.00845504	Mulching/DeepPlowing_N_2A
Eutypa_lata	1.23477	0.0420777	Mulching/DeepPlowing_G_2A
Elioraea_thermophila	-1.23472	0.0314685	Mulching/DeepPlowing_N_2A
Sphingomonadaceae_bacterium_KCTC_52780	-1.23393	0.0106129	Mulching/DeepPlowing_G_2A
Actinopolyspora_xinjiangensis	1.2337	0.0412001	Mulching/DeepPlowing_N_2A
Hortaea_werneckii	1.23361	0.00465346	Mulching/DeepPlowing_G_2A
Microbacterium_sp._67-17	1.23341	0.0216164	Mulching/DeepPlowing_N_2A
Microterricola_gilva	-1.23321	0.00399013	Mulching/DeepPlowing_G_2A
Shewanella_sp._YLB-06	1.23243	0.0120418	Mulching/DeepPlowing_G_2A
Tamlana_sp._UJ94	1.23228	0.0337003	Mulching/DeepPlowing_G_2A
Parcubacteria_group_bacterium_GW2011_GWA2_52_8	1.23227	0.0199881	Mulching/DeepPlowing_G_2A
Chitinophaga_rhizosphaerae	1.23204	0.0187577	Mulching/DeepPlowing_G_2A
Thiomicrorhabdus_indica	1.23202	0.0371401	Mulching/DeepPlowing_G_2A
Deltaproteobacteria_bacterium_CG_4_9_14_3_um_filter_44_9	1.23194	0.0337003	Mulching/DeepPlowing_G_2A
Congregibacter_litoralis	1.23166	0.0399835	Mulching/DeepPlowing_G_2A
bacterium_HR26	-1.23128	0.00399013	Mulching/DeepPlowing_N_2A
candidate_division_TM6_bacterium_GW2011_GWF2_38_10	1.23055	0.0290153	Mulching/DeepPlowing_G_2A
Streptomyces_phaeoluteigriseus	1.2305	0.014042	Mulching/DeepPlowing_N_2A
Halioglobus_sediminis	1.2302	0.00563554	Mulching/DeepPlowing_G_2A
Streptomyces_paludis	1.22984	0.0478485	Mulching/DeepPlowing_G_2A
Streptomyces_sp._F001	-1.22951	0.0104046	Mulching/DeepPlowing_G_2A
Geodermatophilaceae_bacterium_URHA0031	-1.2294	0.00123406	Mulching/DeepPlowing_G_2A
Thaumarchaeota_archaeon_13_1_40CM_4_48_7	-1.22855	0.00616675	Mulching/DeepPlowing_G_2A
Agromyces_sp._Root1464	1.22851	0.0418353	Mulching/DeepPlowing_G_2A
Pseudomonas_sp._v388	-1.2283	0.00616675	Mulching/DeepPlowing_G_2A
Sulfurisoma_sediminicola	1.2267	0.0314685	Mulching/DeepPlowing_G_2A
Streptomyces_sp._Z26	1.22669	0.0141917	Mulching/DeepPlowing_N_2A
Streptomyces_sp._MOE7	-1.22616	0.0104046	Mulching/DeepPlowing_G_2A
Thioalkalivibrio_sp._ALE16	1.22613	0.0379494	Mulching/DeepPlowing_G_2A
Sutterellaceae_bacterium	1.22562	0.00123406	Mulching/DeepPlowing_G_2A
Acidobacteria_bacterium_13_2_20CM_2_66_4	-1.22546	0.0106129	Mulching/DeepPlowing_G_2A
Agrococcus_carbonis	1.22505	0.0300267	Mulching/DeepPlowing_G_2A
Pseudomonas_sp._HMWF031	1.22431	0.00363499	Mulching/DeepPlowing_N_2A
Helicobacter_pylori	1.22419	0.00833652	Mulching/DeepPlowing_G_2A
Sphingobacterium_gobiense	1.22412	0.0354177	Mulching/DeepPlowing_G_2A
Kitasatospora_aureofaciens	-1.22332	0.00616675	Mulching/DeepPlowing_G_2A
Gordoniaceae_bacterium_686	1.22327	0.0468914	Mulching/DeepPlowing_G_2A
Aeromicrobium_marinum	1.2228	0.0314685	Mulching/DeepPlowing_N_2A
Streptomyces_sp._UH6	1.22279	0.0308817	Mulching/DeepPlowing_G_2A
Scytonema_sp._RU_4_4	-1.22204	4.11353e-05	Mulching/DeepPlowing_G_2A
Streptomyces_sp._WAC05858	1.22164	0.00350027	Mulching/DeepPlowing_N_2A
Anaerolineae_bacterium_CG_4_9_14_0_8_um_filter_58_9	-1.22113	0.00275607	Mulching/DeepPlowing_G_2A
Acidobacteria_bacterium_RIFCSPLOWO2_02_FULL_60_20	-1.22059	0.00275607	Mulching/DeepPlowing_G_2A
Mycobacterium_gastri	-1.22004	0.00123406	Mulching/DeepPlowing_G_2A
Bradyrhizobium_betae	1.22002	0.0244344	Mulching/DeepPlowing_G_2A
uncultured_Acidobacteria_bacterium	-1.2183	0.00563554	Mulching/DeepPlowing_G_2A
Alcanivorax_sp._S71-1-4	1.2177	0.0337003	Mulching/DeepPlowing_G_2A
Rhodomicrobium_lacus	-1.21749	0.000493624	Mulching/DeepPlowing_N_2A
Sphingosinicella_sp._CPCC_101087	-1.21699	0.0106129	Mulching/DeepPlowing_G_2A
Massilia_alkalitolerans	1.21692	0.0141917	Mulching/DeepPlowing_G_2A
Bradyrhizobium_sp._83012	1.21653	0.0314685	Mulching/DeepPlowing_G_2A
Streptomyces_sp._RTd22	1.2162	0.0271959	Mulching/DeepPlowing_N_2A
Streptomyces_sp._Wb2n-11	1.21572	0.0421538	Mulching/DeepPlowing_N_2A
Chitinophaga_costaii	1.21528	0.0468311	Mulching/DeepPlowing_G_2A
Streptococcus_suis	1.21435	0.0354177	Mulching/DeepPlowing_N_2A
Streptomyces_sp._SLBN-115	-1.21412	0.00803887	Mulching/DeepPlowing_G_2A
Variovorax_sp._HH01	1.21365	0.0118053	Mulching/DeepPlowing_N_2A
Streptomyces_harbinensis	-1.21322	0.00147011	Mulching/DeepPlowing_G_2A
Massilia_mucilaginosa	1.21167	0.0244344	Mulching/DeepPlowing_G_2A
Pseudomonas_sp._MB-090624	1.21152	0.0456763	Mulching/DeepPlowing_G_2A
Salegentibacter_sp._24	1.21146	0.00222813	Mulching/DeepPlowing_G_2A
Pseudomonas_kunmingensis	1.21114	0.0141917	Mulching/DeepPlowing_N_2A
Rhodococcus_erythropolis	1.21076	0.0421538	Mulching/DeepPlowing_G_2A
Acidobacteria_bacterium_13_2_20CM_2_57_12	-1.21069	0.00123406	Mulching/DeepPlowing_G_2A
Trebonia_kvetii	-1.20916	0.000781571	Mulching/DeepPlowing_G_2A
Candidatus_Rokubacteria_bacterium_GWA2_73_35	-1.2091	0.00399013	Mulching/DeepPlowing_G_2A
Acidobacteria_bacterium_RIFCSPLOWO2_12_FULL_65_11	-1.20869	0.00777458	Mulching/DeepPlowing_G_2A
Streptomyces_phage_Wentworth	1.20842	0.0304245	Mulching/DeepPlowing_G_2A
Rarobacter_faecitabidus	1.20812	0.0159897	Mulching/DeepPlowing_G_2A
Marinilabiliales_bacterium	1.20737	0.0399835	Mulching/DeepPlowing_G_2A
Parcubacteria_group_bacterium_GW2011_GWC2_42_6	-1.2073	0.00123406	Mulching/DeepPlowing_G_2A
Candidatus_Nitrosotenuis_chungbukensis	-1.20702	0.00399013	Mulching/DeepPlowing_G_2A
Granulicella_pectinivorans	-1.20698	0.000781571	Mulching/DeepPlowing_G_2A
Alphaproteobacteria_bacterium_MarineAlpha4_Bin1	-1.20651	0.00185109	Mulching/DeepPlowing_N_2A
Rhodobacteraceae_bacterium_CH30	1.20651	0.0300267	Mulching/DeepPlowing_G_2A
Candidatus_Sungbacteria_bacterium_RIFCSPLOWO2_01_FULL_47_10	1.2064	0.0117204	Mulching/DeepPlowing_G_2A
Kitasatospora_azatica	-1.20597	0.00803887	Mulching/DeepPlowing_G_2A
Nocardia_fusca	1.20573	0.0314685	Mulching/DeepPlowing_N_2A
Mesorhizobium_sp._M1D.F.Ca.ET.043.01.1.1	-1.2052	0.00144524	Mulching/DeepPlowing_G_2A
Ktedonobacter_racemifer	-1.20513	0.00123406	Mulching/DeepPlowing_G_2A
Brevundimonas_phage_vB_BsubS-Delta	1.20475	0.00664093	Mulching/DeepPlowing_N_2A
Alcanivorax_profundi	1.20474	0.036411	Mulching/DeepPlowing_G_2A
Ophiocordyceps_camponoti-rufipedis	1.20419	0.00967768	Mulching/DeepPlowing_G_2A
Candidatus_Yonathbacteria_bacterium_CG_4_10_14_3_um_filter_43_12	1.20359	0.0053165	Mulching/DeepPlowing_G_2A
Ardenticatena_maritima	-1.20346	0.000493624	Mulching/DeepPlowing_G_2A
Desulfocapsa_sp.	-1.20325	0.00123406	Mulching/DeepPlowing_G_2A
bacterium_(Candidatus_Howlettbacteria)_CG_4_9_14_3_um_filter_37_10	1.20309	0.0208858	Mulching/DeepPlowing_G_2A
uncultured_soil_bacterium	-1.20298	0.00777458	Mulching/DeepPlowing_G_2A
Edaphobacter_sp._12200R-103	-1.20273	0.00469675	Mulching/DeepPlowing_G_2A
Burkholderia_stabilis	1.20175	0.0187577	Mulching/DeepPlowing_G_2A
Methylobacterium_sp._AMS5	1.20062	0.0369884	Mulching/DeepPlowing_G_2A
Pseudoxanthomonas_sp.	1.20032	0.0244344	Mulching/DeepPlowing_G_2A
Chryseobacterium_sp._H6466	1.20027	0.0257014	Mulching/DeepPlowing_G_2A
Chloroflexi_bacterium_RBG_16_69_14	-1.20024	0.00563554	Mulching/DeepPlowing_G_2A
Nostoc_sp._TCL26-01	-1.19931	0.000164541	Mulching/DeepPlowing_G_2A
Chromohalobacter_salexigens	1.19878	0.0314685	Mulching/DeepPlowing_N_2A
Nocardioides_psychrotolerans	1.19829	0.0244344	Mulching/DeepPlowing_N_2A
beta_proteobacterium_CB	1.19827	0.037878	Mulching/DeepPlowing_G_2A
Zetaproteobacteria_bacterium_CG_4_9_14_3_um_filter_49_83	1.19775	0.0108604	Mulching/DeepPlowing_G_2A
bacterium_HR28	-1.19738	0.00275607	Mulching/DeepPlowing_G_2A
Bacteroidetes_bacterium_HGW-Bacteroidetes-15	1.19645	0.00268206	Mulching/DeepPlowing_G_2A
Calocera_viscosa	1.19584	0.0183534	Mulching/DeepPlowing_G_2A
Gemmatimonadetes_bacterium_13_1_40CM_2_70_7	-1.1955	0.0106129	Mulching/DeepPlowing_G_2A
Omnitrophica_WOR_2_bacterium_RIFCSPHIGHO2_02_FULL_67_20	-1.19549	0.00123406	Mulching/DeepPlowing_G_2A
Streptomyces_sp._BK308	1.19542	0.0337003	Mulching/DeepPlowing_N_2A
Altererythrobacter_sp._BPTF-M16	1.1952	0.0106129	Mulching/DeepPlowing_G_2A
Deltaproteobacteria_bacterium_GWD2_55_8	-1.195	0.00198698	Mulching/DeepPlowing_G_2A
Streptomyces_sp._NRRL_B-3229	-1.19484	0.00355146	Mulching/DeepPlowing_G_2A
Bacteroides_reticulotermitis	1.19465	0.0338606	Mulching/DeepPlowing_G_2A
Verrucomicrobia_bacterium_RIFCSPLOWO2_12_FULL_64_8	-1.19406	0.00399013	Mulching/DeepPlowing_G_2A
Acidobacteria_bacterium	-1.19321	0.00563554	Mulching/DeepPlowing_G_2A
Nocardioides_sp._ZJ1313	1.19294	0.00563554	Mulching/DeepPlowing_N_2A
Richelia_sp._CSU_2_1	-1.19292	0.00563554	Mulching/DeepPlowing_N_2A
Pseudomonas_sp._B28(2017)	-1.19201	0.0026661	Mulching/DeepPlowing_G_2A
Xylanimonas_cellulosilytica	1.19187	0.0187577	Mulching/DeepPlowing_N_2A
Rhizobiales_bacterium_12-68-15	1.19104	0.0296561	Mulching/DeepPlowing_G_2A
Candidatus_Methylomirabilis_limnetica	-1.19062	0.00185109	Mulching/DeepPlowing_G_2A
Geopsychrobacter_electrodiphilus	1.19057	0.00399013	Mulching/DeepPlowing_G_2A
Pyricularia_oryzae	1.19045	0.0399835	Mulching/DeepPlowing_N_2A
Aeromicrobium_sp._Root495	1.19043	0.0399835	Mulching/DeepPlowing_N_2A
Corallincola_luteus	1.19033	0.0337003	Mulching/DeepPlowing_G_2A
Chitinophaga_terrae_Kim_and_Jung_2007	1.18974	0.0399835	Mulching/DeepPlowing_G_2A
Novosphingobium_naphthalenivorans	1.18974	0.0187577	Mulching/DeepPlowing_G_2A
Cohnella_sp._OV330	1.18944	0.0120418	Mulching/DeepPlowing_G_2A
Actinomadura_parvosata	1.18911	0.0244344	Mulching/DeepPlowing_G_2A
Candidatus_Sulfopaludibacter_sp._SbA6	-1.18778	0.00123406	Mulching/DeepPlowing_G_2A
Candidatus_Saccharibacteria_bacterium_QS_5_54_17	1.18719	0.0216164	Mulching/DeepPlowing_N_2A
Parcubacteria_group_bacterium_Gr01-1014_107	1.18703	0.0235898	Mulching/DeepPlowing_G_2A
Pseudomonas_saudiphocaensis	1.18687	0.0345474	Mulching/DeepPlowing_G_2A
Seinonella_peptonophila	1.18677	0.00563554	Mulching/DeepPlowing_G_2A
Salinicola_halophilus	1.1866	0.00480135	Mulching/DeepPlowing_G_2A
Actinobacteria_bacterium_RBG_16_67_15	-1.18648	0.00275607	Mulching/DeepPlowing_G_2A
Kangiella_sp.	1.18595	0.00399013	Mulching/DeepPlowing_G_2A
Streptomyces_lasalocidi	1.18574	0.0418353	Mulching/DeepPlowing_N_2A
Paenibacillus_sp._MEC069	1.1846	0.0214137	Mulching/DeepPlowing_G_2A
Fluviicola_taffensis	1.18459	0.0399835	Mulching/DeepPlowing_G_2A
Acidobacteria_bacterium_RIFCSPLOWO2_02_FULL_61_28	-1.18457	0.000781571	Mulching/DeepPlowing_G_2A
bacterium_HR39	-1.1841	0.0399835	Mulching/DeepPlowing_N_2A
Caldilineaceae_bacterium	-1.1836	0.0314685	Mulching/DeepPlowing_N_2A
Flavobacterium_sp._BFFFF1	1.18319	0.0399835	Mulching/DeepPlowing_N_2A
Petrimonas_sp._IBARAKI	1.18246	0.00399013	Mulching/DeepPlowing_N_2A
Aureobasidium_pullulans	1.18227	0.0300267	Mulching/DeepPlowing_G_2A
Gordonia_lacunae	1.18226	0.0067849	Mulching/DeepPlowing_G_2A
Mycobacterium_phage_Onyinye	1.1822	0.0271959	Mulching/DeepPlowing_N_2A
Candidatus_Peribacteria_bacterium_RIFCSPHIGHO2_01_FULL_55_13	1.18163	0.0379494	Mulching/DeepPlowing_G_2A
Westiellopsis_prolifica	-1.18142	0.00185109	Mulching/DeepPlowing_G_2A
Nitrospirae_bacterium_RIFCSPLOWO2_12_FULL_63_8	-1.18081	0.000781571	Mulching/DeepPlowing_G_2A
Parcubacteria_group_bacterium_GW2011_GWA2_40_14	1.18035	0.0338606	Mulching/DeepPlowing_G_2A
Rhodopirellula_sallentina	1.1793	0.0244344	Mulching/DeepPlowing_G_2A
bacterium_M00.F.Ca.ET.155.01.1.1	1.17899	0.0216164	Mulching/DeepPlowing_N_2A
Murinocardiopsis_flavida	-1.17894	0.0106129	Mulching/DeepPlowing_G_2A
Chitinophaga_costaii	1.17875	0.00563554	Mulching/DeepPlowing_N_2A
Terracoccus_sp._273MFTsu3.1	1.17804	0.0106129	Mulching/DeepPlowing_G_2A
Youngiibacter_fragilis	1.17783	0.036411	Mulching/DeepPlowing_G_2A
Gordonia_phage_Untouchable	1.17728	0.0290153	Mulching/DeepPlowing_N_2A
Bacillus_sp._SPL91	-1.17704	0.0244344	Mulching/DeepPlowing_N_2A
Erythrobacter_longus	1.17701	0.0244344	Mulching/DeepPlowing_G_2A
Solirubrobacterales_bacterium_URHD0059	-1.17691	0.00123406	Mulching/DeepPlowing_G_2A
Actinophytocola_algeriensis	1.17684	0.0187577	Mulching/DeepPlowing_N_2A
Burkholderiales_bacterium_RIFCSPLOWO2_02_FULL_66_35	1.17675	0.00429977	Mulching/DeepPlowing_G_2A
Chloroflexi_bacterium_RBG_19FT_COMBO_50_10	-1.17674	0.0399835	Mulching/DeepPlowing_N_2A
Pseudomonas_sp._BMS12	1.17619	0.0314685	Mulching/DeepPlowing_G_2A
Neptunomonas_marina	1.17517	0.045356	Mulching/DeepPlowing_G_2A
Streptomyces_sp._Amel2xB2	1.17428	0.0339769	Mulching/DeepPlowing_N_2A
Deinococcus_metallilatus	-1.17419	0.00123406	Mulching/DeepPlowing_G_2A
Candidatus_Saccharibacteria_bacterium_RIFCSPLOWO2_01_FULL_49_22	1.17409	0.0314685	Mulching/DeepPlowing_N_2A
Terracoccus_sp._273MFTsu3.1	1.17388	0.00563554	Mulching/DeepPlowing_N_2A
uncultured_Thermoleophilia_bacterium	-1.17379	0.00185109	Mulching/DeepPlowing_G_2A
Deltaproteobacteria_bacterium_RBG_16_48_10	-1.17369	0.00123406	Mulching/DeepPlowing_G_2A
Acinetobacter_bereziniae	1.1736	0.0430029	Mulching/DeepPlowing_G_2A
Bacillus_oleivorans	-1.17307	0.00339918	Mulching/DeepPlowing_G_2A
Parabacteroides_goldsteinii	1.17203	0.0290153	Mulching/DeepPlowing_G_2A
Chloroflexi_bacterium_13_1_40CM_4_65_16	-1.17184	0.00803887	Mulching/DeepPlowing_G_2A
Pedobacter_sp._KBW01	1.17176	0.0265857	Mulching/DeepPlowing_G_2A
Streptomyces_sp._ETH9427	1.17161	0.0162905	Mulching/DeepPlowing_G_2A
Auricularia_subglabra	1.17109	0.047584	Mulching/DeepPlowing_G_2A
Sphingobium_sp._32-64-5	1.17102	0.000781571	Mulching/DeepPlowing_G_2A
Phytoactinopolyspora_halotolerans	-1.1706	0.00123406	Mulching/DeepPlowing_G_2A
Pajaroellobacter_abortibovis	1.17021	0.0478485	Mulching/DeepPlowing_G_2A
Cytophagales_bacterium_RKSG123	1.16995	0.00185109	Mulching/DeepPlowing_N_2A
Streptomyces_sp._Tu_2975	1.16935	0.0141917	Mulching/DeepPlowing_N_2A
Diaporthe_helianthi	1.16933	0.0478485	Mulching/DeepPlowing_G_2A
Syntrophobacterales_bacterium_CG03_land_8_20_14_0_80_58_14	-1.16913	0.00563554	Mulching/DeepPlowing_N_2A
Zobellella_denitrificans	1.16913	0.0468311	Mulching/DeepPlowing_G_2A
Plantibacter_sp._M259	1.16886	0.0203451	Mulching/DeepPlowing_G_2A
Halomonas_ilicicola	1.16867	0.0418353	Mulching/DeepPlowing_G_2A
Rubrivivax_sp._SCN_71-131	1.16839	0.0399835	Mulching/DeepPlowing_G_2A
Brevibacillus_nitrificans	-1.16787	0.00803887	Mulching/DeepPlowing_G_2A
Pantoea_stewartii	1.16738	0.0271325	Mulching/DeepPlowing_G_2A
Mucilaginibacter_xinganensis	1.16731	0.0421538	Mulching/DeepPlowing_N_2A
Rosellinia_necatrix	1.16726	0.0379494	Mulching/DeepPlowing_G_2A
Limnochorda_pilosa	-1.16597	0.0399835	Mulching/DeepPlowing_N_2A
Serinicoccus_marinus	1.16578	0.00622372	Mulching/DeepPlowing_G_2A
Flavobacterium_sp._TWA-26	1.16572	0.00530044	Mulching/DeepPlowing_G_2A
Chitinophagales_bacterium	1.16567	0.0314685	Mulching/DeepPlowing_N_2A
Microbacterium_phage_Megan	1.16502	0.00493457	Mulching/DeepPlowing_G_2A
Candidatus_Methylospira_mobilis	1.16482	0.0244344	Mulching/DeepPlowing_G_2A
Methanofollis_liminatans	-1.16442	0.0193625	Mulching/DeepPlowing_N_2A
Nitrospira_sp._CG24E	-1.16433	0.00275607	Mulching/DeepPlowing_G_2A
Candidatus_Protochlamydia_sp._R18	1.1643	0.0379494	Mulching/DeepPlowing_G_2A
Leptospira_meyeri	1.16401	0.0103673	Mulching/DeepPlowing_G_2A
Candidatus_Wildermuthbacteria_bacterium_RIFCSPLOWO2_01_FULL_48_29	1.16351	0.0379494	Mulching/DeepPlowing_G_2A
Diaporthe_helianthi	1.16335	0.036411	Mulching/DeepPlowing_N_2A
Wickerhamiella_sorbophila	1.1622	0.0117204	Mulching/DeepPlowing_G_2A
Chryseobacterium_haifense	1.16138	0.014042	Mulching/DeepPlowing_G_2A
Candidatus_Zambryskibacteria_bacterium_CG_4_9_14_3_um_filter_40_16	1.16119	0.0338606	Mulching/DeepPlowing_G_2A
Deltaproteobacteria_bacterium_RBG_16_49_23	-1.16119	0.00275607	Mulching/DeepPlowing_G_2A
Candidatus_Nitrospira_nitrificans	-1.16089	0.00399013	Mulching/DeepPlowing_G_2A
Klenkia_marina	1.16068	0.0193625	Mulching/DeepPlowing_N_2A
Solirubrobacterales_bacterium_70-9	-1.16051	0.0106129	Mulching/DeepPlowing_G_2A
Nocardia_thailandica	1.16037	0.00185109	Mulching/DeepPlowing_N_2A
Pseudomonas_xiamenensis	1.15997	0.0126049	Mulching/DeepPlowing_G_2A
Erythrobacter_sp._CFH_74456	1.15953	0.0139501	Mulching/DeepPlowing_G_2A
Kocuria_sediminis	-1.15887	0.00254545	Mulching/DeepPlowing_G_2A
Fusarium_langsethiae	1.15865	0.0139501	Mulching/DeepPlowing_G_2A
Nocardia_abscessus	1.15832	0.00189222	Mulching/DeepPlowing_N_2A
Planomicrobium_sp._CPCC_101079	-1.15818	0.00794144	Mulching/DeepPlowing_G_2A
Draconibacterium_orientale	-1.15791	0.00563554	Mulching/DeepPlowing_G_2A
Pseudovibrio_sp._Ad46	1.15782	0.036411	Mulching/DeepPlowing_G_2A
Methanobacterium_sp._MB1	-1.15732	0.0170611	Mulching/DeepPlowing_G_2A
Barrevirus_sp.	1.15693	0.0126049	Mulching/DeepPlowing_G_2A
Firmicutes_bacterium_ADurb.Bin153	1.15691	0.0159315	Mulching/DeepPlowing_G_2A
Aeromicrobium_sp.	1.15684	0.00777458	Mulching/DeepPlowing_N_2A
Siansivirga_zeaxanthinifaciens	1.15658	0.0338606	Mulching/DeepPlowing_G_2A
Streptomyces_adustus	-1.1564	0.00563554	Mulching/DeepPlowing_G_2A
Burkholderia_paludis	1.15578	0.036411	Mulching/DeepPlowing_G_2A
Candidatus_Collierbacteria_bacterium_RIFOXYB1_FULL_49_13	1.15508	0.0229511	Mulching/DeepPlowing_G_2A
Fomitopsis_rosea	1.15409	0.00363499	Mulching/DeepPlowing_G_2A
Megasphaera_elsdenii	1.15401	0.0159315	Mulching/DeepPlowing_N_2A
Streptomyces_sparsogenes	1.15364	0.0314685	Mulching/DeepPlowing_N_2A
Mucilaginibacter_sp._OV119	1.1533	0.0187577	Mulching/DeepPlowing_N_2A
Catelliglobosispora_koreensis	1.153	0.0106129	Mulching/DeepPlowing_N_2A
Mycobacterium_phage_JacoRen57	1.15275	0.0120418	Mulching/DeepPlowing_G_2A
Xanthomonas_phage_Xoo-sp2	1.1527	0.0229511	Mulching/DeepPlowing_N_2A
Nocardioides_sp._X2025	1.15254	0.00777458	Mulching/DeepPlowing_N_2A
Anabaena_sp._YBS01	-1.1524	0.00147011	Mulching/DeepPlowing_G_2A
Microbacterium_sp._4R-513	1.15224	0.0187577	Mulching/DeepPlowing_G_2A
Leucoagaricus_sp._SymC.cos	1.15215	0.0141917	Mulching/DeepPlowing_N_2A
Frankia_alni	1.15197	0.0141917	Mulching/DeepPlowing_N_2A
Caldilineaceae_bacterium	-1.15182	0.000287947	Mulching/DeepPlowing_G_2A
uncultured_Clostridium_sp.	1.15175	0.0399835	Mulching/DeepPlowing_N_2A
Candidatus_Portnoybacteria_bacterium_RIFCSPLOWO2_02_FULL_40_15	1.15173	0.000960753	Mulching/DeepPlowing_G_2A
Gelidibacter_algens	1.15138	0.00774841	Mulching/DeepPlowing_G_2A
Sphingorhabdus_sp.	1.15135	0.0106129	Mulching/DeepPlowing_G_2A
Acidobacteria_bacterium_37-71-11	-1.15058	0.000493624	Mulching/DeepPlowing_G_2A
Streptomyces_sp._3212.4	-1.15025	0.00803887	Mulching/DeepPlowing_G_2A
Streptomyces_phage_Bmoc	1.15005	0.00774841	Mulching/DeepPlowing_N_2A
Streptomyces_sp._GMR22	-1.14975	0.00355146	Mulching/DeepPlowing_G_2A
Sphingobium_hydrophobicum	1.14966	0.0385787	Mulching/DeepPlowing_G_2A
Arthrobacter_sp._SF27	-1.14934	0.0104046	Mulching/DeepPlowing_G_2A
Ascoidea_rubescens	1.1484	0.0338606	Mulching/DeepPlowing_G_2A
Paraburkholderia_phenoliruptrix	1.14804	0.0106129	Mulching/DeepPlowing_G_2A
Marinobacter_vinifirmus	1.14784	0.0244344	Mulching/DeepPlowing_N_2A
Streptomyces_vietnamensis	1.14778	0.0108604	Mulching/DeepPlowing_N_2A
Candidatus_Rokubacteria_bacterium_13_1_20CM_70_15	-1.14775	0.0399835	Mulching/DeepPlowing_N_2A
Grifola_frondosa	1.1477	0.000164541	Mulching/DeepPlowing_N_2A
Deinococcus_metallilatus	-1.14728	0.00123406	Mulching/DeepPlowing_N_2A
Georgenia_satyanarayanai	1.14679	0.00469675	Mulching/DeepPlowing_N_2A
Candidatus_Rokubacteria_bacterium_13_1_40CM_2_68_8	-1.14671	0.0187577	Mulching/DeepPlowing_N_2A
Comamonas_sp._E6	1.14665	0.00563554	Mulching/DeepPlowing_N_2A
Micromonospora_sp._AP08	-1.14642	0.000287947	Mulching/DeepPlowing_G_2A
Bacillus_sp._SPL91	-1.14608	0.00616675	Mulching/DeepPlowing_G_2A
Gammaproteobacteria_bacterium_GWE2_37_16	-1.14607	0.0187577	Mulching/DeepPlowing_G_2A
uncultured_actinobacterium_Rifle_16ft_4_minimus_15811	-1.14503	0.00185109	Mulching/DeepPlowing_G_2A
Nocardioides_sp._CF167	1.145	0.0106129	Mulching/DeepPlowing_N_2A
Pimelobacter_sp.	1.1445	0.0399835	Mulching/DeepPlowing_N_2A
Candidatus_Saccharibacteria_bacterium_RIFCSPHIGHO2_12_FULL_47_16	1.14421	0.0496449	Mulching/DeepPlowing_N_2A
[truncated: 529 more rows]

## Sheet: species_M_D_CM
Species	log2FoldChange	pValue	Group
Chlamydiae_bacterium_CG10_big_fil_rev_8_21_14_0_10_42_34	-6.83251	0.00275607	Mulching/DeepPlowing_G_CM
Cyanobacteria_bacterium_PR.023	-6.53375	0.00563554	Mulching/DeepPlowing_G_CM
Alteromonas_sp._07-89-2	-6.35695	0.0271325	Mulching/DeepPlowing_N_CM
Parcubacteria_group_bacterium_ADurb.Bin216	-5.98943	0.0133838	Mulching/DeepPlowing_G_CM
Desulfurellales_bacterium	-5.96162	0.0187577	Mulching/DeepPlowing_G_CM
Desulfurellales_bacterium	-5.76764	0.00185109	Mulching/DeepPlowing_N_CM
Candidatus_Uhrbacteria_bacterium_GW2011_GWD2_52_7	-5.6777	0.0401464	Mulching/DeepPlowing_G_CM
Parcubacteria_group_bacterium_ADurb.Bin216	-5.57418	0.0269581	Mulching/DeepPlowing_N_CM
bacterium_ADurb.Bin425	-5.50267	0.0106129	Mulching/DeepPlowing_G_CM
Cyanobacteria_bacterium_DS2.008	-5.43473	0.01689	Mulching/DeepPlowing_G_CM
Candidatus_Yanofskybacteria_bacterium_GW2011_GWE1_40_10	-5.42313	0.0227205	Mulching/DeepPlowing_G_CM
Marinobacter_guineae	-5.32244	0.0399835	Mulching/DeepPlowing_G_CM
Candidatus_Gottesmanbacteria_bacterium_GW2011_GWB1_49_7	-5.2557	0.0369884	Mulching/DeepPlowing_G_CM
Candidatus_Fonsibacter_lacus	-5.20816	0.0203451	Mulching/DeepPlowing_N_CM
Pirellula_sp._SH-Sr6A	-5.14842	0.0216164	Mulching/DeepPlowing_G_CM
Pseudomonas_sp._HMWF031	-5.03507	0.000762979	Mulching/DeepPlowing_N_CM
Polynucleobacter_asymbioticus	-5.01038	0.0159315	Mulching/DeepPlowing_G_CM
Christensenella_sp._Marseille-P3954	-4.79422	0.0338606	Mulching/DeepPlowing_G_CM
Myoviridae_sp.	-4.78047	0.0106129	Mulching/DeepPlowing_N_CM
Lentimicrobium_sp.	-4.775	0.0314685	Mulching/DeepPlowing_G_CM
Candidatus_Pelagibacter_sp._TMED64	-4.67225	0.0338606	Mulching/DeepPlowing_G_CM
Marivivens_sp.	-4.6226	0.0322364	Mulching/DeepPlowing_G_CM
uncultured_Caudovirales_phage	-4.61256	0.0187577	Mulching/DeepPlowing_N_CM
Prokaryotic_dsDNA_virus_sp.	-4.58536	0.00563554	Mulching/DeepPlowing_N_CM
Phaeobacter_inhibens	-4.49633	0.0180195	Mulching/DeepPlowing_G_CM
EBPR_podovirus_3	-4.37387	0.0338606	Mulching/DeepPlowing_G_CM
Armatimonadetes_bacterium_CG_4_8_14_3_um_filter_58_9	-4.36654	0.0244344	Mulching/DeepPlowing_N_CM
bacterium_ADurb.Bin212	-4.30893	0.0159897	Mulching/DeepPlowing_G_CM
Enterococcus_faecium	-4.23479	0.0132277	Mulching/DeepPlowing_N_CM
Cyanobacteria_bacterium_J149	-4.23108	0.014177	Mulching/DeepPlowing_G_CM
Candidatus_Gracilibacteria_bacterium_GN02-873	-4.18916	0.0338606	Mulching/DeepPlowing_G_CM
Mollicutes_bacterium	-4.16651	0.0139501	Mulching/DeepPlowing_N_CM
Spirochaetes_bacterium_GWB1_59_5	-4.16033	0.00777458	Mulching/DeepPlowing_N_CM
Thermanaeromonas_toyohensis	-4.13542	0.027555	Mulching/DeepPlowing_G_CM
Mollicutes_bacterium	-4.09032	0.0456763	Mulching/DeepPlowing_G_CM
Candidatus_Dependentiae_bacterium	-4.04197	0.00777458	Mulching/DeepPlowing_N_CM
Cyanobacteria_bacterium_DS3.002	-4.0247	0.0314685	Mulching/DeepPlowing_G_CM
Chloroflexi_bacterium_ADurb.Bin180	-4.0145	0.0141917	Mulching/DeepPlowing_G_CM
Maribacter_sp.	-3.9879	0.0399835	Mulching/DeepPlowing_N_CM
Candidatus_Daviesbacteria_bacterium_RIFCSPHIGHO2_12_FULL_37_16	-3.95856	0.0314685	Mulching/DeepPlowing_G_CM
Bacillus_mobilis	-3.94887	0.0103673	Mulching/DeepPlowing_G_CM
Kushneria_konosiri	-3.92173	0.000960753	Mulching/DeepPlowing_N_CM
Candidatus_Atribacteria_bacterium_ADurb.Bin276	-3.89146	0.0338606	Mulching/DeepPlowing_G_CM
Massilia_sp._GEM5	3.88089	0.0314685	Mulching/DeepPlowing_N_CM
Candidatus_Moranbacteria_bacterium_CG_4_9_14_3_um_filter_45_14	-3.87942	0.0291715	Mulching/DeepPlowing_N_CM
candidate_division_SR1_bacterium	-3.87911	0.0227205	Mulching/DeepPlowing_G_CM
Candidatus_Taylorbacteria_bacterium_RIFCSPLOWO2_12_FULL_44_9	-3.87902	0.0214137	Mulching/DeepPlowing_N_CM
Candidatus_Doudnabacteria_bacterium	-3.86985	0.045811	Mulching/DeepPlowing_G_CM
Paraburkholderia_sp._JPY418	-3.86353	0.047584	Mulching/DeepPlowing_G_CM
Halomonas_meridiana	-3.83768	0.0314685	Mulching/DeepPlowing_G_CM
Candidatus_Nomurabacteria_bacterium_RIFCSPLOWO2_01_FULL_33_17	-3.82232	0.0018486	Mulching/DeepPlowing_G_CM
Siphoviridae_sp._ctdEk19	-3.7891	0.00123406	Mulching/DeepPlowing_N_CM
Aequorivita_sp.	-3.78837	0.0399835	Mulching/DeepPlowing_G_CM
Massilia_aurea	3.78669	0.0187577	Mulching/DeepPlowing_N_CM
Candidatus_Moranbacteria_bacterium_CG_4_9_14_3_um_filter_45_14	-3.78467	0.0338606	Mulching/DeepPlowing_G_CM
Candidatus_Azambacteria_bacterium_GW2011_GWB1_46_27	-3.78292	0.0379494	Mulching/DeepPlowing_G_CM
Achromobacter_sp._2789STDY5608633	-3.75894	0.00139633	Mulching/DeepPlowing_N_CM
Candidatus_Dojkabacteria_bacterium	-3.75475	0.0314685	Mulching/DeepPlowing_N_CM
Actinoplanes_phage_phiAsp2	-3.72209	0.0331491	Mulching/DeepPlowing_N_CM
Ralstonia_sp.	-3.70839	0.0314685	Mulching/DeepPlowing_G_CM
Candidatus_Moranbacteria_bacterium_RIFCSPHIGHO2_01_FULL_55_24	-3.6823	0.0235696	Mulching/DeepPlowing_G_CM
Alteromonas_sp._KUL17	-3.62817	0.0139501	Mulching/DeepPlowing_N_CM
Lucifera_butyrica	-3.62753	0.0371401	Mulching/DeepPlowing_G_CM
Parcubacteria_group_bacterium_GW2011_GWB1_56_8	-3.61987	0.0314685	Mulching/DeepPlowing_N_CM
Candidatus_Moranbacteria_bacterium_RIFCSPHIGHO2_01_FULL_54_31	-3.57081	0.0165499	Mulching/DeepPlowing_G_CM
Candidatus_Thalassarchaeum_sp.	-3.53805	0.0208858	Mulching/DeepPlowing_G_CM
Xanthomarina_gelatinilytica	-3.53772	0.000781571	Mulching/DeepPlowing_N_CM
Candidatus_Thalassarchaeum_sp.	-3.49356	0.0108604	Mulching/DeepPlowing_N_CM
Candidatus_Zambryskibacteria_bacterium_RIFOXYD1_FULL_39_35	-3.47744	0.00833652	Mulching/DeepPlowing_G_CM
Chlamydiae_bacterium_RIFCSPHIGHO2_12_FULL_49_9	-3.46123	0.0418353	Mulching/DeepPlowing_G_CM
Podoviridae_sp._ctQNx1	-3.44117	0.0129436	Mulching/DeepPlowing_N_CM
Aspergillus_novofumigatus	3.43726	0.0106129	Mulching/DeepPlowing_N_CM
Parcubacteria_group_bacterium_GW2011_GWB1_56_8	-3.42138	0.0244344	Mulching/DeepPlowing_G_CM
Chaetomium_thermophilum	3.40987	0.0399835	Mulching/DeepPlowing_N_CM
Achromatium_sp._WMS3	-3.38282	0.0314685	Mulching/DeepPlowing_N_CM
Candidatus_Doudnabacteria_bacterium_CG10_big_fil_rev_8_21_14_0_10_42_18	-3.37242	0.00299679	Mulching/DeepPlowing_G_CM
Microgenomates_group_bacterium_GW2011_GWA2_46_16	-3.36099	0.0412001	Mulching/DeepPlowing_N_CM
Candidatus_Moranbacteria_bacterium_GW2011_GWF1_34_10	-3.34755	0.0053165	Mulching/DeepPlowing_N_CM
Candidatus_Kaiserbacteria_bacterium_CG10_big_fil_rev_8_21_14_0_10_44_10	-3.33657	0.0269581	Mulching/DeepPlowing_N_CM
Undibacterium_sp._CY18W	-3.33206	0.0399835	Mulching/DeepPlowing_N_CM
Deltaproteobacteria_bacterium_ADurb.Bin135	-3.33195	0.0314685	Mulching/DeepPlowing_G_CM
Comamonas_sp._JUb58	-3.3314	0.00563554	Mulching/DeepPlowing_N_CM
Parcubacteria_group_bacterium_ADurb.Bin192	-3.32451	0.0322364	Mulching/DeepPlowing_G_CM
uncultured_virus	-3.32048	0.0244344	Mulching/DeepPlowing_N_CM
Pseudoalteromonas_sp.	-3.28467	0.0187577	Mulching/DeepPlowing_G_CM
Colletotrichum_incanum	3.28106	0.0339769	Mulching/DeepPlowing_N_CM
Candidatus_Promineofilum_breve	-3.2454	0.00563554	Mulching/DeepPlowing_G_CM
Candidatus_Roizmanbacteria_bacterium_RIFCSPLOWO2_12_FULL_40_12	-3.24498	0.0187577	Mulching/DeepPlowing_G_CM
candidate_division_WWE3_bacterium_CG_4_10_14_0_2_um_filter_41_14	-3.20599	0.0300267	Mulching/DeepPlowing_G_CM
Rathayibacter_sp._AY1C1	-3.18497	0.0496449	Mulching/DeepPlowing_N_CM
candidate_division_TM6_bacterium_GW2011_GWF2_30_66	-3.17721	0.0244344	Mulching/DeepPlowing_N_CM
Aspergillus_awamori	3.17652	0.00608743	Mulching/DeepPlowing_N_CM
Candidatus_Wolfebacteria_bacterium	-3.17221	0.0399835	Mulching/DeepPlowing_G_CM
Okeania_sp._SIO2H7	-3.14934	0.0026661	Mulching/DeepPlowing_N_CM
Candidatus_Daviesbacteria_bacterium_GW2011_GWA1_36_8	-3.13839	0.0139501	Mulching/DeepPlowing_G_CM
Candidatus_Accumulibacter_sp._SK-01	-3.12391	0.0244344	Mulching/DeepPlowing_N_CM
Methylobacterium_sp._ap11	-3.11213	0.0244344	Mulching/DeepPlowing_G_CM
Treponema_sp._GWB1_62_6	-3.08341	0.0053165	Mulching/DeepPlowing_N_CM
Pseudomonas_sp._JL972	-3.07633	0.0118053	Mulching/DeepPlowing_N_CM
Candidatus_Roizmanbacteria_bacterium_GW2011_GWA2_37_7	-3.07293	0.0108604	Mulching/DeepPlowing_G_CM
Aphanizomenon_flos-aquae	-3.07118	0.0165499	Mulching/DeepPlowing_G_CM
Ralstonia_phage_RP13	-3.06969	0.00185132	Mulching/DeepPlowing_N_CM
Siphoviridae_sp._ctdEk19	-3.05247	0.0421538	Mulching/DeepPlowing_G_CM
Erysipelotrichia_bacterium	-3.04845	0.0399835	Mulching/DeepPlowing_G_CM
Alteromonas_australica	-3.02049	0.00743216	Mulching/DeepPlowing_N_CM
Macromonas_bipunctata	-3.0157	0.0314685	Mulching/DeepPlowing_N_CM
Arthrobacter_sp._ZGTC131	3.01273	0.0399835	Mulching/DeepPlowing_N_CM
Riemerella_anatipestifer	-3.01199	0.00053679	Mulching/DeepPlowing_N_CM
Leptolyngbyaceae_cyanobacterium_RM2_2_4	-2.97624	0.0141917	Mulching/DeepPlowing_N_CM
Cryomorphaceae_bacterium	-2.9513	0.0187577	Mulching/DeepPlowing_G_CM
Powellomyces_hirtus	-2.95015	0.0171513	Mulching/DeepPlowing_N_CM
Chloroflexi_bacterium_RBG_13_53_26	-2.94224	0.00189222	Mulching/DeepPlowing_N_CM
Bordetella_avium	-2.92471	0.0269581	Mulching/DeepPlowing_G_CM
Janthinobacterium_sp._RA13	-2.91395	0.0308817	Mulching/DeepPlowing_N_CM
Chlamydiae_bacterium_RIFCSPHIGHO2_12_FULL_49_9	-2.90809	0.0269581	Mulching/DeepPlowing_N_CM
Epsilonproteobacteria_bacterium	-2.90265	0.0314685	Mulching/DeepPlowing_G_CM
Hymenobacter_sp._P5342	-2.8914	0.0187577	Mulching/DeepPlowing_G_CM
Phormidium_sp._SL48-SHIP	-2.8727	0.0371401	Mulching/DeepPlowing_N_CM
Paenibacillus_sp._EKM211P	-2.87211	0.0108628	Mulching/DeepPlowing_N_CM
Paludibacter_sp._221	-2.85493	0.0354177	Mulching/DeepPlowing_G_CM
Candidatus_Yonathbacteria_bacterium	-2.84683	0.0299049	Mulching/DeepPlowing_G_CM
Promicromonospora_sp._SLBN-65	2.83928	0.0314685	Mulching/DeepPlowing_N_CM
Parcubacteria_group_bacterium_GW2011_GWF1_40_6	-2.83659	0.0371401	Mulching/DeepPlowing_G_CM
Candidatus_Nomurabacteria_bacterium_RIFCSPLOWO2_01_FULL_33_24	-2.82743	0.00299679	Mulching/DeepPlowing_G_CM
Bacteroidetes_bacterium_ADurb.Bin217	-2.82618	0.0385787	Mulching/DeepPlowing_G_CM
Flavobacterium_phage_vB_FspS_tooticki9-1	-2.82466	0.0139501	Mulching/DeepPlowing_G_CM
Flavobacteriia_bacterium	-2.81671	0.0399835	Mulching/DeepPlowing_G_CM
Arthrobacter_sp._KBS0703	2.80781	0.0314685	Mulching/DeepPlowing_N_CM
Rhizopus_microsporus	-2.80656	0.047584	Mulching/DeepPlowing_N_CM
Virus_Rctr197k	-2.80425	0.00616675	Mulching/DeepPlowing_N_CM
Pithovirus_LCPAC104	-2.80341	0.0418353	Mulching/DeepPlowing_N_CM
Pseudomonas_moorei	-2.79749	0.01689	Mulching/DeepPlowing_N_CM
Aromatoleum_toluolicum	-2.77903	0.0399835	Mulching/DeepPlowing_N_CM
Bacteroides_ovatus	-2.77727	0.0053165	Mulching/DeepPlowing_G_CM
Candidatus_Propionivibrio_aalborgensis	-2.75416	0.0141917	Mulching/DeepPlowing_G_CM
Paracoccus_limosus	-2.74976	0.0468914	Mulching/DeepPlowing_G_CM
Microgenomates_group_bacterium_ADurb.Bin238	-2.74526	0.0379494	Mulching/DeepPlowing_G_CM
Candidatus_Nomurabacteria_bacterium_CG10_big_fil_rev_8_21_14_0_10_35_16	-2.72006	0.0371401	Mulching/DeepPlowing_N_CM
Delftia_acidovorans	-2.71506	0.0187577	Mulching/DeepPlowing_N_CM
Epibacterium_mobile	-2.715	0.0420777	Mulching/DeepPlowing_G_CM
Bdellovibrio_sp._CG10_big_fil_rev_8_21_14_0_10_47_8	-2.70658	0.0214137	Mulching/DeepPlowing_G_CM
Elusimicrobia_bacterium_RBG_16_66_12	-2.70254	0.0399835	Mulching/DeepPlowing_G_CM
Candidatus_Thorarchaeota_archaeon	-2.69918	0.0187577	Mulching/DeepPlowing_N_CM
Bacillus_subtilis	-2.69369	0.0418353	Mulching/DeepPlowing_N_CM
Chloroflexi_bacterium_ADurb.Bin222	-2.6885	0.0399835	Mulching/DeepPlowing_G_CM
Elizabethkingia_anophelis	-2.65664	0.00777458	Mulching/DeepPlowing_G_CM
Sphingomonadales_bacterium_28-56-43	-2.64128	0.0235898	Mulching/DeepPlowing_N_CM
Mahella_australiensis	-2.62184	0.036411	Mulching/DeepPlowing_G_CM
Thermoanaerosceptrum_fracticalcis	-2.61956	0.00145282	Mulching/DeepPlowing_N_CM
Achromobacter_ruhlandii	-2.59822	0.00563554	Mulching/DeepPlowing_N_CM
Candidatus_Zambryskibacteria_bacterium_RIFCSPLOWO2_01_FULL_35_19	-2.59755	0.014042	Mulching/DeepPlowing_G_CM
Comamonas_sp._Tr-654	-2.58933	0.000960753	Mulching/DeepPlowing_N_CM
Vibrio_sp._2523-88	-2.58647	0.0338606	Mulching/DeepPlowing_N_CM
candidate_division_TM6_bacterium_RIFCSPHIGHO2_12_FULL_32_22	-2.58629	0.00254545	Mulching/DeepPlowing_N_CM
Treponema_endosymbiont_of_Eucomonympha_sp.	-2.58494	0.0139501	Mulching/DeepPlowing_N_CM
Candidatus_Cryosericum_septentrionale	-2.57903	0.0269581	Mulching/DeepPlowing_N_CM
Nitrosomonas_sp._Nm34	-2.57084	0.0187577	Mulching/DeepPlowing_N_CM
Pseudomonas_songnenensis	-2.56222	0.0399835	Mulching/DeepPlowing_N_CM
Bacteroides_ovatus	-2.56124	0.0445654	Mulching/DeepPlowing_N_CM
Flavobacteriales_bacterium_TMED228	-2.55708	0.0053165	Mulching/DeepPlowing_N_CM
Sulfurimonas_sp.	-2.55571	0.014042	Mulching/DeepPlowing_N_CM
Epsilonproteobacteria_bacterium	-2.555	0.0399835	Mulching/DeepPlowing_N_CM
Synergistetes_bacterium_ADurb.BinA166	-2.55343	0.0106129	Mulching/DeepPlowing_N_CM
Naumannella_halotolerans	-2.54317	0.0468914	Mulching/DeepPlowing_G_CM
Chryseobacterium_sp.	-2.53998	0.0399835	Mulching/DeepPlowing_G_CM
Candidatus_Aminicenantes_bacterium_ADurb.Bin508	-2.53378	0.0016442	Mulching/DeepPlowing_N_CM
Saprospirales_bacterium	-2.52761	0.0106129	Mulching/DeepPlowing_G_CM
Bacteroides_cellulosilyticus	-2.52379	0.045356	Mulching/DeepPlowing_N_CM
Massilia_sp._GEM5	2.51383	0.0399835	Mulching/DeepPlowing_G_CM
Chloroflexi_bacterium_GWC2_70_10	2.50213	0.000287947	Mulching/DeepPlowing_N_CM
Planctomycetes_bacterium_Mal48	-2.50142	0.0141917	Mulching/DeepPlowing_G_CM
Colletotrichum_higginsianum	2.49454	0.0193625	Mulching/DeepPlowing_N_CM
Arthrobacter_sp._S39	2.49192	0.0399835	Mulching/DeepPlowing_N_CM
Bacillus_cellulosilyticus	-2.48535	0.0053165	Mulching/DeepPlowing_G_CM
Eutypa_lata	2.48503	0.0100507	Mulching/DeepPlowing_N_CM
Candidatus_Uhrbacteria_bacterium_GW2011_GWF2_40_263	-2.48271	0.0456763	Mulching/DeepPlowing_N_CM
Janthinobacterium_sp._35	-2.46789	0.0331491	Mulching/DeepPlowing_N_CM
Acidithiobacillus_thiooxidans	-2.46611	0.00530044	Mulching/DeepPlowing_G_CM
Arthrobacter_sp._UNC362MFTsu5.1	2.46522	0.00616675	Mulching/DeepPlowing_N_CM
Bacteroidetes_bacterium_ADurb.Bin028	-2.46077	0.0349299	Mulching/DeepPlowing_G_CM
Sphingomonas_sp._Leaf16	-2.45051	0.0244344	Mulching/DeepPlowing_N_CM
Rhodobacteraceae_bacterium_Water-Bin34	-2.44818	0.00241539	Mulching/DeepPlowing_N_CM
Candidatus_Nomurabacteria_bacterium_CG10_big_fil_rev_8_21_14_0_10_35_16	-2.44231	0.0199881	Mulching/DeepPlowing_G_CM
Candidatus_Amesbacteria_bacterium_GW2011_GWB1_48_13	-2.44218	0.0203451	Mulching/DeepPlowing_N_CM
Altibacter_sp.	-2.44184	0.00102283	Mulching/DeepPlowing_N_CM
Bacteroidetes_bacterium_OLB9	-2.42951	0.00399013	Mulching/DeepPlowing_G_CM
Delftia_lacustris	-2.4262	0.0420777	Mulching/DeepPlowing_G_CM
Candidatus_Nomurabacteria_bacterium_RIFOXYD1_FULL_39_12	-2.42488	0.0139501	Mulching/DeepPlowing_G_CM
Staphylococcus_haemolyticus	-2.42158	0.00198159	Mulching/DeepPlowing_N_CM
Bacillus_cellulosilyticus	-2.41445	0.00229507	Mulching/DeepPlowing_N_CM
Kineococcus_sp._T13	-2.41252	0.00777458	Mulching/DeepPlowing_G_CM
Marinobacter_sp._LZ-8	-2.4103	0.0133708	Mulching/DeepPlowing_N_CM
Achromobacter_anxifer	-2.40308	0.0314685	Mulching/DeepPlowing_N_CM
Batrachochytrium_salamandrivorans	-2.39962	0.0244344	Mulching/DeepPlowing_N_CM
Candidatus_Daviesbacteria_bacterium_RIFCSPLOWO2_01_FULL_37_10	-2.38831	0.0418353	Mulching/DeepPlowing_G_CM
Streptomyces_lincolnensis	2.38375	0.0106129	Mulching/DeepPlowing_N_CM
Candidatus_Accumulibacter_sp._SK-02	-2.3706	0.0244344	Mulching/DeepPlowing_N_CM
Elusimicrobium_minutum	-2.36924	0.0338606	Mulching/DeepPlowing_G_CM
Mesorhizobium_sp._L103C120A0	-2.36885	0.0271325	Mulching/DeepPlowing_G_CM
Candidatus_Daviesbacteria_bacterium_GW2011_GWB1_41_5	-2.36758	0.0170611	Mulching/DeepPlowing_G_CM
Candidatus_Nomurabacteria_bacterium_CG_4_10_14_0_2_um_filter_30_12	-2.36612	0.0108628	Mulching/DeepPlowing_N_CM
SR1_bacterium_human_oral_taxon_HOT-345	-2.36546	0.0338606	Mulching/DeepPlowing_G_CM
Bdellovibrionaceae_bacterium	-2.33909	0.00399013	Mulching/DeepPlowing_N_CM
Pusillimonas_ginsengisoli	-2.33653	0.00275607	Mulching/DeepPlowing_N_CM
candidate_division_TM6_bacterium_GW2011_GWF2_32_72	-2.33645	0.015117	Mulching/DeepPlowing_N_CM
Thermotogaceae_bacterium	-2.33019	0.00469675	Mulching/DeepPlowing_N_CM
Spartobacteria_bacterium	-2.32606	0.000287947	Mulching/DeepPlowing_N_CM
Gordonia_phage_Lambo	-2.32081	0.0468311	Mulching/DeepPlowing_N_CM
candidate_division_TM6_bacterium_GW2011_GWF2_33_332	-2.31734	0.00350027	Mulching/DeepPlowing_N_CM
Marinobacter_sp._T13-3	-2.30899	0.0300267	Mulching/DeepPlowing_G_CM
Chloroflexi_bacterium_RIFCSPLOWO2_12_FULL_71_12	2.30446	0.0339769	Mulching/DeepPlowing_N_CM
Arthrobacter_phage_Mimi	2.30065	0.0399835	Mulching/DeepPlowing_G_CM
Candidatus_Kaiserbacteria_bacterium_RIFCSPLOWO2_12_FULL_45_26	-2.29662	0.0337003	Mulching/DeepPlowing_G_CM
Flexibacter_flexilis	-2.29442	0.0132277	Mulching/DeepPlowing_G_CM
Dechloromonas_denitrificans	-2.28455	0.0106129	Mulching/DeepPlowing_G_CM
Trichoderma_arundinaceum	2.28321	0.00608743	Mulching/DeepPlowing_N_CM
Candidatus_Nomurabacteria_bacterium_RIFCSPLOWO2_01_FULL_41_21	-2.28282	0.0104046	Mulching/DeepPlowing_N_CM
Candidatus_Nomurabacteria_bacterium_RIFCSPHIGHO2_01_FULL_38_19	-2.26431	0.00641585	Mulching/DeepPlowing_N_CM
Arcobacter_cibarius	-2.26348	0.0468914	Mulching/DeepPlowing_G_CM
Colletotrichum_musicola	2.26165	0.0180195	Mulching/DeepPlowing_N_CM
Syntrophus_sp._PtaB.Bin075	-2.26151	0.0118053	Mulching/DeepPlowing_N_CM
Chloroflexi_bacterium_RIFCSPLOWO2_02_FULL_71_16	2.25851	0.0314685	Mulching/DeepPlowing_N_CM
Sphingobacterium_mizutaii	-2.25273	0.0354177	Mulching/DeepPlowing_G_CM
Pusillimonas_sp._EA3	-2.25179	0.0418353	Mulching/DeepPlowing_N_CM
Moorella_sp._E308F	-2.24885	0.00400046	Mulching/DeepPlowing_G_CM
Betaproteobacteria_bacterium_HGW-Betaproteobacteria-4	-2.24848	0.0141917	Mulching/DeepPlowing_N_CM
Alteromonas_sp._TMED35	-2.2473	0.0456763	Mulching/DeepPlowing_N_CM
candidate_division_WWE3_bacterium_RBG_16_37_10	-2.24181	0.0376219	Mulching/DeepPlowing_G_CM
Mesorhizobium_sp._M4B.F.Ca.ET.203.01.1.1	-2.24089	0.0159315	Mulching/DeepPlowing_N_CM
Blastopirellula_retiformator	-2.23671	0.0244344	Mulching/DeepPlowing_G_CM
Paenibacillus_macerans	-2.22976	0.0170611	Mulching/DeepPlowing_G_CM
Fusarium_euwallaceae	2.22799	0.045811	Mulching/DeepPlowing_N_CM
Burkholderia_multivorans	-2.22754	0.0187577	Mulching/DeepPlowing_G_CM
Pusillimonas_sp._EA3	-2.22437	0.0124763	Mulching/DeepPlowing_G_CM
Candidatus_Heimdallarchaeota_archaeon	-2.22287	0.0170611	Mulching/DeepPlowing_N_CM
Ophiocordyceps_sinensis	2.22195	0.00777458	Mulching/DeepPlowing_N_CM
candidate_division_SR1_bacterium_RAAC1_SR1_1	-2.22135	0.0338606	Mulching/DeepPlowing_N_CM
Candidatus_Collierbacteria_bacterium	-2.22081	0.00967768	Mulching/DeepPlowing_G_CM
Okeania_sp._SIO1I7	-2.21711	0.0244344	Mulching/DeepPlowing_N_CM
Pseudarthrobacter_sulfonivorans	2.20608	0.0399835	Mulching/DeepPlowing_N_CM
Escherichia_coli	-2.20583	0.0187577	Mulching/DeepPlowing_G_CM
blood_disease_bacterium_R229	-2.19977	0.0399835	Mulching/DeepPlowing_N_CM
Bacillus_circulans	-2.18845	0.0338606	Mulching/DeepPlowing_G_CM
Nitratifractor_salsuginis	-2.18844	0.045811	Mulching/DeepPlowing_G_CM
Candidatus_Micrarchaeota_archaeon_CG08_land_8_20_14_0_20_59_11	-2.18612	0.0468914	Mulching/DeepPlowing_G_CM
Synechocystis_sp._CACIAM_05	-2.18606	0.0007726	Mulching/DeepPlowing_N_CM
Gammaproteobacteria_bacterium_TMED36	-2.18454	0.0354177	Mulching/DeepPlowing_G_CM
Streptomyces_cacaoi	2.18206	0.00123406	Mulching/DeepPlowing_N_CM
Diaphorobacter_polyhydroxybutyrativorans	-2.18078	0.0399835	Mulching/DeepPlowing_N_CM
Rhizobium_sp._MHM7A	-2.17609	0.0139501	Mulching/DeepPlowing_G_CM
Acinetobacter_junii	-2.17607	0.0296561	Mulching/DeepPlowing_G_CM
Microbacterium_sp.	2.17543	0.0244344	Mulching/DeepPlowing_N_CM
Owenweeksia_hongkongensis	-2.16924	0.0171513	Mulching/DeepPlowing_G_CM
Arthrobacter_nitrophenolicus	2.16922	0.0141917	Mulching/DeepPlowing_N_CM
Candidatus_Magasanikbacteria_bacterium	-2.16897	0.0331491	Mulching/DeepPlowing_G_CM
Microbacterium_sp._LAM7116	2.15779	0.0132277	Mulching/DeepPlowing_N_CM
Shinella_fusca	-2.15606	0.0187577	Mulching/DeepPlowing_G_CM
Acidovorax_sp._17-64-282	-2.14919	0.014177	Mulching/DeepPlowing_N_CM
Candidatus_Uhrbacteria_bacterium_RIFOXYC12_FULL_57_11	-2.14777	0.0218189	Mulching/DeepPlowing_G_CM
Candidatus_Nomurabacteria_bacterium_GW2011_GWA2_40_9	-2.14684	0.0290153	Mulching/DeepPlowing_G_CM
Methylorubrum_extorquens	-2.14427	0.0106129	Mulching/DeepPlowing_G_CM
Arthrobacter_sp._4R501	2.14359	0.0141917	Mulching/DeepPlowing_N_CM
Marseillevirus_LCMAC102	-2.14156	0.00567379	Mulching/DeepPlowing_N_CM
Chlamydiae_bacterium_CG10_big_fil_rev_8_21_14_0_10_35_9	-2.14091	0.0257014	Mulching/DeepPlowing_N_CM
Chrysoporthe_cubensis	2.13411	0.0271959	Mulching/DeepPlowing_N_CM
Sulfitobacter_phage_phiGT1	-2.13041	0.0338606	Mulching/DeepPlowing_N_CM
Tissierella_sp.	-2.12998	0.0139501	Mulching/DeepPlowing_N_CM
Trichoderma_reesei	2.12747	0.0236102	Mulching/DeepPlowing_N_CM
Ruminococcus_flavefaciens	-2.12619	0.0210105	Mulching/DeepPlowing_G_CM
Haloactinobacterium_sp._T3246_1	2.12409	0.00399013	Mulching/DeepPlowing_N_CM
blood_disease_bacterium_R229	-2.12201	0.0399835	Mulching/DeepPlowing_G_CM
Bacteroides_reticulotermitis	-2.11663	0.0338606	Mulching/DeepPlowing_G_CM
Epulopiscium_sp.	-2.11305	0.00777458	Mulching/DeepPlowing_N_CM
Pseudomonas_trivialis	-2.11052	0.0371401	Mulching/DeepPlowing_G_CM
Sulfurovum_sp._UBA12169	-2.10928	0.00480135	Mulching/DeepPlowing_N_CM
Escherichia_coli	-2.10909	0.000493624	Mulching/DeepPlowing_N_CM
Moorella_sp._E308F	-2.10452	0.045811	Mulching/DeepPlowing_N_CM
Burkholderia_sp._BE12	-2.10369	0.0338606	Mulching/DeepPlowing_G_CM
Solirubrobacterales_bacterium_70-9	2.10235	0.0244344	Mulching/DeepPlowing_N_CM
Nitrosarchaeum_sp.	-2.09987	0.0399835	Mulching/DeepPlowing_N_CM
Pedobacter_helvus	-2.08687	0.0208912	Mulching/DeepPlowing_N_CM
Ectothiorhodospira_magna	-2.08026	0.0369884	Mulching/DeepPlowing_G_CM
Fusarium_venenatum	2.07842	0.0331491	Mulching/DeepPlowing_N_CM
Gordonia_phage_Gudmit	-2.07657	0.00057874	Mulching/DeepPlowing_N_CM
Candidatus_Micrarchaeota_archaeon_CG08_land_8_20_14_0_20_59_11	-2.07582	0.01689	Mulching/DeepPlowing_N_CM
Actinobacteria_bacterium_RBG_13_55_18	-2.07083	0.0106129	Mulching/DeepPlowing_N_CM
candidate_division_WWE3_bacterium_RIFCSPHIGHO2_02_FULL_38_14	-2.06235	0.0199881	Mulching/DeepPlowing_G_CM
Arthrobacter_sp._Leaf69	2.05799	0.0399835	Mulching/DeepPlowing_G_CM
Sphingomonas_sp._JE1	2.05699	0.045811	Mulching/DeepPlowing_N_CM
Streptomyces_sp._DI166	2.05603	0.0106129	Mulching/DeepPlowing_N_CM
Euhalothece_sp._KZN_001	-2.0507	0.00198159	Mulching/DeepPlowing_N_CM
Bacteroides_reticulotermitis	-2.0495	0.0139501	Mulching/DeepPlowing_N_CM
Naasia_lichenicola	2.0483	0.0141917	Mulching/DeepPlowing_N_CM
Parvibaculum_sp.	-2.04738	0.0314685	Mulching/DeepPlowing_G_CM
Pyricularia_grisea	2.0467	0.0478485	Mulching/DeepPlowing_N_CM
Alphaproteobacteria_bacterium_ADurb.Bin438	-2.04629	0.0338606	Mulching/DeepPlowing_G_CM
Lysobacter_dokdonensis	2.04257	0.0141917	Mulching/DeepPlowing_G_CM
Mesorhizobium_sp._B2-1-2	-2.04095	0.00794144	Mulching/DeepPlowing_N_CM
Arthrinium_arundinis	2.03366	0.0133708	Mulching/DeepPlowing_N_CM
Chryseobacterium_indologenes	-2.02937	0.0418353	Mulching/DeepPlowing_G_CM
Salinibacterium_sp._ZJ70	2.02817	0.0271959	Mulching/DeepPlowing_N_CM
Grosmannia_clavigera	2.02784	0.0418353	Mulching/DeepPlowing_N_CM
Lysobacter_sp._HX-5-24	2.02226	0.0141917	Mulching/DeepPlowing_G_CM
Candidatus_Kaiserbacteria_bacterium_RIFOXYD1_FULL_42_15	-2.02027	0.0322364	Mulching/DeepPlowing_G_CM
Verrucomicrobiae_bacterium	-2.02009	0.0314685	Mulching/DeepPlowing_G_CM
Bacillus_sp._REN51N	-2.0198	0.00345089	Mulching/DeepPlowing_N_CM
Streptomyces_sp._Ncost-T10-10d	2.01899	0.0026255	Mulching/DeepPlowing_N_CM
Candidatus_Peregrinibacteria_bacterium_GW2011_GWA2_47_7	-2.01841	0.0337003	Mulching/DeepPlowing_N_CM
Streptomyces_sp._ADI96-02	2.01832	0.045811	Mulching/DeepPlowing_G_CM
Myxococcus_virus_Mx8	-2.01769	0.0229511	Mulching/DeepPlowing_G_CM
Deltaproteobacteria_bacterium_RIFCSPLOWO2_02_FULL_44_10	-2.01561	0.0371401	Mulching/DeepPlowing_G_CM
Thalassospira_xiamenensis	2.01494	0.0187577	Mulching/DeepPlowing_N_CM
Bacteroidetes_bacterium_41-46	-2.01061	0.0369884	Mulching/DeepPlowing_G_CM
Clostridium_perfringens	-2.00822	0.0399835	Mulching/DeepPlowing_G_CM
Microbacterium_sp._TNHR37B	2.002	0.00275607	Mulching/DeepPlowing_N_CM
Arthrobacter_silvisoli	2.00092	0.00185109	Mulching/DeepPlowing_N_CM
Pseudomonas_umsongensis	1.99994	0.0187577	Mulching/DeepPlowing_N_CM
Aminomonas_paucivorans	-1.99847	0.00350027	Mulching/DeepPlowing_N_CM
Xylaria_multiplex	1.99482	0.0236102	Mulching/DeepPlowing_N_CM
Filimonas_sp.	-1.98494	0.0120418	Mulching/DeepPlowing_G_CM
Arthrobacter_sp._BB-1	1.98472	0.00147011	Mulching/DeepPlowing_N_CM
Haematobacter_massiliensis	-1.97968	0.0399835	Mulching/DeepPlowing_G_CM
Brettanomyces_naardenensis	-1.97244	0.0456763	Mulching/DeepPlowing_N_CM
Arthrobacter_phage_Wilde	1.97184	0.0399835	Mulching/DeepPlowing_G_CM
Streptomyces_virginiae	1.96555	0.00267396	Mulching/DeepPlowing_N_CM
Mesorhizobium_sp._B2-1-2	-1.96329	0.0236102	Mulching/DeepPlowing_G_CM
Clostridium_sporogenes	-1.95262	0.0349299	Mulching/DeepPlowing_G_CM
uncultured_bacterium_lac153	1.94959	0.0141917	Mulching/DeepPlowing_G_CM
Deltaproteobacteria_bacterium_GWA2_45_12	-1.94704	0.0314685	Mulching/DeepPlowing_N_CM
Xanthomonas_phage_Xp15	-1.9447	0.0159315	Mulching/DeepPlowing_G_CM
Rhodobacterales_bacterium_32-67-9	-1.94004	0.0314685	Mulching/DeepPlowing_G_CM
Microbacterium_hydrocarbonoxydans	1.93974	0.0141917	Mulching/DeepPlowing_N_CM
Neocallimastix_californiae	-1.93783	0.0421538	Mulching/DeepPlowing_G_CM
Nocardia_asiatica	1.93717	0.0421538	Mulching/DeepPlowing_N_CM
Chlamydiae_bacterium_CG10_big_fil_rev_8_21_14_0_10_35_9	-1.93186	0.0108604	Mulching/DeepPlowing_G_CM
Gammaproteobacteria_bacterium_TMED36	-1.93031	0.0322364	Mulching/DeepPlowing_N_CM
Lysobacter_sp.	1.92938	0.0141917	Mulching/DeepPlowing_G_CM
Paenibacillaceae_bacterium	-1.92877	0.0106129	Mulching/DeepPlowing_G_CM
Arthrobacter_sp._SRS-W-1-2016	1.92376	0.0216164	Mulching/DeepPlowing_N_CM
Nitrosomonas_sp._HPC101	-1.92088	0.0399835	Mulching/DeepPlowing_N_CM
Thermus_brockianus	-1.9199	0.0159897	Mulching/DeepPlowing_N_CM
Nanoarchaeota_archaeon	-1.91796	0.0399835	Mulching/DeepPlowing_G_CM
Pseudarthrobacter_sp._YJ56	1.91756	0.0106129	Mulching/DeepPlowing_N_CM
Vogesella_perlucida	-1.91617	0.0257014	Mulching/DeepPlowing_G_CM
Planctomycetes_bacterium_Pla86	-1.91488	0.0314685	Mulching/DeepPlowing_G_CM
Ralstonia_pickettii	-1.9116	0.0314685	Mulching/DeepPlowing_N_CM
Streptomyces_spongiae	1.90797	0.0216164	Mulching/DeepPlowing_N_CM
Prochlorococcus_marinus	-1.90659	0.00275607	Mulching/DeepPlowing_N_CM
Acidithiobacillus_thiooxidans	-1.90573	0.0322364	Mulching/DeepPlowing_N_CM
Porphyrobacter_sp._CACIAM_03H1	-1.90563	0.0399835	Mulching/DeepPlowing_N_CM
Cupriavidus_sp._HMR-1	-1.90425	0.0496449	Mulching/DeepPlowing_N_CM
Bdellovibrio_sp._CG_4_9_14_3_um_filter_39_7	-1.90343	0.047584	Mulching/DeepPlowing_G_CM
Candidatus_Lloydbacteria_bacterium_RIFCSPHIGHO2_01_FULL_41_20	-1.89207	0.0345474	Mulching/DeepPlowing_G_CM
Mesorhizobium_sp._Root172	-1.88956	0.0269581	Mulching/DeepPlowing_G_CM
Candidatus_Nomurabacteria_bacterium_RIFCSPHIGHO2_01_FULL_38_19	-1.88885	0.00310921	Mulching/DeepPlowing_G_CM
Citreicella_sp.	-1.88859	0.0420777	Mulching/DeepPlowing_G_CM
Streptomyces_fradiae	1.8859	0.0314685	Mulching/DeepPlowing_N_CM
Mycobacterium_malmoense	-1.88493	0.0106129	Mulching/DeepPlowing_G_CM
Sediminispirochaeta_smaragdinae	-1.88349	0.0290153	Mulching/DeepPlowing_N_CM
Gilvibacter_sp.	-1.88011	0.0314685	Mulching/DeepPlowing_N_CM
Moorea_sp._SIO4E2	-1.87591	0.0214137	Mulching/DeepPlowing_N_CM
Gemmata_sp.	-1.87206	0.0399835	Mulching/DeepPlowing_G_CM
Candidatus_Nomurabacteria_bacterium_RIFCSPLOWO2_01_FULL_40_18	-1.86632	0.00429977	Mulching/DeepPlowing_N_CM
Candidatus_Roizmanbacteria_bacterium_CG_4_10_14_0_2_um_filter_39_13	-1.86454	0.0269581	Mulching/DeepPlowing_G_CM
Waddlia_chondrophila	-1.86396	0.0369884	Mulching/DeepPlowing_G_CM
Microbacterium_oxydans	1.8627	0.00777458	Mulching/DeepPlowing_N_CM
Haloactinobacterium_sp._HY164	1.86061	0.0214137	Mulching/DeepPlowing_N_CM
Labedella_gwakjiensis	1.85977	0.0106129	Mulching/DeepPlowing_N_CM
Candidatus_Gottesmanbacteria_bacterium_GW2011_GWA1_34_13	-1.85888	0.0183534	Mulching/DeepPlowing_G_CM
Tropicimonas_sp._IMCC6043	-1.85521	0.0399835	Mulching/DeepPlowing_G_CM
Arcobacter_butzleri	-1.85463	0.0314685	Mulching/DeepPlowing_N_CM
Bdellovibrio_bacteriovorus	-1.85399	0.0244344	Mulching/DeepPlowing_N_CM
Pedobacter_sp._KBW01	-1.85108	0.0110555	Mulching/DeepPlowing_G_CM
Alteromonas_sp._KS69	-1.85069	0.00825594	Mulching/DeepPlowing_N_CM
Ochrobactrum_anthropi	-1.84899	0.0314685	Mulching/DeepPlowing_G_CM
Paeniglutamicibacter_sp._ANT13_2	1.84714	0.036411	Mulching/DeepPlowing_N_CM
Arthrobacter_sp._Soil762	1.84405	0.0399835	Mulching/DeepPlowing_N_CM
Lysobacter_sp._Root494	1.8439	0.0141917	Mulching/DeepPlowing_G_CM
Chlamydiae_bacterium_RIFCSPLOWO2_02_FULL_45_22	-1.84356	0.0420777	Mulching/DeepPlowing_G_CM
Chloroflexi_bacterium_13_1_40CM_3_70_6	1.84347	0.00803887	Mulching/DeepPlowing_N_CM
Pseudoclavibacter_chungangensis	1.83806	0.00222813	Mulching/DeepPlowing_N_CM
Candidatus_Nomurabacteria_bacterium_RIFCSPHIGHO2_02_FULL_42_19	-1.83722	0.0331491	Mulching/DeepPlowing_N_CM
Blastococcus_sp._CCUG_61487	-1.83715	0.000287947	Mulching/DeepPlowing_G_CM
Mycolicibacter_heraklionensis	-1.83653	0.0141917	Mulching/DeepPlowing_G_CM
uncultured_bacterium_Lac36W	1.83617	0.0244344	Mulching/DeepPlowing_G_CM
Candidatus_Nomurabacteria_bacterium_RIFCSPLOWO2_12_FULL_37_8	-1.83473	0.0257014	Mulching/DeepPlowing_N_CM
Leifsonia_sp._BK543	1.83282	0.0141917	Mulching/DeepPlowing_N_CM
Pseudomethylobacillus_aquaticus	-1.83101	0.0141917	Mulching/DeepPlowing_G_CM
Pseudomonas_aeruginosa	-1.83099	0.0244344	Mulching/DeepPlowing_N_CM
Pseudomonas_bauzanensis	-1.82619	0.0187577	Mulching/DeepPlowing_G_CM
Candidatus_Anoxychlamydiales_bacterium	-1.82438	0.0296561	Mulching/DeepPlowing_G_CM
Acidithiobacillus_caldus	-1.82067	0.00185109	Mulching/DeepPlowing_N_CM
Rhodococcus_enclensis	-1.81668	0.0369884	Mulching/DeepPlowing_N_CM
Sporothrix_schenckii	1.81646	0.0106129	Mulching/DeepPlowing_N_CM
Mycolicibacterium_moriokaense	-1.81484	0.00185109	Mulching/DeepPlowing_G_CM
Xylella_fastidiosa	-1.81387	0.00777458	Mulching/DeepPlowing_N_CM
Arthrobacter_virus_Jasmine	1.81251	0.0314685	Mulching/DeepPlowing_G_CM
Candidatus_Nomurabacteria_bacterium_RIFCSPLOWO2_02_FULL_41_9	-1.81137	0.0183534	Mulching/DeepPlowing_N_CM
Candidatus_Izimaplasma_sp._HR2	-1.80885	0.045811	Mulching/DeepPlowing_N_CM
Parcubacteria_group_bacterium_LiPW_30	-1.80633	0.00966455	Mulching/DeepPlowing_G_CM
Chloroflexi_bacterium_13_1_40CM_67_9	1.80012	0.00355146	Mulching/DeepPlowing_N_CM
Acinetobacter_junii	-1.79702	0.0271959	Mulching/DeepPlowing_N_CM
Microbacterium_ulmi	1.7936	0.0399835	Mulching/DeepPlowing_N_CM
Firmicutes_bacterium_ADurb.Bin153	-1.78877	0.0180195	Mulching/DeepPlowing_N_CM
Cellvibrionales_bacterium	-1.78709	0.00777458	Mulching/DeepPlowing_G_CM
Prochlorothrix_hollandica	-1.78592	0.0339769	Mulching/DeepPlowing_N_CM
Arthrobacter_globiformis	1.78558	0.0244344	Mulching/DeepPlowing_G_CM
Anaerolineae_bacterium_UTCFX5	-1.78491	0.0418353	Mulching/DeepPlowing_G_CM
Pseudomonas_zeshuii	-1.78202	0.0338606	Mulching/DeepPlowing_N_CM
Caldanaerobius_polysaccharolyticus	-1.78081	0.0401464	Mulching/DeepPlowing_N_CM
Hydrocoleum_sp._CS-953	-1.78072	0.0106129	Mulching/DeepPlowing_N_CM
Brevibacillus_sp._SKDU10	-1.77739	0.00480135	Mulching/DeepPlowing_N_CM
Schumannella_luteola	1.77701	0.00777458	Mulching/DeepPlowing_N_CM
Sphingobacterium_sp._PM2-P1-29	-1.77693	0.0338606	Mulching/DeepPlowing_G_CM
Porphyrobacter_sp.	-1.77502	0.0399835	Mulching/DeepPlowing_N_CM
Novosphingobium_sp._SG726	1.77182	0.0242675	Mulching/DeepPlowing_N_CM
uncultured_Sulfurovum_sp.	-1.77008	0.0349299	Mulching/DeepPlowing_G_CM
Arthrobacter_phage_Qui	1.76615	0.0214137	Mulching/DeepPlowing_G_CM
Neisseria_meningitidis	-1.76608	0.0322364	Mulching/DeepPlowing_N_CM
Streptomyces_sp._150FB	1.76456	0.0141917	Mulching/DeepPlowing_N_CM
Sphingobacterium_psychroaquaticum	-1.76174	0.0053165	Mulching/DeepPlowing_G_CM
Candidatus_Staskawiczbacteria_bacterium_RIFCSPLOWO2_01_FULL_38_12b	-1.76088	0.0354177	Mulching/DeepPlowing_G_CM
Herbiconiux_sp._SALV-R1	1.7594	0.0141917	Mulching/DeepPlowing_N_CM
Micrococcales_bacterium_72-143	1.75378	0.0106129	Mulching/DeepPlowing_N_CM
Streptomyces_viridosporus	1.75298	0.0399835	Mulching/DeepPlowing_N_CM
Streptomyces_sp._NRRL_WC-3604	1.75282	0.0337003	Mulching/DeepPlowing_N_CM
Arthrobacter_sp._49Tsu3.1M3	1.75115	0.00616675	Mulching/DeepPlowing_N_CM
Gordonia_terrae	-1.74233	0.00697066	Mulching/DeepPlowing_G_CM
Arthrobacter_sp._ZGTC131	1.74141	0.0244344	Mulching/DeepPlowing_G_CM
Streptomyces_phage_Yara	-1.74006	0.0187577	Mulching/DeepPlowing_N_CM
Glaciihabitans_arcticus	1.73838	0.0314685	Mulching/DeepPlowing_N_CM
Shewanella_sp._CG_4_10_14_0_8_um_filter_42_13	-1.73802	0.014177	Mulching/DeepPlowing_N_CM
Candidatus_Nomurabacteria_bacterium_RIFCSPHIGHO2_02_FULL_42_19	-1.73668	0.0290153	Mulching/DeepPlowing_G_CM
Protaetiibacter_intestinalis	1.73523	0.0314685	Mulching/DeepPlowing_N_CM
Arthrobacter_sp._KBS0703	1.73385	0.0244344	Mulching/DeepPlowing_G_CM
Romboutsia_sp.	-1.73327	0.0456763	Mulching/DeepPlowing_G_CM
Bacteroides_fragilis	-1.73229	0.0227205	Mulching/DeepPlowing_G_CM
Salinibacterium_sp._ZJ450	1.73161	0.00777458	Mulching/DeepPlowing_N_CM
Candidatus_Saccharibacteria_bacterium_RIFCSPLOWO2_01_FULL_48_13	-1.7306	0.0399835	Mulching/DeepPlowing_G_CM
Isoptericola_sp._CG_20/1183	1.73057	0.0496449	Mulching/DeepPlowing_N_CM
Streptomyces_sp._Ls2151	1.72981	0.0420777	Mulching/DeepPlowing_N_CM
Arthrobacter_sp._Soil736	1.72964	0.0314685	Mulching/DeepPlowing_G_CM
Candidatus_Babela_massiliensis	-1.72795	0.0141917	Mulching/DeepPlowing_N_CM
Bacillus_sp._REN51N	-1.72437	0.0445654	Mulching/DeepPlowing_G_CM
Ectothiorhodospira_magna	-1.72421	0.0418353	Mulching/DeepPlowing_N_CM
Arthrobacter_phage_Racecar	1.72273	0.0339769	Mulching/DeepPlowing_G_CM
Botryosphaeria_dothidea	1.71988	0.0170611	Mulching/DeepPlowing_N_CM
Sinomonas_atrocyanea	1.71817	0.0104046	Mulching/DeepPlowing_N_CM
Candidatus_Latescibacteria_bacterium_4484_181	-1.71719	0.00530044	Mulching/DeepPlowing_N_CM
Vogesella_perlucida	-1.71596	0.0337003	Mulching/DeepPlowing_N_CM
Marinilabilia_salmonicolor	-1.71587	0.0314685	Mulching/DeepPlowing_N_CM
Achromobacter_insolitus	-1.71447	0.00399013	Mulching/DeepPlowing_N_CM
Candidatus_Daviesbacteria_bacterium_RIFCSPHIGHO2_02_FULL_36_13	-1.71425	0.0120418	Mulching/DeepPlowing_G_CM
miscellaneous_Crenarchaeota_group-1_archaeon_SG8-32-1	-1.71406	0.0300267	Mulching/DeepPlowing_N_CM
Gordonia_virus_Suzy	-1.71347	0.0496449	Mulching/DeepPlowing_N_CM
Roseobacter_sp._AzwK-3b	-1.71334	0.0193625	Mulching/DeepPlowing_G_CM
Polynucleobacter_yangtzensis	-1.71119	0.0496449	Mulching/DeepPlowing_N_CM
Diaminobutyricimonas_sp._LJ205	1.70951	0.0106129	Mulching/DeepPlowing_N_CM
Microbacterium_sediminis	1.70363	0.0133708	Mulching/DeepPlowing_N_CM
Schumannella_sp._10F1B-5-1	1.70015	0.0141917	Mulching/DeepPlowing_N_CM
[Pseudomonas]_geniculata	1.69962	0.0304245	Mulching/DeepPlowing_N_CM
Janthinobacterium_sp._PC23-8	-1.69652	0.0187577	Mulching/DeepPlowing_N_CM
Arthrobacter_sp._AFG20	1.69599	0.0399835	Mulching/DeepPlowing_G_CM
Yasminevirus_sp._GU-2018	-1.69501	0.00400046	Mulching/DeepPlowing_N_CM
Freshwater_phage_uvFW-CGR-AMD-COM-C449	-1.69441	0.0338606	Mulching/DeepPlowing_N_CM
Blastopirellula_sp.	-1.69323	0.0187577	Mulching/DeepPlowing_G_CM
Marinobacter_segnicrescens	-1.69299	0.0399835	Mulching/DeepPlowing_G_CM
Thermomonas_sp._HDW16	1.69084	0.0244344	Mulching/DeepPlowing_G_CM
Rhodobacteraceae_bacterium_R_SAG2	-1.69084	0.0139501	Mulching/DeepPlowing_G_CM
Marinifilum_flexuosum	-1.68734	0.0399835	Mulching/DeepPlowing_G_CM
Streptomyces_sp._HIT-DPA4	1.68336	0.0141917	Mulching/DeepPlowing_N_CM
Candidatus_Yanofskybacteria_bacterium_RIFCSPLOWO2_01_FULL_39_28	-1.68241	0.0337003	Mulching/DeepPlowing_N_CM
Agromyces_sp._Root81	1.67958	0.00399013	Mulching/DeepPlowing_N_CM
Kiritimatiellaceae_bacterium	-1.67837	0.00123406	Mulching/DeepPlowing_N_CM
Paracoccus_versutus	-1.6739	0.0187577	Mulching/DeepPlowing_G_CM
Arthrobacter_sp._SDTb3-6	1.67204	0.00777458	Mulching/DeepPlowing_G_CM
Haloactinobacterium_sp._F300	1.67131	0.0187577	Mulching/DeepPlowing_N_CM
Microgenomates_group_bacterium_Gr01-1014_5	-1.66992	0.00463274	Mulching/DeepPlowing_N_CM
Limnobacter_sp._LZ-4	-1.66836	0.0118053	Mulching/DeepPlowing_N_CM
Candidatus_Pacebacteria_bacterium_CG_4_10_14_0_8_um_filter_43_12	-1.66817	0.0151648	Mulching/DeepPlowing_G_CM
Agreia_bicolorata	1.66805	0.015117	Mulching/DeepPlowing_N_CM
Parachlamydia_acanthamoebae	-1.66707	0.0244344	Mulching/DeepPlowing_G_CM
Planctomycetes_bacterium_TBK1r	-1.66599	0.0399835	Mulching/DeepPlowing_G_CM
Candidatus_Zambryskibacteria_bacterium_RIFCSPLOWO2_12_FULL_39_45	-1.66306	0.036411	Mulching/DeepPlowing_N_CM
Candidatus_Amesbacteria_bacterium_GW2011_GWA2_42_12	-1.66101	0.0445654	Mulching/DeepPlowing_G_CM
Arthrobacter_sp._NEAU-SA2	1.66081	0.00198698	Mulching/DeepPlowing_N_CM
Fusarium_venenatum	1.66045	0.0129436	Mulching/DeepPlowing_G_CM
Diaporthe_longicolla	1.65857	0.0104046	Mulching/DeepPlowing_N_CM
Flavobacterium_sp._ZT3R18	-1.65717	0.0117204	Mulching/DeepPlowing_G_CM
Microbacterium_saperdae	1.65622	0.00463274	Mulching/DeepPlowing_N_CM
Achromobacter_insuavis	-1.65589	0.0187577	Mulching/DeepPlowing_G_CM
Candidatus_Lloydbacteria_bacterium_RIFOXYC12_FULL_46_25	-1.65582	0.0159315	Mulching/DeepPlowing_G_CM
Candidatus_Nomurabacteria_bacterium_GW2011_GWB1_40_7	-1.64989	0.00825594	Mulching/DeepPlowing_G_CM
Candidatus_Daviesbacteria_bacterium_GW2011_GWA1_38_7	-1.64659	0.014042	Mulching/DeepPlowing_G_CM
Massilia_sp._ML15P13	1.6432	0.0141917	Mulching/DeepPlowing_G_CM
Streptomyces_sp._SW4	1.64198	0.0468914	Mulching/DeepPlowing_N_CM
Acidovorax_sp._T1	-1.6409	0.0026255	Mulching/DeepPlowing_N_CM
Desulfovibrio_sp._6_1_46AFAA	-1.63869	0.00480135	Mulching/DeepPlowing_N_CM
Stenotrophomonas_sp._Y	1.63628	0.0314685	Mulching/DeepPlowing_N_CM
Gemmata_massiliana	-1.6356	0.0187577	Mulching/DeepPlowing_N_CM
Idiomarina_xiamenensis	-1.6339	0.0430029	Mulching/DeepPlowing_N_CM
Pithovirus_LCPAC403	-1.63279	0.0108604	Mulching/DeepPlowing_N_CM
Ignavibacteriae_bacterium_HGW-Ignavibacteriae-1	-1.63119	0.0290153	Mulching/DeepPlowing_G_CM
Microbacteriaceae_bacterium_J5903	1.62827	0.0244344	Mulching/DeepPlowing_N_CM
Parcubacteria_group_bacterium_GW2011_GWA2_36_10	-1.62811	0.0456763	Mulching/DeepPlowing_G_CM
Marinobacter_sp._NP-4(2019)	-1.6276	0.0141917	Mulching/DeepPlowing_G_CM
Arthrobacter_sp._H-02-3	1.62559	0.0314685	Mulching/DeepPlowing_G_CM
Methylobacterium_sp._XJLW	-1.62238	0.0338606	Mulching/DeepPlowing_N_CM
Xanthomonas_euvesicatoria	1.62105	0.0399835	Mulching/DeepPlowing_G_CM
Microbacterium_sp._C448	1.62061	0.00777458	Mulching/DeepPlowing_N_CM
Lysinimonas_sp._KACC_19322	1.62008	0.0141917	Mulching/DeepPlowing_N_CM
Sphingobacterium_sp._PM2-P1-29	-1.61993	0.0110555	Mulching/DeepPlowing_N_CM
Janthinobacterium_sp._MP5059B	-1.61983	0.0139501	Mulching/DeepPlowing_N_CM
Sulfitobacter_pseudonitzschiae	-1.61874	0.0314685	Mulching/DeepPlowing_G_CM
Lysobacter_pythonis	1.6175	0.0399835	Mulching/DeepPlowing_G_CM
Methylobacterium_sp._XJLW	-1.61674	0.0235696	Mulching/DeepPlowing_G_CM
Candidatus_Kaiserbacteria_bacterium_RIFCSPLOWO2_02_FULL_51_13	-1.61457	0.0229511	Mulching/DeepPlowing_G_CM
Leifsonia_sp.	1.61404	0.0314685	Mulching/DeepPlowing_N_CM
Sciscionella_sp._SE31	-1.61365	0.0187577	Mulching/DeepPlowing_N_CM
Arthrobacter_sp._Y81	1.60996	0.0314685	Mulching/DeepPlowing_G_CM
Paenibacillus_koleovorans	-1.60785	0.0314685	Mulching/DeepPlowing_N_CM
Polynucleobacter_sp._UB-Domo-W1	-1.60774	0.00845504	Mulching/DeepPlowing_N_CM
Chloroflexi_bacterium_13_1_40CM_4_68_4	1.60736	0.0314685	Mulching/DeepPlowing_N_CM
Nannocystis_sp.	-1.60611	0.0106129	Mulching/DeepPlowing_N_CM
Microbacterium_virus_Krampus	-1.60594	0.0236102	Mulching/DeepPlowing_N_CM
Polaromonas_sp._CG9_12	-1.60487	0.0187577	Mulching/DeepPlowing_N_CM
Lysobacter_ruishenii	1.60444	0.0314685	Mulching/DeepPlowing_G_CM
Candidatus_Roizmanbacteria_bacterium_CG10_big_fil_rev_8_21_14_0_10_39_12	-1.60411	0.0108604	Mulching/DeepPlowing_G_CM
Streptomyces_adustus	1.60349	0.00399013	Mulching/DeepPlowing_N_CM
marine_actinobacterium_PHSC20C1	1.60214	0.0314685	Mulching/DeepPlowing_N_CM
Ochrobactrum_pituitosum	-1.60213	0.0106129	Mulching/DeepPlowing_G_CM
Leptolyngbyaceae_cyanobacterium_SM1_4_3	-1.60073	0.000781571	Mulching/DeepPlowing_N_CM
Burkholderia_sp._KK1	-1.60071	0.0244344	Mulching/DeepPlowing_N_CM
Thermomonas_sp._SY21	1.59947	0.0399835	Mulching/DeepPlowing_G_CM
Streptomyces_phage_Wakanda	1.59702	0.0430029	Mulching/DeepPlowing_G_CM
[Microbacterium]_sp._SLBN-1	1.59664	0.0399835	Mulching/DeepPlowing_N_CM
Candidatus_Gottesmanbacteria_bacterium_GW2011_GWA1_34_13	-1.59599	0.0214137	Mulching/DeepPlowing_N_CM
Isosphaera_pallida	-1.59542	0.00275607	Mulching/DeepPlowing_G_CM
Mesorhizobium_sp._B2-8-9	-1.59515	0.00399013	Mulching/DeepPlowing_G_CM
Lacisediminihabitans_profunda	1.59514	0.0141917	Mulching/DeepPlowing_N_CM
Pseudonocardia_sp._SCN_73-27	-1.59385	0.0399835	Mulching/DeepPlowing_G_CM
Hyphomicrobiaceae_bacterium	-1.59353	0.0399835	Mulching/DeepPlowing_N_CM
Vulcaniibacterium_gelatinicum	1.59298	0.0314685	Mulching/DeepPlowing_G_CM
Pricia_antarctica	-1.59197	0.0106129	Mulching/DeepPlowing_N_CM
Amycolatopsis_pithecelloba	1.59189	0.0106129	Mulching/DeepPlowing_N_CM
Frankia_sp._EUN1f	-1.59137	0.00777458	Mulching/DeepPlowing_G_CM
Bdellovibrio_sp._qaytius	-1.5891	0.00123406	Mulching/DeepPlowing_G_CM
Candidatus_Hydrogenedentes_bacterium_ADurb.Bin101	-1.58816	0.0399835	Mulching/DeepPlowing_N_CM
Bacteroides_fragilis	-1.58774	0.0257014	Mulching/DeepPlowing_N_CM
Agreia_sp._Leaf283	1.5868	0.0399835	Mulching/DeepPlowing_N_CM
Planctomycetes_bacterium_UTPLA1	-1.5846	0.00123406	Mulching/DeepPlowing_G_CM
Arthrobacter_sp._SW1	1.58234	0.000781571	Mulching/DeepPlowing_G_CM
Acinetobacter_indicus	-1.58134	0.0314685	Mulching/DeepPlowing_N_CM
Tabrizicola_sp._DRYC-M-16	-1.58068	0.0265857	Mulching/DeepPlowing_G_CM
Desulfotomaculum_sp.	-1.5804	0.0314685	Mulching/DeepPlowing_G_CM
Myxococcus_virescens	-1.57822	0.0244344	Mulching/DeepPlowing_G_CM
Lysobacter_sp._WF-2	1.5781	0.0399835	Mulching/DeepPlowing_G_CM
Streptomyces_sp._F-7	1.57687	0.0162905	Mulching/DeepPlowing_N_CM
Verticillium_nonalfalfae	1.57245	0.0129436	Mulching/DeepPlowing_N_CM
Candidatus_Yanofskybacteria_bacterium_RIFCSPLOWO2_01_FULL_39_28	-1.57228	0.0418353	Mulching/DeepPlowing_G_CM
Pseudomonas_moraviensis	-1.57196	0.00777458	Mulching/DeepPlowing_G_CM
Candidatus_Nomurabacteria_bacterium_RIFCSPLOWO2_01_FULL_39_17	-1.57181	0.0124763	Mulching/DeepPlowing_N_CM
Aurantimicrobium_minutum	-1.57004	0.0399835	Mulching/DeepPlowing_N_CM
Megaviridae_environmental_sample	-1.56921	0.0418353	Mulching/DeepPlowing_N_CM
Chryseoglobus_sp._CTD02-10-2	1.56876	0.0187577	Mulching/DeepPlowing_N_CM
Bacteroidetes/Chlorobi_group_bacterium_ChocPot_Mid	-1.56872	0.0349299	Mulching/DeepPlowing_G_CM
Salinibacterium_xinjiangense	1.56584	0.0244344	Mulching/DeepPlowing_N_CM
Desulfovibrio_sp._U5L	-1.56457	0.0118053	Mulching/DeepPlowing_N_CM
Streptomyces_sp._uw30	1.5644	0.0337003	Mulching/DeepPlowing_N_CM
Candidatus_Nomurabacteria_bacterium_RIFCSPLOWO2_01_FULL_46_18	-1.56305	0.0376219	Mulching/DeepPlowing_N_CM
Psychrobacter_pygoscelis	-1.56301	0.0184658	Mulching/DeepPlowing_G_CM
Glaciihabitans_tibetensis	1.56086	0.0399835	Mulching/DeepPlowing_N_CM
Rhodospirillales_bacterium_RIFCSPLOWO2_12_FULL_58_28	1.55994	0.0314685	Mulching/DeepPlowing_G_CM
Symploca_sp._SIO2D2	-1.55943	0.0399835	Mulching/DeepPlowing_G_CM
Homoserinibacter_sp._GY_40078	1.55836	0.00777458	Mulching/DeepPlowing_N_CM
Trichoderma_atroviride	1.55664	0.0227205	Mulching/DeepPlowing_N_CM
Planctomycetes_bacterium_Poly21	-1.551	0.0106129	Mulching/DeepPlowing_G_CM
Elizabethkingia_miricola	-1.54987	0.0420777	Mulching/DeepPlowing_G_CM
Blastopirellula_marina	-1.54822	0.0314685	Mulching/DeepPlowing_G_CM
Mesorhizobium_sp._M1B.F.Ca.ET.045.04.1.1	1.54781	0.00275607	Mulching/DeepPlowing_N_CM
Nocardiopsis_dassonvillei	1.54706	0.00275607	Mulching/DeepPlowing_N_CM
Loktanella_atrilutea	-1.54703	0.037878	Mulching/DeepPlowing_G_CM
Leifsonia_sp._C5G2	1.54634	0.00147011	Mulching/DeepPlowing_N_CM
Candidatus_Nomurabacteria_bacterium_RIFCSPLOWO2_01_FULL_46_18	-1.54624	0.0159315	Mulching/DeepPlowing_G_CM
Pseudomonas_sp._443	1.54435	0.0244344	Mulching/DeepPlowing_G_CM
Bacteroidetes_bacterium_4572_77	-1.54365	0.00797156	Mulching/DeepPlowing_G_CM
Candidatus_Beckwithbacteria_bacterium_CG23_combo_of_CG06-09_8_20_14_all_34_8	-1.54187	0.0183534	Mulching/DeepPlowing_G_CM
Deinococcus_sp._JMULE3	-1.5401	0.0369884	Mulching/DeepPlowing_N_CM
Pseudoxanthomonas_sp._NML171591	1.5383	0.0141917	Mulching/DeepPlowing_G_CM
Betaproteobacteria_bacterium_CG2_30_59_46	-1.53815	0.00275607	Mulching/DeepPlowing_G_CM
Bacteroidetes_bacterium_RIFCSPLOWO2_12_FULL_31_6	-1.53797	0.00794144	Mulching/DeepPlowing_G_CM
Leifsonia_xyli	1.53659	0.0141917	Mulching/DeepPlowing_N_CM
Pseudomonas_sp._OV529	1.53018	0.00195507	Mulching/DeepPlowing_N_CM
Microbacterium_sp._3290	1.5295	0.000493624	Mulching/DeepPlowing_N_CM
Planctomycetes_bacterium_Pan110	-1.52783	0.0399835	Mulching/DeepPlowing_G_CM
Arcicella_aurantiaca	-1.52736	0.0141917	Mulching/DeepPlowing_G_CM
Pseudarthrobacter_oxydans	1.5273	0.0244344	Mulching/DeepPlowing_G_CM
Phytoactinopolyspora_endophytica	1.52699	0.0133708	Mulching/DeepPlowing_N_CM
Streptomyces_exfoliatus	1.52427	0.00803887	Mulching/DeepPlowing_N_CM
Cyanobacteria_bacterium_PR.3.49	-1.52362	0.0314685	Mulching/DeepPlowing_G_CM
Chlamydiales_bacterium_STE3	-1.52332	0.000401039	Mulching/DeepPlowing_N_CM
Methylobacterium_sp._17Sr1-39	-1.52326	0.0314685	Mulching/DeepPlowing_N_CM
Lysobacter_oculi	1.5218	0.0314685	Mulching/DeepPlowing_G_CM
Bacteroides_thetaiotaomicron	-1.52119	0.047584	Mulching/DeepPlowing_G_CM
Pantoea_ananatis	1.52007	0.018664	Mulching/DeepPlowing_N_CM
Candidatus_Daviesbacteria_bacterium_GW2011_GWA2_38_24	-1.51962	0.0338606	Mulching/DeepPlowing_G_CM
Lysobacter_sp._Root690	1.5194	0.0399835	Mulching/DeepPlowing_G_CM
Plesiocystis_pacifica	-1.51771	0.0187577	Mulching/DeepPlowing_N_CM
Fusarium_verticillioides	1.51696	0.00360816	Mulching/DeepPlowing_N_CM
Malikia_granosa	-1.51696	0.0244344	Mulching/DeepPlowing_G_CM
Aurantimonas_sp._22II-16-19i	-1.5162	0.00563554	Mulching/DeepPlowing_G_CM
Candidatus_Jacksonbacteria_bacterium	-1.51576	0.0331491	Mulching/DeepPlowing_G_CM
Pseudoxanthomonas_sp._OG2	1.51536	0.00777458	Mulching/DeepPlowing_G_CM
Lacipirellula_parvula	-1.51325	0.0314685	Mulching/DeepPlowing_G_CM
Litoreibacter_sp._LN3S51	-1.51301	0.0314685	Mulching/DeepPlowing_G_CM
Arthrobacter_sp._KBS0702	1.51265	0.0170611	Mulching/DeepPlowing_N_CM
Labrenzia_alexandrii	-1.51093	0.0314685	Mulching/DeepPlowing_G_CM
Candidatus_Uhrbacteria_bacterium_GW2011_GWF2_41_430	-1.50993	0.0108628	Mulching/DeepPlowing_N_CM
Gemmobacter_sp._YIM_102744-1	-1.50806	0.0159315	Mulching/DeepPlowing_G_CM
Brumimicrobium_mesophilum	-1.50738	0.0108628	Mulching/DeepPlowing_G_CM
TM7_phylum_sp._oral_taxon_351	-1.5069	0.0053165	Mulching/DeepPlowing_G_CM
Candidatus_Roizmanbacteria_bacterium_RIFOXYD1_FULL_38_12	-1.50636	0.00966455	Mulching/DeepPlowing_G_CM
Candidatus_Roizmanbacteria_bacterium_RIFOXYD1_FULL_41_24	-1.50563	0.0208858	Mulching/DeepPlowing_G_CM
Sphingobacterium_sp._ML3W	-1.5034	0.00563554	Mulching/DeepPlowing_N_CM
Streptomyces_sp._CS113	1.50269	0.045811	Mulching/DeepPlowing_N_CM
Candidatus_Komeilibacteria_bacterium_CG10_big_fil_rev_8_21_14_0_10_36_65	-1.50225	0.0338606	Mulching/DeepPlowing_G_CM
Stenotrophomonas_sp._TD3	1.50053	0.00275607	Mulching/DeepPlowing_N_CM
Erwinia_virus_EaH1	-1.49906	0.0338606	Mulching/DeepPlowing_N_CM
Rhodopirellula_solitaria	-1.49854	0.0141917	Mulching/DeepPlowing_G_CM
Amanita_muscaria	-1.49444	0.010286	Mulching/DeepPlowing_N_CM
Agromyces_sp._Leaf222	1.49426	0.0421538	Mulching/DeepPlowing_N_CM
Microbacterium_lindanitolerans	1.49398	0.00399013	Mulching/DeepPlowing_N_CM
Modestobacter_sp._DSM_46791	-1.49205	0.00399013	Mulching/DeepPlowing_G_CM
Salinibacterium_sp._ZJ77	1.4905	0.0141917	Mulching/DeepPlowing_N_CM
Pseudomonas_sp._NFR16	-1.48985	0.0300267	Mulching/DeepPlowing_N_CM
Sulfuriferula_sp.	-1.48899	0.0106129	Mulching/DeepPlowing_N_CM
Mycobacterium_interjectum	-1.48882	0.0236102	Mulching/DeepPlowing_N_CM
Lysobacter_sp._C8-1	1.48571	0.0399835	Mulching/DeepPlowing_G_CM
Gordonia_phage_Confidence	1.48536	0.0338606	Mulching/DeepPlowing_N_CM
Marinobacter_salexigens	-1.4851	0.0271325	Mulching/DeepPlowing_G_CM
Waddlia_chondrophila	-1.48505	0.0269581	Mulching/DeepPlowing_N_CM
Roseovarius_pacificus	-1.48477	0.0300267	Mulching/DeepPlowing_G_CM
Bdellovibrionales_bacterium_RIFOXYD1_FULL_36_51	-1.4835	0.00185109	Mulching/DeepPlowing_N_CM
Sphaerochaeta_sp.	-1.48344	0.00883277	Mulching/DeepPlowing_N_CM
Winogradskyella_sp.	-1.48186	0.00399013	Mulching/DeepPlowing_N_CM
Cupriavidus_sp._USMAA2-4	-1.48116	0.0187577	Mulching/DeepPlowing_G_CM
Corynebacterium-like_bacterium_B27	1.47949	0.00399013	Mulching/DeepPlowing_N_CM
Rhodococcus_sp._05-2255-2A2	-1.47853	0.0338606	Mulching/DeepPlowing_N_CM
Lysobacter_tolerans	1.47764	0.0399835	Mulching/DeepPlowing_G_CM
Lysobacter_lycopersici	1.47733	0.0399835	Mulching/DeepPlowing_G_CM
uncultured_bacterium_pTW3	1.47542	0.0106129	Mulching/DeepPlowing_G_CM
Gordonia_phage_Yikes	-1.47452	0.0308817	Mulching/DeepPlowing_N_CM
Candidatus_Yanofskybacteria_bacterium_RIFOXYD1_FULL_42_10	-1.47446	0.0124763	Mulching/DeepPlowing_N_CM
Cryobacterium_mesophilum	1.47422	0.0399835	Mulching/DeepPlowing_N_CM
Candidatus_Nomurabacteria_bacterium_RIFCSPLOWO2_02_FULL_44_12	-1.47381	0.0271959	Mulching/DeepPlowing_N_CM
Nocardia_sp._348MFTsu5.1	1.47359	0.0420777	Mulching/DeepPlowing_N_CM
Candidatus_Uhrbacteria_bacterium_RIFOXYB2_FULL_45_11	-1.47257	0.0184658	Mulching/DeepPlowing_N_CM
Myxacorys_almedinensis	-1.47072	0.0106129	Mulching/DeepPlowing_G_CM
Chloroflexi_bacterium_13_1_20CM_2_70_9	1.47069	0.0421538	Mulching/DeepPlowing_N_CM
Candidatus_Paracaedibacter_symbiosus	1.46908	0.0421538	Mulching/DeepPlowing_N_CM
Arthrobacter_phage_Brad	1.46905	0.0244344	Mulching/DeepPlowing_G_CM
Aquimarina_agarilytica	-1.46875	0.00567379	Mulching/DeepPlowing_N_CM
Thermomonas_haemolytica	1.46807	0.0314685	Mulching/DeepPlowing_G_CM
Microbacterium_sp._K24	1.46717	0.0399835	Mulching/DeepPlowing_N_CM
Agromyces_sp._LHK192	1.46405	0.0399835	Mulching/DeepPlowing_N_CM
Microbacterium_sp._MYb62	1.46394	0.0104046	Mulching/DeepPlowing_N_CM
bacterium_336/3	-1.46262	0.0244344	Mulching/DeepPlowing_G_CM
Sphingobacteriales_bacterium_TSM_CSS	-1.46243	0.0235696	Mulching/DeepPlowing_G_CM
Acidovorax_sp._T1	-1.46229	0.0420777	Mulching/DeepPlowing_G_CM
Rhodanobacter_spathiphylli	1.46203	0.0314685	Mulching/DeepPlowing_G_CM
Burkholderia_sp._BCC0405	-1.46032	0.0354177	Mulching/DeepPlowing_N_CM
Marinicaulis_flavus	1.45964	0.0187577	Mulching/DeepPlowing_N_CM
Pseudanabaena_yagii	-1.459	0.00463274	Mulching/DeepPlowing_N_CM
Brevibacterium_oceani	1.45768	0.0314685	Mulching/DeepPlowing_N_CM
Luteimonas_mephitis	1.45767	0.0314685	Mulching/DeepPlowing_G_CM
Agromyces_sp._CFH_90414	1.45738	0.0133708	Mulching/DeepPlowing_N_CM
Comamonas_sp._A23	-1.45518	0.00339918	Mulching/DeepPlowing_N_CM
Candidatus_Giovannonibacteria_bacterium	-1.45507	0.014042	Mulching/DeepPlowing_G_CM
Okeania_sp._SIO2B3	-1.4544	0.0445654	Mulching/DeepPlowing_G_CM
Fervidobacterium_pennivorans	-1.45412	0.00258647	Mulching/DeepPlowing_N_CM
Bellilinea_caldifistulae	-1.45316	0.0257014	Mulching/DeepPlowing_G_CM
Pseudomonas_sp._NFACC45	1.45291	0.0399835	Mulching/DeepPlowing_G_CM
Glaciihabitans_sp._INWT7	1.45113	0.0399835	Mulching/DeepPlowing_N_CM
Kitasatospora_viridis	-1.45097	0.0314685	Mulching/DeepPlowing_N_CM
Candidatus_Doudnabacteria_bacterium_RIFCSPLOWO2_12_FULL_49_8	-1.44894	0.0143436	Mulching/DeepPlowing_G_CM
Capnocytophaga_sp._oral_taxon_332	-1.44664	0.0139501	Mulching/DeepPlowing_G_CM
Actinomadura_sp._KC06	1.44648	0.0244344	Mulching/DeepPlowing_N_CM
Cellulosimicrobium_cellulans	1.44609	0.0106129	Mulching/DeepPlowing_N_CM
Phocaeicola_plebeius	-1.44603	0.0338606	Mulching/DeepPlowing_N_CM
Clavibacter_virus_CMP1	-1.44517	0.0335742	Mulching/DeepPlowing_N_CM
Halorhodospira_halochloris	-1.44502	0.00275607	Mulching/DeepPlowing_G_CM
Nitrospira_sp._CR2.1	-1.44419	0.0314685	Mulching/DeepPlowing_N_CM
Leifsonia_sp._Root60	1.44384	0.00399013	Mulching/DeepPlowing_N_CM
Shinella_sp._DD12	-1.44354	0.0106129	Mulching/DeepPlowing_G_CM
candidate_division_WS6_bacterium_GW2011_GWE1_34_7	-1.44264	0.0300267	Mulching/DeepPlowing_N_CM
Candidatus_Yonathbacteria_bacterium_RIFCSPLOWO2_01_FULL_43_27	-1.44176	0.0369884	Mulching/DeepPlowing_G_CM
Dishui_Lake_large_algae_virus_1	-1.44067	0.0183534	Mulching/DeepPlowing_N_CM
Streptomyces_bobili	1.43932	0.0264844	Mulching/DeepPlowing_N_CM
Stenotrophomonas_sp._YR399	1.439	0.00909928	Mulching/DeepPlowing_N_CM
Frankia_sp._EI5c	-1.43683	0.00185109	Mulching/DeepPlowing_G_CM
Agromyces_aureus	1.43147	0.0399835	Mulching/DeepPlowing_N_CM
Paraburkholderia_sp._C35	-1.43146	0.0106129	Mulching/DeepPlowing_N_CM
Candidatus_Komeilibacteria_bacterium_RIFOXYD1_FULL_37_29	-1.43129	0.0199881	Mulching/DeepPlowing_G_CM
Desulfobacter_sp.	-1.43099	0.0265857	Mulching/DeepPlowing_G_CM
Lysobacter_brunescens	1.42909	0.00616675	Mulching/DeepPlowing_G_CM
fungal_sp._No.14919	1.42661	0.0124763	Mulching/DeepPlowing_N_CM
Agromyces_sp._MMS17-SY077	1.4264	0.0214137	Mulching/DeepPlowing_N_CM
Freshwater_phage_uvFW-CGR-AMD-COM-C429	-1.42588	0.045356	Mulching/DeepPlowing_N_CM
Pseudomonas_donghuensis	-1.42354	0.0139501	Mulching/DeepPlowing_G_CM
Methylobacterium_haplocladii	-1.4235	0.0269581	Mulching/DeepPlowing_N_CM
Arthrobacter_phage_Nason	1.42277	0.0468914	Mulching/DeepPlowing_N_CM
Marinobacterium_lutimaris	-1.42266	0.00777458	Mulching/DeepPlowing_G_CM
Lysobacter_sp._zong2l5	1.42258	0.0314685	Mulching/DeepPlowing_G_CM
Alkalinema_sp._RU_4_3	-1.41874	0.00563554	Mulching/DeepPlowing_N_CM
Mesorhizobium_sp._L103C120A0	-1.41837	0.0290153	Mulching/DeepPlowing_N_CM
Streptomyces_graminilatus	1.418	0.00563554	Mulching/DeepPlowing_N_CM
Actinobacteria_bacterium_IMCC26207	-1.41761	8.22707e-05	Mulching/DeepPlowing_G_CM
Streptomyces_huasconensis	1.41701	0.010286	Mulching/DeepPlowing_N_CM
bacterium_M00.F.Ca.ET.155.01.1.1	-1.41672	0.0187577	Mulching/DeepPlowing_N_CM
Actinomadura_hallensis	1.41617	0.0399835	Mulching/DeepPlowing_N_CM
Pseudochelatococcus_lubricantis	-1.4156	0.0314685	Mulching/DeepPlowing_N_CM
Flavobacterium_sandaracinum	-1.41478	0.0208858	Mulching/DeepPlowing_G_CM
Caulobacter_sp._CCH4-E1	-1.41476	0.00777458	Mulching/DeepPlowing_N_CM
Pseudoxanthomonas_sp._Root65	1.41324	0.0244344	Mulching/DeepPlowing_G_CM
Pseudoxanthomonas_sp._NML170316	1.41242	0.00399013	Mulching/DeepPlowing_G_CM
Desulfurobacterium_thermolithotrophum	-1.41232	0.036411	Mulching/DeepPlowing_N_CM
Homoserinimonas_aerilata	1.41097	0.0187577	Mulching/DeepPlowing_N_CM
Amycolatopsis_jejuensis	1.41016	0.0141917	Mulching/DeepPlowing_N_CM
Paenibacillus_silvae	-1.40944	0.010286	Mulching/DeepPlowing_N_CM
Paenibacillus_terrigena	-1.408	0.00825594	Mulching/DeepPlowing_N_CM
Streptomyces_sp._Root55	1.40761	0.036411	Mulching/DeepPlowing_N_CM
Bifidobacterium_scardovii	1.40747	0.0456763	Mulching/DeepPlowing_N_CM
Pseudomonas_asiatica	-1.40629	0.0420777	Mulching/DeepPlowing_N_CM
Arthrobacter_sp._TB_26	1.40618	0.0399835	Mulching/DeepPlowing_G_CM
Candidatus_Pacebacteria_bacterium_CG10_big_fil_rev_8_21_14_0_10_44_11	-1.40605	0.0180195	Mulching/DeepPlowing_G_CM
Psychrobacillus_sp._OK032	-1.40463	0.0322364	Mulching/DeepPlowing_N_CM
uncultured_Lysobacter_sp.	1.40359	0.0399835	Mulching/DeepPlowing_G_CM
Microbacteriaceae_bacterium_VKM_Ac-2854	1.40093	0.00198698	Mulching/DeepPlowing_N_CM
Paraburkholderia_sprentiae	1.40061	0.0026661	Mulching/DeepPlowing_N_CM
Mycobacterium_phage_DrLupo	-1.39752	0.00323459	Mulching/DeepPlowing_N_CM
Streptomyces_sp._AK010	1.39706	0.0271959	Mulching/DeepPlowing_N_CM
Youngiibacter_fragilis	-1.39699	0.0146492	Mulching/DeepPlowing_N_CM
Lysobacter_sp._cf310	1.39625	0.0314685	Mulching/DeepPlowing_G_CM
Nocardia_sp._FDAARGOS_372	1.39522	0.0456763	Mulching/DeepPlowing_N_CM
Myxococcaceae_bacterium	-1.39517	0.0314685	Mulching/DeepPlowing_N_CM
Janthinobacterium_sp._BJB303	-1.39384	0.0322364	Mulching/DeepPlowing_N_CM
Acidobacteria_bacterium_ADurb.Bin051	-1.39377	0.0244344	Mulching/DeepPlowing_G_CM
Actinobacteria_bacterium_RBG_19FT_COMBO_36_27	-1.3937	0.0143436	Mulching/DeepPlowing_N_CM
Acinetobacter_lwoffii	-1.39297	0.0468914	Mulching/DeepPlowing_N_CM
Nocardia_donostiensis	1.39272	0.0236102	Mulching/DeepPlowing_N_CM
Dysgonomonas_macrotermitis	-1.39113	0.00641585	Mulching/DeepPlowing_G_CM
Pseudomonas_virus_PaMx74	-1.39006	0.0338606	Mulching/DeepPlowing_N_CM
Paracoccus_aminophilus	-1.38934	0.00399013	Mulching/DeepPlowing_G_CM
Acidobacteria_bacterium_ADurb.Bin340	-1.388	0.0314685	Mulching/DeepPlowing_G_CM
Micrococcus_luteus	-1.38703	0.036411	Mulching/DeepPlowing_G_CM
Microcella_alkaliphila	1.38602	0.0314685	Mulching/DeepPlowing_N_CM
Hymenobacter_sp._92R-1	-1.38602	0.0314685	Mulching/DeepPlowing_N_CM
Fimbriiglobus_ruber	-1.38286	0.00777458	Mulching/DeepPlowing_G_CM
Lysobacter_sp._YJ15	1.38199	0.0244344	Mulching/DeepPlowing_G_CM
Rhizobium_sp._AN5	1.38085	0.0399835	Mulching/DeepPlowing_N_CM
Colletotrichum_sidae	1.37988	0.0291715	Mulching/DeepPlowing_N_CM
Petrimonas_sp.	-1.37767	0.0338606	Mulching/DeepPlowing_N_CM
Bacteriovorax_sp._Seq25_V	-1.37734	0.0349299	Mulching/DeepPlowing_G_CM
Flavobacterium_hydatis	-1.37495	0.0108604	Mulching/DeepPlowing_G_CM
Acidiphilium_sp._20-67-58	-1.37306	0.0468914	Mulching/DeepPlowing_N_CM
Yonghaparkia_sp._GA224	1.3727	0.0314685	Mulching/DeepPlowing_N_CM
Lysobacter_sp._ZS60	1.37156	0.0314685	Mulching/DeepPlowing_G_CM
Peptococcaceae_bacterium_BRH_c4b	-1.37088	0.0468914	Mulching/DeepPlowing_G_CM
Fomitopsis_rosea	-1.36863	0.0335742	Mulching/DeepPlowing_N_CM
Sediminibacterium_sp._FEMGT703S	-1.36828	0.0026661	Mulching/DeepPlowing_G_CM
Phycicoccus_jejuensis	-1.36782	0.00267396	Mulching/DeepPlowing_N_CM
Mycobacterium_botniense	-1.3677	0.00886043	Mulching/DeepPlowing_G_CM
Microbacteriaceae_bacterium_WY83	1.3666	0.0399835	Mulching/DeepPlowing_N_CM
Streptomyces_mangrovisoli	1.36424	0.010286	Mulching/DeepPlowing_N_CM
Gordonia_phage_Sadboi	-1.36368	0.0114161	Mulching/DeepPlowing_N_CM
Gordonia_phage_Gibbous	1.36364	0.0139501	Mulching/DeepPlowing_G_CM
Anaerotruncus_colihominis	-1.36274	0.00258647	Mulching/DeepPlowing_N_CM
Candidatus_Lloydbacteria_bacterium_RIFCSPHIGHO2_02_FULL_50_13	-1.36106	0.00616675	Mulching/DeepPlowing_N_CM
Spirochaetes_bacterium_ADurb.Bin001	-1.36085	0.0338606	Mulching/DeepPlowing_G_CM
Mycolicibacterium_phlei	-1.36021	0.037878	Mulching/DeepPlowing_N_CM
Chromobacterium_haemolyticum	-1.35906	0.0399835	Mulching/DeepPlowing_N_CM
Oscillatoriales_cyanobacterium_JSC-12	-1.35743	0.00185109	Mulching/DeepPlowing_N_CM
Lysobacter_sp._17J7-1	1.35591	0.0314685	Mulching/DeepPlowing_G_CM
Lysobacter_sp._CHu50b-3-2	1.35589	0.0399835	Mulching/DeepPlowing_G_CM
Lysobacter_sp._Root916	1.35535	0.0399835	Mulching/DeepPlowing_G_CM
Phocaeicola_plebeius	-1.35521	0.0379494	Mulching/DeepPlowing_G_CM
Desulfovibrio_piger	-1.35494	0.0180195	Mulching/DeepPlowing_N_CM
Paenibacillus_dendritiformis	-1.35466	0.0296561	Mulching/DeepPlowing_N_CM
Frankia_saprophytica	1.35466	0.00185109	Mulching/DeepPlowing_N_CM
Cellulophaga_virus_ST	-1.35376	0.00057874	Mulching/DeepPlowing_N_CM
Micromonospora_sp._HSS6-12	1.35279	0.0170611	Mulching/DeepPlowing_N_CM
Terribacillus_saccharophilus	1.35271	0.0271325	Mulching/DeepPlowing_N_CM
Microbacterium_telephonicum	1.35241	0.00777458	Mulching/DeepPlowing_N_CM
Microbacterium_sp._HSID17254	-1.35127	0.037878	Mulching/DeepPlowing_N_CM
Deinococcus_aquatilis	-1.35061	0.0468914	Mulching/DeepPlowing_G_CM
Thaumarchaeota_archaeon	1.35035	0.0314685	Mulching/DeepPlowing_N_CM
Microgenomates_group_bacterium_Gr01-1014_5	-1.34956	0.0216164	Mulching/DeepPlowing_G_CM
Streptomyces_sp._RLB1-33	1.34944	0.00275607	Mulching/DeepPlowing_N_CM
Candidatus_Babela_massiliensis	-1.34875	0.0271959	Mulching/DeepPlowing_G_CM
Bradyrhizobium_sp._Ai1a-2	-1.34843	0.0399835	Mulching/DeepPlowing_G_CM
Aquimarina_sp._Aq78	-1.34842	0.0314685	Mulching/DeepPlowing_N_CM
Lysobacter_sp._UKS-15	1.34817	0.0314685	Mulching/DeepPlowing_G_CM
Candidatus_Microthrix_parvicella	-1.34806	0.00777458	Mulching/DeepPlowing_G_CM
Streptomyces_sp._SID5785	1.34684	0.0271959	Mulching/DeepPlowing_N_CM
Trametes_pubescens	-1.34481	0.00057874	Mulching/DeepPlowing_N_CM
Streptomyces_sp._FT05W	1.34458	0.00493457	Mulching/DeepPlowing_G_CM
Yonghaparkia_alkaliphila	1.34406	0.0187577	Mulching/DeepPlowing_N_CM
Candidatus_Roizmanbacteria_bacterium_RIFCSPLOWO2_02_FULL_40_13	-1.34331	0.0257014	Mulching/DeepPlowing_G_CM
Candidatus_Uhrbacteria_bacterium_RIFOXYB2_FULL_45_11	-1.34317	0.0120418	Mulching/DeepPlowing_G_CM
Pseudoxanthomonas_sp._GM95	1.34237	0.0187577	Mulching/DeepPlowing_G_CM
Agromyces_albus	1.34162	0.0399835	Mulching/DeepPlowing_N_CM
Coxiellaceae_bacterium_RA15029	1.3398	0.0271959	Mulching/DeepPlowing_N_CM
Eubacterium_sp.	-1.3395	0.0218189	Mulching/DeepPlowing_N_CM
Microbacterium_sp._L-031	1.33933	0.0106129	Mulching/DeepPlowing_N_CM
Xylaria_grammica	1.33835	0.0159315	Mulching/DeepPlowing_N_CM
Chloroflexi_bacterium_RBG_13_53_26	-1.33783	0.0337003	Mulching/DeepPlowing_G_CM
Prevotella_sp.	-1.33661	0.0354177	Mulching/DeepPlowing_G_CM
Acanthamoeba_polyphaga_mimivirus	1.33638	0.000401039	Mulching/DeepPlowing_G_CM
Deltaproteobacteria_bacterium_RBG_16_66_15	1.33574	0.00567379	Mulching/DeepPlowing_N_CM
Thermogutta_sp.	-1.33407	0.0187577	Mulching/DeepPlowing_G_CM
Chloroflexi_bacterium_RBG_16_57_8	-1.3338	0.0106129	Mulching/DeepPlowing_G_CM
Paraburkholderia_sp._RP-4-7	-1.33287	0.0133838	Mulching/DeepPlowing_G_CM
Desulfopila_sp._IMCC35008	-1.33242	0.0106129	Mulching/DeepPlowing_N_CM
Rhodobacteraceae_bacterium_CG17_big_fil_post_rev_8_21_14_2_50_65_11	-1.33133	0.0420777	Mulching/DeepPlowing_G_CM
Comamonas_sp._lk	-1.3308	0.0337003	Mulching/DeepPlowing_G_CM
Planctomonas_deserti	1.33072	0.0399835	Mulching/DeepPlowing_N_CM
Arthrobacter_sp._HMWF013	1.33005	0.0187577	Mulching/DeepPlowing_N_CM
Herbiconiux_sp.	1.32891	0.000164541	Mulching/DeepPlowing_N_CM
Pseudochelatococcus_lubricantis	-1.32627	0.0187577	Mulching/DeepPlowing_G_CM
Luteimonas_sp._100069	1.32611	0.0314685	Mulching/DeepPlowing_G_CM
Porticoccaceae_bacterium	-1.32425	0.0314685	Mulching/DeepPlowing_N_CM
Candidatus_Jettenia_caeni	-1.32159	0.0314685	Mulching/DeepPlowing_G_CM
Schumannella_sp._10F1D-1	1.31855	0.0106129	Mulching/DeepPlowing_N_CM
Bradyrhizobium_sp._W	-1.31739	0.0399835	Mulching/DeepPlowing_G_CM
Oscillatoriales_cyanobacterium_JSC-12	-1.31689	0.0106129	Mulching/DeepPlowing_G_CM
Kineococcus_radiotolerans	-1.3168	0.0314685	Mulching/DeepPlowing_G_CM
Massilia_sp._Mn16-1_5	1.31559	0.00777458	Mulching/DeepPlowing_G_CM
Bacteroidetes_bacterium_ADurb.Bin035	-1.31549	0.0338606	Mulching/DeepPlowing_G_CM
Deltaproteobacteria_bacterium_ADurb.BinA014	-1.31546	0.00530044	Mulching/DeepPlowing_G_CM
Martelella_endophytica	-1.31421	0.045356	Mulching/DeepPlowing_G_CM
Microbacterium_phage_NarutoRun	-1.31355	0.01689	Mulching/DeepPlowing_N_CM
Herbidospora_yilanensis	1.31336	0.0339769	Mulching/DeepPlowing_G_CM
Candidatus_Stahlbacteria_bacterium	-1.31166	0.0335742	Mulching/DeepPlowing_G_CM
Microbacterium_phage_Hiddenleaf	-1.3109	0.0314685	Mulching/DeepPlowing_N_CM
Candidatus_Amesbacteria_bacterium_RIFOXYD1_FULL_47_9	-1.31038	0.036411	Mulching/DeepPlowing_G_CM
Candidatus_Giovannonibacteria_bacterium_GW2011_GWA2_45_21	-1.31014	0.0445654	Mulching/DeepPlowing_G_CM
Vibrio_metoecus	1.30993	0.00123406	Mulching/DeepPlowing_N_CM
Verrucomicrobia_bacterium_ADurb.Bin063	-1.30913	0.0399835	Mulching/DeepPlowing_G_CM
Ignavibacteria_bacterium_RIFOXYC2_FULL_35_21	-1.30875	0.0290153	Mulching/DeepPlowing_G_CM
Legionella_sp._km772	-1.30826	0.0418353	Mulching/DeepPlowing_N_CM
Cohnella_sp._OV330	-1.30789	0.00886043	Mulching/DeepPlowing_N_CM
Moelleriella_libera	1.30777	0.0420777	Mulching/DeepPlowing_N_CM
Arthrobacter_sp._ZXY-2	-1.30772	0.0133838	Mulching/DeepPlowing_N_CM
Candidatus_Saccharibacteria_bacterium_CG10_big_fil_rev_8_21_14_0_10_47_8	-1.30688	0.0314685	Mulching/DeepPlowing_G_CM
Desulfosporosinus_lacus	-1.30686	0.0399835	Mulching/DeepPlowing_G_CM
Candidatus_Peregrinibacteria_bacterium_GW2011_GWC2_39_14	-1.30672	0.0420777	Mulching/DeepPlowing_G_CM
Rickettsiales_endosymbiont_of_Stachyamoeba_lipophora	-1.30615	0.0354177	Mulching/DeepPlowing_N_CM
Nocardia_sp._FDAARGOS_372	1.30428	0.0338606	Mulching/DeepPlowing_G_CM
Stenotrophomonas_sp._MYb238	1.30201	0.0399835	Mulching/DeepPlowing_G_CM
Ornatilinea_apprima	-1.30095	0.0399835	Mulching/DeepPlowing_G_CM
Afipia_massiliensis	-1.29986	0.0187577	Mulching/DeepPlowing_G_CM
Subtercola_boreus	1.29964	0.000493624	Mulching/DeepPlowing_N_CM
Synechococcales_cyanobacterium_RM1_1_8	-1.29883	0.0379494	Mulching/DeepPlowing_N_CM
Streptomyces_sp._Z022	1.29865	0.0159897	Mulching/DeepPlowing_N_CM
Planctomycetes_bacterium_Mal33	-1.29727	0.0421538	Mulching/DeepPlowing_N_CM
Chlorobaculum_sp.	-1.29521	0.0337003	Mulching/DeepPlowing_G_CM
Malonomonas_rubra	-1.29498	0.0399835	Mulching/DeepPlowing_N_CM
Burkholderia_glumae	-1.29356	0.0244344	Mulching/DeepPlowing_G_CM
Gordonia_phage_Ranch	-1.29303	0.0187577	Mulching/DeepPlowing_N_CM
Candidatus_Roizmanbacteria_bacterium_RIFCSPLOWO2_01_FULL_41_22	-1.29283	0.0216164	Mulching/DeepPlowing_G_CM
Microbacterium_sp._KCTC_39802	1.29275	0.0141917	Mulching/DeepPlowing_N_CM
Thermincola_ferriacetica	-1.29191	0.0132277	Mulching/DeepPlowing_N_CM
Xanthomonas_sacchari	1.29128	0.0399835	Mulching/DeepPlowing_G_CM
Eudoraea_sp.	-1.29097	0.0314685	Mulching/DeepPlowing_G_CM
Pseudonocardiales_bacterium	-1.2908	0.0314685	Mulching/DeepPlowing_G_CM
Sneathiella_glossodoripedis	-1.28873	0.0399835	Mulching/DeepPlowing_G_CM
Xanthomonas_sp._BRIP62418	1.28758	0.0338606	Mulching/DeepPlowing_N_CM
Microbacterium_sp._18062	1.28626	0.0216164	Mulching/DeepPlowing_N_CM
Microbacterium_yannicii	1.2857	0.00616675	Mulching/DeepPlowing_N_CM
Streptomyces_phage_SparkleGoddess	1.28452	0.0456763	Mulching/DeepPlowing_G_CM
Phaeocystidibacter_marisrubri	-1.28407	0.0338606	Mulching/DeepPlowing_G_CM
Actinomyces_sp.	-1.28314	0.00399013	Mulching/DeepPlowing_G_CM
Halomonas_hydrothermalis	-1.28299	0.0339769	Mulching/DeepPlowing_N_CM
Flavobacterium_frigoris	-1.28216	0.0208912	Mulching/DeepPlowing_G_CM
Blastococcus_sp._TF02A-26	-1.2789	0.0141917	Mulching/DeepPlowing_G_CM
Actinomadura_amylolytica	-1.27599	0.0106129	Mulching/DeepPlowing_G_CM
bacterium_SCN_62-11	-1.27483	0.0216164	Mulching/DeepPlowing_G_CM
Paenarthrobacter_nicotinovorans	1.27475	0.0187577	Mulching/DeepPlowing_N_CM
Arcobacter_trophiarum	-1.27461	0.0183534	Mulching/DeepPlowing_G_CM
Methylobacterium_nodulans	-1.27118	0.0314685	Mulching/DeepPlowing_G_CM
Paraburkholderia_steynii	-1.27102	0.0106129	Mulching/DeepPlowing_N_CM
Pontibacter_pudoricolor	1.27063	0.0141917	Mulching/DeepPlowing_N_CM
Beauveria_bassiana	1.2692	0.0141917	Mulching/DeepPlowing_N_CM
Chitinophaga_sp._Ak27	1.26695	0.0170611	Mulching/DeepPlowing_N_CM
Deltaproteobacteria_bacterium_CG_4_9_14_3_um_filter_44_9	-1.26593	0.00189222	Mulching/DeepPlowing_N_CM
Gramella_forsetii	-1.26538	0.0338606	Mulching/DeepPlowing_N_CM
Mycolicibacterium_pulveris	-1.26521	0.0296561	Mulching/DeepPlowing_G_CM
Pseudomonas_sp._MT-1	-1.26517	0.0183534	Mulching/DeepPlowing_G_CM
Catelliglobosispora_koreensis	-1.26332	0.00777458	Mulching/DeepPlowing_N_CM
Microgenomates_group_bacterium_RBG_16_45_19	-1.2633	0.0143436	Mulching/DeepPlowing_G_CM
Rhodoferax_sp._4810	-1.26324	0.0314685	Mulching/DeepPlowing_G_CM
Arthrobacter_sp._Hiyo4	1.26316	0.0269581	Mulching/DeepPlowing_N_CM
Emericellopsis_sp._1a5	1.26283	0.0304245	Mulching/DeepPlowing_N_CM
Corynebacterium_phage_Cruella	-1.26244	0.0308817	Mulching/DeepPlowing_N_CM
Cellulomonas_shaoxiangyii	1.26208	0.0314685	Mulching/DeepPlowing_G_CM
Gordonia_phage_Chidiebere	-1.26126	0.0456763	Mulching/DeepPlowing_N_CM
Betaproteobacteria_bacterium_CG2_30_59_46	-1.26076	0.00399013	Mulching/DeepPlowing_N_CM
Myxococcus_sp._AB053B	-1.25919	0.0244344	Mulching/DeepPlowing_G_CM
Trichoderma_parareesei	1.25802	0.0371401	Mulching/DeepPlowing_G_CM
Stenotrophomonas_sp._ESTM1D_MKCIP4_1	1.25752	0.0187577	Mulching/DeepPlowing_G_CM
Cryobacterium_arcticum	1.2574	0.037878	Mulching/DeepPlowing_N_CM
Cohnella_sp._6021052837	-1.25678	0.0314685	Mulching/DeepPlowing_G_CM
Acidimicrobiia_bacterium	-1.25505	0.0106129	Mulching/DeepPlowing_G_CM
Myxococcus_sp._AB053B	-1.25451	0.0141917	Mulching/DeepPlowing_N_CM
Parcubacteria_group_bacterium_ADurb.Bin316	-1.25311	0.00966455	Mulching/DeepPlowing_N_CM
Lysobacter_alkalisoli	1.25123	0.0399835	Mulching/DeepPlowing_G_CM
Rhodoplanes_serenus	-1.25047	0.0314685	Mulching/DeepPlowing_G_CM
Bordetella_sp._J329	-1.24815	0.0104046	Mulching/DeepPlowing_N_CM
Agrococcus_jejuensis	1.24793	0.0187577	Mulching/DeepPlowing_N_CM
Capnocytophaga_sp._oral_taxon_332	-1.24445	0.0338606	Mulching/DeepPlowing_N_CM
Salinibacterium_sp._CGMCC_1.16371	1.24372	0.00185109	Mulching/DeepPlowing_N_CM
Streptomyces_sp._SID724	1.24222	0.00622372	Mulching/DeepPlowing_N_CM
Candidatus_Woesebacteria_bacterium_GW2011_GWA1_39_21	-1.24221	0.047584	Mulching/DeepPlowing_G_CM
Rhodococcus_sp._Leaf258	1.24181	0.0337003	Mulching/DeepPlowing_G_CM
Desulfobacter_curvatus	-1.2409	0.0314685	Mulching/DeepPlowing_N_CM
Paraglaciecola_psychrophila	-1.23984	0.0314685	Mulching/DeepPlowing_N_CM
Yarrowia_lipolytica	-1.23948	0.0468914	Mulching/DeepPlowing_N_CM
Actinobacteria_bacterium_ADurb.BinA094	-1.23808	0.0187577	Mulching/DeepPlowing_N_CM
Ralstonia_phage_RpY1	-1.23663	0.0208858	Mulching/DeepPlowing_N_CM
Alphaproteobacteria_bacterium_HGW-Alphaproteobacteria-1	-1.23597	0.0244344	Mulching/DeepPlowing_G_CM
Pseudodesulfovibrio_profundus	-1.23526	0.00616675	Mulching/DeepPlowing_G_CM
Pseudomonas_cannabina	-1.23243	0.0371401	Mulching/DeepPlowing_N_CM
Acidaminobacter_sp.	-1.23144	0.0314685	Mulching/DeepPlowing_N_CM
Rhizobium_sp._GV031	-1.23081	0.0399835	Mulching/DeepPlowing_N_CM
candidate_division_WWE3_bacterium_GW2011_GWB1_41_6	-1.23037	0.0338606	Mulching/DeepPlowing_G_CM
Haematobacter_missouriensis	-1.23027	0.0244344	Mulching/DeepPlowing_G_CM
Agromyces_cerinus	1.23006	0.0399835	Mulching/DeepPlowing_N_CM
Fibrella_aestuarina	-1.22882	0.0399835	Mulching/DeepPlowing_G_CM
Streptomyces_sp._RFCAC02	1.22841	0.00198698	Mulching/DeepPlowing_N_CM
Mesorhizobium_sp._B2-4-16	1.22831	0.00480135	Mulching/DeepPlowing_G_CM
bacterium_BMS3Abin12	-1.22699	0.0170611	Mulching/DeepPlowing_N_CM
Sphingorhabdus_sp.	-1.22667	0.0314685	Mulching/DeepPlowing_N_CM
Arthrobacter_sp._PAMC25564	1.22559	0.0314685	Mulching/DeepPlowing_N_CM
Streptomyces_sp._OF3	1.22552	0.00743216	Mulching/DeepPlowing_N_CM
Pseudoxanthomonas_yeongjuensis	1.2253	0.0314685	Mulching/DeepPlowing_G_CM
Microbacterium_ginsengiterrae	1.22525	0.0192211	Mulching/DeepPlowing_N_CM
Streptomyces_luridiscabiei	1.22524	0.0420777	Mulching/DeepPlowing_N_CM
Pantoea_cypripedii	-1.22483	0.0300267	Mulching/DeepPlowing_N_CM
Comamonas_sp._E6	-1.2247	0.0141917	Mulching/DeepPlowing_N_CM
Agromyces_sp._OV568	1.2231	0.0106129	Mulching/DeepPlowing_N_CM
Methanothermobacter_sp.	-1.22261	0.0338606	Mulching/DeepPlowing_G_CM
Streptomyces_sp._SLBN-115	1.22195	0.00803887	Mulching/DeepPlowing_N_CM
Agromyces_sp._Soil535	1.22133	0.0244344	Mulching/DeepPlowing_N_CM
Salinibacterium_sp._ZJ454	1.21956	0.0106129	Mulching/DeepPlowing_N_CM
Flavihumibacter_solisilvae	1.21887	0.00777458	Mulching/DeepPlowing_G_CM
Candidatus_Atribacteria_bacterium	-1.2176	0.0314685	Mulching/DeepPlowing_N_CM
Arthrobacter_virus_Andrew	1.21532	0.0354177	Mulching/DeepPlowing_G_CM
Moumouvirus	-1.21461	0.0331491	Mulching/DeepPlowing_N_CM
Cronobacter_dublinensis	-1.21293	0.0100507	Mulching/DeepPlowing_N_CM
Flavobacteriales_bacterium_BRH_c54	-1.21267	0.0401464	Mulching/DeepPlowing_G_CM
Parcubacteria_group_bacterium_GW2011_GWA2_36_24	-1.2123	0.00493457	Mulching/DeepPlowing_N_CM
Paraburkholderia_sp._G-4-1-8	-1.21224	0.0314685	Mulching/DeepPlowing_N_CM
Haemophilus_influenzae	-1.21223	0.0208858	Mulching/DeepPlowing_G_CM
Stenotrophomonas_sp._SAU14A_NAIMI4_8	1.21194	0.0141917	Mulching/DeepPlowing_G_CM
Lysobacter_segetis	1.21153	0.0399835	Mulching/DeepPlowing_G_CM
Lachnospiraceae_bacterium_6_1_37FAA	-1.21143	0.00429977	Mulching/DeepPlowing_N_CM
Lysobacter_maris	1.21094	0.0314685	Mulching/DeepPlowing_G_CM
Acidiferrobacter_sp.	-1.21089	0.0106129	Mulching/DeepPlowing_G_CM
Microbacterium_sp._SAI-030	1.21083	0.0314685	Mulching/DeepPlowing_N_CM
Desertimonas_flava	-1.21017	0.0314685	Mulching/DeepPlowing_G_CM
Xanthomonadaceae_bacterium_NML93-0831	1.2101	0.0314685	Mulching/DeepPlowing_G_CM
Roseimaritima_sp._JC651	-1.20991	0.0314685	Mulching/DeepPlowing_N_CM
Bdellovibrio_sp._ZAP7	-1.20972	0.0496449	Mulching/DeepPlowing_N_CM
Yersinia_intermedia	-1.20962	0.00593046	Mulching/DeepPlowing_N_CM
Candidatus_Yanofskybacteria_bacterium_RIFCSPHIGHO2_01_FULL_48_25b	-1.20896	0.0354177	Mulching/DeepPlowing_G_CM
Candidatus_Daviesbacteria_bacterium_RIFCSPLOWO2_01_FULL_39_12	-1.20889	0.0379494	Mulching/DeepPlowing_G_CM
Ehrlichia_minasensis	-1.20794	0.014177	Mulching/DeepPlowing_N_CM
Planctomycetes_bacterium_Mal64	-1.20792	0.0314685	Mulching/DeepPlowing_G_CM
Sphingomonas_zeae	1.20748	0.00777458	Mulching/DeepPlowing_N_CM
Turicibacter_sanguinis	-1.20665	0.0139501	Mulching/DeepPlowing_G_CM
Flavimobilis_marinus	1.20628	0.037878	Mulching/DeepPlowing_G_CM
Halomonas_sp._HAL1	-1.20583	0.0401464	Mulching/DeepPlowing_N_CM
Stenotrophomonas_sp._SKA14	1.20548	0.0399835	Mulching/DeepPlowing_G_CM
Leifsonia_naganoensis	1.20516	0.000787319	Mulching/DeepPlowing_N_CM
Microbacterium_sp._8M	1.20502	0.0339769	Mulching/DeepPlowing_N_CM
Mameliella_sp.	-1.2045	0.0141917	Mulching/DeepPlowing_G_CM
Sphingobacteriales_bacterium_24-40-4	1.20426	0.00123406	Mulching/DeepPlowing_G_CM
Arthrobacter_sp._131MFCol6.1	1.20331	0.0421538	Mulching/DeepPlowing_G_CM
Omnitrophica_bacterium_RIFOXYB12_FULL_50_7	-1.20302	0.0210105	Mulching/DeepPlowing_N_CM
Streptomyces_pathocidini	1.20269	0.0322364	Mulching/DeepPlowing_N_CM
Gordonia_phage_Untouchable	1.20234	0.0159315	Mulching/DeepPlowing_G_CM
Marinobacter_vulgaris	-1.2023	0.0412001	Mulching/DeepPlowing_N_CM
Streptomyces_sp._NRRL_S-1868	1.20198	0.010286	Mulching/DeepPlowing_N_CM
Streptomyces_cyaneus	1.20119	0.00803887	Mulching/DeepPlowing_N_CM
Xanthomonas_sp._Mitacek01	1.20067	0.0314685	Mulching/DeepPlowing_G_CM
Sphingomonas_edaphi	1.20064	0.0187577	Mulching/DeepPlowing_G_CM
Lysobacter_sp._Root559	1.20027	0.0314685	Mulching/DeepPlowing_G_CM
Myxococcales_bacterium_FL481	-1.20015	0.0399835	Mulching/DeepPlowing_N_CM
Pseudarthrobacter_sp._NamE5	1.20008	0.0203451	Mulching/DeepPlowing_N_CM
Streptomyces_bicolor	1.19782	0.0271959	Mulching/DeepPlowing_N_CM
Luteimonas_arsenica	1.19692	0.0244344	Mulching/DeepPlowing_G_CM
Paraburkholderia_sp._BL17N1	-1.19691	0.036411	Mulching/DeepPlowing_N_CM
Armatimonadetes_bacterium_RBG_16_58_9	-1.19574	0.0496449	Mulching/DeepPlowing_N_CM
Metarhizium_majus	1.19573	0.036411	Mulching/DeepPlowing_N_CM
Lewinella_antarctica	-1.19544	0.0456763	Mulching/DeepPlowing_G_CM
Bacteroidetes_bacterium_CG23_combo_of_CG06-09_8_20_14_all_32_9	-1.19531	0.0139501	Mulching/DeepPlowing_G_CM
Cylindrospermopsis_raciborskii	-1.19486	0.0314685	Mulching/DeepPlowing_G_CM
Paenibacillus_contaminans	-1.19434	0.0299049	Mulching/DeepPlowing_G_CM
Sulfitobacter_sp._SK011	-1.19124	0.0335742	Mulching/DeepPlowing_G_CM
Brevundimonas_sp._GW460-12-10-14-LB2	-1.19029	0.0399835	Mulching/DeepPlowing_N_CM
Mesorhizobium_sp._B2-3-3	1.19009	0.00563554	Mulching/DeepPlowing_N_CM
Streptomyces_agglomeratus	1.18987	0.0141917	Mulching/DeepPlowing_N_CM
Verrucomicrobia_bacterium_61-8	-1.18906	0.0399835	Mulching/DeepPlowing_N_CM
Pseudomonas_sp._AU8050	-1.18852	0.0159315	Mulching/DeepPlowing_N_CM
Streptomyces_sp._YIM_130001	1.18752	0.01689	Mulching/DeepPlowing_N_CM
Chloroflexi_bacterium_ADurb.Bin325	-1.18729	0.0244344	Mulching/DeepPlowing_G_CM
Ignavibacteriales_bacterium_CG_4_9_14_3_um_filter_30_11	-1.18694	0.0468914	Mulching/DeepPlowing_G_CM
Microbacterium_sp._70-38	1.18662	0.00123406	Mulching/DeepPlowing_N_CM
Ignavibacterium_sp.	-1.18649	0.0117204	Mulching/DeepPlowing_G_CM
Clavibacter_michiganensis	1.18643	0.0399835	Mulching/DeepPlowing_N_CM
Rhizobium_sp._YR295	1.18621	0.0187577	Mulching/DeepPlowing_N_CM
Pseudomonas_sp._CMR12a	-1.18612	0.0018486	Mulching/DeepPlowing_N_CM
Conexibacter_sp._W3-3-2	-1.18611	0.00123406	Mulching/DeepPlowing_G_CM
Muricauda_sp._SM1704	-1.18476	0.0271959	Mulching/DeepPlowing_N_CM
Baekduia_soli	-1.18464	0.0187577	Mulching/DeepPlowing_G_CM
Marisediminicola_antarctica	1.18441	0.0244344	Mulching/DeepPlowing_N_CM
Nitrosomonas_halophila	-1.18425	0.0314685	Mulching/DeepPlowing_G_CM
Massilia_sp._BSC265	1.18405	0.0141917	Mulching/DeepPlowing_G_CM
Luteimonas_terricola	1.1838	0.0399835	Mulching/DeepPlowing_G_CM
Pseudoxanthomonas_sp._KAs_5_3	1.18358	0.00275607	Mulching/DeepPlowing_G_CM
Iamiaceae_bacterium_SCSIO_58843	-1.18353	0.0244344	Mulching/DeepPlowing_G_CM
Myxacorys_almedinensis	-1.18243	0.0106129	Mulching/DeepPlowing_N_CM
Bacteroidetes_bacterium_ADurb.Bin035	-1.18216	0.0338606	Mulching/DeepPlowing_N_CM
Sphingomonas_sp._AE3	1.18102	0.0314685	Mulching/DeepPlowing_G_CM
Aggregatibacter_aphrophilus	-1.18082	0.00966455	Mulching/DeepPlowing_N_CM
Chlorociboria_aeruginascens	1.18065	0.0430029	Mulching/DeepPlowing_N_CM
Gaiellales_bacterium	-1.17992	0.0141917	Mulching/DeepPlowing_G_CM
Sphingobacterium_alkalisoli	-1.17983	0.0314685	Mulching/DeepPlowing_G_CM
Rhodococcus_sp._C1-24	-1.17917	0.0399835	Mulching/DeepPlowing_G_CM
Leifsonia_rubra	1.1785	0.0106129	Mulching/DeepPlowing_N_CM
Methanothermobacter_sp.	-1.17849	0.0180195	Mulching/DeepPlowing_N_CM
Sphingomonas_jaspsi	1.17703	0.0244344	Mulching/DeepPlowing_G_CM
Hydrogenophaga_sp._70-12	1.17609	0.0314685	Mulching/DeepPlowing_N_CM
Stenotrophomonas_nitritireducens	1.17552	0.00399013	Mulching/DeepPlowing_G_CM
Candidatus_Dormibacter_sp._RRmetagenome_bin12	-1.17545	0.00777458	Mulching/DeepPlowing_G_CM
Fusobacterium_mortiferum	-1.1753	0.00966455	Mulching/DeepPlowing_N_CM
Stenomitos_frigidus	-1.17484	0.00777458	Mulching/DeepPlowing_N_CM
Rhodococcus_rhodochrous	-1.17389	0.0187577	Mulching/DeepPlowing_G_CM
Spirochaetes_bacterium_GWB1_66_5	-1.17315	0.0244344	Mulching/DeepPlowing_G_CM
Tenacibaculum_sp._SZ-18	-1.17193	0.0338606	Mulching/DeepPlowing_N_CM
Rickettsiales_bacterium_TMED131	-1.17179	0.0103673	Mulching/DeepPlowing_N_CM
Microbacterium_ketosireducens	1.17175	0.0421538	Mulching/DeepPlowing_N_CM
Flavihumibacter_sp._SB-02	-1.17164	0.0141917	Mulching/DeepPlowing_G_CM
Martelella_radicis	-1.17099	0.0183534	Mulching/DeepPlowing_G_CM
Parcubacteria_group_bacterium_LiPW_15	-1.17026	0.0129436	Mulching/DeepPlowing_N_CM
Ralstonia_phage_RSP15	-1.16999	0.00493457	Mulching/DeepPlowing_N_CM
Paracoccus_sp._BP8	-1.16927	0.0235696	Mulching/DeepPlowing_G_CM
Planctomycetes_bacterium_Poly41	-1.16902	0.0399835	Mulching/DeepPlowing_G_CM
Pedobacter_sp._AR-2-6	-1.16852	0.0271325	Mulching/DeepPlowing_G_CM
Brevundimonas_bacteroides	1.1674	0.00563554	Mulching/DeepPlowing_N_CM
Streptomyces_flavidovirens	1.16616	0.00275607	Mulching/DeepPlowing_N_CM
Rathayibacter_sp._AY1D9	-1.16547	0.0338606	Mulching/DeepPlowing_G_CM
Pseudomonas_formosensis	-1.16535	0.0308817	Mulching/DeepPlowing_G_CM
Paracoccus_sp._M683	-1.16524	0.045811	Mulching/DeepPlowing_G_CM
Cohnella_abietis	-1.16516	0.00102283	Mulching/DeepPlowing_N_CM
Sediminibacterium_sp._WSJ-3	-1.1647	0.00777458	Mulching/DeepPlowing_G_CM
Thioclava_sp._NG1	-1.16404	0.0420777	Mulching/DeepPlowing_G_CM
Sinirhodobacter_ferrireducens	-1.16299	0.0229511	Mulching/DeepPlowing_G_CM
Vibrio_metoecus	1.16259	0.00275607	Mulching/DeepPlowing_G_CM
Sphingobium_sp._15-1	1.16214	0.0244344	Mulching/DeepPlowing_G_CM
Fusarium_sporotrichioides	1.16123	0.0345474	Mulching/DeepPlowing_N_CM
Mycobacterium_phage_EniyanLRS	-1.16026	0.00133923	Mulching/DeepPlowing_N_CM
Leifsonia_sp._Leaf264	1.16005	0.037878	Mulching/DeepPlowing_N_CM
Candidatus_Nitrosocosmicus_oleophilus	1.15957	0.0314685	Mulching/DeepPlowing_N_CM
Nodularia_spumigena	-1.15942	0.000164541	Mulching/DeepPlowing_N_CM
Desulfatitalea_tepidiphila	-1.1588	0.00777458	Mulching/DeepPlowing_G_CM
Xanthomonas_sp._NCPPB_1128	1.15839	0.0399835	Mulching/DeepPlowing_G_CM
Alphaproteobacteria_bacterium_PA1	-1.15811	0.0106129	Mulching/DeepPlowing_G_CM
Byssochlamys_spectabilis	1.15773	0.0354177	Mulching/DeepPlowing_G_CM
Candidatus_Collierbacteria_bacterium_GW2011_GWB1_44_6	-1.15743	0.0445654	Mulching/DeepPlowing_G_CM
Mycolicibacterium_porcinum	-1.15736	0.0314685	Mulching/DeepPlowing_N_CM
Bdellovibrio_sp._ZAP7	-1.15731	0.00664093	Mulching/DeepPlowing_G_CM
Microbacterium_sp._LKL04	1.15726	0.0141917	Mulching/DeepPlowing_N_CM
Microbacterium_agarici	1.15693	0.0337003	Mulching/DeepPlowing_N_CM
Mycobacterium_asiaticum	-1.15465	0.00777458	Mulching/DeepPlowing_G_CM
Mycetocola_zhadangensis	1.15438	0.000164541	Mulching/DeepPlowing_N_CM
Escherichia_virus_ECOO78	-1.15432	0.00267396	Mulching/DeepPlowing_N_CM
Cellulomonas_aerilata	-1.15372	0.0141917	Mulching/DeepPlowing_G_CM
Acaryochloris_sp._CRU_2_0	-1.15231	0.00123406	Mulching/DeepPlowing_G_CM
Rhizobium_sp._CF258	1.1521	0.0421538	Mulching/DeepPlowing_N_CM
Arthrobacter_sp._8AJ	1.15126	0.0216164	Mulching/DeepPlowing_N_CM
Phaeobacter_sp._S60	-1.15054	0.0141917	Mulching/DeepPlowing_N_CM
Aeromonas_molluscorum	-1.14948	0.0445654	Mulching/DeepPlowing_G_CM
Brachybacterium_paraconglomeratum	-1.14933	0.014042	Mulching/DeepPlowing_G_CM
Microbacterium_sp._SYP-A9085	1.14851	0.015117	Mulching/DeepPlowing_N_CM
Yangia_sp._SAOS_153D	1.14844	0.0339769	Mulching/DeepPlowing_N_CM
Planctomycetes_bacterium_TMED75	-1.14825	0.0141917	Mulching/DeepPlowing_N_CM
Verrucomicrobium_spinosum	-1.14824	0.0244344	Mulching/DeepPlowing_N_CM
Candidatus_Nomurabacteria_bacterium_RIFCSPHIGHO2_01_FULL_40_20	-1.14787	0.0171513	Mulching/DeepPlowing_N_CM
Ulvibacter_sp._MAR_2010_11	-1.1478	0.0118053	Mulching/DeepPlowing_G_CM
Leifsonia_sp._OV430	1.14686	0.0399835	Mulching/DeepPlowing_N_CM
Ochrobactrum_haematophilum	-1.14649	0.0187577	Mulching/DeepPlowing_G_CM
Pseudoclavibacter_endophyticus	1.14612	0.0269581	Mulching/DeepPlowing_N_CM
Halobacteriovorax_sp._HLS	-1.14471	0.0314685	Mulching/DeepPlowing_N_CM
Malikia_spinosa	-1.14292	0.00563554	Mulching/DeepPlowing_N_CM
Pseudovibrio_sp._POLY-S9	-1.14266	0.0335742	Mulching/DeepPlowing_G_CM
Pseudomonas_sp._LD120	-1.1426	0.0338606	Mulching/DeepPlowing_N_CM
Rhodanobacter_sp._Soil772	1.14243	0.0399835	Mulching/DeepPlowing_G_CM
Planctomycetes_bacterium_Poly30	-1.14242	0.00777458	Mulching/DeepPlowing_G_CM
Kocuria_salsicia	1.1423	0.0468914	Mulching/DeepPlowing_G_CM
Methylobacterium_variabile	-1.14155	0.0399835	Mulching/DeepPlowing_N_CM
Corallococcus_sp._CA047B	-1.14154	0.00777458	Mulching/DeepPlowing_N_CM
Candidatus_Roizmanbacteria_bacterium_RIFCSPHIGHO2_02_FULL_39_9	-1.14135	0.0218189	Mulching/DeepPlowing_G_CM
Bradyrhizobium_pachyrhizi	-1.14135	0.0399835	Mulching/DeepPlowing_N_CM
Arthrobacter_sp._P2b	1.14129	0.0141917	Mulching/DeepPlowing_G_CM
Candidatus_Poseidoniales_archaeon	-1.14057	0.0244344	Mulching/DeepPlowing_N_CM
Gigaspora_rosea	-1.13924	0.0139501	Mulching/DeepPlowing_G_CM
Pseudomonas_sp._MPR-R2A3	-1.13845	0.0133708	Mulching/DeepPlowing_G_CM
Brevinematales_bacterium	-1.13784	0.01689	Mulching/DeepPlowing_G_CM
Lysinibacter_cavernae	1.13772	0.0468311	Mulching/DeepPlowing_N_CM
Rhizobium_sp._G21	-1.13763	0.0337003	Mulching/DeepPlowing_G_CM
Candidatus_Peregrinibacteria_bacterium_GW2011_GWC2_39_14	-1.13675	0.0331491	Mulching/DeepPlowing_N_CM
[Ruminococcus]_gnavus	-1.13571	0.0139501	Mulching/DeepPlowing_G_CM
Nocardia_cerradoensis	-1.13516	0.0304245	Mulching/DeepPlowing_N_CM
Parcubacteria_group_bacterium_GW2011_GWA2_47_7	-1.13512	0.0322364	Mulching/DeepPlowing_G_CM
Mesorhizobium_sp._B2-4-19	1.13494	0.0141917	Mulching/DeepPlowing_N_CM
Aquirufa_nivalisilvae	-1.13476	0.0187577	Mulching/DeepPlowing_N_CM
Patulibacter_medicamentivorans	-1.13459	0.00399013	Mulching/DeepPlowing_G_CM
Pseudonocardia_ammonioxydans	-1.13455	0.0106129	Mulching/DeepPlowing_G_CM
Bradyrhizobium_sp._OK095	-1.1341	0.00563554	Mulching/DeepPlowing_N_CM
Deinococcus_sp._D7000	-1.13384	0.0114161	Mulching/DeepPlowing_N_CM
Xanthomonas_melonis	1.13172	0.0314685	Mulching/DeepPlowing_G_CM
Mycobacterium_attenuatum	-1.13169	0.0468311	Mulching/DeepPlowing_N_CM
Streptomyces_spinoverrucosus	1.13145	0.0314685	Mulching/DeepPlowing_G_CM
Paenibacillus_pinihumi	-1.13116	0.0171513	Mulching/DeepPlowing_G_CM
Aureimonas_ureilytica	-1.13036	0.0399835	Mulching/DeepPlowing_G_CM
Ramlibacter_sp._B156	1.12984	0.0187577	Mulching/DeepPlowing_G_CM
Candidatus_Nomurabacteria_bacterium_RIFCSPLOWO2_01_FULL_41_52b	-1.12895	0.00122103	Mulching/DeepPlowing_N_CM
Barrevirus_sp.	-1.1273	0.00241539	Mulching/DeepPlowing_N_CM
Agromyces_allii	1.12709	0.0339769	Mulching/DeepPlowing_N_CM
Granulicella_sp._S190	1.12678	0.00185109	Mulching/DeepPlowing_N_CM
Ignavibacteriales_bacterium_UTCHB3	-1.12571	0.0129436	Mulching/DeepPlowing_N_CM
Prosthecobacter_debontii	-1.12543	0.0244344	Mulching/DeepPlowing_N_CM
Syntrophus_sp._PtaB.Bin138	-1.12454	0.00123406	Mulching/DeepPlowing_G_CM
Acidobacteria_bacterium_21-70-11	-1.1227	0.0399835	Mulching/DeepPlowing_G_CM
Hypsizygus_marmoreus	-1.12258	0.0338606	Mulching/DeepPlowing_N_CM
Lysobacter_sp._Root604	1.12169	0.0187577	Mulching/DeepPlowing_G_CM
Stenotrophomonas_sp._BK441	1.12146	0.0187577	Mulching/DeepPlowing_G_CM
Moorea_sp._SIO3C2	-1.12124	0.00803887	Mulching/DeepPlowing_G_CM
Candidatus_Berkelbacteria_bacterium_RIFOXYA2_FULL_43_10	-1.12107	0.0271325	Mulching/DeepPlowing_N_CM
Mesorhizobium_sp._YM1C-6-2	1.12107	0.0141917	Mulching/DeepPlowing_N_CM
Nocardia_pseudovaccinii	1.12023	0.0339769	Mulching/DeepPlowing_N_CM
Luteimonas_sp._MC1782	1.11877	0.0314685	Mulching/DeepPlowing_G_CM
Candidatus_Roizmanbacteria_bacterium_CG_4_10_14_0_2_um_filter_36_9	-1.1181	0.0208858	Mulching/DeepPlowing_G_CM
Actinobacteria_bacterium_RBG_19FT_COMBO_70_19	1.11766	0.00563554	Mulching/DeepPlowing_N_CM
uncultured_delta_proteobacterium	-1.11745	0.0244344	Mulching/DeepPlowing_N_CM
Alkaliphilus_peptidifermentans	-1.11605	0.0354177	Mulching/DeepPlowing_G_CM
Alteromonas_sp._KUL156	-1.11571	0.0371401	Mulching/DeepPlowing_N_CM
Deltaproteobacteria_bacterium_CG2_30_63_29	-1.11567	0.0399835	Mulching/DeepPlowing_N_CM
Microbacterium_invictum	1.11546	0.0187577	Mulching/DeepPlowing_N_CM
Planctomycetes_bacterium_K22_7	-1.1148	0.0314685	Mulching/DeepPlowing_G_CM
Hydrogenophaga_sp._SCN_70-13	1.11453	0.0141917	Mulching/DeepPlowing_N_CM
Salinisphaera_hydrothermalis	-1.11418	0.0141917	Mulching/DeepPlowing_N_CM
Desulfatitalea_tepidiphila	-1.11369	0.00777458	Mulching/DeepPlowing_N_CM
Candidatus_Lloydbacteria_bacterium_RIFCSPLOWO2_02_FULL_54_12	-1.11186	0.0496449	Mulching/DeepPlowing_N_CM
Meiothermus_phage_MMP17	-1.11179	0.0139501	Mulching/DeepPlowing_N_CM
Pseudophaeobacter_arcticus	-1.11154	0.0026661	Mulching/DeepPlowing_N_CM
Microbacterium_pygmaeum	1.11136	0.0314685	Mulching/DeepPlowing_N_CM
Bordetella_virus_CN2	-1.11135	0.047584	Mulching/DeepPlowing_G_CM
Xanthomonadaceae_bacterium_2PB	1.11129	0.0399835	Mulching/DeepPlowing_G_CM
Polynucleobacter_aenigmaticus	-1.11082	0.0108604	Mulching/DeepPlowing_N_CM
Cryobacterium_sp._MDB2-B	-1.10944	0.0296561	Mulching/DeepPlowing_G_CM
Lysinimonas_sp._SLBN-160	1.10905	0.0141917	Mulching/DeepPlowing_N_CM
Leifsonia_sp._Leaf325	1.10871	0.0244344	Mulching/DeepPlowing_N_CM
Arthrobacter_sp._SLBN-112	1.10863	0.00469675	Mulching/DeepPlowing_N_CM
Streptomyces_sp._3212.4	1.10843	0.0421538	Mulching/DeepPlowing_N_CM
Cellulomonas_sp._Root930	-1.10737	0.0399835	Mulching/DeepPlowing_G_CM
Agromyces_terreus	1.10679	0.0314685	Mulching/DeepPlowing_N_CM
Alcanivoracaceae_bacterium	-1.10619	0.0114161	Mulching/DeepPlowing_N_CM
Microgenomates_group_bacterium_GW2011_GWA1_48_10	-1.10583	0.0257014	Mulching/DeepPlowing_N_CM
Planctomycetes_bacterium_ETA_A8	-1.10578	0.0314685	Mulching/DeepPlowing_G_CM
Chloroflexi_bacterium_13_1_40CM_68_15	1.10563	0.00355146	Mulching/DeepPlowing_N_CM
Natrialbaceae_archaeon_XQ-INN_246	-1.10556	0.0314685	Mulching/DeepPlowing_G_CM
Halomonas_lactosivorans	1.10539	0.000493624	Mulching/DeepPlowing_N_CM
Arthrobacter_virus_Sonali	1.1043	0.0369884	Mulching/DeepPlowing_G_CM
Streptomyces_rhizosphaericus	1.10353	0.0141917	Mulching/DeepPlowing_N_CM
Rhodanobacter_sp._SCN_67-45	1.10343	0.0244344	Mulching/DeepPlowing_G_CM
uncultured_bacterium_lac146	-1.103	0.0322364	Mulching/DeepPlowing_G_CM
Hydrogenophaga_borbori	1.10254	0.0314685	Mulching/DeepPlowing_N_CM
Boseongicola_sp._SB0675_bin_26	-1.10228	0.0337003	Mulching/DeepPlowing_G_CM
Streptomyces_sp._PSKA01	1.10175	0.0244344	Mulching/DeepPlowing_N_CM
Streptomyces_sp._SFB5A	1.10118	0.0104046	Mulching/DeepPlowing_G_CM
Blastococcus_sp._DSM_44205	1.10052	0.00966455	Mulching/DeepPlowing_N_CM
Candidatus_Kerfeldbacteria_bacterium_CG08_land_8_20_14_0_20_40_16	-1.10044	0.0208858	Mulching/DeepPlowing_G_CM
Geminisphaera_colitermitum	-1.09959	0.0187577	Mulching/DeepPlowing_G_CM
Patulibacter_minatonensis	-1.09954	0.00563554	Mulching/DeepPlowing_G_CM
Luteimonas_aestuarii	1.09945	0.0399835	Mulching/DeepPlowing_G_CM
Candidatus_Moranbacteria_bacterium_GW2011_GWE1_36_7	-1.09873	0.0139501	Mulching/DeepPlowing_G_CM
Herbiconiux_flava	1.0985	0.0418353	Mulching/DeepPlowing_N_CM
Luteimonas_sp._YGD11-2	1.09812	0.0187577	Mulching/DeepPlowing_G_CM
Frondihabitans_sp._PhB161	1.09785	0.00563554	Mulching/DeepPlowing_N_CM
Litoreibacter_ponti	-1.0978	0.0420777	Mulching/DeepPlowing_G_CM
Parcubacteria_group_bacterium_GW2011_GWA2_36_24	-1.09679	0.0338606	Mulching/DeepPlowing_G_CM
Cyclobacterium_amurskyense	1.09652	0.00399013	Mulching/DeepPlowing_G_CM
Deinococcus_pimensis	-1.09629	0.0399835	Mulching/DeepPlowing_G_CM
Microbacterium_sp._2FI	1.09617	0.0244344	Mulching/DeepPlowing_N_CM
Cobetia_marina	-1.09557	0.045811	Mulching/DeepPlowing_N_CM
Serinicoccus_marinus	-1.09482	0.00222813	Mulching/DeepPlowing_N_CM
Undibacterium_sp._CY21W	-1.09418	0.00563554	Mulching/DeepPlowing_N_CM
Pseudonocardiaceae_bacterium_YIM_PH_21723	-1.09381	0.0314685	Mulching/DeepPlowing_N_CM
Myxococcus_sp._CA051A	-1.09367	0.0314685	Mulching/DeepPlowing_G_CM
Eubacterium_sp._An3	-1.09293	0.0183534	Mulching/DeepPlowing_N_CM
Lutibacter_flavus	-1.09183	0.01689	Mulching/DeepPlowing_N_CM
Gimesia_maris	-1.09089	0.0468311	Mulching/DeepPlowing_N_CM
Cyanobacteria_bacterium_SW_4_48_29	-1.09085	0.0139501	Mulching/DeepPlowing_G_CM
Ignavibacteria_bacterium_CG_4_9_14_3_um_filter_36_18	-1.0907	0.00743216	Mulching/DeepPlowing_G_CM
uncultured_Acidobacteria_bacterium_A11	1.08915	0.0314685	Mulching/DeepPlowing_N_CM
Streptomyces_corchorusii	1.08854	0.0478485	Mulching/DeepPlowing_N_CM
Tetrasphaera_virus_TJE1	-1.0876	0.0468914	Mulching/DeepPlowing_N_CM
Chryseobacterium_carnipullorum	-1.08748	0.0236102	Mulching/DeepPlowing_N_CM
Laceyella_sacchari	-1.08715	0.027555	Mulching/DeepPlowing_N_CM
uncultured_Xanthomonadaceae_bacterium	1.08657	0.0106129	Mulching/DeepPlowing_G_CM
Rubripirellula_tenax	-1.0865	0.00399013	Mulching/DeepPlowing_N_CM
Leptolyngbya_sp._hensonii	-1.08644	0.0244344	Mulching/DeepPlowing_G_CM
Flammeovirga_aprica	-1.08622	0.0418353	Mulching/DeepPlowing_N_CM
Sanguibacter_inulinus	-1.08603	0.0314685	Mulching/DeepPlowing_N_CM
Lachnospiraceae_bacterium_WCA-693-APC-MOT-I	-1.0856	0.0385787	Mulching/DeepPlowing_N_CM
Luteimonas_lumbrici	1.08467	0.0399835	Mulching/DeepPlowing_G_CM
Streptomyces_sp._SID8374	1.08458	0.0053165	Mulching/DeepPlowing_N_CM
Pseudomonas_virus_Ab18	-1.08436	0.0203451	Mulching/DeepPlowing_N_CM
Streptomyces_purpureus	1.08434	0.0106129	Mulching/DeepPlowing_N_CM
Streptomyces_sp._NRRL_S-646	1.08425	0.0214137	Mulching/DeepPlowing_N_CM
Frateuria_sp.	1.08418	0.0314685	Mulching/DeepPlowing_G_CM
Mesorhizobium_sp._B1-1-5	1.08416	0.00803887	Mulching/DeepPlowing_N_CM
Pseudomonas_sp._NZIPFR-PS5	-1.08382	0.00567379	Mulching/DeepPlowing_N_CM
Streptomyces_sp._F001	1.08374	0.0314685	Mulching/DeepPlowing_N_CM
Microcella_putealis	1.08346	0.0314685	Mulching/DeepPlowing_N_CM
Flavobacterium_gillisiae	-1.0833	0.0271959	Mulching/DeepPlowing_N_CM
Chlorobiaceae_bacterium	-1.08319	0.0314685	Mulching/DeepPlowing_G_CM
Halobacteriovorax_sp._JY17	-1.08284	0.0399835	Mulching/DeepPlowing_N_CM
Lysobacter_sp._SG-8	1.0823	0.0314685	Mulching/DeepPlowing_G_CM
Solemya_elarraichensis_gill_symbiont	-1.08209	0.0141917	Mulching/DeepPlowing_G_CM
Streptomyces_sp._QHH-9511	1.08198	0.0165499	Mulching/DeepPlowing_N_CM
Crenarchaeota_archaeon_13_1_20CM_2_51_8	1.08169	0.00608743	Mulching/DeepPlowing_N_CM
Draconibacterium_sediminis	-1.08132	0.036411	Mulching/DeepPlowing_G_CM
Sporomusa_sphaeroides	-1.08098	0.00567379	Mulching/DeepPlowing_N_CM
Candidatus_Altiarchaeales_archaeon_WOR_SM1_79	-1.08074	0.0399835	Mulching/DeepPlowing_N_CM
Bosea_sp._12-68-7	-1.08073	0.0106129	Mulching/DeepPlowing_G_CM
Pusillimonas_maritima	-1.08038	0.0399835	Mulching/DeepPlowing_G_CM
Pithovirus_LCPAC201	-1.07833	0.00909928	Mulching/DeepPlowing_N_CM
Sulfitobacter_sp._20_GPM-1509m	-1.07754	0.0271959	Mulching/DeepPlowing_N_CM
Leucobacter_sp._4J7B1	1.07745	0.00040946	Mulching/DeepPlowing_N_CM
Moorea_sp._SIO3I6	-1.07737	0.0236102	Mulching/DeepPlowing_N_CM
Microbacterium_azadirachtae	1.07723	0.00275607	Mulching/DeepPlowing_N_CM
Candidatus_Dependentiae_bacterium_(ex_Spumella_elongata_CCAP_955/1)	-1.07687	0.0430029	Mulching/DeepPlowing_N_CM
Verrucomicrobium_spinosum	-1.07674	0.0314685	Mulching/DeepPlowing_G_CM
Tolypothrix_campylonemoides	1.07472	0.0399835	Mulching/DeepPlowing_G_CM
Burkholderia_sp._BDU8	-1.07401	0.0244344	Mulching/DeepPlowing_N_CM
Polaromonas_sp._39-63-203	-1.07309	0.0187577	Mulching/DeepPlowing_N_CM
Xanthomonadaceae_bacterium_NML91-0268	1.07211	0.0141917	Mulching/DeepPlowing_G_CM
Streptomyces_sp._61	-1.07115	0.0192211	Mulching/DeepPlowing_N_CM
Atlantibacter_sp._RC6	1.07108	0.0478485	Mulching/DeepPlowing_G_CM
Crenothrix_polyspora	-1.07023	0.0399835	Mulching/DeepPlowing_G_CM
Nocardioides_sp._X2025	-1.06874	0.0399835	Mulching/DeepPlowing_G_CM
Alpinimonas_psychrophila	-1.06873	0.036411	Mulching/DeepPlowing_G_CM
Leptolyngbya_boryana	-1.06859	0.0399835	Mulching/DeepPlowing_N_CM
Acidobacteriia_bacterium_12-62-4	-1.06818	0.0399835	Mulching/DeepPlowing_G_CM
Hapalosiphonaceae_cyanobacterium_JJU2	-1.06805	0.0418353	Mulching/DeepPlowing_G_CM
Arthrobacter_sp._B1805	1.0668	0.0338606	Mulching/DeepPlowing_N_CM
Candidatus_Kaiserbacteria_bacterium_RIFCSPLOWO2_02_FULL_59_19	-1.06668	0.0193625	Mulching/DeepPlowing_G_CM
Paenibacillus_glucanolyticus	-1.06619	0.0120418	Mulching/DeepPlowing_N_CM
Aquitalea_sp._MWU14-2217	-1.06601	0.0300267	Mulching/DeepPlowing_N_CM
Niastella_sp._SCN_39-18	-1.06472	0.0371401	Mulching/DeepPlowing_G_CM
Hymenobacter_gummosus	-1.06404	0.0314685	Mulching/DeepPlowing_N_CM
Micromonospora_sp._KC207	1.06306	0.0314685	Mulching/DeepPlowing_N_CM
Cohnella_xylanilytica	-1.06258	0.0244344	Mulching/DeepPlowing_G_CM
Xanthomonadaceae_bacterium_CU05-9	1.06239	0.0314685	Mulching/DeepPlowing_G_CM
Bdellovibrio_sp._KM01	-1.06234	0.00774841	Mulching/DeepPlowing_N_CM
Streptomyces_sp._SID12501	1.06198	0.0314685	Mulching/DeepPlowing_N_CM
Caenimonas_sp._HX-9-20	1.06179	0.0314685	Mulching/DeepPlowing_N_CM
Capnocytophaga_sputigena	-1.06125	0.0338606	Mulching/DeepPlowing_N_CM
Bacteroides_phage_crAss001	-1.06048	0.0338606	Mulching/DeepPlowing_G_CM
Bordetella_virus_MW2	-1.06045	0.0445654	Mulching/DeepPlowing_N_CM
Candidatus_Nomurabacteria_bacterium_RIFCSPLOWO2_01_FULL_37_49	-1.06015	0.0338606	Mulching/DeepPlowing_N_CM
Periconia_macrospinosa	1.05984	0.00777458	Mulching/DeepPlowing_N_CM
Frankia_inefficax	-1.0597	0.0187577	Mulching/DeepPlowing_G_CM
Chlorobiales_bacterium	-1.05925	0.0399835	Mulching/DeepPlowing_G_CM
Leptospira_sp.	-1.05832	0.00463274	Mulching/DeepPlowing_N_CM
Streptomyces_sp._WAC06614	1.05818	0.00040946	Mulching/DeepPlowing_N_CM
Nannocystis_exedens	-1.05772	0.0314685	Mulching/DeepPlowing_N_CM
Pusillimonas_sp._7-48	-1.057	0.0264844	Mulching/DeepPlowing_G_CM
Sphingomonas_sp._HDW15A	1.05632	0.00777458	Mulching/DeepPlowing_G_CM
Pelotomaculum_sp._PtaB.Bin117	-1.05623	0.00825594	Mulching/DeepPlowing_N_CM
Pseudoxanthomonas_gei	1.0562	0.0399835	Mulching/DeepPlowing_G_CM
Chryseobacterium_taichungense	-1.05232	0.00429977	Mulching/DeepPlowing_N_CM
Geobacter_soli	-1.05207	0.0141917	Mulching/DeepPlowing_N_CM
Odoribacter_splanchnicus	-1.05192	0.0187577	Mulching/DeepPlowing_N_CM
Candidatus_Uhrbacteria_bacterium_CG10_big_fil_rev_8_21_14_0_10_50_16	-1.05164	0.0139501	Mulching/DeepPlowing_G_CM
Agromyces_sp._MF845	1.05088	0.00616675	Mulching/DeepPlowing_N_CM
Lysobacter_sp._N42	1.05008	0.0314685	Mulching/DeepPlowing_G_CM
Micromonospora_parathelypteridis	1.04953	0.00469675	Mulching/DeepPlowing_N_CM
Caballeronia_terrestris	1.04773	0.0106129	Mulching/DeepPlowing_N_CM
Streptomyces_sp._DASNCL29	1.04764	0.036411	Mulching/DeepPlowing_N_CM
Dechloromonas_agitata	-1.04718	0.00777458	Mulching/DeepPlowing_G_CM
Caulobacter_phage_Ccr5	-1.04676	0.0420777	Mulching/DeepPlowing_N_CM
Herbiconiux_sp._VKM_Ac-2851	1.04626	0.0244344	Mulching/DeepPlowing_N_CM
Mycobacterium_phage_Myrna	-1.04587	0.0322364	Mulching/DeepPlowing_N_CM
Sphingobium_sp._YR657	1.04581	0.00777458	Mulching/DeepPlowing_N_CM
Enterobacter_cloacae_complex_sp._GF14B	-1.04393	0.0018486	Mulching/DeepPlowing_N_CM
Methylomonas_sp._Kb3	-1.04321	0.0187577	Mulching/DeepPlowing_N_CM
Curtobacterium_sp._8I-2	1.04206	0.00198698	Mulching/DeepPlowing_N_CM
Zymomonas_sp.	-1.04205	0.0244344	Mulching/DeepPlowing_N_CM
Labedella_endophytica	1.04156	0.0421538	Mulching/DeepPlowing_N_CM
Sanguibacter_inulinus	-1.04112	0.0308817	Mulching/DeepPlowing_G_CM
Pseudomonas_sagittaria	-1.04076	0.0141917	Mulching/DeepPlowing_N_CM
Cellulomonas_sp._Root137	-1.03954	0.00185109	Mulching/DeepPlowing_G_CM
Flavobacterium_cupreum	-1.03918	0.0146492	Mulching/DeepPlowing_N_CM
Mesorhizobium_sp._B2-7-1	1.03912	0.0216164	Mulching/DeepPlowing_N_CM
Streptomyces_hyaluromycini	1.039	0.0244344	Mulching/DeepPlowing_G_CM
Microbacterium_kyungheense	1.03885	0.00195507	Mulching/DeepPlowing_N_CM
Pseudomonas_virus_PaMx28	-1.03843	0.0338606	Mulching/DeepPlowing_N_CM
Methyloglobulus_morosus	-1.03743	0.0399835	Mulching/DeepPlowing_G_CM
Candidatus_Protochlamydia_amoebophila	-1.03672	0.0337003	Mulching/DeepPlowing_N_CM
Syntrophobacterales_bacterium_CG03_land_8_20_14_0_80_58_14	1.03659	0.0187577	Mulching/DeepPlowing_N_CM
Nocardia_sp._CNY236	-1.03597	0.00704718	Mulching/DeepPlowing_N_CM
Parcubacteria_group_bacterium_Gr01-1014_44	-1.03573	0.0338606	Mulching/DeepPlowing_G_CM
Belnapia_sp._F-4-1	1.03567	0.0141917	Mulching/DeepPlowing_N_CM
Microbacterium_sp._HSID17254	-1.03435	0.045811	Mulching/DeepPlowing_G_CM
Mycobacterium_gordonae	-1.03383	0.00185109	Mulching/DeepPlowing_G_CM
Streptomyces_sp._Ru87	1.03347	0.00803887	Mulching/DeepPlowing_N_CM
Rhodocyclaceae_bacterium_UTPRO2	-1.03296	0.0399835	Mulching/DeepPlowing_G_CM
Youngiibacter_fragilis	-1.03218	0.00966455	Mulching/DeepPlowing_G_CM
Pseudomonas_daroniae	1.03186	0.00275607	Mulching/DeepPlowing_N_CM
Luteimonas_granuli	1.03154	0.0399835	Mulching/DeepPlowing_G_CM
Parcubacteria_group_bacterium_RIFOXYD2_FULL_52_8	-1.03152	0.00493457	Mulching/DeepPlowing_N_CM
Candidatus_Nitrosocosmicus_arcticus	1.03151	0.0141917	Mulching/DeepPlowing_N_CM
delta_proteobacterium_NaphS2	-1.03074	0.0170611	Mulching/DeepPlowing_G_CM
Nocardia_sp._NRRL_S-836	-1.03017	0.0187577	Mulching/DeepPlowing_N_CM
Alkalihalobacillus_pseudalcaliphilus	-1.02981	0.0183534	Mulching/DeepPlowing_N_CM
Oceanobacillus_sp._CFH_90083	1.02953	0.0337003	Mulching/DeepPlowing_N_CM
Stenotrophomonas_sp._MB339	1.02925	0.0338606	Mulching/DeepPlowing_N_CM
Pseudoalteromonas_sp._SW0106-04	1.02897	0.0296561	Mulching/DeepPlowing_N_CM
Deinococcus_sp._HMF7620	-1.0288	0.0456763	Mulching/DeepPlowing_G_CM
Arthrobacter_sp._9MFCol3.1	1.02818	0.0187577	Mulching/DeepPlowing_N_CM
Crenothrix_polyspora	-1.02752	0.0399835	Mulching/DeepPlowing_N_CM
Pseudanabaena_sp._UWO311	-1.0257	0.014042	Mulching/DeepPlowing_G_CM
Chromatiaceae_bacterium_No.7	-1.02562	0.0304245	Mulching/DeepPlowing_N_CM
Desulfitobacterium_chlororespirans	-1.02494	0.0300267	Mulching/DeepPlowing_G_CM
Rhodococcus_aetherivorans	-1.02413	0.00275607	Mulching/DeepPlowing_G_CM
Paenibacillus_thalictri	1.02201	0.0244344	Mulching/DeepPlowing_N_CM
Paenarthrobacter_aurescens	1.02132	0.045811	Mulching/DeepPlowing_G_CM
Sphingobacteriales_bacterium_39-40-5	1.02131	0.0244344	Mulching/DeepPlowing_G_CM
Methylophilaceae_bacterium	-1.02053	0.0141917	Mulching/DeepPlowing_N_CM
Frankia_sp._BMG5.30	-1.02038	0.00563554	Mulching/DeepPlowing_G_CM
Pseudomonas_sp._DG56-2	-1.01945	0.00189222	Mulching/DeepPlowing_N_CM
Conexibacter_sp._Seoho-28	-1.01906	0.000287947	Mulching/DeepPlowing_G_CM
Agrococcus_casei	1.01852	0.045356	Mulching/DeepPlowing_N_CM
Gordonia_phage_Jodelie19	-1.01824	0.0314685	Mulching/DeepPlowing_N_CM
Frankiales_bacterium	-1.01695	0.0187577	Mulching/DeepPlowing_G_CM
Tsukamurella_tyrosinosolvens	-1.01677	0.0118053	Mulching/DeepPlowing_N_CM
Euzebya_sp._DY32-46	-1.01643	0.0244344	Mulching/DeepPlowing_G_CM
Sphingomonas_sp._SYSUP0001	1.01597	0.00777458	Mulching/DeepPlowing_G_CM
Parasphingopyxis_sp._CP4	1.01588	0.000787319	Mulching/DeepPlowing_N_CM
Arthrobacter_phage_Sporto	-1.01439	0.0290153	Mulching/DeepPlowing_N_CM
Halomonas_arcis	-1.01401	0.0300267	Mulching/DeepPlowing_G_CM
Euhalothece_sp._KZN_001	-1.01352	0.0183534	Mulching/DeepPlowing_G_CM
Pseudonocardia_kunmingensis	-1.01346	0.0399835	Mulching/DeepPlowing_G_CM
Arenimonas_sp._3729k	1.01331	0.0244344	Mulching/DeepPlowing_G_CM
Rhodoplanes_piscinae	-1.01205	0.0399835	Mulching/DeepPlowing_G_CM
Deinococcus_cellulosilyticus	-1.01202	0.00275607	Mulching/DeepPlowing_G_CM
Vibrio_jasicida	-1.01194	0.0331491	Mulching/DeepPlowing_N_CM
Chloroflexi_bacterium_13_1_40CM_4_69_19	1.01151	0.0399835	Mulching/DeepPlowing_N_CM
Gordonia_sp._YC-JH1	-1.01085	0.0338606	Mulching/DeepPlowing_G_CM
Mesorhizobium_sp._B2-6-2	1.01073	0.0244344	Mulching/DeepPlowing_N_CM
Kordiimonadales_bacterium_JCM_17846	1.01057	0.0339769	Mulching/DeepPlowing_N_CM
Muribaculaceae_bacterium_M3	-1.0105	0.0227205	Mulching/DeepPlowing_N_CM
Elusimicrobiales_bacterium	-1.01049	0.00185132	Mulching/DeepPlowing_N_CM
Phytoactinopolyspora_alkaliphila	1.00961	0.0399835	Mulching/DeepPlowing_N_CM
Geitlerinema_sp._PCC_7407	1.00894	0.00777458	Mulching/DeepPlowing_N_CM
Dickeya_zeae	-1.0057	0.0296561	Mulching/DeepPlowing_N_CM
Hyphomonas_sp._GM-8P	1.00562	0.000493624	Mulching/DeepPlowing_N_CM
Candidatus_Peregrinibacteria_bacterium_Greene0416_19	-1.00558	0.0244344	Mulching/DeepPlowing_N_CM
Pseudomonas_floridensis	-1.00546	0.00429977	Mulching/DeepPlowing_N_CM
Microbacterium_hatanonis	1.00537	0.00777458	Mulching/DeepPlowing_N_CM
Streptomyces_phage_RavenPuff	1.00446	0.00635079	Mulching/DeepPlowing_N_CM
Streptomyces_rectiverticillatus	-1.00408	0.0314685	Mulching/DeepPlowing_G_CM
Paracoccus_denitrificans	-1.00368	0.0244344	Mulching/DeepPlowing_G_CM
Mesorhizobium_sp._AP09	1.00292	0.00123406	Mulching/DeepPlowing_N_CM
Candidatus_Roizmanbacteria_bacterium_CG_4_9_14_0_2_um_filter_39_13	-1.00253	0.00268206	Mulching/DeepPlowing_N_CM
Myxococcales_bacterium_13_1_40CM_2_68_15	-1.00195	0.0296561	Mulching/DeepPlowing_G_CM
Citrobacter_youngae	-1.00166	0.0354177	Mulching/DeepPlowing_G_CM
Thalassobius_sp._I31.1	-1.00165	0.0235696	Mulching/DeepPlowing_G_CM
Actinobacteria_bacterium_CG_4_9_14_3_um_filter_50_75	-1.00125	0.00105693	Mulching/DeepPlowing_G_CM

## Sheet: species_NG
Species	log2FoldChange	pValue	Group
Flavobacterium_akiainvivens	4.55783	0.0150647	N/G
Pseudomonas_sp._HMWF031	-3.3695	0.0458981	CMN/G
Sphingomonadales_bacterium_39-57-19	-3.20731	0.0106301	CMN/G
Hyphomonadaceae_bacterium_UKL13-1	-3.18103	0.0157489	CMN/G
Roseovarius_sp._MCTG156(2b)	-3.14276	0.00332595	CMN/G
Alteromonas_sp._I10	-2.98051	0.0193925	CMN/G
Flavobacterium_sp._CJ74	2.86515	0.0379851	N/G
Porphyrobacter_tepidarius	-2.42368	0.0170782	CMN/G
Alteromonas_sp._I10	-2.27051	0.0418979	N/G
Rhodobacteraceae_bacterium_HSP-20	-2.23693	0.0187059	CMN/G
Proteobacteria_bacterium_228	-2.20925	0.0371502	N/G
Rheinheimera_sp._YQF-2	-2.20543	0.0253805	CMN/G
Sphingomonadaceae_bacterium_PASS1	-2.163	0.0170782	CMN/G
Sphingorhabdus_rigui	-2.13723	0.0289585	CMN/G
Porphyrobacter_sp._IPPAS_B-1204	-2.07993	0.0187059	CMN/G
Cellvibrio_sp._pealriver	-2.04872	0.0435428	2AN/G
Cellvibrio_sp._KY-YJ-3	-2.01177	0.0265981	2AN/G
Thaumarchaeota_archaeon	2.00177	0.0078738	CMN/G
Porphyrobacter_sp._SLTP	-1.97896	0.0128993	CMN/G
Erythromicrobium_ramosum	-1.9625	0.0402226	CMN/G
Cellvibrio_sp._BR	-1.95469	0.0128993	2AN/G
Oleiphilus_sp._HI0130	-1.95066	0.0428933	CMN/G
Thiomicrorhabdus_sp._AkT22	-1.94637	0.00914915	CMN/G
Rheinheimera_sp._YQF-2	-1.93453	0.00697091	N/G
Halomonas_sp.	-1.91825	0.0265981	CMN/G
Candidatus_Nitrosocosmicus_oleophilus	1.91815	0.00416163	CMN/G
Kamptonema_sp._SIO4C4	-1.91131	0.0248541	CMN/G
Candidatus_Nitrosocosmicus_franklandus	1.90992	0.00332595	CMN/G
Gilvimarinus_chinensis	-1.90262	0.0212694	N/G
Thalassotalea_euphylliae	-1.89879	0.0256748	CMN/G
Microbulbifer_pacificus	-1.87595	0.0496628	2AN/G
Nitrosopumilales_archaeon	1.85696	0.00963088	CMN/G
Agarilytica_rhodophyticola	-1.84034	0.0393197	N/G
uncultured_crenarchaeote_57a5	1.83309	0.0154789	CMN/G
Thalassocella_blandensis	-1.83176	0.014588	N/G
Phycomyces_blakesleeanus	-1.82761	0.019889	CMN/G
Paraglaciecola_sp._L3A3	-1.8276	0.0239094	CMN/G
Porphyrobacter_sp._HT-58-2	-1.82594	0.0128993	CMN/G
Endogone_sp._FLAS-F59071	-1.80931	0.00826245	CMN/G
uncultured_crenarchaeote	1.79769	0.0117175	CMN/G
Nitrososphaera_sp._AFS	1.79128	0.00510715	CMN/G
Saccharospirillaceae_bacterium	-1.78934	0.00358418	N/G
uncultured_crenarchaeote_76h13	1.76057	0.0108631	CMN/G
Gilvimarinus_chinensis	-1.74551	0.0470848	CMN/G
Thaumarchaeota_archaeon_13_1_40CM_2_39_4	1.74462	0.00440423	CMN/G
Hydrocarboniclastica_marina	-1.7383	0.0170782	CMN/G
Saccharospirillaceae_bacterium	-1.7373	0.0200406	CMN/G
Gilvimarinus_agarilyticus	-1.73598	0.04273	N/G
Gilvimarinus_polysaccharolyticus	-1.73118	0.0253791	N/G
Okeania_sp._SIO1I7	-1.71627	0.0443947	CMN/G
Flavobacterium_album	1.71626	0.0410207	2AN/G
Spongiibacter_sp.	-1.70119	0.0404302	N/G
Halomonas_halocynthiae	-1.69931	0.0399479	CMN/G
Nitrososphaerales_archaeon	1.68504	0.0117175	CMN/G
Rheinheimera_tuosuensis	-1.6839	0.0319018	N/G
Paraglaciecola_sp._L3A3	-1.6736	0.0351755	N/G
Moraxellaceae_bacterium	-1.66633	0.0371753	N/G
Aestuariicella_hydrocarbonica	-1.66331	0.0101498	N/G
Halomonas_sp.	-1.66187	0.0128097	N/G
Marinimicrobium_koreense	-1.66104	0.0305891	N/G
Cellvibrio_sp._PSBB023	-1.65966	0.016059	N/G
Candidatus_Nitrosocosmicus_sp.	1.65871	0.00619187	CMN/G
Pseudomonas_zhaodongensis	-1.65701	0.0227191	CMN/G
Cellvibrio_sp._pealriver	-1.65093	0.0105713	N/G
Chloroflexi_bacterium_13_1_40CM_67_9	1.64171	0.00822956	CMN/G
Chloroflexi_bacterium_13_1_40CM_3_70_6	1.64168	0.0141819	CMN/G
Pseudomonas_salina	-1.64003	0.0480766	N/G
Oblitimonas_alkaliphila	-1.63567	0.0226176	CMN/G
Planktothrix_paucivesiculata	-1.63037	0.0138209	CMN/G
Caulobacter_sp.	-1.62751	0.0141821	CMN/G
uncultured_crenarchaeote_29d5	1.62638	0.0106301	CMN/G
Cellvibrio_sp._79	-1.62632	0.0206265	N/G
uncultured_bacterium_lac121	1.61822	0.0301737	CMN/G
Candidatus_Nitrosocosmicus_exaquare	1.60619	0.0129817	CMN/G
Cellvibrio_mixtus	-1.60518	0.04273	N/G
Pseudomaricurvus_alkylphenolicus	-1.59742	0.00958791	N/G
Pseudoalteromonas_sp._J010	-1.59067	0.038397	CMN/G
Cellvibrio_sp._KY-GH-1	-1.59034	0.0247481	N/G
Microbulbifer_sp._SH-1	-1.58782	0.0479375	2AN/G
Aliivibrio_fischeri	-1.57906	0.0204234	CMN/G
Pseudomonas_sp._21	-1.57134	0.00990876	CMN/G
Chloroflexi_bacterium_13_1_40CM_68_21	1.56388	0.0236516	CMN/G
Alphaproteobacteria_bacterium_HGW-Alphaproteobacteria-14	-1.55854	0.0223594	CMN/G
Marinobacter_sp._NP-6	-1.55248	0.00859893	N/G
Thalassocella_blandensis	-1.55175	0.0402226	CMN/G
Alkalimonas_amylolytica	-1.55071	0.0466224	N/G
Chloroflexi_bacterium_13_1_40CM_4_68_4	1.54714	0.0435428	CMN/G
Thalassolituus_oleivorans	-1.54387	0.0323199	CMN/G
Halomonas_sp._BL6	-1.5414	0.00557915	CMN/G
Cellvibrio_japonicus	-1.53268	0.0165772	N/G
Spongiibacter_tropicus	-1.53178	0.0463837	N/G
Candidatus_Bathyarchaeota_archaeon_RBG_13_38_9	1.52894	0.00517662	CMN/G
Marinobacterium_halophilum	-1.52491	0.00307898	CMN/G
Porphyrobacter_sp._AAP60	-1.52158	0.0117175	CMN/G
Hydrocarboniclastica_marina	-1.51698	0.00167681	N/G
Alphaproteobacteria_bacterium_HGW-Alphaproteobacteria-9	-1.51536	0.0141821	CMN/G
Spongiibacter_sp._IMCC21906	-1.51105	0.0128993	CMN/G
gamma_proteobacterium_HdN1	-1.51038	0.034207	CMN/G
Aestuariicella_hydrocarbonica	-1.49583	0.0204636	CMN/G
Cellvibrio_sp._BR	-1.49556	0.00559625	N/G
Rheinheimera_pacifica	-1.49527	0.00864234	N/G
Kamptonema_sp._SIO4C4	-1.49335	0.0193615	N/G
Pseudomonas_batumici	-1.4891	0.0173947	CMN/G
Cellvibrio_sp._OA-2007	-1.48624	0.0165772	N/G
Nitrososphaeraceae_archaeon	1.48495	0.0106301	CMN/G
Candidatus_Nitrosocosmicus_sp._SS	1.48338	0.0402226	CMN/G
Microbulbifer_pacificus	-1.47785	0.00556453	N/G
Candidatus_Nitrososphaera_evergladensis	1.47234	0.00332595	CMN/G
Bermanella_marisrubri	-1.46584	0.0199664	CMN/G
Grimontia_celer	-1.46222	0.0437655	CMN/G
Chloroflexi_bacterium_RIFCSPLOWO2_02_FULL_71_16	1.45995	0.0103804	CMN/G
Candidatus_Endobugula_sertula	-1.45985	0.00138706	N/G
Sphingopyxis_sp._BSNA05	1.45854	0.0402226	CMN/G
Thalassolituus_oleivorans	-1.45466	0.0157181	N/G
Microbulbifer_donghaiensis	-1.4538	0.0361751	N/G
Pseudomonas_sp._ATCC_13867	-1.45343	0.00640223	CMN/G
Thaumarchaeota_archaeon_13_1_20CM_2_39_20	1.4507	0.0444769	CMN/G
Porphyrobacter_sp.	-1.44898	0.0155727	CMN/G
Candidatus_Endobugula_sertula	-1.4389	0.00640223	CMN/G
Porphyrobacter_sp._CACIAM_03H1	-1.43025	0.0141821	CMN/G
Microbulbifer_sp._SH-1	-1.42402	0.00511121	N/G
Methylophaga_frappieri	-1.41904	0.0357705	CMN/G
Thiomicrorhabdus_sp._AkT22	-1.41354	0.0158645	N/G
Porphyrobacter_colymbi	-1.41313	0.0117175	CMN/G
Porphyrobacter_sp._TH134	-1.4119	0.0141821	CMN/G
Microbulbifer_sp._YPW1	-1.41137	0.0242922	N/G
Cellvibrio_sp._YR554	-1.40742	0.00771476	N/G
Spongiibacter_sp._IMCC21906	-1.39956	0.00799326	N/G
Gymnopus_androsaceus	-1.39924	0.047604	CMN/G
Alteromonas_stellipolaris	-1.39886	0.0473944	2AN/G
Halomonas_sp._es.049	-1.39758	0.0293276	CMN/G
Oblitimonas_alkaliphila	-1.39567	0.0421371	N/G
Diaphorobacter_polyhydroxybutyrativorans	-1.39519	0.0169497	N/G
Alcanivorax_sp._IO_7	-1.38238	0.00896069	CMN/G
Porphyrobacter_dokdonensis	-1.38127	0.0155727	CMN/G
Hahella_sp._KA22	-1.37831	0.0322402	N/G
Alteromonadaceae_bacterium	-1.37775	0.0331803	N/G
Marinobacter_algicola	-1.3762	0.0155727	CMN/G
Microbacterium_phage_Burro	-1.37277	0.0289585	CMN/G
Halomonas_sp._GFAJ-1	-1.36913	0.0462596	CMN/G
Chloroflexi_bacterium_GWC2_70_10	1.36755	0.00650661	CMN/G
Cellvibrio_sp._KY-YJ-3	-1.36548	0.00687227	N/G
Nitrincola_tapanii	-1.36159	0.0110602	N/G
Solimonas_fluminis	-1.358	0.0470848	CMN/G
Thaumarchaeota_archaeon_13_1_40CM_38_12	1.35342	0.00749189	CMN/G
Pseudomonas_sp._IzPS43_3003	1.35137	0.00464486	CMN/G
Pseudomaricurvus_alkylphenolicus	-1.35133	0.034207	CMN/G
Nitrososphaera_viennensis	1.3472	0.00749189	CMN/G
Streptomyces_sp._OK228	1.34679	0.00640223	CMN/G
Porphyrobacter_donghaensis	-1.346	0.0155727	CMN/G
Rhodobacter_sp.	-1.34462	0.0470848	CMN/G
Hahella_sp._KA22	-1.3432	0.0314917	CMN/G
Motilimonas_sp._PLHSC7-2	-1.3429	0.0339007	N/G
Pseudomonas_zhaodongensis	-1.33041	0.00734814	N/G
Pseudomonas_sp._URMO17WK12:I12	-1.33038	0.046314	N/G
Bermanella_marisrubri	-1.33013	0.013591	N/G
Oceanospirillum_sanctuarii	-1.32674	0.0101192	N/G
Nitrincola_tapanii	-1.32371	0.0117175	CMN/G
Chloroflexi_bacterium_RIFCSPLOWO2_12_FULL_71_12	1.31915	0.0168792	CMN/G
Kangiellaceae_bacterium	-1.3182	0.0223594	2AN/G
Colwellia_sp._OISW-25	-1.31297	0.0388215	N/G
Porphyrobacter_sp._HL-46	-1.31182	0.0204636	CMN/G
Erythrobacteraceae_bacterium_CCH12-C2	-1.31079	0.0106301	CMN/G
Pseudomaricurvus_sp._HS19	-1.30907	0.0371753	N/G
Cellvibrio_sp.	-1.30592	0.0203382	N/G
Neptuniibacter_caesariensis	-1.30592	0.0381851	CMN/G
Rheinheimera_pacifica	-1.3059	0.0402226	CMN/G
Microbacterium_phage_Burro	-1.3058	0.0136455	N/G
Hahella_chejuensis	-1.30526	0.00521318	N/G
Oleiphilus_sp.	-1.30382	0.0396061	CMN/G
Pseudoalteromonas_sp._J010	-1.30355	0.0197841	N/G
Massilia_genomosp._1	-1.30248	0.00416163	2AN/G
Streptomyces_sp._Ag82_O1-9	1.30179	0.0326667	CMN/G
Microbulbifer_sp._SH-1	-1.30106	0.0443947	CMN/G
Actinobacteria_bacterium_RBG_19FT_COMBO_70_19	1.3006	0.0244013	CMN/G
Oceanospirillum_sp._D5	-1.28581	0.0386667	CMN/G
Roseovarius_nanhaiticus	-1.28239	0.0347247	CMN/G
Alcanivorax_sp._S71-1-4	-1.28216	0.0141821	CMN/G
uncultured_bacterium_lac121	1.27832	0.0228686	N/G
Limnobacter_sp._SAORIC-580	-1.27754	0.0239554	N/G
Thermotogales_bacterium	-1.27169	0.0371715	N/G
Hahella_sp._CCB-MM4	-1.27125	0.00885879	N/G
Cellvibrio_sp._YR554	-1.26775	0.0204636	CMN/G
Halomonas_sp._QHL1	-1.26647	0.0117554	CMN/G
Pseudomonas_sp._16W4-4-3	-1.26409	0.0314917	2AN/G
Kangiellaceae_bacterium	-1.25987	0.00798779	N/G
Chloroflexi_bacterium_13_1_40CM_2_70_6	1.25513	0.00418288	CMN/G
Microbulbifer_sp._HZ11	-1.25499	0.0314318	CMN/G
bacterium_HR12	1.25498	0.0223594	CMN/G
Aquisalimonas_asiatica	-1.2547	0.0155727	CMN/G
Janthinobacterium_sp._BJB1	-1.25392	0.00638998	CMN/G
Halomonas_sp._es.049	-1.25327	0.02477	N/G
Gayadomonas_joobiniege	-1.25176	0.00374755	CMN/G
Pseudomonas_sp._16W4-4-3	-1.25109	0.014528	N/G
Arthrobacter_silvisoli	1.25038	0.0187059	CMN/G
Chloroflexi_bacterium_13_1_40CM_68_15	1.25013	0.00750344	CMN/G
Zhongshania_aliphaticivorans	-1.24831	0.0223594	CMN/G
Gemmobacter_sp._HYN0069	-1.24654	0.0435428	CMN/G
Nitrososphaera_sp.	1.24643	0.00710492	CMN/G
Pseudomonas_khazarica	-1.2426	0.0236676	CMN/G
Pseudoalteromonas_luteoviolacea	-1.24188	0.0402226	CMN/G
Nitrosopumilus_sp._b1	1.24016	0.0183894	CMN/G
Halomonadaceae_bacterium	-1.24015	0.0161246	CMN/G
Arthrobacter_phage_Racecar	-1.23462	0.029845	2AN/G
Vibrio_owensii	-1.23137	0.0347247	CMN/G
Bermanella_sp.	-1.23072	0.00581349	CMN/G
Microbulbifer_rhizosphaerae	-1.22744	0.0101498	N/G
Microbulbifer_hydrolyticus	-1.22696	0.0470848	2AN/G
Aeromonas_lusitana	-1.22488	0.00380141	CMN/G
Ketobacter_sp.	-1.22238	0.028702	N/G
Vibrio_owensii	-1.21937	0.0290805	N/G
Armatimonadetes_bacterium_RBG_19FT_COMBO_69_19	1.21692	0.0128993	CMN/G
Halioglobus_maricola	-1.20852	0.0182693	CMN/G
Pseudomonas_litoralis	-1.20763	0.0479375	CMN/G
Hahella_chejuensis	-1.20746	0.0204636	CMN/G
Microbulbifer_sp._HZ11	-1.20717	0.015946	N/G
Zhongshania_sp._DSW25-10	-1.20527	0.00563054	CMN/G
Porphyrobacter_sanguineus	-1.20392	0.0141821	CMN/G
Flavobacterium_album	1.20223	0.0487186	N/G
Nitrospirae_bacterium_RBG_19FT_COMBO_58_9	1.19237	0.00640223	CMN/G
Methylophaga_frappieri	-1.19138	0.0105153	N/G
Hydrocarboniclastica_marina	-1.19055	0.0314917	2AN/G
Oceanospirillum_sanctuarii	-1.18903	0.0400234	CMN/G
Hahellaceae_bacterium	-1.18621	0.0226069	N/G
Pseudoalteromonas_rubra	-1.18607	0.0196745	N/G
Shewanella_japonica	-1.18229	0.0291665	CMN/G
Gammaproteobacteria_bacterium_HGW-Gammaproteobacteria-15	-1.18107	0.0353341	2AN/G
Pseudomonas_sp._21	-1.1797	0.0283963	N/G
Paenibacillus_sp._Leaf72	-1.17914	0.0130214	CMN/G
Endozoicomonas_elysicola	-1.17694	0.0203382	N/G
Halomonas_sp._BL6	-1.17416	0.0398867	N/G
Limnohabitans_sp._Hippo4	-1.17215	0.0200406	CMN/G
Porphyrobacter_sp._YT40	-1.17099	0.0106301	CMN/G
Erythrobacter_sp._CCH5-A1	-1.17048	0.00712354	CMN/G
Colwellia_sp._UCD-KL20	-1.16825	0.0172558	CMN/G
Pseudomonas_jilinensis	-1.16694	0.0464458	N/G
Microbulbifer_aggregans	-1.16689	0.00698822	N/G
Pseudomonas_litoralis	-1.16329	0.0118182	N/G
Oleiphilus_messinensis	-1.16061	0.00470073	N/G
Marinobacter_algicola	-1.15628	0.00386714	N/G
Microbacterium_phage_Araxxi	-1.15595	0.0393016	N/G
Endozoicomonas_elysicola	-1.15395	0.0141821	CMN/G
Catenovulum_sp._RQJ05	-1.1522	0.00967615	N/G
Marinobacterium_halophilum	-1.15219	0.00632116	N/G
halophilic_archaeon	1.15215	0.00432028	CMN/G
Marortus_luteolus	-1.14887	0.0396061	CMN/G
Shewanella_japonica	-1.14799	0.0255843	N/G
Oleiphilus_messinensis	-1.14368	0.0204636	CMN/G
Marortus_luteolus	-1.13965	0.0204219	N/G
Pseudomonas_argentinensis	-1.1389	0.0209011	CMN/G
Gammaproteobacteria_bacterium_HGW-Gammaproteobacteria-14	-1.13883	0.0265981	CMN/G
Rhodococcus_virus_Poco6	-1.13701	0.00743048	CMN/G
Nitrospira_sp._CR1.3	1.1357	0.0170782	CMN/G
Shewanella_xiamenensis	-1.13314	0.0479807	2AN/G
Nitrospira_sp._KM1	1.13243	0.0289585	CMN/G
Arthrobacter_phage_Wilde	-1.13008	0.0381851	2AN/G
Candidatus_Nitrosocaldus_cavascurensis	1.12497	0.0244013	CMN/G
Zhongshania_antarctica	-1.11834	0.00943219	N/G
Marinobacter_sp._ZYF650	-1.11782	0.0104585	N/G
Gammaproteobacteria_bacterium_BRH_c0	-1.11641	0.034207	CMN/G
Reinekea_marinisedimentorum	-1.11407	0.0414682	N/G
Pleionea_mediterranea	-1.11397	0.0435428	2AN/G
Pseudomonas_seleniipraecipitans	-1.11383	0.0251818	2AN/G
Moritella_sp.	-1.11218	0.0226176	CMN/G
Paraglaciecola_sp._D3211	-1.10992	0.0261494	CMN/G
Microbacterium_phage_Arete	-1.10738	0.0288961	N/G
Alcanivorax_sp._HI0083	-1.1062	0.00248319	CMN/G
Kangiella_sp.	-1.10421	0.0278709	N/G
Pseudoalteromonas_sp._Z9A5	-1.10014	0.0103808	CMN/G
Massilia_violaceinigra	-1.09441	0.0078738	2AN/G
Microbulbifer_rhizosphaerae	-1.08988	0.0265981	CMN/G
Pseudomonas_psychrophila	-1.08869	0.0243051	CMN/G
Xenorhabdus_ishibashii	-1.08337	0.0218189	N/G
Janthinobacterium_sp._BJB1	-1.08155	0.00249668	N/G
Pseudomonas_sp._ATCC_13867	-1.0749	0.00687227	N/G
Alteromonas_lipolytica	-1.07332	0.0044049	N/G
Streptomyces_sp._OK885	1.07154	0.0106301	CMN/G
Pleionea_mediterranea	-1.07146	0.00948498	N/G
Aliikangiella_sp._M105	-1.07126	0.00826933	N/G
Methylomarinum_vadi	-1.06949	0.00184858	CMN/G
Alphaproteobacteria_bacterium_HGW-Alphaproteobacteria-7	-1.06815	0.00871403	CMN/G
Candidatus_Rokubacteria_bacterium_RIFCSPHIGHO2_12_FULL_73_22	1.06713	0.0353695	CMN/G
Pyrinomonadaceae_bacterium	1.06709	0.0117175	CMN/G
Spongiibacter_sp._KMU-166	-1.06591	0.0180252	N/G
Pseudomonas_kuykendallii	-1.06555	0.0420518	N/G
bacterium_AMD02	-1.06158	0.0200406	2AN/G
Vibrio_tubiashii	-1.06136	0.0357531	N/G
Gammaproteobacteria_bacterium_LSUCC0112	-1.061	0.0204636	CMN/G
Altererythrobacter_salegens	-1.05798	0.00826933	N/G
Pseudomonas_khazarica	-1.05614	0.00245525	N/G
Erythrobacter_sp._YT30	-1.05277	0.0117175	CMN/G
Methylophaga_sp._SB9B	-1.05129	0.0482513	N/G
Kineobactrum_sediminis	-1.05108	0.0187973	N/G
Acidobacteria_bacterium_13_1_40CM_3_55_6	1.04971	0.0192112	CMN/G
Candidatus_Rokubacteria_bacterium_RBG_16_73_20	1.04948	0.0265981	CMN/G
Chloroflexi_bacterium_13_1_40CM_67_9	1.04916	0.0249726	N/G
Desulfurispira_natronophila	-1.0488	0.0105156	CMN/G
Tilletia_indica	-1.04819	0.0384329	CMN/G
Sorangium_sp.	-1.04675	0.0435428	CMN/G
Candidatus_Rokubacteria_bacterium_13_1_20CM_2_69_58	1.04613	0.034207	CMN/G
Bradyrhizobium_sp._aSej3	-1.04305	0.0470848	2AN/G
Pseudomonas_pelagia	-1.04101	0.0493757	N/G
Gordonia_phage_OhMyWard	-1.04018	0.0384329	CMN/G
Psychrobacter_frigidicola	-1.03711	0.0296394	CMN/G
Pseudomonas_fragi	-1.03354	0.00225784	N/G
Burkholderia_sp._8Y	-1.03333	0.037114	CMN/G
Bradyrhizobium_sp._aSej3	-1.03317	0.00868695	N/G
uncultured_actinobacterium_Rifle_16ft_4_minimus_38826	1.03211	0.0289585	CMN/G
Halomonas_hydrothermalis	-1.03101	0.0498819	CMN/G
Microbulbifer_aggregans	-1.03071	0.0192112	CMN/G
Microbulbifer_sp._GL-2	-1.02932	0.0140737	N/G
Alteromonas_lipolytica	-1.02908	0.0129886	CMN/G
Congregibacter_litoralis	-1.02908	0.00461773	N/G
Xenorhabdus_ishibashii	-1.02842	0.0489046	CMN/G
Thaumarchaeota_archaeon	1.02772	0.0295541	N/G
Pseudomonas_salegens	-1.02739	0.0129817	CMN/G
Gammaproteobacteria_bacterium_BRH_c0	-1.02689	0.0116433	N/G
Porphyrobacter_sp._LM_6	-1.02513	0.034207	CMN/G
Amycolatopsis_jiangsuensis	1.02306	0.0435428	2AN/G
Alcanivorax_sp._S71-1-4	-1.02293	0.0110835	N/G
Shewanella_sp._KCT	-1.02116	0.0222038	N/G
Chloroflexi_bacterium_13_1_40CM_68_21	1.0178	0.00925951	N/G
Streptomyces_sp._MOE7	1.017	0.0141819	CMN/G
Halioglobus_maricola	-1.01665	0.00578044	N/G
Marinospirillum_alkaliphilum	-1.0163	0.0435428	2AN/G
Nitrospira_japonica	1.01468	0.0314917	CMN/G
Porphyrobacter_sp._AAP82	-1.01349	0.0265981	CMN/G
Thaumarchaeota_archaeon_CSP1-1	1.01319	0.0217682	CMN/G
Marinobacter_pelagius	-1.01179	0.0325995	2AN/G
Alkalinema_sp._RU_4_3	-1.00572	0.0265981	CMN/G
Actinobacteria_bacterium_13_1_20CM_2_65_11	1.005	0.0265981	CMN/G
Sphingomonas_ursincola	-1.00389	0.0493757	N/G
Mycobacterium_phage_Onyinye	-1.00337	0.0226405	CMN/G
Marinobacter_subterrani	1.00331	0.0182195	N/G
Sphingobium_sp._AEW4	-1.00111	0.00263317	CMN/G
