# Supplementary material for: Impact of Different Treatment Methods and Timings on Soil Microbial Communities with Transgenic Maize Straw Return
Source: Research Square preprint supplement (doi:10.21203/rs.3.rs-5612017/v1), 2025-04-10
Supplement: Supplementary file 2 [file 701f1617a2cc7048534e180e.xlsx]

## Sheet: M1
Species	log2FoldChange	pValue	Group
Arcobacter_cryaerophilus	9.68797	0.01455	M1_G
Arcobacter_cryaerophilus	9.66942	0.00620803	M1_N
Flavobacterium_akiainvivens	8.66546	0.0417582	M1_G
Neisseriales_bacterium	8.48894	0.0267349	M1_G
Agrobacterium_tumefaciens	8.17846	0.0296703	M1_G
Agrobacterium_sp._CNPSo_675	7.97955	0.00632318	M1_G
Neisseriales_bacterium	7.96463	0.0267349	M1_N
Acremonium_chrysogenum	7.37903	0.0197802	M1_N
Bacteriovoracaceae_bacterium	7.37109	0.0043956	M1_G
Rhizobium_sp._Root491	7.23593	0.0131868	M1_G
Candidatus_Dojkabacteria_bacterium	7.08019	0.0296703	M1_G
Zancudomyces_culisetae	6.90961	0.0267349	M1_N
Roseovarius_sp._MCTG156(2b)	6.64813	0.0417582	M1_G
Fluviicola_sp._SGL-29	6.63717	0.0151809	M1_G
Acremonium_chrysogenum	6.58253	0.0296703	M1_G
Candidatus_Wolfebacteria_bacterium	6.52692	0.0278744	M1_G
Streptomyces_sp._S1D4-14	6.48698	0.0131868	M1_G
Aquabacterium_parvum	6.41135	0.0197802	M1_G
Marinobacter_salarius	6.4043	0.00769231	M1_N
Candidatus_Moranbacteria_bacterium_RIFCSPLOWO2_12_FULL_48_12	6.33616	0.0463455	M1_G
Spirochaetes_bacterium	6.1344	0.0296703	M1_N
Streptomyces_sp._S1D4-14	6.09649	0.0131868	M1_N
Marinobacter_sp.	6.0946	0.0197802	M1_N
Candidatus_Moranbacteria_bacterium_RIFCSPLOWO2_12_FULL_48_12	6.072	0.01455	M1_N
Fluviicola_sp._SGL-29	6.06786	0.0151809	M1_N
Roseovarius_sp._MCTG156(2b)	6.05228	0.0021978	M1_N
Spirochaetes_bacterium	6.04309	0.0043956	M1_G
Candidatus_Gracilibacteria_bacterium	5.96141	0.0417582	M1_G
Siphoviridae_sp.	5.95238	0.0227747	M1_G
Siphoviridae_sp.	5.93909	0.010301	M1_N
Streptomyces_africanus	5.8736	0.0131868	M1_G
Rhizobium_sp._SJZ105	5.86268	0.00409199	M1_G
Candidatus_Taylorbacteria_bacterium_RIFCSPLOWO2_12_FULL_44_9	5.85459	0.0446704	M1_G
Sphingobacteriia_bacterium_28-36-52	5.84812	0.0267349	M1_N
Acidovorax_phage_ACPWH	5.84227	0.0446704	M1_G
Marinobacter_sp._NP-6	5.80558	0.00409199	M1_N
Sphingobacteriia_bacterium_28-36-52	5.77058	0.0267349	M1_G
Comamonadaceae_bacterium_2PF	5.76567	0.0131868	M1_G
Vibrio_parahaemolyticus	5.75025	0.0417582	M1_N
Thelephora_ganbajun	-5.74707	0.00382007	M1_N
Bacteroidetes_bacterium_ADurb.BinA104	5.72155	0.00907602	M1_N
Aquabacterium_parvum	5.7112	0.0043956	M1_N
Streptomyces_sp._NRRL_S-455	5.65941	0.0131868	M1_G
Alphaproteobacteria_bacterium_41-28	5.65332	0.0312322	M1_G
Comamonadaceae_bacterium_CG_4_9_14_0_8_um_filter_57_21	5.57381	0.0296703	M1_G
Bacteroidetes_bacterium_ADurb.BinA104	5.5301	0.017959	M1_G
Candidatus_Fonsibacter_lacus	5.52266	0.0267349	M1_G
Streptomyces_africanus	5.51472	0.0131868	M1_N
Candidatus_Magasanikbacteria_bacterium_CG_4_10_14_0_2_um_filter_41_10	-5.50638	0.00293063	M1_N
Bacteroidetes_bacterium_ADurb.Bin302	5.4861	0.0446704	M1_G
Stachybotrys_chartarum	5.4419	0.00907602	M1_N
Candidatus_Magasanikbacteria_bacterium_CG_4_10_14_0_2_um_filter_41_10	-5.41792	0.00168764	M1_G
Diaphorobacter_sp._HDW4B	5.36149	0.0289309	M1_G
Marinobacter_subterrani	5.35181	0.0417582	M1_G
Aquabacterium_sp._KMB7	5.3363	0.0296703	M1_G
Geosmithia_morbida	5.33279	0.00813374	M1_N
Aquabacterium_olei	5.32565	0.0296703	M1_N
Vampirovibrio_chlorellavorus	5.30454	0.017959	M1_G
Acidovorax_phage_ACPWH	5.29428	0.0446704	M1_N
Alphaproteobacteria_bacterium_41-28	5.27218	0.0463455	M1_N
Streptomyces_sp._NRRL_S-455	5.2564	0.0417582	M1_N
Cellvibrionaceae_bacterium_Bs12	5.24199	0.0289309	M1_N
Agitococcus_lubricus	5.24069	0.0417582	M1_N
Neonectria_ditissima	5.23969	0.0151809	M1_N
Roseovarius_sp.	5.21447	0.0010989	M1_G
Purpureocillium_lilacinum	5.20867	0.00813374	M1_N
Rhodobacterales_bacterium_12-65-15	5.20397	0.0446704	M1_N
Roseovarius_mucosus	5.20308	0.0043956	M1_G
Caudovirales_GX15bay	5.18911	0.0151809	M1_G
Caudovirales_GX15bay	5.18786	0.00409199	M1_N
Flavobacterium_sp._CJ74	5.18744	0.0438213	M1_G
Rhodobacterales_bacterium_12-65-15	5.1661	0.0151809	M1_G
Streptomyces_virus_Bing	5.16317	0.0447678	M1_N
Tepidimonas_charontis	5.16004	0.0296703	M1_N
Burkholderia_territorii	5.09983	0.0043956	M1_N
Comamonadaceae_bacterium_2PF	5.0705	0.0417582	M1_N
Marivivens_sp.	5.04941	0.0267349	M1_G
Burkholderia_territorii	5.02899	0.0391059	M1_G
Stenotrophomonas_phage_vB_SmaS-DLP_6	5.02405	0.00813374	M1_G
Nostocales_cyanobacterium_W4_Combined_metabat2_030	4.99926	0.020275	M1_N
Lewinella_sp._W8	4.95717	0.042254	M1_N
Macromonas_bipunctata	4.91667	0.0296703	M1_N
Candidatus_Latescibacteria_bacterium_ADurb.Bin168	4.89518	0.0417582	M1_N
Pleurotus_citrinopileatus	-4.88937	0.000181214	M1_N
Coniochaeta_pulveracea	4.88524	0.0131868	M1_N
Giesbergeria_anulus	4.86213	0.00769231	M1_G
Alphaproteobacteria_bacterium_PA3	4.83855	0.0043956	M1_N
Pleurotus_citrinopileatus	-4.83778	0.00168764	M1_G
Salmonella_enterica	4.83719	0.0043956	M1_G
Verrucomicrobia_bacterium_RIFCSPHIGHO2_12_FULL_41_10	4.78803	0.0010989	M1_N
Enterococcus_faecium	4.77884	0.0267349	M1_G
Acidovorax_sp._SD340	4.76509	0.0131868	M1_N
Tolypocladium_ophioglossoides	4.76189	0.0267349	M1_N
Microbacterium_phage_Camille	4.75526	0.0336911	M1_N
Klebsiella_pneumoniae	4.7085	0.0296703	M1_G
Verrucomicrobia_bacterium_RIFCSPHIGHO2_12_FULL_41_10	4.70515	0.0296703	M1_G
Roseovarius_mucosus	4.67467	0.0010989	M1_N
Roseovarius_sp.	4.67361	0.0021978	M1_N
Thelephora_ganbajun	-4.66357	0.00409199	M1_G
Stachybotrys_chartarum	4.63946	0.0244437	M1_G
Coniochaeta_pulveracea	4.638	0.0043956	M1_G
Aquabacterium_sp._KMB7	4.63297	0.0043956	M1_N
Delftia_acidovorans	4.63137	0.0043956	M1_N
Roseovarius_sp._EC-HK134	4.63038	0.0197802	M1_G
Burkholderiales_bacterium_RIFCSPLOWO2_12_FULL_61_40	4.60055	0.0197802	M1_G
Neonectria_ditissima	4.59648	0.00813374	M1_G
Giesbergeria_anulus	4.58013	0.0021978	M1_N
Geosmithia_morbida	4.56789	0.00813374	M1_G
Elizabethkingia_meningoseptica	4.56429	0.0177061	M1_G
Fusarium_decemcellulare	4.56144	0.0151809	M1_N
Spongiibacter_tropicus	4.53455	0.0131868	M1_N
Purpureocillium_lilacinum	4.53032	0.0151809	M1_G
Undibacterium_sp._YM2	4.53001	0.00769231	M1_N
Pochonia_chlamydosporia	4.52308	0.0151809	M1_N
Enterococcus_faecium	4.45324	0.0267349	M1_N
Halobacteriovoraceae_bacterium	4.42881	0.0010989	M1_G
Candidatus_Methanofastidiosa_archaeon	4.40863	0.0446704	M1_N
Streptomyces_sp._JB150	4.40805	0.00907602	M1_N
Acidovorax_facilis	4.40795	0.0197802	M1_N
Flavobacterium_subsaxonicum	4.37693	0.00813374	M1_G
Agarilytica_rhodophyticola	4.37145	0.0417582	M1_N
Glycomyces_artemisiae	4.36656	0.0296703	M1_G
Salmonella_enterica	4.34082	0.0010989	M1_N
Tolypocladium_paradoxum	4.30478	0.0378126	M1_G
Streptomyces_sp._JB150	4.30125	0.0447678	M1_G
Fusarium_albosuccineum	4.29174	0.0267349	M1_N
Comamonas_thiooxydans	4.28911	0.0417582	M1_G
Candidatus_Methanofastidiosa_archaeon	4.28826	0.0267349	M1_G
Antribacter_gilvus	4.27963	0.0296703	M1_N
Microbacterium_phage_DizzyRudy	4.26995	0.00892378	M1_N
Klebsiella_quasipneumoniae	4.26973	0.0131868	M1_G
Leptolyngbyaceae_cyanobacterium_RM2_2_4	4.26268	0.0197802	M1_N
Candidatus_Saccharibacteria_bacterium	4.25615	0.0131868	M1_N
Rathayibacter_sp._AY1C1	4.23056	0.0151809	M1_N
Marinobacter_subterrani	4.22095	0.0131868	M1_N
Chlorobi_bacterium_OLB5	4.19431	0.00813374	M1_N
Limnohabitans_sp._2KL-1	4.1737	0.0296703	M1_G
Xanthomonas_phage_XacN1	4.15858	0.00813374	M1_G
Acidovorax_sp._HMWF018	4.15043	0.0010989	M1_N
Candidatus_Saccharibacteria_bacterium_RIFCSPHIGHO2_01_FULL_46_30	4.14974	0.0296703	M1_G
Comamonas_thiooxydans	4.14526	0.0417582	M1_N
Candidatus_Nomurabacteria_bacterium_RIFCSPLOWO2_01_FULL_39_18	4.13766	0.0267349	M1_G
Rhodoferax_fermentans	4.1351	0.0296703	M1_G
Isoptericola_sp._BMS4	4.10591	0.01455	M1_N
Candidatus_Nomurabacteria_bacterium_RIFCSPLOWO2_01_FULL_39_18	4.10016	0.0446704	M1_N
Tolypocladium_ophioglossoides	4.09974	0.0151809	M1_G
Candidatus_Saccharibacteria_bacterium_RIFCSPHIGHO2_12_FULL_44_22	4.09593	0.0197802	M1_N
Arthrobacter_phage_Mimi	4.09447	0.0152183	M1_N
Tenericutes_bacterium	4.094	0.00409199	M1_N
Fusarium_decemcellulare	4.07753	0.0267349	M1_G
Rhodobacteraceae_bacterium_HSP-20	4.07656	0.00769231	M1_N
Fusarium_zealandicum	4.07424	0.0446704	M1_N
Phocaeicola_vulgatus	4.07233	0.0446704	M1_N
Burkholderiales_bacterium_PBB4	4.06638	0.0131868	M1_G
Marinobacter_sp._NP-6	4.05407	0.0267349	M1_G
Crocinitomicaceae_bacterium	4.04854	0.0043956	M1_G
Rhodoferax_fermentans	4.04186	0.0197802	M1_N
Mucilaginibacter_pedocola	4.03499	0.0151809	M1_N
Undibacterium_sp._NL8W	4.03073	0.0296703	M1_N
Roseovarius_sp._EC-HK134	4.02965	0.0296703	M1_N
Burkholderiales_bacterium_RIFCSPLOWO2_12_FULL_61_40	4.02387	0.0197802	M1_N
Halobacteriovorax_marinus	4.01988	0.0417582	M1_G
Caldisericales_bacterium	4.00382	0.0267349	M1_G
Candidatus_Nomurabacteria_bacterium_RIFCSPLOWO2_01_FULL_42_20	4.00246	0.010301	M1_N
Stenotrophomonas_phage_vB_SmaS-DLP_6	3.99342	0.00813374	M1_N
Agrobacterium_sp._10MFCol1.1	3.98242	0.0446704	M1_G
Acetobacter_aceti	3.96934	0.0267349	M1_N
Tolypocladium_capitatum	3.9373	0.0151809	M1_N
Halobacteriovoraceae_bacterium	3.92071	0.0010989	M1_N
Promicromonospora_kroppenstedtii	3.9142	0.0417582	M1_N
Candidatus_Uhrbacteria_bacterium_RIFCSPHIGHO2_02_FULL_60_10	3.90978	0.0446704	M1_G
Mucilaginibacter_pedocola	3.9015	0.0267349	M1_G
Deltaproteobacteria_bacterium_CG11_big_fil_rev_8_21_14_0_20_47_16	3.88554	0.00813374	M1_G
Pochonia_chlamydosporia	3.88455	0.00813374	M1_G
Klebsiella_pneumoniae	3.8667	0.0197802	M1_N
Tenericutes_bacterium	3.86161	0.00813374	M1_G
Vibrio_cholerae	3.86148	0.00769231	M1_N
Nocardia_phage_NTR1	3.8469	0.0267349	M1_G
Streptomyces_swartbergensis	3.82983	0.0197802	M1_G
Pelomonas_sp._HMWF004	3.8258	0.0197802	M1_G
Candidatus_Amesbacteria_bacterium_RIFCSPLOWO2_01_FULL_48_25	3.82107	0.0446704	M1_N
Elusimicrobia_bacterium_RBG_16_66_12	3.8137	0.0296703	M1_G
Metarhizium_anisopliae	3.80575	0.0151809	M1_N
Mycolicibacterium_hassiacum	3.79642	0.017959	M1_N
Streptomyces_azureus	3.78937	0.0296703	M1_G
Streptomyces_ossamyceticus	3.78439	0.0131868	M1_N
Comamonadaceae_bacterium_CG17_big_fil_post_rev_8_21_14_2_50_60_13	3.78344	0.0447678	M1_N
Diaphorobacter_polyhydroxybutyrativorans	3.7775	0.01455	M1_N
Klebsiella_quasipneumoniae	3.77693	0.0043956	M1_N
Trichoderma_harzianum	3.77452	0.00813374	M1_N
Mycolicibacterium_hassiacum	3.77396	0.0452426	M1_G
Limnohabitans_sp._2KL-1	3.75665	0.0021978	M1_N
Candidatus_Amesbacteria_bacterium_RIFCSPLOWO2_01_FULL_48_25	3.74484	0.0267349	M1_G
Rhodoferax_sp.	3.74313	0.0417582	M1_G
Chlorobi_bacterium_OLB5	3.71761	0.0151809	M1_G
Fusarium_sp._AF-8	3.71451	0.0446704	M1_N
Curvibacter_sp._AEP1-3	3.70621	0.0043956	M1_N
Candidatus_Saccharibacteria_bacterium_RIFCSPHIGHO2_01_FULL_46_30	3.68414	0.0131868	M1_N
Flavobacterium_rivuli	3.67737	0.01455	M1_G
Scedosporium_apiospermum	3.65479	0.00813374	M1_N
Mesorhizobium_sp._M4B.F.Ca.ET.143.01.1.1	3.6394	0.0446704	M1_N
Candidatus_Uhrbacteria_bacterium_RIFCSPHIGHO2_02_FULL_60_10	3.62924	0.0446704	M1_N
Colletotrichum_truncatum	3.6245	0.00813374	M1_N
Candidatus_Desulforudis_sp.	3.61947	0.0131868	M1_N
Flavobacterium_album	3.61881	0.0463455	M1_G
Streptomyces_ossamyceticus	3.61797	0.0131868	M1_G
Variovorax_sp._PAMC_28711	3.61631	0.0131868	M1_G
Brevundimonas_sp._Root1423	-3.60804	0.0010989	M1_G
Candidatus_Taylorbacteria_bacterium_CG10_big_fil_rev_8_21_14_0_10_41_48	3.59113	0.0446704	M1_G
Candidatus_Saccharibacteria_bacterium_49-20	3.58869	0.00769231	M1_N
Rhizobium_borbori	3.5847	0.0151809	M1_N
Fusarium_albosuccineum	3.57809	0.0446704	M1_G
Lomentospora_prolificans	3.57715	0.020275	M1_N
Agrobacterium_tumefaciens	3.57433	0.0131868	M1_N
Isoptericola_halotolerans	3.57377	0.0197802	M1_N
Cryomorphaceae_bacterium	3.57263	0.0417582	M1_N
Limnohabitans_sp._2KL-17	3.56711	0.0296703	M1_G
Stenotrophomonas_ginsengisoli	3.5652	0.0131868	M1_N
Tabrizicola_sp._TH137	3.54001	0.0197802	M1_N
Rhodoferax_sp._4810	3.5318	0.00769231	M1_N
Streptomyces_flavochromogenes	3.5274	0.0227747	M1_N
bacterium_AMD02	3.52682	0.017959	M1_N
Fusarium_zealandicum	3.52437	0.0446704	M1_G
Halomonadaceae_bacterium_R4HLG17	3.5224	0.0447678	M1_N
Ruegeria_sp._HKCCA4812	3.52116	0.0151809	M1_N
Ochrobactrum_intermedium	3.51909	0.0197802	M1_G
Burkholderiales_bacterium_RIFCSPHIGHO2_01_FULL_63_240	3.5079	0.0417582	M1_N
Magnaporthiopsis_poae	3.50583	0.0267349	M1_N
Nonomuraea_typhae	3.50509	0.0131868	M1_N
Porticoccus_sp.	3.48893	0.0131868	M1_N
Burkholderiales_bacterium_PBB4	3.48278	0.00769231	M1_N
Metarhizium_robertsii	3.47702	0.0446704	M1_N
Flavobacterium_akiainvivens	3.47416	0.0131868	M1_N
Limnohabitans_sp._63ED37-2	3.46903	0.0131868	M1_N
Shinella_sp._MEC087	3.46765	0.0332993	M1_G
Flavobacterium_beibuense	3.46075	0.0336911	M1_G
Absidia_glauca	3.45636	0.0446704	M1_N
Sinorhizobium_phage_ort11	3.4471	0.0463455	M1_G
Rugamonas_sp._SG757	-3.445	0.0010989	M1_G
Chryseobacterium_sp.	3.43679	0.0296703	M1_N
Ochrobactrum_intermedium	3.43208	0.0131868	M1_N
Modestobacter_sp._DSM_44400	-3.42759	0.0010989	M1_N
Pseudomonas_aeruginosa	3.42168	0.00769231	M1_G
Bordetella_avium	3.42093	0.0151809	M1_N
Colletotrichum_truncatum	3.41819	0.00409199	M1_G
Scedosporium_apiospermum	3.41616	0.0446704	M1_G
Dehalococcoides_mccartyi	3.41217	0.0021978	M1_N
Cupriavidus_sp._HMR-1	3.40154	0.0446704	M1_G
Enterobacter_cloacae	3.38591	0.0021978	M1_G
Bdellovibrio_phage_phi1422	3.38094	0.0446704	M1_N
Cellulomonas_hominis	3.37599	0.0131868	M1_N
Fusarium_sp._NRRL_66182	3.37455	0.0446704	M1_N
Ruegeria_sp._HKCCA4812	3.37062	0.0446704	M1_G
Agrobacterium_sp._ATCC_31749	3.36473	0.0312322	M1_G
Isoptericola_sp._BMS4	3.36416	0.010301	M1_G
Arthrobacter_phage_Mimi	3.36347	0.0152183	M1_G
Magnaporthiopsis_poae	3.3621	0.0446704	M1_G
Marinimicrobium_sp._SW121	3.3549	0.0417582	M1_N
Diaphorobacter_sp._HDW4A	3.354	0.00769231	M1_G
Pseudomonas_aeruginosa	3.34951	0.0010989	M1_N
Streptomyces_flavochromogenes	3.34845	0.0227747	M1_G
Metarhizium_guizhouense	3.3453	0.0267349	M1_N
Bordetella_avium	3.33531	0.0151809	M1_G
Saccharothrix_sp.	3.33346	0.0417582	M1_N
Brevundimonas_sp._Root1423	-3.32583	0.0010989	M1_N
Metarhizium_anisopliae	3.32373	0.0267349	M1_G
Duganella_sp._FT50W	3.32065	0.0131868	M1_N
Fusarium_beomiforme	3.31903	0.0446704	M1_N
Proteus_mirabilis	3.31751	0.0131868	M1_N
Agrobacterium_sp._CNPSo_675	3.29058	0.00632318	M1_N
Variovorax_sp._PAMC_28711	3.2902	0.00769231	M1_N
Rikenellaceae_bacterium	3.28819	0.0296703	M1_G
Streptomyces_sp._NBRC_110035	3.28595	0.012655	M1_G
Xanthomonas_phage_XacN1	3.28424	0.0151809	M1_N
Flavobacteriales_bacterium	3.27441	0.00769231	M1_N
Ralstonia_mannitolilytica	3.272	0.0010989	M1_N
Aestuariicella_hydrocarbonica	3.26918	0.0296703	M1_N
Erythromicrobium_ramosum	3.26732	0.0131868	M1_N
Streptomyces_prasinopilosus	3.25933	0.0296703	M1_N
Comamonas_testosteroni	3.25778	0.00769231	M1_N
Modestobacter_sp._DSM_44400	-3.25633	0.0010989	M1_G
Candidatus_Saccharibacteria_bacterium_32-50-13	3.25131	0.0197802	M1_N
Bacillus_thuringiensis	3.24578	0.0010989	M1_N
Pelomonas_sp._HMWF004	3.24497	0.0131868	M1_N
Tolypocladium_capitatum	3.24381	0.0446704	M1_G
Cloacibacterium_normanense	3.23874	0.0043956	M1_N
Saccharopolyspora_jiangxiensis	3.22815	0.0131868	M1_G
Lomentospora_prolificans	3.22746	0.020275	M1_G
Xanthomonas_phage_PPDBI	3.22737	0.0267349	M1_N
Comamonas_testosteroni	3.21557	0.0197802	M1_G
Flavobacterium_sp.	3.2139	0.00769231	M1_G
Methylocucumis_oryzae	3.21161	0.0452426	M1_N
Streptomyces_filamentosus	3.21049	0.01455	M1_G
Rhizobium_sp._J15	3.20756	0.0267349	M1_N
Cupriavidus_sp._HMR-1	3.20708	0.0267349	M1_N
Chlamydiae_bacterium_RIFCSPHIGHO2_12_FULL_49_9	3.19667	0.0463455	M1_G
Flavobacterium_cyanobacteriorum	3.19429	0.020275	M1_G
Streptomyces_prasinopilosus	3.19328	0.0197802	M1_G
Actinobacteria_bacterium_OV320	3.18909	0.0452426	M1_N
Xanthomonas_phage_PPDBI	3.18049	0.0446704	M1_G
Candidatus_Uhrbacteria_bacterium_CG_4_9_14_3_um_filter_36_7	3.18	0.0446704	M1_G
Flavobacterium_alkalisoli	3.17878	0.0227747	M1_G
Achromobacter_spanius	3.17776	0.0296703	M1_N
uncultured_bacterium_lac121	-3.1751	0.00426035	M1_N
Arthrobacter_phage_Qui	3.17176	0.004346	M1_N
Limnohabitans_sp._2KL-17	3.16867	0.0296703	M1_N
Microbulbifer_sp._HZ11	3.16657	0.0211227	M1_N
Rugamonas_sp._SG757	-3.15485	0.0010989	M1_N
Achromobacter_spanius	3.15479	0.0131868	M1_G
Caulobacter_sp._FWC2	3.1519	0.0131868	M1_N
Marinagarivorans_algicola	3.14939	0.0417582	M1_N
Negativicutes_bacterium	3.14483	0.0446704	M1_N
Mesorhizobium_sp._M7D.F.Ca.US.005.01.1.1	3.14196	0.0128529	M1_N
Negativicutes_bacterium	3.14158	0.0446704	M1_G
Stenotrophomonas_maltophilia	3.13758	0.0131868	M1_N
Aeromonas_caviae	3.13739	0.0131868	M1_G
Xanthomonas_phage_Xoo-sp13	3.13546	0.0151809	M1_G
Candidatus_Woesebacteria_bacterium_RBG_13_36_22	3.13523	0.0151809	M1_G
Streptomyces_sp._AVP053U2	3.13249	0.012655	M1_N
Candidatus_Saccharibacteria_bacterium_47-87	3.12884	0.0131868	M1_N
Rhodoferax_sp.	3.12613	0.0417582	M1_N
Streptomyces_sp._NRRL_F-6602	3.12373	0.0336911	M1_G
Trichoderma_asperellum	3.12285	0.0267349	M1_N
Trichoderma_gamsii	3.12171	0.0446704	M1_G
Bacillus_thuringiensis	3.1193	0.0197802	M1_G
Trichoderma_harzianum	3.11864	0.0151809	M1_G
Synechococcus_phage_B23	3.11569	0.0446704	M1_G
Isoptericola_sp._TLY-12	3.11105	0.0296703	M1_N
Saccharothrix_sp.	3.11068	0.0197802	M1_G
Citrobacter_phage_CVT22	3.10456	0.0151809	M1_N
Variovorax_sp._BK151	3.10329	0.0247613	M1_N
Fusarium_sp._AF-8	3.10218	0.0446704	M1_G
Limnohabitans_sp._2KL-27	3.10143	0.00769231	M1_G
Streptomyces_phage_Circinus	3.10088	0.0177061	M1_N
Actinobacteria_bacterium_OV320	3.09762	0.0332993	M1_G
Achromobacter_piechaudii	3.09545	0.0043956	M1_N
Roseovarius_sp._THAF9	3.09512	0.0267349	M1_G
Candidatus_Daviesbacteria_bacterium_RIFCSPLOWO2_01_FULL_43_15	3.08977	0.0325196	M1_G
Microbacterium_phage_Araxxi	3.08938	0.0131868	M1_N
Synechococcus_phage_B23	3.08668	0.0446704	M1_N
Streptomyces_filamentosus	3.08646	0.01455	M1_N
Candidatus_Saccharibacteria_bacterium_32-49-10	3.08604	0.0446704	M1_G
Rhizobium_sp._J15	3.08519	0.0267349	M1_G
Streptomyces_sp._CC71	3.08365	0.020275	M1_G
Candidatus_Saccharibacteria_bacterium_CG_4_10_14_0_2_um_filter_52_9	3.08067	0.0417582	M1_N
Sphingobacteriales_bacterium_39-19	3.0801	0.0197802	M1_N
Nocardiopsis_ganjiahuensis	3.07986	0.0446704	M1_N
Verticillium_longisporum	3.07489	0.0446704	M1_N
Diaporthe_ampelina	3.07148	0.0463455	M1_N
Golovinomyces_cichoracearum	3.06946	0.004346	M1_N
Betaproteobacteria_bacterium_RIFCSPLOWO2_02_FULL_67_26	-3.06946	0.0010989	M1_N
Extensimonas_perlucida	3.06863	0.042254	M1_G
Porphyrobacter_sp._IPPAS_B-1204	3.06842	0.0131868	M1_N
Salinicola_peritrichatus	3.06821	0.00813374	M1_N
Burkholderia_sp._JKS000303	3.06405	0.0447678	M1_G
Methylobacterium_sp._yr596	3.0591	0.010301	M1_N
Providencia_stuartii	3.05523	0.0446704	M1_N
Rhodoferax_bucti	3.05444	0.0417582	M1_G
Streptomyces_sp._OspMP-M45	3.0473	0.0267349	M1_N
Candidatus_Daviesbacteria_bacterium_RIFCSPLOWO2_01_FULL_43_15	3.04441	0.0336911	M1_N
Isoptericola_halotolerans	3.04396	0.00769231	M1_G
Streptomyces_stelliscabiei	3.04305	0.012655	M1_G
Bacillus_toyonensis	3.04231	0.0446704	M1_G
Pseudomonas_sp._JL972	3.04157	0.0289309	M1_N
bacterium_AM6	3.04017	0.0296703	M1_N
Chromobacterium_violaceum	3.03886	0.0296703	M1_N
Rhodobacteraceae_bacterium_PARR1	3.03549	0.0131868	M1_N
Hypoxylon_sp._EC38	3.02561	0.0267349	M1_N
Enterococcus_hirae	3.0234	0.00813374	M1_N
Paenibacillus_sp._3-5-3	3.01799	0.0446704	M1_N
Drechmeria_coniospora	3.0157	0.00813374	M1_N
Candidatus_Yonathbacteria_bacterium_RIFCSPLOWO2_01_FULL_47_33b	3.01351	0.0446704	M1_G
Candidatus_Cerribacteria_bacterium_Amazon_FNV_2010_28_9	3.01125	0.020275	M1_G
Marinobacter_pelagius	3.00739	0.0417582	M1_N
Flavobacteriales_bacterium	3.00673	0.00769231	M1_G
Porphyrobacter_sp._SLTP	2.99926	0.0131868	M1_N
Streptomyces_sp._ADI98-10	2.99703	0.012655	M1_G
Vampirovibrio_chlorellavorus	2.99392	0.012655	M1_N
Haloactinobacterium_sp._HY044	2.99352	0.0463455	M1_N
Pseudomonas_veronii	2.99189	0.0131868	M1_N
Mycobacterium_phage_Nebkiss	2.99135	0.0267349	M1_N
Acinetobacter_indicus	2.98896	0.00426035	M1_N
Diaphorobacter_polyhydroxybutyrativorans	2.98832	0.0312322	M1_G
Acidovorax_sp._1608163	2.98769	0.0131868	M1_N
Fusarium_heterosporum	2.98672	0.0463455	M1_N
Candidatus_Gastranaerophilales_bacterium	2.98425	0.01455	M1_N
Flavobacterium_sp.	2.97777	0.0010989	M1_N
Verrucomicrobia_bacterium_ADurb.Bin474	2.97399	0.042254	M1_N
Streptomyces_sp._WAC05858	2.9735	0.0177061	M1_G
Microdochium_bolleyi	2.97267	0.0151809	M1_N
Salinicola_peritrichatus	2.97137	0.0446704	M1_G
Pleurotus_platypus	-2.96829	0.000181214	M1_N
Streptomyces_sp._BK161	2.96729	0.0197802	M1_G
Betaproteobacteria_bacterium_RIFCSPLOWO2_02_64_14	-2.96465	0.0010989	M1_N
Kitasatospora_phosalacinea	2.96072	0.0247613	M1_N
TM7_phylum_sp._oral_taxon_346	2.95838	0.00813374	M1_N
Candidatus_Saccharibacteria_bacterium_32-50-10	2.95782	0.0131868	M1_N
Rarobacter_faecitabidus	2.95588	0.0463455	M1_N
Rhizobium_sp._Root1220	2.95145	0.0131868	M1_N
Streptomyces_phage_Blueeyedbeauty	2.94874	0.0278744	M1_N
Streptomyces_phage_Muntaha	2.94188	0.0296703	M1_N
Enterococcus_hirae	2.94119	0.0151809	M1_G
Bradyrhizobium_genosp._SA-3	2.94081	0.0417582	M1_N
Streptomyces_sp._2114.4	2.93782	0.0463455	M1_G
Capybara_virus_37_cap1_578	-2.93449	0.00105795	M1_N
Flavobacterium_rakeshii	2.93214	0.00813374	M1_G
Paracoccus_sulfuroxidans	2.93009	0.0446704	M1_N
Candidatus_Methanofastidiosum_methylthiophilus	2.92839	0.042254	M1_G
Rhizobium_sp._AN6A	2.91924	0.0417582	M1_N
Bilophila_wadsworthia	2.91629	0.0267349	M1_G
Stenotrophomonas_pavanii	2.91556	0.0131868	M1_N
Janthinobacterium_sp.	2.91528	0.0197802	M1_N
Candidatus_Gastranaerophilales_bacterium	2.91521	0.0312322	M1_G
Hypoxylon_sp._CO27-5	2.91181	0.0177061	M1_N
Pseudomonas_kribbensis	2.91169	0.00409199	M1_N
TM7_phylum_sp._oral_taxon_346	2.91067	0.0267349	M1_G
Variovorax_sp._BK151	2.9091	0.0447678	M1_G
candidate_division_WWE3_bacterium_RIFOXYD1_FULL_39_9	2.90903	0.0267349	M1_G
Brevundimonas_diminuta	2.90477	0.0010989	M1_N
Sphingomonas_sp._LK11	2.904	0.0312322	M1_N
Nocardiopsis_ganjiahuensis	2.9031	0.0267349	M1_G
Fusarium_sarcochroum	2.90112	0.0446704	M1_G
Microbacterium_phage_Burro	2.89853	0.0131868	M1_N
Acidovorax_kalamii	2.89604	0.0043956	M1_G
Cloacibacterium_normanense	2.89256	0.0296703	M1_G
Streptomyces_violaceorubidus	2.89213	0.00813374	M1_N
Verrucosispora_sp._NA02020	2.8903	0.0447678	M1_N
Agrobacterium_sp._H13-3	2.88861	0.0043956	M1_N
Candidatus_Heimdallarchaeota_archaeon	2.88776	0.0438213	M1_G
Streptomyces_sp._LUP30	2.88558	0.00813374	M1_N
Streptomyces_violaceorubidus	2.88251	0.0151809	M1_G
Candidatus_Yonathbacteria_bacterium_RIFCSPLOWO2_01_FULL_47_33b	2.88242	0.0446704	M1_N
Xylella_fastidiosa	2.88072	0.0128529	M1_N
Diaphorobacter_sp._HDW4A	2.87492	0.0010989	M1_N
candidate_division_WWE3_bacterium_RIFOXYD1_FULL_39_9	2.87288	0.0267349	M1_N
Hypoxylon_sp._EC38	2.87146	0.0446704	M1_G
Streptomyces_phage_Gilson	2.86031	0.0131868	M1_N
Metarhizium_robertsii	2.85796	0.0446704	M1_G
Flavobacterium_caseinilyticum	2.85211	0.0267349	M1_G
Bdellovibrionales_bacterium_RIFOXYD12_FULL_39_22	2.85085	0.0446704	M1_N
Fusarium_sp._NRRL_66182	2.84877	0.0446704	M1_G
Glaciimonas_sp.	2.84805	0.0197802	M1_G
Absidia_glauca	2.84557	0.0446704	M1_G
Streptomyces_phage_CricKo	2.8446	0.0447678	M1_N
Streptomyces_sp._OspMP-M45	2.84404	0.0267349	M1_G
Cytospora_leucostoma	2.83317	0.00409199	M1_N
Fusarium_sp._AF-6	2.83286	0.0267349	M1_N
Verrucomicrobiae_bacterium_Tous-C4TDCM	2.82999	0.0417582	M1_N
Candidatus_Saccharimonas_aalborgensis	2.82977	0.0296703	M1_N
Actinomadura_kijaniata	2.82543	0.0131868	M1_G
Mesorhizobium_sp._M7D.F.Ca.US.005.01.1.1	2.82242	0.0247613	M1_G
Mycolicibacter_kumamotonensis	2.81775	0.0391059	M1_N
Verticillium_longisporum	2.81733	0.00813374	M1_G
Streptomyces_resistomycificus	2.81599	0.0417582	M1_G
Streptomyces_sp._WAC08401	2.81565	0.010301	M1_G
Candidatus_Roizmanbacteria_bacterium_CG09_land_8_20_14_0_10_41_9	2.81348	0.0446704	M1_G
Arthrobacter_virus_Jasmine	2.81151	0.0131868	M1_N
Sphingomonadales_bacterium_GWF1_63_6	2.80785	0.0312322	M1_N
Janthinobacterium_sp._CG23_2	2.8068	0.0131868	M1_N
Bacillus_toyonensis	2.80583	0.00813374	M1_N
Streptomyces_sp._MBT28	2.80424	0.0197802	M1_G
Novosphingobium_sp._KN65.2	2.80228	0.0131868	M1_N
Acinetobacter_pittii	2.80189	0.0128529	M1_N
Rhodococcus_virus_Poco6	2.79712	0.00409199	M1_N
Acidovorax_kalamii	2.79525	0.0043956	M1_N
Sinorhizobium_meliloti	2.79427	0.0131868	M1_N
Paenibacillus_sp._3-5-3	2.79367	0.0267349	M1_G
Streptomyces_qaidamensis	2.79103	0.0417582	M1_G
Bacillus_benzoevorans	2.79076	0.0446704	M1_N
Caulobacter_phage_RW	2.79066	0.0267349	M1_N
Candidatus_Pacebacteria_bacterium_CG_4_9_14_0_2_um_filter_34_50	2.78756	0.0446704	M1_G
Streptomyces_sp._SAJ15	2.78651	0.012655	M1_G
Fusarium_avenaceum	2.78562	0.0267349	M1_N
Streptomyces_sp._BSE7F	2.78455	0.042254	M1_N
Hyphomonas_sp.	2.78386	0.00769231	M1_N
Bdellovibrionales_bacterium_CG10_big_fil_rev_8_21_14_0_10_45_34	2.78319	0.0312322	M1_G
Betaproteobacteria_bacterium_SG8_41	-2.77741	0.0010989	M1_N
Streptomyces_sp._Tu_2975	2.77609	0.0197802	M1_G
Candidatus_Roizmanbacteria_bacterium_CG09_land_8_20_14_0_10_41_9	2.77449	0.0267349	M1_N
Agrobacterium_vitis	2.77011	0.0010989	M1_N
Streptomyces_phage_Limpid	2.76571	0.010301	M1_N
Marinobacter_sp._es.042	2.7514	0.0296703	M1_N
Roseovarius_sp._THAF9	2.75051	0.00813374	M1_N
Xylella_fastidiosa	2.75049	0.0247613	M1_G
Streptomyces_sp._WAC08401	2.74828	0.01455	M1_N
Golovinomyces_cichoracearum	2.7479	0.0325196	M1_G
Betaproteobacteria_bacterium_RIFCSPLOWO2_12_FULL_62_58	-2.74337	0.0010989	M1_N
Bacteroidetes_bacterium_OLB8	2.74167	0.0463455	M1_G
Acinetobacter_indicus	2.74001	0.0312322	M1_G
Capybara_virus_37_cap1_578	-2.73539	0.00171679	M1_G
Stackebrandtia_nassauensis	2.73232	0.0131868	M1_N
Streptomyces_sp._SID5926	2.73222	0.0447678	M1_G
Pseudomonas_kribbensis	2.72705	0.0151809	M1_G
Flavobacteriales_bacterium_CG18_big_fil_WC_8_21_14_2_50_32_9	2.72459	0.0332993	M1_N
Acinetobacter_junii	2.72423	0.0463455	M1_N
Limnohabitans_sp._Jir72	2.72136	0.0021978	M1_G
Streptomyces_phage_Moab	2.7197	0.00620803	M1_N
Burkholderiales_bacterium_64-34	2.71774	0.0267349	M1_G
Bradyrhizobium_sp._MOS002	2.71593	0.01455	M1_G
Pleurotus_platypus	-2.71194	0.00343249	M1_G
Microbacterium_saccharophilum	2.70945	0.0463455	M1_N
Metarhizium_album	2.70549	0.0267349	M1_N
Parcubacteria_group_bacterium_Gr01-1014_24	2.70455	0.00813374	M1_N
Pseudomonas_formosensis	2.69955	0.0446704	M1_G
Porphyrobacter_sp._CACIAM_03H1	2.69657	0.0043956	M1_N
Bradyrhizobium_sp._MOS002	2.69651	0.0378126	M1_N
Flavobacterium_cyanobacteriorum	2.69619	0.0177061	M1_N
Rhodopseudomonas_sp._BR0C11	2.69559	0.01455	M1_G
Lysobacter_sp._HDW10	2.6948	0.0131868	M1_N
Pseudomonas_oleovorans	2.69335	0.017959	M1_G
Circular_genetic_element_sp.	2.69308	0.0197802	M1_N
Streptomyces_sp._SAJ15	2.69254	0.0438213	M1_N
Streptomyces_sp._SID8499	2.69149	0.00769231	M1_G
Candidatus_Saccharibacteria_bacterium_RIFCSPHIGHO2_02_FULL_47_12	2.68979	0.0417582	M1_N
Streptomyces_sp._AVP053U2	2.68721	0.012655	M1_G
Microbacterium_phage_Count	2.68584	0.00813374	M1_N
Massilia_genomosp._1	2.68196	0.0131868	M1_N
Arthrobacter_phage_Jinkies	2.68124	0.0312322	M1_N
Verrucosispora_sp._SN26_14.1	2.68124	0.0177061	M1_G
Cyanobacteria_bacterium_UBA11049	-2.6812	0.0010989	M1_N
Streptomyces_sp._PSKA28	2.68075	0.0296703	M1_N
Rhizobium_sp._Root491	2.67532	0.0296703	M1_N
Stenotrophomonas_bentonitica	2.6751	0.0131868	M1_N
bacterium_336/3	2.67166	0.0296703	M1_N
Microbacterium_phage_Arete	2.66899	0.0296703	M1_N
Oerskovia_enterophila	2.66877	0.0278744	M1_N
Streptomyces_himastatinicus	2.6686	0.0131868	M1_G
Pseudomonas_mandelii	2.66844	0.0131868	M1_N
Bacteroidetes_bacterium_RIFCSPLOWO2_12_FULL_35_15	2.66795	0.0131868	M1_N
Betaproteobacteria_bacterium_RIFCSPLOWO2_12_FULL_62_13	-2.66585	0.0010989	M1_N
Deminuibacter_soli	2.66558	0.0131868	M1_N
Streptomyces_parvus	2.66419	0.0267349	M1_N
Comamonadaceae_bacterium_CCH4-C5	2.66416	0.0296703	M1_G
Flavobacterium_sp._SG815	2.66342	0.0152183	M1_G
Comamonas_sp._SCN_65-56	2.66058	0.0417582	M1_N
Arthrobacter_sp._AG1021	2.65947	0.00813374	M1_N
Microbacterium_kitamiense	2.65906	0.0417582	M1_N
Microbacterium_sp._LAM7116	2.65749	0.0446704	M1_N
Rhodoferax_sp._IMCC26218	2.65729	0.0021978	M1_N
Pleurotus_eryngii	-2.65713	0.000181214	M1_G
Pleurotus_eryngii	-2.65713	0.000181214	M1_N
Candidatus_Saccharibacteria_bacterium_32-49-10	2.65706	0.00813374	M1_N
Rhodanobacter_glycinis	2.65696	0.0131868	M1_N
Zopfia_rhizophila	2.65294	0.0151809	M1_N
Xanthomonas_albilineans	2.65008	0.0131868	M1_N
Fusarium_poae	2.64793	0.0151809	M1_N
Streptomyces_phage_Kardashian	2.64677	0.0267349	M1_G
Hyphomonas_sp.	2.64025	0.0131868	M1_G
Candidatus_Paracaedibacter_symbiosus	2.63824	0.0446704	M1_N
Streptomyces_sp._LUP30	2.63741	0.0151809	M1_G
Rhodanobacter_sp._SCN_67-45	2.63569	0.0131868	M1_N
Streptomyces_glaucescens	2.63414	0.0197802	M1_G
Sphingobacterium_mizutaii	2.63338	0.0446704	M1_G
Kitasatospora_phosalacinea	2.63255	0.0447678	M1_G
Rhodopseudomonas_sp._BR0C11	2.63188	0.0312322	M1_N
Cellulomonas_gilvus	2.63052	0.0244437	M1_N
Streptomyces_sp._ADI98-10	2.6284	0.0177061	M1_N
Porphyrobacter_sp.	2.62729	0.0417582	M1_N
Trichoderma_citrinoviride	2.62665	0.0267349	M1_N
Streptomyces_sp._1222.2	2.62605	0.0325196	M1_N
Streptomyces_sp._E5N91	2.62544	0.0151809	M1_N
Paracandidimonas_soli	2.62513	0.012655	M1_N
Chitinophaga_sp.	2.62398	0.0417582	M1_N
Microbacterium_phage_Araxxi	2.62307	0.0131868	M1_G
Parcubacteria_group_bacterium_Gr01-1014_24	2.62269	0.0151809	M1_G
Streptomyces_sp._TRM63209	2.62168	0.0151809	M1_N
Gammaproteobacteria_bacterium_RIFCSPHIGHO2_12_FULL_63_22	2.62104	0.0131868	M1_N
Streptomyces_phage_Kardashian	2.62083	0.00813374	M1_N
Clavibacter_virus_CN1A	2.62053	0.0267349	M1_N
Porphyrobacter_sp._TH134	2.6173	0.0296703	M1_N
Weeksella_virosa	2.61624	0.0446704	M1_N
Limnohabitans_sp._T6-5	2.61113	0.0296703	M1_G
Mycobacterium_intracellulare	2.60897	0.0131868	M1_N
Yersinia_kristensenii	2.60787	0.0244437	M1_N
Candidatus_Roizmanbacteria_bacterium_RIFCSPHIGHO2_12_FULL_39_8	2.60522	0.0446704	M1_N
Streptomyces_olivaceus	2.60349	0.0446704	M1_G
Microdochium_bolleyi	2.60305	0.0267349	M1_G
Bacteroides_stercoris	2.60091	0.00409199	M1_N
Dyadobacter_luteus	2.60004	0.0131868	M1_G
Curtobacterium_sp._MCBD17_030	2.59971	0.0446704	M1_N
Candidatus_Woesebacteria_bacterium_RIFCSPLOWO2_01_FULL_44_24b	2.5993	0.0446704	M1_G
Candidatus_Saccharibacteria_bacterium_RAAC3_TM7_1	2.5981	0.00769231	M1_N
Betaproteobacteria_bacterium_RIFCSPLOWO2_02_FULL_62_79	-2.59398	0.0010989	M1_N
Deltaproteobacteria_bacterium_RIFCSPLOWO2_12_55_13	-2.59391	0.0010989	M1_N
Pyricularia_pennisetigena	2.59218	0.0446704	M1_N
Chroococcidiopsis_sp._PCC_6712	2.59188	0.0021978	M1_N
Mortierella_elongata	2.58973	0.0463455	M1_G
Micromonospora_sp._RV43	2.58852	0.0391059	M1_G
Micromonospora_maritima	2.58564	0.0296703	M1_N
Agrobacterium_vitis	2.58488	0.0043956	M1_G
Hypoxylon_sp._CO27-5	2.58288	0.0177061	M1_G
Pseudomonas_oleovorans	2.5823	0.00907602	M1_N
Marinobacter_excellens	2.57971	0.0267349	M1_G
Isoptericola_variabilis	2.57401	0.0417582	M1_N
Trichoderma_asperellum	2.5721	0.0151809	M1_G
Torrubiella_hemipterigena	2.57003	0.0267349	M1_N
Isoptericola_sp._TLY-12	2.56935	0.0417582	M1_G
Stenotrophomonas_humi	2.56802	0.0131868	M1_N
Herbiconiux_solani	2.56673	0.01455	M1_N
Arthrobacter_phage_Richie	2.56331	0.0463455	M1_N
Deltaproteobacteria_bacterium_RIFCSPLOWO2_02_FULL_53_8	2.56151	0.0296703	M1_G
Streptomyces_sp._E5N298	2.55976	0.020275	M1_G
Chryseobacterium_sediminis	2.55871	0.0151809	M1_N
Candidatus_Saccharibacteria_bacterium_32-49-12	2.55833	0.0197802	M1_G
Clavibacter_virus_CN1A	2.55613	0.0446704	M1_G
uncultured_Stenotrophomonas_sp.	2.55439	0.0131868	M1_N
Gammaproteobacteria_bacterium_RIFCSPHIGHO2_12_FULL_40_19	-2.55226	0.0296703	M1_N
Dermatophilaceae_bacterium	2.55222	0.0131868	M1_G
Brevundimonas_sp._LM2	2.54132	0.0131868	M1_N
Pseudactinotalea_suaedae	2.54044	0.01455	M1_N
Marinobacterium_litorale	2.53914	0.0417582	M1_G
Burkholderia_sp._YI23	2.53744	0.00813374	M1_G
Acidovorax_carolinensis	2.53478	0.0131868	M1_N
Oerskovia_enterophila	2.5343	0.01455	M1_G
Vogesella_perlucida	2.53417	0.0267349	M1_G
Colletotrichum_chlorophyti	2.53352	0.0151809	M1_G
Pseudomonas_chlororaphis	2.53346	0.0043956	M1_N
Candidatus_Saccharibacteria_bacterium_HGW-Saccharibacteria-1	2.53294	0.0197802	M1_N
Propionicimonas_paludicola	2.5299	0.0312322	M1_N
Hyaloscypha_bicolor	2.52948	0.0151809	M1_N
Colletotrichum_tofieldiae	2.52324	0.0267349	M1_G
Stenotrophomonas_pictorum	2.52179	0.0131868	M1_N
Streptomyces_sp._111WW2	2.52097	0.0332993	M1_G
Aeromonas_caviae	2.51968	0.0131868	M1_N
Variovorax_sp._YR634	2.51846	0.0131868	M1_N
Thaumarchaeota_archaeon_13_1_40CM_3_50_5	-2.51846	0.00426035	M1_N
Bacteroidetes_bacterium_ADurb.Bin008	2.51825	0.00813374	M1_G
Rhodobacter_sp.	2.51716	0.0043956	M1_N
Hyaloscypha_variabilis	2.51229	0.0267349	M1_N
Stenotrophomonas_sp.	2.5117	0.0131868	M1_N
Sphingomonas_endophytica	2.50912	0.0131868	M1_N
Delftia_sp._RIT313	2.50305	0.0151809	M1_N
Rhodopirellula_bahusiensis	2.50052	0.00769231	M1_N
Novosphingobium_rosa	2.4992	0.0131868	M1_N
Sinorhizobium_phage_ort11	2.49916	0.010301	M1_N
Stenotrophomonas_tumulicola	2.496	0.0131868	M1_N
Candidatus_Izimaplasma_sp._HR2	2.493	0.0151809	M1_N
Chryseobacterium_sediminis	2.49256	0.0267349	M1_G
Streptomyces_sp._Ag109_O5-1	2.48919	0.0197802	M1_N
Rhodoferax_bucti	2.48818	0.0131868	M1_N
Flavonifractor_plautii	2.48604	0.0151809	M1_N
candidate_division_WWE3_bacterium_RIFCSPLOWO2_01_FULL_41_9	2.48315	0.0446704	M1_N
Paraburkholderia_bryophila	2.48179	0.0043956	M1_N
Burkholderia_sp._YI23	2.47975	0.00409199	M1_N
Nitrososphaera_phage_Pro-Nvie1	-2.47895	0.00409199	M1_N
Euryarchaeota_archaeon_SM23-78	2.47839	0.0446704	M1_G
Hypoxylon_sp._CI-4A	2.47674	0.0267349	M1_N
Listeria_monocytogenes	2.47089	0.0463455	M1_G
Candidatus_Lloydbacteria_bacterium_RIFCSPHIGHO2_02_FULL_50_13	2.47073	0.0267349	M1_G
Cupriavidus_metallidurans	2.46972	0.0197802	M1_N
Candidatus_Paracaedibacter_symbiosus	2.46655	0.0267349	M1_G
Chloroflexi_bacterium_RIFCSPLOWO2_12_FULL_71_12	-2.4642	0.004346	M1_N
Verrucosispora_sp._SN26_14.1	2.46384	0.017959	M1_N
Streptomyces_sp._PSKA28	2.45855	0.0417582	M1_G
Actinomadura_kijaniata	2.45813	0.0197802	M1_N
uncultured_beta_proteobacterium_Rifle_16ft_4_minimus_10522	-2.45704	0.00426035	M1_N
Streptomyces_chrestomyceticus	2.45625	0.0463455	M1_N
Paracoccus_sp._1011MAR3C25	2.4561	0.020275	M1_N
Hymenobacter_sp._Fur1	2.45532	0.0197802	M1_N
Rosellinia_necatrix	2.45498	0.0151809	M1_N
Streptomyces_sp._C1-2	2.45103	0.0211227	M1_G
Polaromonas_naphthalenivorans	2.44895	0.0296703	M1_G
uncultured_Chloroflexi_bacterium_HF0200_09I09	-2.448	0.0010989	M1_N
Sphingobium_sp._DC-2	2.44757	0.0131868	M1_N
Streptomyces_mobaraensis	2.44648	0.0151809	M1_N
Anaplasma_phagocytophilum	2.4457	0.0227747	M1_N
Euryarchaeota_archaeon_SM23-78	2.44463	0.0446704	M1_N
Chloroflexi_bacterium_RIFCSPLOWO2_02_FULL_71_16	-2.44426	0.0010989	M1_N
Limnohabitans_sp._Jir72	2.4401	0.0043956	M1_N
Gemmatimonadetes_bacterium_21-71-4	-2.43922	0.0010989	M1_N
Chroococcidiopsis_sp._PCC_6712	2.43848	0.0296703	M1_G
Drechmeria_coniospora	2.43841	0.0151809	M1_G
Sphingobium_barthaii	2.43709	0.0131868	M1_N
Anabaena_sp._YBS01	-2.43622	0.00382007	M1_N
Streptomyces_phage_Daubenski	2.43399	0.0151809	M1_N
Microbacterium_phage_Count	2.43182	0.0151809	M1_G
Mesorhizobium_ciceri	2.4312	0.00769231	M1_N
Acinetobacter_phage_BS46	2.43012	0.0446704	M1_G
Xanthomonas_phaseoli	2.42972	0.0152183	M1_N
Zopfia_rhizophila	2.42892	0.0446704	M1_G
Sphingobacteriia_bacterium_35-40-8	2.42707	0.0267349	M1_N
Streptomyces_olivaceus	2.42563	0.0267349	M1_N
Coniferiporia_sulphurascens	-2.4198	0.000181214	M1_N
Fusobacterium_massiliense	-2.4184	0.00168764	M1_N
Colletotrichum_musicola	2.41814	0.0446704	M1_N
Sphingobacterium_multivorum	2.41647	0.00907602	M1_N
Enterobacter_cloacae	2.41474	0.0010989	M1_N
Pontibacter_sp._2b14	2.41176	0.0296703	M1_N
Paraburkholderia_bryophila	2.41034	0.0417582	M1_G
Streptomyces_sp._wa22	2.41004	0.0463455	M1_N
Tenacibaculum_sp.	2.4059	0.0131868	M1_N
Sphingobium_hydrophobicum	2.40391	0.00813374	M1_N
Streptomyces_sp._C1-2	2.40273	0.0391059	M1_N
Streptomyces_sp._SID8499	2.4025	0.0211227	M1_N
Deinococcus_sp._KR-1	2.40227	0.00813374	M1_N
Marinobacter_aromaticivorans	2.40098	0.0446704	M1_G
Microlunatus_parietis	2.3981	0.0417582	M1_N
Streptomyces_mobaraensis	2.39805	0.0267349	M1_G
Streptomyces_tricolor	2.39733	0.0197802	M1_G
Flavobacteriales_bacterium_CG18_big_fil_WC_8_21_14_2_50_32_9	2.39548	0.0438213	M1_G
Marinilabilia_salmonicolor	2.39476	0.00409199	M1_N
Alphaproteobacteria_bacterium_HGW-Alphaproteobacteria-1	2.39409	0.00769231	M1_G
uncultured_bacterium_12AC_lac13	-2.39144	0.00426035	M1_N
Limnohabitans_sp._2KL-51	2.39135	0.0417582	M1_G
Cupriavidus_metallidurans	2.38756	0.0021978	M1_G
Deminuibacter_soli	2.38747	0.0197802	M1_G
Mesorhizobium_sp._B2-2-3	2.38732	0.0446704	M1_N
Methylobacterium_sp._yr668	2.38717	0.017959	M1_G
Candidatus_Izimaplasma_sp._HR2	2.3853	0.0151809	M1_G
Candidatus_Saccharibacteria_bacterium_32-49-12	2.38506	0.0010989	M1_N
Delftia_sp._RIT313	2.38423	0.0446704	M1_G
bacterium_M00.F.Ca.ET.163.01.1.1	2.38336	0.0151809	M1_N
Brevundimonas_bacteroides	2.37762	0.0021978	M1_N
Sphingobium_sp._B9G3B	2.37403	0.0131868	M1_N
candidate_division_WWE3_bacterium_RIFCSPLOWO2_01_FULL_41_9	2.37234	0.0446704	M1_G
Vogesella_perlucida	2.37202	0.0446704	M1_N
Colletotrichum_gloeosporioides	2.37099	0.0446704	M1_N
Arthrobacter_virus_Sonali	2.36685	0.0211227	M1_N
Novosphingobium_sp._17-62-9	2.36673	0.0010989	M1_N
Monosporascus_sp._CRB-9-2	2.3662	0.0151809	M1_N
Sulfuriferula_thiophila	2.36552	0.0296703	M1_N
Gammaproteobacteria_bacterium_RIFCSPHIGHO2_12_FULL_40_19	-2.36548	0.0296703	M1_G
Streptomyces_sp._TRM63209	2.36535	0.0151809	M1_G
Pyricularia_pennisetigena	2.36064	0.0446704	M1_G
Valsa_sordida	2.35939	0.0446704	M1_N
Tortispora_caseinolytica	2.35888	0.0312322	M1_N
Burkholderiales_bacterium_64-34	2.35822	0.0151809	M1_N
Xanthomonas_campestris	2.35784	0.0131868	M1_N
Bdellovibrionales_bacterium_CG10_big_fil_rev_8_21_14_0_10_45_34	2.35759	0.0312322	M1_N
Candidatus_Lloydbacteria_bacterium_RIFCSPHIGHO2_02_FULL_50_13	2.35032	0.0446704	M1_N
Streptomyces_sp._NRRL_S-146	2.35019	0.0197802	M1_N
Sphingobacteriia_bacterium_35-40-8	2.34996	0.0151809	M1_G
Bacteroides_stercoris	2.3493	0.00813374	M1_G
Acinetobacter_haemolyticus	2.34846	0.01455	M1_G
Massilia_sp._RP-1-19	2.34821	0.0131868	M1_N
Herpetosiphon_sp.	2.34694	0.0289309	M1_N
Trichomonascus_ciferrii	2.34579	0.0446704	M1_N
Streptomyces_sp._NEAU-sy36	2.34566	0.00409199	M1_N
Marinobacter_excellens	2.34258	0.00813374	M1_N
Candidatus_Saccharibacteria_bacterium_RIFCSPHIGHO2_12_FULL_42_8	2.3425	0.0131868	M1_N
Kibdelosporangium_sp._4NS15	2.34165	0.0296703	M1_G
Chloroflexi_bacterium_13_1_40CM_68_21	-2.34142	0.00426035	M1_N
Comamonas_odontotermitis	2.34078	0.0152183	M1_N
Chloroflexi_bacterium_13_1_40CM_3_70_6	-2.33879	0.00426035	M1_N
Laribacter_hongkongensis	2.33814	0.0043956	M1_G
Stenotrophomonas_koreensis	2.33683	0.0131868	M1_N
Streptomyces_phage_Madamato	2.33662	0.0227747	M1_N
Hymenobacter_sp._Fur1	2.33617	0.0417582	M1_G
Bradyrhizobium_sp._URHA0002	-2.33602	0.0010989	M1_G
Euryarchaeota_archaeon_RBG_19FT_COMBO_69_17	-2.33007	0.00426035	M1_N
Paenibacillus_polymyxa	2.32981	0.020275	M1_N
Massilia_sp._CCM_8734	2.32407	0.0197802	M1_N
Streptomyces_sp._EN16	2.32352	0.0197802	M1_G
Paenibacillus_koleovorans	2.32198	0.012655	M1_N
Limnohabitans_sp._T6-5	2.32184	0.0296703	M1_N
Grosmannia_clavigera	2.31573	0.0267349	M1_N
Chloroflexi_bacterium_GWC2_70_10	-2.31479	0.0010989	M1_N
Massilia_violaceinigra	2.31189	0.0131868	M1_N
Hahella_sp._CCB-MM4	2.3105	0.0197802	M1_N
Betaproteobacteria_bacterium_RIFCSPLOWO2_02_67_12	-2.30835	0.0010989	M1_N
Streptomyces_phage_LibertyBell	2.30802	0.01455	M1_N
Chloroflexi_bacterium_13_1_40CM_67_9	-2.30727	0.00426035	M1_N
uncultured_bacterium_888	-2.30155	0.0010989	M1_N
Isoptericola_chiayiensis	2.30049	0.0463455	M1_N
Pseudomonas_sp.	2.29978	0.0131868	M1_N
Comamonas_odontotermitis	2.29898	0.0152183	M1_G
Deltaproteobacteria_bacterium_13_1_40CM_4_54_4	-2.29761	0.004346	M1_N
Colletotrichum_graminicola	2.29655	0.0446704	M1_N
Sphingomonas_sp._Leaf32	2.29558	0.0417582	M1_N
Streptomyces_sp._f150	2.29446	0.0151809	M1_G
Streptomyces_parvus	2.29433	0.0267349	M1_G
Bradyrhizobium_sp._URHA0002	-2.29412	0.0010989	M1_N
Acinetobacter_phage_BS46	2.29268	0.0151809	M1_N
Scytalidium_lignicola	2.29067	0.0151809	M1_N
Candidatus_Saccharibacteria_bacterium_GW2011_GWC2_48_9	2.28805	0.0336911	M1_N
Xylaria_multiplex	2.28656	0.0267349	M1_N
Chloroflexi_bacterium_13_1_40CM_4_68_4	-2.28592	0.0010989	M1_N
Blautia_obeum	2.2859	0.0446704	M1_N
Sphingobium_sp._B9G3B	2.28484	0.0131868	M1_G
Paraburkholderia_steynii	2.28455	0.0131868	M1_N
Algibacter_aestuarii	-2.28441	0.00409199	M1_N
Hyaloscypha_bicolor	2.28372	0.0151809	M1_G
Nonomuraea_sp._PA05	2.28357	0.0417582	M1_G
Fusarium_poae	2.28334	0.0446704	M1_G
Streptomyces_silvensis	2.28314	0.00813374	M1_G
Thaumarchaeota_archaeon	-2.27997	0.0021978	M1_N
Streptomyces_sp._NEAU-sy36	2.27899	0.00813374	M1_G
Betaproteobacteria_bacterium_RBG_16_66_20	-2.27892	0.0010989	M1_N
Paenarthrobacter_sp._MSM-2-10-13	2.27823	0.0152183	M1_N
Burkholderiales_bacterium_39-55-53	2.27712	0.0417582	M1_G
Grosmannia_clavigera	2.27677	0.0151809	M1_G
Laccaria_amethystina	-2.27634	0.0010989	M1_G
Massilia_plicata	2.27018	0.012655	M1_N
Komagataeibacter_maltaceti	2.26975	0.00813374	M1_N
Cordyceps_sp._RAO-2017	2.26954	0.0446704	M1_G
Deltaproteobacteria_bacterium_RIFCSPLOWO2_02_FULL_53_8	2.26873	0.0043956	M1_N
Metarhizium_brunneum	2.26791	0.0446704	M1_N
Xanthomonas_phage_Xoo-sp13	2.26742	0.00813374	M1_N
Arthrospira_platensis	2.26412	0.012655	M1_N
Lysobacter_sp._Root667	2.26229	0.0417582	M1_N
[Eubacterium]_rectale	2.26107	0.00409199	M1_N
Sphingobium_sp._DC-2	2.26037	0.0197802	M1_G
Pyricularia_sp._CBS_133598	2.25983	0.0267349	M1_N
Stenotrophomonas_sp._ATCM1_4	2.25882	0.0131868	M1_N
Leifsonia_shinshuensis	2.25736	0.0417582	M1_N
Rosellinia_necatrix	2.25635	0.0446704	M1_G
Deltaproteobacteria_bacterium_RIFCSPLOWO2_12_FULL_60_19	-2.25546	0.0010989	M1_N
Rhizobium_sp._SJZ105	2.25139	0.00813374	M1_N
Mycolicibacterium_conceptionense	2.25021	0.0417582	M1_N
Acidovorax_sp._T1	2.24861	0.0446704	M1_N
Streptomyces_sp._A7024	2.24755	0.0417582	M1_N
Myroides_odoratimimus	2.2471	0.0446704	M1_G
Hahella_chejuensis	2.24705	0.0417582	M1_N
Pseudomonadales_bacterium_RIFCSPLOWO2_02_FULL_63_210	-2.24593	0.0010989	M1_N
Comamonadaceae_bacterium_PBBC2	2.24376	0.0417582	M1_G
Betaproteobacteria_bacterium_RIFCSPLOWO2_12_FULL_63_13	-2.24173	0.0010989	M1_N
Chloroflexi_bacterium_13_1_20CM_2_70_9	-2.2412	0.00426035	M1_N
Colletotrichum_nymphaeae	2.23982	0.0446704	M1_N
Choiromyces_venosus	-2.2397	0.00409199	M1_N
Betaproteobacteria_bacterium_RIFCSPLOWO2_02_FULL_66_14	-2.23861	0.0010989	M1_N
Cordyceps_militaris	2.2374	0.0151809	M1_N
Betaproteobacteria_bacterium_RIFCSPLOWO2_12_FULL_67_28	-2.23697	0.0010989	M1_N
Streptomyces_sp._351MFTsu5.1	2.23512	0.0296703	M1_G
uncultured_Alphaproteobacteria_bacterium	2.23475	0.0446704	M1_N
Streptomyces_silvensis	2.23146	0.00813374	M1_N
Saccharopolyspora_antimicrobica	2.23097	0.0417582	M1_N
Streptomyces_sp._f150	2.22946	0.0267349	M1_N
Streptomyces_sp._CdTB01	2.22876	0.01455	M1_N
Ralstonia_sp._MD27	2.22854	0.0151809	M1_N
Flavobacterium_beibuense	2.2283	0.0128529	M1_N
Candidatus_Nitrosocosmicus_sp._SS	-2.2271	0.0021978	M1_N
Candidatus_Uhrbacteria_bacterium_CG10_big_fil_rev_8_21_14_0_10_48_11	2.22669	0.0446704	M1_G
Actinopolyspora_xinjiangensis	2.22458	0.042254	M1_G
Rhizobium_ecuadorense	2.22442	0.00813374	M1_N
Caulobacter_virus_CcrPW	2.22403	0.0446704	M1_N
Hyaloscypha_variabilis	2.22365	0.0267349	M1_G
Fusobacterium_massiliense	-2.22026	0.00343249	M1_G
Micrococcales_bacterium_73-15	2.21846	0.0151809	M1_N
Mycobacterium_phage_Cookies	-2.21808	0.00233455	M1_N
Rhodanobacter_sp._SCN_67-45	2.21509	0.0296703	M1_G
uncultured_Flavonifractor_sp.	2.21494	0.00813374	M1_N
Ophiostoma_piceae	2.21294	0.0267349	M1_N
TM7_phylum_sp._oral_taxon_352	2.21265	0.0312322	M1_G
Fluviicola_sp._XM-24bin1	-2.21129	0.0010989	M1_N
Daldinia_sp._EC12	2.21124	0.0267349	M1_N
Niabella_aurantiaca	2.21015	0.0296703	M1_N
Laccaria_amethystina	-2.20901	0.0010989	M1_N
Colletotrichum_sojae	2.20468	0.0446704	M1_N
Brevibacterium_linens	2.20306	0.0151809	M1_N
Komagataeibacter_maltaceti	2.20296	0.0267349	M1_G
Microbacterium_phage_Burro	2.202	0.0131868	M1_G
Cadophora_sp._DSE1049	2.20049	0.0446704	M1_N
Chryseobacterium_sp._2VB	2.19774	0.0267349	M1_N
Streptomyces_sp._W9	2.19736	0.010301	M1_G
Candidatus_Accumulibacter_sp._BA-91	2.19591	0.00769231	M1_G
Nitrososphaeraceae_archaeon	-2.19381	0.0010989	M1_N
Arthrospira_platensis	2.19341	0.017959	M1_G
Lipomyces_starkeyi	2.19276	0.0227747	M1_N
Chitinophaga_pinensis	2.19065	0.0197802	M1_N
Salana_multivorans	2.18897	0.0332993	M1_N
Streptomyces_phage_Wakanda	2.18802	0.0244437	M1_N
Deltaproteobacteria_bacterium_RIFCSPHIGHO2_02_FULL_60_17	-2.18756	0.0010989	M1_N
Lautropia_sp._SCN_70-15	-2.18516	0.0010989	M1_N
Nitrososphaerales_archaeon	-2.18412	0.0021978	M1_N
Nitrososphaera_phage_Pro-Nvie1	-2.18304	0.00426035	M1_G
Xanthomonas_sp._GPE_39	2.18156	0.0296703	M1_G
Nocardiopsis_sp._TNDT3	2.18127	0.00813374	M1_N
SAR202_cluster_bacterium_Io17-Chloro-G9	-2.18055	0.0010989	M1_N
Candidatus_Woesebacteria_bacterium_GW2011_GWB1_45_5	2.18012	0.0267349	M1_G
Undibacterium_sp._CY22W	2.17782	0.0043956	M1_G
Leeuwenhoekiella_sp.	2.17737	0.0296703	M1_N
Candidatus_Nitrosocaldus_cavascurensis	-2.17538	0.0010989	M1_N
Gilliamella_apicola	2.17491	0.0452426	M1_N
Nocardioides_sp._ZJ1313	2.17083	0.0131868	M1_N
Candidatus_Rokubacteria_bacterium_RIFCSPLOWO2_02_FULL_68_19	-2.17018	0.0010989	M1_N
Xanthomonadaceae_bacterium_SCN_69-48	2.16926	0.0131868	M1_N
Golovinomyces_magnicellulatus	2.16559	0.0267349	M1_N
Choiromyces_venosus	-2.16541	0.00426035	M1_G
Marinilabilia_salmonicolor	2.16486	0.0267349	M1_G
Ideonella_dechloratans	2.16475	0.0043956	M1_N
Ruminiclostridium_sufflavum	2.16449	0.0446704	M1_N
Pseudomonas_chlororaphis	2.1644	0.0296703	M1_G
Candidatus_Rokubacteria_bacterium_RIFCSPHIGHO2_02_FULL_69_13	-2.16258	0.00426035	M1_N
Acidovorax_sp._HDW3	2.16199	0.00769231	M1_G
Thiotrichales_bacterium_HS_08	2.16091	0.00769231	M1_N
Betaproteobacteria_bacterium_RIFCSPLOWO2_02_FULL_67_19	-2.16022	0.0010989	M1_N
Thermotoga_sp._TBYP3.1.4.1	-2.16002	0.0010989	M1_N
Trichoderma_citrinoviride	2.15981	0.0446704	M1_G
Streptomyces_pini	2.15844	0.0227747	M1_N
Rubritalea_squalenifaciens	2.15831	0.00620803	M1_N
Mesorhizobium_ciceri	2.15627	0.00769231	M1_G
Gordonia_westfalica	2.15333	0.0267349	M1_G
candidate_division_TM7_genomosp._GTL1	2.1529	0.0296703	M1_N
Candidatus_Nitrosocosmicus_arcticus	-2.15272	0.00632318	M1_N
Candidatus_Rokubacteria_bacterium_GWF2_70_14	-2.15267	0.0010989	M1_N
Tetraselmis_viridis_virus_SI1	2.15145	0.0446704	M1_N
Streptomyces_sp._JV178	2.15128	0.0446704	M1_N
Pseudoxanthomonas_sp._NML130969	2.14933	0.0152183	M1_N
Siphonobacter_sp._BAB-5385	2.14879	0.0131868	M1_G
Streptomyces_sp._PIP175	2.14865	0.0267349	M1_G
Sinorhizobium_meliloti	2.14842	0.00769231	M1_G
Xanthomonas_sp._GPE_39	2.14835	0.0131868	M1_N
Streptomyces_sp._HGB0020	2.14811	0.0131868	M1_G
Nocardia_phage_NTR1	2.14744	0.0446704	M1_N
Candidatus_Woesebacteria_bacterium_RIFCSPLOWO2_01_FULL_39_23	2.1473	0.0267349	M1_G
Rhodococcus_virus_Poco6	2.14694	0.0446704	M1_G
Coniferiporia_sulphurascens	-2.14441	0.00293063	M1_G
Oidiodendron_maius	2.14377	0.0463455	M1_N
Oleibacter_marinus	2.14299	0.0267349	M1_N
uncultured_Acidobacteria_bacterium_cosmid_p2H8	-2.14226	0.00426035	M1_N
Actinopolyspora_erythraea	2.13834	0.0131868	M1_N
Mesorhizobium_sp._B2-2-3	2.13683	0.0151809	M1_G
Streptomyces_virus_Mildred21	2.13426	0.00813374	M1_N
Limnohabitans_sp._2KL-51	2.13352	0.0131868	M1_N
Streptomyces_sp._DUT11	2.1328	0.0151809	M1_N
Rhodopirellula_bahusiensis	2.13035	0.0296703	M1_G
Candidatus_Saccharibacteria_bacterium_RIFCSPHIGHO2_12_FULL_41_12	2.13004	0.0197802	M1_N
Streptomyces_sp._wa22	2.12922	0.01455	M1_G
Candidatus_Nitrosocosmicus_franklandus	-2.1268	0.00769231	M1_N
Novosphingobium_sp._17-62-9	2.1263	0.0021978	M1_G
Tenacibaculum_sp.	2.12595	0.0296703	M1_G
Streptomyces_sp._AA4	-2.12468	0.0010989	M1_N
Candidatus_Nitrososphaera_gargensis	-2.12388	0.0021978	M1_N
Bacteroidetes_bacterium_ADurb.Bin397	2.12378	0.0296703	M1_G
Candidatus_Woesebacteria_bacterium_GW2011_GWB1_45_5	2.12165	0.0446704	M1_N
Coniella_lustricola	2.12114	0.0267349	M1_N
Marinobacter_aromaticivorans	2.12033	0.0446704	M1_N
Candidatus_Uhrbacteria_bacterium_CG10_big_fil_rev_8_21_14_0_10_48_11	2.11887	0.0267349	M1_N
Candidatus_Rokubacteria_bacterium_GWC2_70_16	-2.11712	0.0010989	M1_N
Pontibacter_sp._HB172049	2.11694	0.0417582	M1_G
Betaproteobacteria_bacterium_RIFCSPLOWO2_12_FULL_64_23	-2.1168	0.0010989	M1_N
Acidovorax_virus_ACP17	2.11536	0.0267349	M1_G
Nocardioides_sp._SLBN-35	2.11238	0.0131868	M1_N
Ralstonia_sp._MD27	2.11182	0.0151809	M1_G
Coprinellus_angulatus	2.11171	0.0267349	M1_N
Pedobacter_sp._BS3	2.11159	0.0131868	M1_N
Mycolicibacterium_rhodesiae	-2.11129	0.0010989	M1_N
Bizionia_myxarmorum	-2.10927	0.0010989	M1_N
Falsochrobactrum_ovis	2.10844	0.0151809	M1_N
Candidatus_Rokubacteria_bacterium_GWC2_70_24	-2.1077	0.00426035	M1_N
Betaproteobacteria_bacterium_RIFCSPLOWO2_02_FULL_68_150	-2.10637	0.0010989	M1_N
Streptomyces_sp._GY16	2.1055	0.0267349	M1_N
Nitrospira_japonica	-2.10453	0.0010989	M1_N
Chitinophaga_arvensicola	2.10365	0.0197802	M1_N
Chryseobacterium_sp._2VB	2.10233	0.0446704	M1_G
Xanthomonas_sp._NCPPB_1128	2.0993	0.0131868	M1_N
Planctomycetes_bacterium_GWF2_42_9	2.09929	0.0447678	M1_N
Nitrospira_sp._CR1.3	-2.09907	0.0010989	M1_N
Falsochrobactrum_ovis	2.09887	0.0267349	M1_G
Nitrospira_sp._KM1	-2.09661	0.0010989	M1_N
Thioalkalivibrio_sp._ALE12	2.09628	0.042254	M1_G
Leeuwenhoekiella_sp._ZYFB001	2.09588	0.0378126	M1_G
Arthrobacter_sp._AG1021	2.09522	0.0267349	M1_G
Streptomyces_bauhiniae	2.09383	0.0131868	M1_N
Betaproteobacteria_bacterium_RIFCSPLOWO2_02_FULL_65_24	-2.09333	0.0010989	M1_N
Streptomyces_seoulensis	2.09154	0.0197802	M1_G
Ensifer_sojae	2.09117	0.0131868	M1_N
Nitrososphaera_sp._AFS	-2.09023	0.00892378	M1_N
Agrobacterium_sp._719_389	2.09009	0.0267349	M1_G
Arthrobacter_sp._GMC3	2.08982	0.0267349	M1_N
Alphaproteobacteria_bacterium_13_1_20CM_3_64_12	-2.08775	0.0010989	M1_N
Colletotrichum_fructicola	2.08691	0.042254	M1_N
Providencia_rettgeri	2.0852	0.0152183	M1_N
Undibacterium_sp._CY22W	2.0829	0.0010989	M1_N
Candidatus_Rokubacteria_bacterium_RIFCSPLOWO2_12_FULL_71_19	-2.08288	0.0010989	M1_N
Streptomyces_sp._NRRL_F-5135	2.08253	0.0417582	M1_G
Valsa_sordida	2.08036	0.0446704	M1_G
Flavobacterium_sp._LaA7.5	2.08034	0.012655	M1_G
Comamonas_sp._NLF-7-7	2.07889	0.00769231	M1_N
bacterium_M00.F.Ca.ET.163.01.1.1	2.07645	0.0151809	M1_G
Pseudactinotalea_suaedae	2.07335	0.0312322	M1_G
Stenotrophomonas_sp._WZN-1	2.07313	0.0151809	M1_N
Actinomadura_sp._WMMA1423	2.07234	0.0296703	M1_G
Stenotrophomonas_bentonitica	2.07144	0.0296703	M1_G
Ensifer_sojae	2.07126	0.0417582	M1_G
candidate_division_NC10_bacterium_RIFCSPLOWO2_02_FULL_66_22	-2.07122	0.0010989	M1_N
Sorangiineae_bacterium_NIC37A_2	2.07115	0.0131868	M1_N
Rhodovarius_lipocyclicus	2.07039	0.00907602	M1_N
Microbacterium_phage_Kelcole	2.06894	0.010301	M1_N
Pseudomonas_fragi	2.06777	0.00769231	M1_N
Lactobacillus_jensenii	-2.06567	0.0010989	M1_N
Rugamonas_sp._FT81W	2.06381	0.0244437	M1_N
Streptomyces_sp._TLI_185	2.06321	0.0332993	M1_N
Actinoplanes_phage_phiAsp2	-2.06102	0.0122634	M1_G
Zhihengliuella_halotolerans	2.06027	0.0244437	M1_N
Monosporascus_sp._CRB-9-2	2.05831	0.0446704	M1_G
Nitrososphaera_viennensis	-2.05775	0.00620803	M1_N
Streptomyces_sp._alain-838	2.05768	0.0267349	M1_N
Streptacidiphilus_sp._P02-A3a	2.05714	0.0131868	M1_G
Paraburkholderia_sp._BL25I1N1	-2.05704	0.0010989	M1_N
Candidatus_Rokubacteria_bacterium_RIFCSPLOWO2_12_FULL_69_21	-2.05696	0.0010989	M1_N
Nocardia_thailandica	2.05594	0.0325196	M1_N
Aminobacter_sp._MSH1	2.0558	0.0197802	M1_N
Novosphingobium_sp._ST904	2.05484	0.0131868	M1_N
Sphingobium_barthaii	2.05472	0.0417582	M1_G
Streptomyces_phage_GirlPower	2.05412	0.042254	M1_N
Formosa_sp._Hel1_33_131	2.05401	0.0151809	M1_N
Streptomyces_yokosukanensis	2.05283	0.0438213	M1_N
Massilia_plicata	2.05271	0.0438213	M1_G
Streptomyces_seoulensis	2.05258	0.0417582	M1_N
Rhizobium_sp._BK251	2.05242	0.00769231	M1_N
Nocardioides_sp._SLBN-35	2.05047	0.0417582	M1_G
Nocardiopsis_sp._TNDT3	2.04987	0.0446704	M1_G
Paraburkholderia_steynii	2.04748	0.0417582	M1_G
Rhizobium_ecuadorense	2.04589	0.0446704	M1_G
Sphingobium_bisphenolivorans	2.04398	0.0197802	M1_G
Formosa_sp._Hel1_33_131	2.04377	0.0446704	M1_G
Candidatus_Rokubacteria_bacterium_13_1_20CM_2_69_58	-2.0429	0.0010989	M1_N
Ophiostoma_piceae	2.04282	0.0267349	M1_G
Streptomyces_sp._IBTA2	2.04266	0.0267349	M1_G
Gordonia_phage_OhMyWard	2.04189	0.0267349	M1_N
Saccharothrix_violaceirubra	2.04173	0.0131868	M1_N
Xanthomonas_sp._JAI131	2.04161	0.0131868	M1_N
Massilia_sp._KIM	2.04067	0.0417582	M1_N
Niveispirillum_cyanobacteriorum	2.04039	0.0296703	M1_N
Colletotrichum_simmondsii	2.03886	0.0446704	M1_N
Demequina_oxidasica	2.03851	0.00813374	M1_G
Blastomonas_sp._AAP25	2.03688	0.0010989	M1_N
Halomonas_lionensis	2.03558	0.0391059	M1_N
Stenotrophomonas_acidaminiphila	2.03424	0.0197802	M1_N
Candidatus_Rokubacteria_bacterium_CSP1-6	-2.0342	0.0010989	M1_N
bacterium_AMD01	2.03362	0.0211227	M1_N
Rhodovarius_lipocyclicus	2.03357	0.0332993	M1_G
Polaromonas_naphthalenivorans	2.03275	0.0417582	M1_N
Novosphingobium_sp._TCA1	2.03266	0.0021978	M1_N
Streptomyces_sp._NRRL_S-146	2.03194	0.0131868	M1_G
Flavobacterium_johnsoniae	2.03192	0.0131868	M1_G
Saccharothrix_violaceirubra	2.03182	0.0417582	M1_G
Brevundimonas_bacteroides	2.02927	0.0043956	M1_G
Anaerolineae_bacterium_SG8_19	-2.02917	0.0010989	M1_N
Acinetobacter_towneri	-2.02616	0.0010989	M1_N
Sphingobium_bisphenolivorans	2.02593	0.0131868	M1_N
Caulobacter_sp._RHG1	2.02348	0.0417582	M1_N
Isoptericola_sp._CG_20/1183	2.02237	0.0446704	M1_N
Caballeronia_glebae	2.02004	0.0131868	M1_N
Holophaga_sp.	2.02004	0.0296703	M1_G
Plantibacter_sp._M259	2.0196	0.0151809	M1_N
Betaproteobacteria_bacterium_RIFCSPLOWO2_02_FULL_67_26	-2.01895	0.0010989	M1_G
Oerskovia_sp._Root918	2.01874	0.0267349	M1_N
Candidatus_Cloacimonetes_bacterium_4572_55	2.01813	0.0391059	M1_G
Chitinophaga_dinghuensis	2.01773	0.0296703	M1_N
Arthrobacter_phage_LittleTokyo	2.01713	0.0446704	M1_N
Novosphingobium_chloroacetimidivorans	2.0167	0.0417582	M1_N
Streptomyces_sp._MNP-20	2.01641	0.0010989	M1_G
Torrubiella_hemipterigena	2.01583	0.0151809	M1_G
Pseudogymnoascus_sp._VKM_F-4518_(FW-2643)	2.01529	0.0446704	M1_N
Streptomyces_sp._rh34	2.01266	0.0296703	M1_G
Colwellia_echini	2.01104	0.012655	M1_N
[Clostridium]_ultunense	-2.01024	0.00426035	M1_N
Acidobacteria_bacterium_RIFCSPLOWO2_12_FULL_67_14b	-2.01021	0.0010989	M1_N
Aeromonas_dhakensis	-2.00995	0.0010989	M1_N
Endozoicomonas_montiporae	2.00956	0.0296703	M1_N
Gemmatimonadetes_bacterium_13_2_20CM_2_69_23	-2.00902	0.0010989	M1_N
Streptomyces_phage_Bmoc	2.00886	0.0151809	M1_N
Pseudomonas_alcaligenes	2.00875	0.0131868	M1_N
Bradyrhizobium_sp._ORS_278	2.00867	0.0197802	M1_N
Arthrobacter_sp._PAMC_25486	2.00744	0.0267349	M1_N
Betaproteobacteria_bacterium_SG8_39	-2.00733	0.0010989	M1_N
Cadophora_sp._DSE1049	2.00544	0.0446704	M1_G
Actinobacteria_bacterium_IMCC26256	-2.00286	0.0010989	M1_N
Pseudomonas_xinjiangensis	2.00274	0.0131868	M1_N
Betaproteobacteria_bacterium_RIFCSPLOWO2_02_FULL_62_17	-2.0022	0.0010989	M1_N
Arthrobacter_sp._MYb211	2.00202	0.01455	M1_N
Pontibacter_sp._HB172049	2.0017	0.0197802	M1_N
Betaproteobacteria_bacterium_RIFCSPLOWO2_12_FULL_65_110	-2.00094	0.0010989	M1_N
Candidatus_Nitrosocosmicus_exaquare	-2.0006	0.00632318	M1_N
Planctomycetes_bacterium_TMED75	2.00034	0.0131868	M1_N
Novosphingobium_piscinae	1.99873	0.0131868	M1_N
Siphonobacter_sp._BAB-5385	1.99797	0.00769231	M1_N
Streptomyces_sp._FBKL.4005	1.99796	0.0151809	M1_N
Xylaria_longipes	1.99535	0.0151809	M1_N
Gammaproteobacteria_bacterium_BRH_c0	1.99518	0.0296703	M1_N
Sphingomonas_aquatilis	1.99507	0.00907602	M1_N
Sphingobium_sp._Leaf26	1.99331	0.0021978	M1_N
Deinococcales_bacterium	1.993	0.0010989	M1_N
Desulfovibrio_carbinoliphilus	1.99263	0.0289309	M1_N
Solemya_velesiana_gill_symbiont	-1.99253	0.0010989	M1_N
Pyricularia_sp._CBS_133598	1.99206	0.0267349	M1_G
Chitinophaga_arvensicola	1.99203	0.0417582	M1_G
Rhodococcus_phage_Toil	1.98984	0.0278744	M1_N
Persephonella_marina	-1.98749	0.004346	M1_N
Pseudoxanthomonas_sp.	1.98622	0.0131868	M1_N
Streptomyces_sp._Amel2xC10	1.98598	0.0447678	M1_G
Kordiimonadales_bacterium_JCM_17846	1.98351	0.0463455	M1_N
Opitutaceae_bacterium_BACL24_MAG-120322-bin51	1.98302	0.0446704	M1_N
Nocardiopsis_salina	1.98282	0.0446704	M1_G
Betaproteobacteria_bacterium_RIFCSPHIGHO2_12_FULL_69_13	-1.98229	0.0010989	M1_N
Mycobacterium_phage_Cookies	-1.9814	0.00813374	M1_G
uncultured_bacterium_CSL132	-1.98118	0.00409199	M1_N
Streptomyces_phage_FidgetOrca	1.979	0.0267349	M1_N
Rubritalea_squalenifaciens	1.97832	0.00426035	M1_G
Streptomyces_sp._YIM_121038	1.97785	0.0296703	M1_G
Betaproteobacteria_bacterium_RIFCSPLOWO2_12_FULL_68_19	-1.9776	0.0010989	M1_N
Candidatus_Nitrososphaera_evergladensis	-1.97726	0.0021978	M1_N
Venustampulla_echinocandica	1.97562	0.0267349	M1_N
Streptomyces_sp._MNP-20	1.97528	0.0391059	M1_N
Thermus_tengchongensis	1.97499	0.0131868	M1_N
Tibeticola_sediminis	1.97448	0.0043956	M1_G
Vibrio_alginolyticus	1.97337	0.004346	M1_N
Candidatus_Saccharibacteria_bacterium_RIFCSPLOWO2_02_FULL_46_7	1.97309	0.01455	M1_G
Candidatus_Nitrosocosmicus_oleophilus	-1.97238	0.0128529	M1_N
Eubacterium_sp.	1.97236	0.0446704	M1_G
Pseudomonas_salegens	1.97227	0.0463455	M1_N
Brevundimonas_sp._LM2	1.97213	0.0131868	M1_G
Streptomyces_sp._BK329	1.9718	0.0227747	M1_N
Actinobacteria_bacterium_RBG_19FT_COMBO_70_19	-1.97177	0.0010989	M1_N
Acidovorax_virus_ACP17	1.97098	0.00409199	M1_N
Limnohabitans_sp._Hippo4	1.97097	0.00769231	M1_G
Gemmatimonas_sp._13_1_20CM_3_60_15	-1.97084	0.004346	M1_N
Corynebacterium_diphtheriae	-1.97083	0.0010989	M1_N
Mesorhizobium_sp._M8A.F.Ca.ET.173.01.1.1	1.97001	0.0332993	M1_N
Microbacteriaceae_bacterium	1.9698	0.0296703	M1_G
Bacteroides_graminisolvens	1.96941	0.017959	M1_G
Pseudomonas_brassicacearum	1.96934	0.0131868	M1_N
Alphaproteobacteria_bacterium_HGW-Alphaproteobacteria-1	1.96911	0.0021978	M1_N
Streptomyces_sp._BK208	1.96884	0.0131868	M1_N
Amycolatopsis_pretoriensis	1.96806	0.0296703	M1_N
Drechslerella_brochopaga	1.9665	0.0197802	M1_N
Chromobacterium_rhizoryzae	1.96506	0.0197802	M1_G
Verrucomicrobium_sp._BvORR034	1.96461	0.0010989	M1_N
Providencia_rettgeri	1.96441	0.0289309	M1_G
Novosphingobium_sp._SG726	1.96356	0.0267349	M1_N
Polynucleobacter_sp._39-46-10	1.96221	0.0267349	M1_N
Thioalkalivibrio_sp._ALE12	1.96171	0.020275	M1_N
Nitrososphaera_sp.	-1.96153	0.0021978	M1_N
Candidatus_Rokubacteria_bacterium_RIFCSPLOWO2_02_FULL_71_18	-1.9557	0.004346	M1_N
bacterium_HR12	-1.95421	0.0010989	M1_N
Streptomyces_sp._DUT11	1.95261	0.0446704	M1_G
Pseudomonas_nosocomialis	1.95196	0.0131868	M1_N
Comamonas_aquatica	1.95164	0.0131868	M1_N
Pseudomonas_daroniae	1.95099	0.0152183	M1_N
Betaproteobacteria_bacterium_RIFCSPLOWO2_12_FULL_68_20	-1.95076	0.0010989	M1_N
Burkholderia_virus_KL1	1.94831	0.0267349	M1_G
Betaproteobacteria_bacterium_RBG_16_64_18	-1.94761	0.0010989	M1_N
Candidatus_Nitrosocosmicus_sp.	-1.94758	0.00892378	M1_N
Microbacterium_sp._BK664	1.9469	0.0446704	M1_N
Comamonas_sp._NLF-7-7	1.94687	0.0417582	M1_G
Cryobacterium_sp._Y62	1.94626	0.0267349	M1_N
Sphingobium_sp._HDIP04	1.94514	0.0247613	M1_N
Planctomycetes_bacterium_Pan161	1.94478	0.0197802	M1_G
Chloroflexi_bacterium_RBG_16_70_13	-1.94417	0.0010989	M1_N
Streptomyces_sp._WAC_04229	1.94256	0.0152183	M1_G
Marinobacter_santoriniensis	1.94234	0.0267349	M1_G
Candidatus_Magasanikbacteria_bacterium_RIFCSPHIGHO2_02_FULL_50_9b	1.94219	0.0446704	M1_N
Actinobacteria_bacterium_13_1_40CM_2_66_13	-1.94174	0.004346	M1_N
Cellulosimicrobium_sp._SL-1	1.94138	0.0151809	M1_N
Anabaena_sp._YBS01	-1.94109	0.00409199	M1_G
Tricholoma_bakamatsutake	-1.94044	0.00105795	M1_G
Sapientia_aquatica	1.9404	0.0197802	M1_G
Candidatus_Rokubacteria_bacterium_GWA2_70_23	-1.93917	0.0010989	M1_N
Betaproteobacteria_bacterium_RIFCSPLOWO2_12_FULL_62_13b	-1.93864	0.0010989	M1_N
Streptomyces_yokosukanensis	1.93835	0.0332993	M1_G
Sphingomonadaceae_bacterium_3R27C6	1.9378	0.0010989	M1_N
Deinococcus_peraridilitoris	1.93773	0.0296703	M1_N
Planctomycetes_bacterium_V22	1.93726	0.0296703	M1_N
Flavobacterium_alkalisoli	1.93709	0.010301	M1_N
Xanthomonas_campestris	1.93584	0.0131868	M1_G
Xanthomonas_arboricola	1.93527	0.0131868	M1_N
Chitinophaga_eiseniae	1.93474	0.0296703	M1_N
Candidatus_Roizmanbacteria_bacterium_CG_4_9_14_0_2_um_filter_38_17	1.93457	0.0446704	M1_N
Streptomyces_sp._alain-838	1.93339	0.0446704	M1_G
uncultured_actinobacterium_HF0500_35G12	-1.93267	0.004346	M1_N
Salinigranum_salinum	-1.93227	0.00426035	M1_N
Pseudoxanthomonas_sp._X-1	1.9317	0.0131868	M1_N
Alteromonas_pelagimontana	1.93159	0.0446704	M1_N
Chromobacterium_rhizoryzae	1.93154	0.0391059	M1_N
Betaproteobacteria_bacterium_SCGC_AG-212-J23	-1.93135	0.0010989	M1_N
Chitinophaga_sp._O9	1.93134	0.0211227	M1_N
Undibacterium_sp._KW1	1.93103	0.0131868	M1_G
Thaumarchaeota_archaeon_13_1_40CM_38_12	-1.93097	0.00426035	M1_N
Candidatus_Cloacimonetes_bacterium_4572_55	1.92758	0.0296703	M1_N
Sphingomonas_sp._NIC1	1.92756	0.017959	M1_N
Streptomyces_sp._JV178	1.92645	0.0446704	M1_G
Acidovorax_sp._RAC01	1.92595	0.0197802	M1_G
Nitrospira_japonica	-1.92268	0.0010989	M1_G
Pseudomonas_viridiflava	1.92248	0.0131868	M1_N
Nocardiopsis_lucentensis	1.9222	0.0151809	M1_N
Euzebyaceae_bacterium	-1.92146	0.0010989	M1_N
Arthrobacter_phage_SorJuana	1.92136	0.0446704	M1_N
Acidovorax_sp._HDW3	1.91952	0.0131868	M1_N
Pseudomonas_sp._SCB32	1.91775	0.0131868	M1_N
Endozoicomonas_montiporae	1.91717	0.0417582	M1_G
Candidatus_Nitrososphaera_sp._13_1_40CM_48_12	-1.91713	0.0010989	M1_N
Duganella_sp._GN2-R2	1.91683	0.0417582	M1_N
Streptomyces_sp._SID8376	1.91527	0.0417582	M1_G
Deltaproteobacteria_bacterium_GWD2_55_8	-1.91392	0.00426035	M1_N
Nocardiopsis_salina	1.91367	0.0446704	M1_N
Stenotrophomonas_tumulicola	1.91294	0.0197802	M1_G
Colletotrichum_fioriniae	1.91197	0.0446704	M1_N
Rhodococcus_sp._05-2254-2	1.91192	0.042254	M1_N
Kineosporiaceae_bacterium_B12	-1.91097	0.0010989	M1_N
Sphingobium_sp._ba1	1.91069	0.0043956	M1_N
Micrococcus_sp._TA1	1.90973	0.0417582	M1_N
Massilia_sp._LC238	1.90864	0.0417582	M1_N
Streptomyces_sp._NRRL_S-1022	1.90829	0.0378126	M1_G
Alphaproteobacteria_bacterium_MarineAlpha4_Bin1	-1.90701	0.0010989	M1_N
Actinomadura_sp._WMMA1423	1.90628	0.0417582	M1_N
Nocardia_amamiensis	-1.90544	0.004346	M1_N
Pseudomonas_nosocomialis	1.90537	0.0197802	M1_G
Actinobacteria_bacterium_13_2_20CM_2_66_6	-1.90493	0.0010989	M1_N
Pseudomonas_sp._EpS/L25	-1.90463	0.0010989	M1_N
Acidobacteria_bacterium_RIFCSPLOWO2_02_FULL_65_29	-1.90341	0.0010989	M1_N
Deinococcus_peraridilitoris	1.90284	0.0296703	M1_G
Enterobacter_sp._FY-07	-1.90195	0.00426035	M1_N
uncultured_Gemmatimonadetes_bacterium_Rifle_16ft_4_minimus_27071	-1.90096	0.00426035	M1_N
Nitrospira_sp._CR1.3	-1.90062	0.0010989	M1_G
Thermorudis_peleae	-1.90033	0.0010989	M1_N
Nocardioides_sp._ZJ1313	1.89905	0.0131868	M1_G
Armatimonadetes_bacterium_RBG_19FT_COMBO_69_19	-1.898	0.0010989	M1_N
Betaproteobacteria_bacterium_RIFCSPLOWO2_12_FULL_66_14	-1.89778	0.0010989	M1_N
uncultured_actinobacterium_Rifle_16ft_4_minimus_38826	-1.89772	0.0010989	M1_N
Streptomyces_sp._WAC_04229	1.89698	0.0289309	M1_N
Alkalinema_sp._CACIAM_70d	1.89587	0.0417582	M1_N
Xanthomonas_phaseoli	1.89554	0.0197802	M1_G
Pectobacterium_brasiliense	1.89492	0.0446704	M1_G
Sphingopyxis_sp._JAI128	1.89448	0.0197802	M1_N
Streptomyces_scabiei	1.89411	0.0296703	M1_G
Stenotrophomonas_koreensis	1.89402	0.0296703	M1_G
Freshwater_phage_uvFW-CGR-AMD-COM-C440	1.89314	0.0151809	M1_N
Amycolatopsis_sp._K13G38	-1.89272	0.0010989	M1_N
Streptomyces_sp._S1D4-23	-1.89271	0.004346	M1_N
Sphingobium_hydrophobicum	1.89225	0.0446704	M1_G
Pseudogymnoascus_sp._VKM_F-4518_(FW-2643)	1.89189	0.0151809	M1_G
Amycolatopsis_lurida	1.8916	0.0446704	M1_N
Xenorhabdus_sp._KJ12.1	1.89079	0.0267349	M1_N
Pedobacter_sp._LMG_31462	1.89011	0.0296703	M1_N
Nitrospira_moscoviensis	-1.88921	0.0021978	M1_N
Limnohabitans_sp._Hippo4	1.88872	0.00769231	M1_N
Streptomyces_sp._SID12488	1.88872	0.0131868	M1_G
Ochrobactrum_sp._PW1	1.88872	0.0131868	M1_N
Chlorociboria_aeruginascens	1.88821	0.0446704	M1_N
Tricholoma_bakamatsutake	-1.88814	0.00293063	M1_N
Brevundimonas_sp._SPF441	1.88721	0.004346	M1_N
Paraburkholderia_sp._CNPSo_3157	1.88675	0.0131868	M1_N
Gulosibacter_sp._YIM_102482-1	1.8866	0.0151809	M1_N
Sporichthya_polymorpha	-1.88637	0.0010989	M1_N
Rhodobacter_capsulatus	1.88532	0.0332993	M1_N
Rheinheimera_pacifica	1.885	0.0278744	M1_N
Rhizobium_sp._BK251	1.88492	0.0296703	M1_G
Cordyceps_fumosorosea	1.88359	0.0446704	M1_N
Extensimonas_vulgaris	1.88087	0.0197802	M1_G
Rhodospirillales_bacterium_RIFCSPLOWO2_12_FULL_67_15	-1.87955	0.0010989	M1_N
Methylomarinum_vadi	1.87909	0.0296703	M1_N
Candidatus_Magasanikbacteria_bacterium_RIFCSPHIGHO2_01_FULL_47_8	1.87859	0.0446704	M1_G
Streptomyces_pini	1.87845	0.0312322	M1_G
Streptomyces_sp._SID9727	1.87783	0.0312322	M1_N
Georgenia_satyanarayanai	1.87647	0.0197802	M1_G
Caedimonadaceae_bacterium	1.87483	0.0446704	M1_G
Ophiocordyceps_unilateralis	1.87478	0.0446704	M1_N
Streptomyces_sp._CAI-85	1.874	0.0267349	M1_G
Deinococcales_bacterium	1.87391	0.0010989	M1_G
Gordonia_phage_Quasar	-1.87367	0.0153332	M1_G
Gordonia_phage_Quasar	-1.87367	0.0153332	M1_N
Desulfuromonadales_bacterium_GWD2_54_10	-1.87295	0.00426035	M1_N
Sphingomonas_rubra	1.87243	0.0131868	M1_N
Armatimonadetes_bacterium_13_1_40CM_3_65_7	-1.87236	0.0010989	M1_N
Mycobacterium_phage_Piper2020	1.87153	0.0446704	M1_N
Stenotrophomonas_sp._AG209	1.87116	0.00409199	M1_N
Cellulomonas_iranensis	1.86761	0.0312322	M1_N
Streptomyces_sp._SID10815	1.86661	0.0131868	M1_N
Streptomyces_sp._p1417	1.8653	0.0227747	M1_G
Betaproteobacteria_bacterium_RIFCSPLOWO2_12_FULL_65_14	-1.86493	0.0010989	M1_N
Scytalidium_lignicola	1.8646	0.0446704	M1_G
Rhizobiales_bacterium_CCH11-D2	1.86377	0.0447678	M1_G
Ferrovum_sp._Z-31	1.86228	0.0446704	M1_G
Xanthomonadaceae_bacterium_CU05-9	1.86215	0.0296703	M1_N
Actinobacteria_bacterium_13_1_20CM_3_68_9	-1.86214	0.0010989	M1_N
Nitrosomonadales_bacterium_Swamp67	-1.86202	0.0010989	M1_N
Parachlamydiaceae_bacterium	1.86182	0.0010989	M1_N
Methanocaldococcus_bathoardescens	-1.86052	0.00620803	M1_N
Candidatus_Rokubacteria_bacterium_13_1_40CM_4_69_39	-1.86052	0.00632318	M1_N
Sphingobium_yanoikuyae	1.85855	0.0131868	M1_N
Curtobacterium_sp._MCLR17_034	1.85833	0.0267349	M1_N
Streptomyces_sp._H-KF8	1.85754	0.0152183	M1_G
Kocuria_rhizophila	1.85674	0.020275	M1_N
Acidovorax_sp._100	1.8559	0.0197802	M1_G
Streptomyces_bauhiniae	1.85571	0.0131868	M1_G
Acinetobacter_baumannii	1.85422	0.0296703	M1_N
Acidobacterium_sp.	-1.85341	0.0010989	M1_N
Pseudomonas_moorei	1.85298	0.0446704	M1_G
Streptomyces_capuensis	1.85282	0.0151809	M1_G
Stenotrophomonas_sp.	1.85256	0.0197802	M1_G
Sphingomonadales_bacterium_EhC05	1.85225	0.00769231	M1_G
Sphingomonadales_bacterium_28-64-96	1.85218	0.0010989	M1_N
Candidatus_Endobugula_sertula	1.85187	0.0296703	M1_N
Rubinisphaera_sp.	1.85166	0.0010989	M1_N
Actinoplanes_phage_phiAsp2	-1.85148	0.012655	M1_N
Streptomyces_sp._FBKL.4005	1.85109	0.0446704	M1_G
Mimivirus_AB-566-O17	-1.84873	0.004346	M1_G
Deltaproteobacteria_bacterium_RBG_16_49_23	-1.84865	0.0010989	M1_N
Betaproteobacteria_bacterium_GR16-43	-1.84803	0.0010989	M1_N
Cyanobacteria_bacterium_UBA11049	-1.84758	0.0010989	M1_G
Pseudomonas_moorei	1.84728	0.0151809	M1_N
Coniella_lustricola	1.84643	0.0446704	M1_G
Methylobacterium_sp._R2-1	1.84579	0.0131868	M1_N
Rugamonas_rubra	1.84535	0.0296703	M1_N
Streptomyces_sp._NRRL_S-920	1.8453	0.0463455	M1_N
Nitrosomonadales_bacterium_0125_3	-1.84446	0.0010989	M1_N
fungal_sp._No.14919	1.84417	0.0267349	M1_N
Chloroflexi_bacterium_13_1_40CM_2_70_6	-1.84322	0.00426035	M1_N
Pseudomonas_koreensis	1.84289	0.0131868	M1_N
Myxococcales_bacterium_13_1_40CM_2_68_15	-1.84262	0.00409199	M1_N
Nitrospira_sp._KM1	-1.84084	0.0010989	M1_G
Alkalinema_sp._CACIAM_70d	1.84081	0.0197802	M1_G
Betaproteobacteria_bacterium_13_1_20CM_67_22	-1.84011	0.0010989	M1_N
Nonomuraea_solani	-1.84009	0.0010989	M1_N
Helicocarpus_griseus	1.83975	0.0446704	M1_N
Sphingomonadales_bacterium_RIFCSPHIGHO2_01_FULL_65_20	1.83914	0.0131868	M1_N
Candidatus_Rokubacteria_bacterium_13_1_40CM_2_68_8	-1.83892	0.0010989	M1_N
Candidatus_Omnitrophica_bacterium_CG11_big_fil_rev_8_21_14_0_20_63_9	-1.83851	0.0010989	M1_N
Candidatus_Rokubacteria_bacterium_RIFCSPLOWO2_02_FULL_72_37	-1.83707	0.0010989	M1_N
Bacillus_filamentosus	1.83621	0.0267349	M1_N
Streptomyces_sp._p1417	1.836	0.0463455	M1_N
Macrococcus_caseolyticus	1.83576	0.0446704	M1_N
Spirosoma_lacussanchae	1.83549	0.0289309	M1_N
Nocardia_thailandica	1.83514	0.0177061	M1_G
Desulfovibrio_bastinii	1.83459	0.0267349	M1_N
Microbacterium_sp._LAM7116	1.83437	0.0267349	M1_G
Tardibacter_chloracetimidivorans	1.83413	0.0131868	M1_N
Plantibacter_sp._PA-3-X8	1.83355	0.0267349	M1_N
Arthrobacter_phage_Jaek	1.8334	0.0446704	M1_N
Deltaproteobacteria_bacterium_RIFOXYA2_FULL_55_11	-1.83283	0.00426035	M1_N
Sphingobium_sp._ba1	1.83086	0.0131868	M1_G
Euzebyales_bacterium	-1.83076	0.0010989	M1_N
Flavobacterium_sp._JXAS1	1.82973	0.0227747	M1_N
Betaproteobacteria_bacterium	-1.8297	0.0010989	M1_N
Pseudoalteromonas_ruthenica	1.82952	0.010301	M1_N
Mucilaginibacter_sp._OV119	1.8293	0.0417582	M1_N
Draconibacterium_orientale	-1.82929	0.0010989	M1_N
Chloroflexi_bacterium_13_1_40CM_4_69_19	-1.82872	0.0021978	M1_N
Paucibacter_aquatile	1.82868	0.0296703	M1_N
Massilia_sp._SOD	1.82808	0.0131868	M1_N
Thaumarchaeota_archaeon_13_1_40CM_4_48_7	-1.82792	0.00426035	M1_N
Streptacidiphilus_sp._P02-A3a	1.82742	0.0417582	M1_N
Microbulbifer_sp._ALW1	1.82595	0.0131868	M1_N
Sphingomonas_sp._Leaf257	1.82553	0.0131868	M1_N
Burkholderia_metallica	1.82546	0.0131868	M1_N
Colletotrichum_shisoi	1.82534	0.0446704	M1_N
Tardibacter_chloracetimidivorans	1.82519	0.0197802	M1_G
Undibacterium_sp._KW1	1.8239	0.0131868	M1_N
Caballeronia_glebae	1.82322	0.0197802	M1_G
Candidatus_Hakubanella_thermoalkaliphilus	-1.82301	0.0010989	M1_N
Acidobacteria_bacterium_RIFCSPLOWO2_12_FULL_66_10	-1.822	0.0010989	M1_N
Hydrogenophaga_sp._A37	1.82042	0.00769231	M1_G
Nitrospira_sp._SCGC_AG-212-E16	-1.82035	0.0010989	M1_N
Polaromonas_sp.	1.81948	0.00769231	M1_G
Pseudomonas_sp._Fig-3	1.81933	0.0296703	M1_N
uncultured_Propionibacteriaceae_bacterium	-1.81788	0.00409199	M1_N
Tibeticola_sediminis	1.81768	0.0197802	M1_N
Candidatus_Rokubacteria_bacterium_13_2_20CM_69_15_1	-1.81756	0.0010989	M1_N
Extensimonas_vulgaris	1.81612	0.0417582	M1_N
Ruminiclostridium_sufflavum	1.81575	0.0446704	M1_G
TM7_phylum_sp._oral_taxon_352	1.81559	0.0312322	M1_N
Chloroflexi_bacterium	-1.81488	0.0010989	M1_N
Deltaproteobacteria_bacterium_RIFCSPLOWO2_12_55_13	-1.81253	0.0010989	M1_G
Candidatus_Rokubacteria_bacterium_RIFCSPLOWO2_02_FULL_73_56	-1.8125	0.00426035	M1_N
Candidatus_Buchananbacteria_bacterium_RBG_13_36_9	1.81176	0.0446704	M1_G
Acidovorax_sp._HMWF029	1.81161	0.0296703	M1_G
Massilia_aquatica_Holochova_et_al._2020	1.81117	0.0296703	M1_N
Herminiimonas_sp._KBW02	1.811	0.0417582	M1_N
Candidatus_Moranbacteria_bacterium_GW2011_GWF1_36_4	1.81041	0.0267349	M1_N
Candidatus_Rokubacteria_bacterium_13_1_40CM_68_15	-1.81021	0.0010989	M1_N
Microbacterium_phage_Kelcole	1.80991	0.01455	M1_G
Streptomyces_sp._NRRL_F-4707	1.80947	0.0151809	M1_N
Burkholderiales_bacterium_RIFCSPHIGHO2_12_63_9	1.80916	0.0197802	M1_G
Sphingobium_chungbukense	1.80896	0.0197802	M1_N
Betaproteobacteria_bacterium_RIFCSPLOWO2_02_FULL_64_12	-1.8084	0.0010989	M1_N
Mucilaginibacter_paludis	1.80837	0.0447678	M1_N
Sphingomonas_ginsenosidivorax	1.80829	0.0131868	M1_N
Candidatus_Rokubacteria_bacterium_13_1_20CM_2_68_19	-1.80796	0.00426035	M1_N
Fontimonas_thermophila	-1.80653	0.0131868	M1_N
Amycolatopsis_palatopharyngis	1.80649	0.0296703	M1_G
Marinobacterium_aestuarii	1.80459	0.010301	M1_N
Candidatus_Rokubacteria_bacterium_RIFCSPLOWO2_12_FULL_73_47	-1.80454	0.00426035	M1_N
Brevundimonas_sp._Leaf363	1.80353	0.0296703	M1_N
Syntrophaceae_bacterium_PtaB.Bin038	-1.80288	0.0010989	M1_N
Lasallia_pustulata	1.80263	0.0267349	M1_N
Candidatus_Rokubacteria_bacterium	-1.80256	0.0010989	M1_N
Candidatus_Rokubacteria_bacterium_13_1_20CM_4_68_9	-1.8025	0.0010989	M1_N
Betaproteobacteria_bacterium_SG8_41	-1.80183	0.0010989	M1_G
Rhodanobacter_fulvus	1.80039	0.0131868	M1_N
Betaproteobacteria_bacterium_CG2_30_68_42	-1.80014	0.0010989	M1_N
Mycobacterium_sp._OK887	1.79969	0.0446704	M1_N
Plantibacter_flavus	1.79894	0.01455	M1_N
Deltaproteobacteria_bacterium_RIFCSPLOWO2_02_FULL_57_26	-1.79889	0.004346	M1_N
Williamsia_sterculiae	1.79872	0.0267349	M1_N
Chloroflexi_bacterium_RBG_16_69_14	-1.79779	0.0010989	M1_N
Sphingobium_sp._CCH11-B1	1.79689	0.0417582	M1_N
Deltaproteobacteria_bacterium_CSP1-8	-1.79633	0.0010989	M1_N
Apibacter_muscae	1.79603	0.0267349	M1_G
uncultured_bacterium_12AC_lac13	-1.79598	0.00426035	M1_G
Paraburkholderia_sp._CNPSo_3157	1.79587	0.0131868	M1_G
Planomicrobium_sp._CPCC_101079	-1.79571	0.00426035	M1_N
uncultured_beta_proteobacterium_Rifle_16ft_4_minimus_15631	-1.7954	0.0010989	M1_N
Deltaproteobacteria_bacterium_RIFCSPLOWO2_12_FULL_57_22	-1.79522	0.0010989	M1_N
Paenibacillus_sp._P1XP2	-1.79508	0.0010989	M1_N
Achromobacter_phage_Motura	1.79475	0.0446704	M1_N
Deltaproteobacteria_bacterium_RIFCSPLOWO2_12_FULL_60_16	-1.79427	0.0010989	M1_N
Halobacillus_trueperi	-1.79409	0.0010989	M1_N
Sphingomonas_histidinilytica	1.79398	0.0131868	M1_N
Thaumarchaeota_archaeon_13_1_20CM_2_39_20	-1.79354	0.012655	M1_N
Xanthomonas_phage_Xoo-sp2	1.79326	0.0446704	M1_N
Geodermatophilus_aquaeductus	-1.79245	0.004346	M1_N
Pseudoxanthomonas_sp._NML130738	1.79093	0.00769231	M1_N
Streptomyces_sp._W18L9	1.79013	0.00813374	M1_N
Spirosoma_fluviale	1.78639	0.0043956	M1_N
Dokdonia_pacifica	1.78639	0.0131868	M1_N
archaeon_HR06	-1.78621	0.00769231	M1_N
Betaproteobacteria_bacterium_13_1_20CM_3_63_8	-1.78608	0.0010989	M1_N
Streptomyces_sp._A7024	1.78404	0.0417582	M1_G
Pseudomonas_fluorescens	1.78319	0.0131868	M1_N
Micromonospora_violae	-1.78218	0.00535382	M1_G
Candidatus_Rokubacteria_bacterium_RBG_16_73_20	-1.77937	0.0010989	M1_N
Streptomyces_sp._LHW50302	1.77902	0.0267349	M1_N
Candidatus_Rokubacteria_bacterium_RIFCSPLOWO2_12_FULL_71_22	-1.77901	0.0021978	M1_N
Streptomyces_qinglanensis	1.77734	0.0446704	M1_G
Deltaproteobacteria_bacterium_RIFCSPLOWO2_02_56_12	-1.77677	0.0010989	M1_N
Janthinobacterium_sp._HH107	1.77585	0.0267349	M1_N
Streptomyces_torulosus	1.77462	0.0289309	M1_N
Thermotoga_sp._TBYP3.1.4.1	-1.77363	0.0010989	M1_G
Myxococcales_bacterium_SG8_38_1	-1.77112	0.0131868	M1_N
Sphingomonas_sp._HMP6	1.77088	0.0131868	M1_N
Spirosoma_lacussanchae	1.77062	0.0152183	M1_G
uncultured_crenarchaeote	-1.77027	0.0131868	M1_N
Alkanindiges_illinoisensis	1.7702	0.0128529	M1_N
Variovorax_sp._HH01	1.7692	0.0278744	M1_N
Nitrosopumilales_archaeon	-1.76914	0.0131868	M1_N
Mycobacterium_sp._1274756.6	1.76853	0.0446704	M1_N
Actinobacteria_bacterium_13_1_40CM_4_65_12	-1.76853	0.0010989	M1_N
Acidobacteria_bacterium_RIFCSPLOWO2_02_FULL_59_13	-1.76835	0.0010989	M1_N
Stenotrophomonas_sp._Bg11-02	1.76776	0.0177061	M1_N
Thaumarchaeota_archaeon_13_1_40CM_3_38_6	-1.76509	0.00426035	M1_N
Streptomyces_sp._AJS327	1.76508	0.0151809	M1_G
Kribbella_sandramycini	1.76483	0.0417582	M1_G
Syntrophomonas_zehnderi	-1.76433	0.0010989	M1_N
Brevibacillus_nitrificans	-1.7643	0.004346	M1_N
Marinobacter_sp._W62	1.76362	0.0152183	M1_N
Candidatus_Rokubacteria_bacterium_13_1_20CM_2_70_7	-1.76353	0.004346	M1_N
Chloroflexi_bacterium_CSP1-4	-1.76324	0.0010989	M1_N
Trichomonascus_ciferrii	1.76305	0.0446704	M1_G
Stenotrophomonas_sp._CC120223-11	1.76296	0.020275	M1_N
Solirubrobacterales_bacterium_URHD0059	-1.76279	0.0010989	M1_N
uncultured_Acidobacteria_bacterium_A12	-1.76269	0.00426035	M1_N
Parendozoicomonas_haliclonae	1.7623	0.0446704	M1_N
Yersinia_enterocolitica	1.76207	0.0312322	M1_N
Kocuria_sediminis	-1.76162	0.00426035	M1_N
Streptomyces_viridochromogenes	1.76123	0.0417582	M1_G
Bacteroides_graminisolvens	1.76069	0.0452426	M1_N
Terracoccus_luteus	1.76048	0.042254	M1_N
Candidatus_Muproteobacteria_bacterium_RBG_16_62_13	-1.75967	0.0043956	M1_N
[Eubacterium]_rectale	1.75949	0.0446704	M1_G
Nitrobacter_sp._Nb-311A	1.75948	0.0197802	M1_N
Nitriliruptor_sp.	-1.75857	0.0010989	M1_N
Candidatus_Nitrosocaldus_islandicus	-1.75833	0.00620803	M1_N
Actinobacteria_bacterium_RBG_16_68_12	-1.75818	0.0010989	M1_N
Streptomyces_qinglanensis	1.7567	0.0267349	M1_N
Chryseobacterium_taklimakanense	1.75612	0.0325196	M1_N
uncultured_Acidimicrobiales_bacterium	-1.75605	0.0010989	M1_N
Candidatus_Rokubacteria_bacterium_RIFCSPHIGHO2_02_FULL_73_26	-1.75554	0.0010989	M1_N
Acidobacteria_bacterium_13_1_40CM_3_55_6	-1.75502	0.0010989	M1_N
Methanobacterium_sp._MB1	-1.75445	0.00620803	M1_N
Streptomyces_virus_Scap1	1.75246	0.00813374	M1_N
Pseudacidovorax_intermedius	1.74936	0.0296703	M1_N
uncultured_Verrucomicrobiales_bacterium_HF0010_05E02	-1.74893	0.0010989	M1_N
Pseudomonas_kunmingensis	1.74875	0.0417582	M1_N
Sporichthya_sp.	-1.74847	0.0010989	M1_N
Mycolicibacterium_doricum	-1.74837	0.0010989	M1_N
Sphingomonas_sp._CCP-7	1.74826	0.0131868	M1_N
Streptomyces_sp._IBTA2	1.74824	0.0267349	M1_N
Xylaria_longipes	1.74748	0.0446704	M1_G
Streptomyces_sp._BK329	1.74745	0.01455	M1_G
Dyella_sp._SG562	1.74696	0.0131868	M1_N
Chloroflexi_bacterium_GWC2_73_18	-1.7456	0.0010989	M1_N
Zhengella_mangrovi	1.74529	0.0131868	M1_N
Paraburkholderia_azotifigens	-1.74529	0.0010989	M1_N
uncultured_beta_proteobacterium_HF0130_04F21	-1.74373	0.004346	M1_N
Cordyceps_militaris	1.74163	0.0267349	M1_G
Pseudophaeobacter_leonis	-1.74161	0.00426035	M1_N
Streptomyces_sp._SID5475	1.74084	0.00813374	M1_N
Chryseobacterium_sp._CECT_9293	1.73948	0.0446704	M1_G
Betaproteobacteria_bacterium_RIFCSPLOWO2_12_FULL_62_58	-1.73938	0.0010989	M1_G
Myroides_odoratus	1.73923	0.0267349	M1_N
Tenacibaculum_caenipelagi	1.73898	0.0151809	M1_N
Hungatella_hathewayi	1.73851	0.0446704	M1_N
Leptotrichia_hofstadii	-1.73772	0.0010989	M1_N
Halomonas_elongata	1.73764	0.012655	M1_N
Pseudokineococcus_marinus	1.73686	0.0131868	M1_G
Streptomyces_sp._LHW50302	1.73647	0.0267349	M1_G
Novosphingobium_piscinae	1.73558	0.0296703	M1_G
Armatimonadetes_bacterium_CG2_30_59_28	-1.73395	0.0021978	M1_N
Gordonia_phage_Gibbin	-1.73358	0.0153332	M1_G
Streptomyces_sp._SID8352	1.73352	0.0131868	M1_G
Flaviflexus_massiliensis	1.73339	0.0446704	M1_N
Stenotrophomonas_sp._Nf4	1.7324	0.0296703	M1_N
Candidatus_Rokubacteria_bacterium_13_1_40CM_69_96	-1.73188	0.00426035	M1_N
Sphingomonas_sp._S-NIH.Pt3_0716	1.72749	0.0391059	M1_N
Pseudomonas_phage_Zuri	1.72712	0.01455	M1_N
Plantibacter_sp._M259	1.72681	0.0267349	M1_G
Streptomyces_sp._CB02460	1.7258	0.0463455	M1_N
Methylobacterium_sp.	1.72537	0.00769231	M1_N
Aspergillus_udagawae	1.72511	0.0267349	M1_N
Cryobacterium_sp._Hh39	-1.72452	0.0010989	M1_N
Clavispora_lusitaniae	1.72335	0.0151809	M1_N
Lawsonia_intracellularis	-1.72274	0.0010989	M1_N
Comamonas_sp._E6	1.72149	0.004346	M1_N
Cronobacter_dublinensis	1.72066	0.0446704	M1_N
Arthrobacter_sp._PAMC_25486	1.72056	0.0446704	M1_G
Blastomonas_fulva	1.72021	0.0391059	M1_N
Comamonas_sp._26	1.7199	0.0244437	M1_N
Algibacter_aestuarii	-1.71944	0.00426035	M1_G
Yersinia_enterocolitica	1.7194	0.0312322	M1_G
Flavobacterium_gillisiae	1.71903	0.010301	M1_G
Saccharomonospora_sp._LRS4.154	1.71868	0.0151809	M1_N
Diaphorobacter_sp._J5-51	1.71839	0.0312322	M1_G
Blastomonas_sp._AAP25	1.71689	0.00769231	M1_G
Colletotrichum_nymphaeae	1.71676	0.0446704	M1_G
Streptomyces_triticiradicis	1.71655	0.010301	M1_G
Caulobacter_sp._YL-Caulobacter	1.71642	0.0296703	M1_N
Candidatus_Buchananbacteria_bacterium_RBG_13_36_9	1.71547	0.0446704	M1_N
Alphaproteobacteria_bacterium_13_1_20CM_3_64_12	-1.71546	0.0010989	M1_G
Fontimonas_thermophila	-1.71531	0.0010989	M1_G
Alkalinema_sp._RU_4_3	1.71506	0.0289309	M1_N
uncultured_crenarchaeote_57a5	-1.71482	0.0332993	M1_N
Sapientia_aquatica	1.71382	0.00769231	M1_N
Aureobasidium_pullulans	1.71327	0.0446704	M1_N
Thaumarchaeota_archaeon_13_1_40CM_3_50_5	-1.71308	0.00426035	M1_G
Tetrasphaera_elongata	-1.71277	0.0010989	M1_N
Parachlamydiaceae_bacterium	1.71208	0.0010989	M1_G
Erwinia_phage_vB_EamP-S6	1.71108	0.0267349	M1_G
Frigoribacterium_sp._9N	-1.71005	0.00426035	M1_N
Gordonia_phage_OhMyWard	1.70992	0.0267349	M1_G
Actinobacteria_bacterium_13_1_20CM_2_65_11	-1.7099	0.0010989	M1_N
Amycolatopsis_panacis	-1.70987	0.00620803	M1_N
Candidatus_Nitrospira_nitrificans	-1.70941	0.0010989	M1_N
Streptomyces_sp._R302	1.70727	0.0447678	M1_N
Streptomyces_phage_StarPlatinum	1.70716	0.0446704	M1_G
Chloroflexi_bacterium_13_1_40CM_68_15	-1.70637	0.0010989	M1_N
Skermania_sp._ID1734	-1.70633	0.00426035	M1_N
Geopsychrobacter_electrodiphilus	1.70443	0.0197802	M1_N
Bacillus_sp._SRB_336	1.70426	0.0296703	M1_N
Pseudodesulfovibrio_hydrargyri	-1.70398	0.00598116	M1_N
Actinoplanes_globisporus	-1.70172	0.0010989	M1_N
Ruminiclostridium_hungatei	1.70122	0.012655	M1_N
Achromobacter_sp._Root83	1.70119	0.0043956	M1_N
Betaproteobacteria_bacterium_RIFCSPLOWO2_02_FULL_65_20	-1.70105	0.0010989	M1_N
Burkholderia_sp._KK1	1.70057	0.0131868	M1_G
Gemmatimonadetes_bacterium_21-71-4	-1.70015	0.0010989	M1_G
Nitrosospira_sp._Nsp44	-1.70008	0.0010989	M1_N
Acidobacteria_bacterium_Pan2503	-1.69987	0.0010989	M1_N
Sphingomonas_sp._S-NIH.Pt1_0416	1.69933	0.0197802	M1_N
Thalassotalea_agarivorans	-1.69842	0.0010989	M1_N
Betaproteobacteria_bacterium_RIFCSPLOWO2_02_64_14	-1.69841	0.0010989	M1_G
Vibrio_nigripulchritudo	1.69813	0.0131868	M1_N
Actinobacteria_bacterium_RBG_16_67_10	-1.69744	0.0010989	M1_N
Sphaerobacteraceae_bacterium	-1.69688	0.0010989	M1_N
Candidatus_Falkowbacteria_bacterium_HGW-Falkowbacteria-1	1.69635	0.0267349	M1_N
Candidatus_Rokubacteria_bacterium_RIFCSPHIGHO2_12_FULL_73_22	-1.69549	0.00620803	M1_N
Acidovorax_cattleyae	1.69472	0.00892378	M1_N
Sphingobium_baderi	1.69196	0.0043956	M1_N
Betaproteobacteria_bacterium_RIFCSPLOWO2_12_FULL_62_13	-1.69169	0.0010989	M1_G
Nitrospirae_bacterium_RBG_19FT_COMBO_58_9	-1.69135	0.00769231	M1_N
Pantoea_brenneri	1.69074	0.00813374	M1_N
Dactylosporangium_sp.	-1.68978	0.0010989	M1_N
Microbacterium_sp._SA39	1.68942	0.0446704	M1_N
Pseudomonas_lutea	1.68911	0.0332993	M1_N
Gemmatimonadetes_bacterium_13_1_40CM_4_65_7	-1.68895	0.0010989	M1_N
Clostridium_novyi	-1.68755	0.0010989	M1_N
Streptomyces_sp._2231.1	1.68637	0.0447678	M1_N
Acidobacteria_bacterium_RIFCSPLOWO2_02_FULL_60_20	-1.68569	0.0010989	M1_N
Curtobacterium_sp._MCBA15_009	1.68564	0.0267349	M1_N
Streptomyces_sp._CAI-85	1.68545	0.0151809	M1_N
Janthinobacterium_sp._AD80	-1.6852	0.0010989	M1_N
Candidatus_Rokubacteria_bacterium_13_2_20CM_2_70_11	-1.68472	0.00426035	M1_N
uncultured_crenarchaeote_29d5	-1.68466	0.0131868	M1_N
Rhizobium_leucaenae	1.68458	0.0296703	M1_N
Zymomonas_sp.	1.68398	0.0010989	M1_N
Streptomyces_ambofaciens	1.68348	0.0197802	M1_G
Actinobacteria_bacterium	-1.68273	0.0010989	M1_N
Alcanivorax_profundi	1.68193	0.0267349	M1_N
uncultured_beta_proteobacterium_Rifle_16ft_4_minimus_10522	-1.68144	0.00426035	M1_G
Microbacterium_lindanitolerans	1.68111	0.0417582	M1_N
Sphingopyxis_macrogoltabida	1.68102	0.0010989	M1_N
Pseudomonas_koreensis	1.68021	0.0417582	M1_G
Blastomonas_sp._CCH1-A6	1.67985	0.0021978	M1_N
candidate_division_TM6_bacterium_GW2011_GWF2_38_10	1.67966	0.0446704	M1_N
Intrasporangium_calvum	-1.6794	0.0010989	M1_N
Microbispora_sp._H10885	-1.67754	0.0010989	M1_N
Sphingobium_sp._YR768	1.67609	0.0131868	M1_N
Pseudonocardia_autotrophica	-1.67607	0.0010989	M1_N
Candidatus_Syntrophoarchaeum_butanivorans	-1.67569	0.00409199	M1_N
Mimivirus_AB-566-O17	-1.67508	0.00632318	M1_N
Alcanivorax_sp._DSM_26295	1.67485	0.0131868	M1_N
Actinomadura_oligospora	1.67409	0.00769231	M1_G
Candidatus_Nitrosarchaeum_limnium	-1.67386	0.00769231	M1_N
Nitriliruptorales_bacterium	-1.67346	0.0010989	M1_N
Deltaproteobacteria_bacterium	-1.67284	0.0010989	M1_N
Nguyenibacter_vanlangensis	1.67259	0.0177061	M1_N
Flavobacterium_gillisiae	1.67148	0.0278744	M1_N
Actinobacteria_bacterium_HGW-Actinobacteria-1	-1.67128	0.00426035	M1_N
Coleophoma_crateriformis	1.67053	0.0151809	M1_N
Dyella_sp._4G-K06	1.66895	0.0131868	M1_N
Elusimicrobia_bacterium_GWA2_69_24	-1.66779	0.0043956	M1_N
Candidatus_Daviesbacteria_bacterium_RIFCSPLOWO2_02_FULL_36_7	1.66771	0.0446704	M1_G
uncultured_Chloroflexi_bacterium_HF0200_09I09	-1.66771	0.0010989	M1_G
Fluviicola_sp._XM-24bin1	-1.66697	0.0010989	M1_G
Pontibacter_sp._BT327	1.66663	0.0131868	M1_N
Rubrobacter_xylanophilus	-1.66608	0.0010989	M1_N
Nitrospira_sp._CG24E	-1.66538	0.0021978	M1_N
Candidatus_Nitrososphaera_sp._13_1_40CM_48_12	-1.66517	0.0010989	M1_G
Macromonas_sp._BK-30	1.66474	0.0296703	M1_G
Candidatus_Spechtbacteria_bacterium_RIFCSPHIGHO2_02_FULL_43_15b	1.66391	0.0446704	M1_G
Schaalia_odontolytica	-1.66385	0.0010989	M1_N
Caulobacteraceae_bacterium_OTSz_A_272	-1.66349	0.0010989	M1_G
Streptomyces_yangpuensis	1.66297	0.0446704	M1_N
Pedosphaera_parvula	-1.66269	0.0010989	M1_N
Streptomyces_phage_StarPlatinum	1.66194	0.00813374	M1_N
Sphingomonas_sp._35-24ZXX	1.66007	0.0131868	M1_N
Achromobacter_sp._2789STDY5608628	1.65927	0.004346	M1_N
Crenobacter_luteus	1.65873	0.0417582	M1_N
Candidatus_Saccharibacteria_bacterium_32-45-3	1.65862	0.0446704	M1_G
Acinetobacter_sp._NFM2	-1.65862	0.00426035	M1_N
Fibrella_sp._ES10-3-2-2	1.65844	0.0452426	M1_G
Streptomyces_phage_FrodoSwaggins	1.65745	0.0267349	M1_N
Streptomyces_sp._SID161	1.65694	0.0278744	M1_G
Novosphingobium_resinovorum	1.65645	0.0131868	M1_N
Acidovorax_sp._Root402	1.65629	0.0296703	M1_N
Pedobacter_sp._LMG_31462	1.65583	0.0417582	M1_G
Halopolyspora_algeriensis	-1.65477	0.0021978	M1_N
Chitinophaga_sp._O9	1.65457	0.0417582	M1_G
Salinisphaera_sp.	1.65383	0.020275	M1_G
Deltaproteobacteria_bacterium_GWA2_57_13	-1.65356	0.0010989	M1_N
Macrophomina_phaseolina	1.6531	0.0151809	M1_N
Brevundimonas_sp._GW460-12-10-14-LB2	1.65223	0.00769231	M1_N
Byssochlamys_spectabilis	1.64964	0.0267349	M1_N
Pseudomonas_phage_GP100	1.64912	0.0151809	M1_N
Pseudomonas_sp._PA15(2017)	1.64912	0.0267349	M1_N
Frankia_sp._Iso899	-1.64907	0.0010989	M1_N
Delftia_sp._K82	1.64883	0.0446704	M1_N
Candidatus_Rokubacteria_bacterium_13_1_40CM_2_70_45	-1.64751	0.00620803	M1_N
Nitrospira_sp._ST-bin5	-1.64656	0.0010989	M1_N
Streptomyces_triticiradicis	1.64614	0.0312322	M1_N
Acidiferrimicrobium_australe	-1.64538	0.0010989	M1_N
uncultured_Thermoleophilia_bacterium	-1.64507	0.0010989	M1_N
Dorea_longicatena	-1.64497	0.0010989	M1_N
Candidatus_Dormibacteraeota_bacterium	-1.64459	0.0010989	M1_N
Nitrospira_sp._ST-bin4	-1.64435	0.0010989	M1_N
Acidobacteria_bacterium_13_1_40CM_2_56_11	-1.64388	0.0010989	M1_N
Thaumarchaeota_archaeon_13_1_40CM_2_39_4	-1.6432	0.017959	M1_N
Rhizobium_sp._GV031	1.64261	0.0446704	M1_N
Paraburkholderia_sp.	1.64222	0.00769231	M1_N
Chlorociboria_aeruginascens	1.64129	0.0267349	M1_G
Candidatus_Rokubacteria_bacterium_13_1_40CM_4_69_5	-1.64122	0.0021978	M1_N
Collinsella_aerofaciens	-1.64116	0.0010989	M1_N
Streptomyces_sp._GY16	1.64094	0.0151809	M1_G
Microbacterium_virus_OneinaGillian	1.64071	0.0463455	M1_N
Acidothermus_cellulolyticus	-1.64071	0.0010989	M1_N
Aaosphaeria_arxii	1.64062	0.0267349	M1_N
Halomonas_sp._MES3-P3E	1.64036	0.0447678	M1_N
Candidatus_Saccharibacteria_bacterium_32-45-3	1.64034	0.00813374	M1_N
Micromonospora_sp._CNZ322	-1.63777	0.00426035	M1_N
Plantibacter_sp._PA-3-X8	1.63758	0.0446704	M1_G
Helotiales_sp._DMI_Dod_QoI	1.63728	0.042254	M1_N
Thiohalocapsa_marina	1.63726	0.0296703	M1_N
Gimesia_sp._JC646	-1.63695	0.0010989	M1_N
Limnochorda_pilosa	-1.63641	0.0010989	M1_N
Candidatus_Saccharibacteria_bacterium_QS_5_54_17	1.63627	0.0267349	M1_G
Didymosphaeria_enalia	1.636	0.0417582	M1_N
Acidovorax_sp._107	1.63598	0.0043956	M1_N
Persephonella_marina	-1.63598	0.004346	M1_G
bacterium_AM6	1.63593	0.0296703	M1_G
uncultured_Corynebacteriales_bacterium	-1.6349	0.0010989	M1_N
Bradyrhizobium_sp._Rc3b	-1.63426	0.0010989	M1_N
Polaromonas_sp.	1.63408	0.0010989	M1_N
Betaproteobacteria_bacterium_RIFCSPLOWO2_02_FULL_62_79	-1.63349	0.0010989	M1_G
Streptomyces_sp._NRRL_B-3229	-1.63301	0.00426035	M1_N
Pleionea_mediterranea	1.63269	0.00769231	M1_N
Ottowia_sp._GY511	1.63184	0.0417582	M1_N
Corallococcus_sp._CA047B	1.63131	0.0417582	M1_G
Rhodopirellula_sp._SWK7	1.63121	0.0452426	M1_N
Pseudomonas_sp._MWU12-2323	1.63072	0.012655	M1_N
Halomonas_elongata	1.63056	0.0438213	M1_G
Macromonas_sp._BK-30	1.63016	0.0296703	M1_N
candidate_division_NC10_bacterium_RIFCSPLOWO2_12_FULL_66_18	-1.62937	0.0010989	M1_N
Xanthomonas_citri	1.62905	0.0296703	M1_N
Candidatus_Eisenbacteria_bacterium_RBG_19FT_COMBO_70_11	-1.62899	0.0010989	M1_N
Massilia_alkalitolerans	1.62764	0.0417582	M1_N
Pseudomonas_sp._URMO17WK12:I1	1.6272	0.0452426	M1_G
Streptomyces_virus_Scap1	1.62701	0.0446704	M1_G
Candidatus_Nitrosocaldus_cavascurensis	-1.62525	0.0021978	M1_G
Dyella_sp._M7H15-1	1.62457	0.0244437	M1_N
Pararhodobacter_sp._CIC4N-9	1.62442	0.0197802	M1_N
Alkanindiges_illinoisensis	1.62435	0.0336911	M1_G
Lindgomyces_ingoldianus	1.62375	0.0267349	M1_N
Azospirillum_palustre	1.623	0.0131868	M1_N
Deinococcus_metallilatus	-1.62235	0.0010989	M1_N
Candidatus_Levybacteria_bacterium_RIFCSPLOWO2_12_FULL_37_14	1.62233	0.0267349	M1_G
Undibacterium_sp._B2R-29	1.62138	0.0312322	M1_G
Sphingomonas_sp._FUKUSWIS1	1.62126	0.0463455	M1_N
Tuber_aestivum	-1.62119	0.00293063	M1_G
Herbidospora_sp._NEAU-GS84	1.62094	0.0197802	M1_N
Paenibacillus_xylanexedens	1.62056	0.0446704	M1_G
Frankia_inefficax	-1.61981	0.0010989	M1_N
Yersinia_frederiksenii	1.61958	0.0446704	M1_N
Acidobacteria_bacterium_RIFCSPLOWO2_02_FULL_68_18	-1.61864	0.0010989	M1_N
Photobacterium_proteolyticum	-1.61822	0.00409199	M1_N
Nostoc_sp._TCL26-01	-1.6182	0.0010989	M1_N
Drechslerella_brochopaga	1.61794	0.0197802	M1_G
Candidatus_Rokubacteria_bacterium_13_1_40CM_69_27	-1.61781	0.0010989	M1_N
Hydrogenophaga_sp._A37	1.61692	0.0296703	M1_N
Acidobacteria_bacterium_13_1_20CM_2_57_8	-1.61664	0.004346	M1_N
Corallincola_luteus	1.61659	0.00813374	M1_N
Salinisphaera_sp.	1.61653	0.0378126	M1_N
Mucilaginibacter_corticis	1.61538	0.0197802	M1_N
bacterium_M00.F.Ca.ET.162.01.1.1	1.61514	0.0296703	M1_N
Actinobacteria_bacterium_13_1_40CM_2_65_8	-1.61472	0.012655	M1_N
Streptomyces_sp._WM6372	1.61452	0.0312322	M1_N
Betaproteobacteria_bacterium_RBG_16_64_9	-1.61302	0.0010989	M1_N
Lactobacillus_amylolyticus	-1.61272	0.0010989	M1_N
Deltaproteobacteria_bacterium_ADurb.Bin207	1.61263	0.0296703	M1_N
Rhodobacteraceae_bacterium_SH-1	-1.61241	0.0010989	M1_N
Fusarium_lactis	1.61103	0.0446704	M1_N
uncultured_bacterium_888	-1.61057	0.0010989	M1_G
Acinetobacter_towneri	-1.61007	0.0010989	M1_G
Comamonadaceae_bacterium_BICA1-1	1.60998	0.0446704	M1_G
Hephaestia_caeni	1.6092	0.0131868	M1_N
Massilia_genomosp._1	1.60904	0.0296703	M1_G
Burkholderiales_bacterium_RIFCSPHIGHO2_12_FULL_65_48	1.60892	0.00907602	M1_G
Betaproteobacteria_bacterium_RBG_16_66_20	-1.60881	0.0010989	M1_G
Janthinobacterium_sp._HH104	1.60826	0.0296703	M1_N
Rhizobium_azooxidifex	1.60819	0.0197802	M1_N
Thermogemmatispora_argillosa	-1.60747	0.0043956	M1_N
Candidatus_Saccharibacteria_bacterium_RIFCSPLOWO2_01_FULL_49_22	1.60667	0.0447678	M1_G
Shewanella_baltica	1.60641	0.0128529	M1_N
Acidothermales_bacterium	-1.6064	0.0010989	M1_N
Streptococcus_agalactiae	-1.60613	0.0010989	M1_N
Planctomycetes_bacterium_Pla163	-1.60589	0.0010989	M1_N
Alicycliphilus_sp.	1.60533	0.0197802	M1_N
Alkalinema_sp._RU_4_3	1.60532	0.0197802	M1_G
Nonomuraea_solani	-1.60526	0.0043956	M1_G
Streptomyces_sp._NRRL_S-337	1.6039	0.01455	M1_N
Hortaea_werneckii	1.60367	0.0267349	M1_N
Lipomyces_starkeyi	1.60288	0.0312322	M1_G
Candidatus_Rokubacteria_bacterium_RIFCSPHIGHO2_02_FULL_69_13	-1.6023	0.00426035	M1_G
Bradyrhizobium_sp._LTSP885	1.60213	0.0131868	M1_N
Theionarchaea_archaeon_DG-70-1	1.60203	0.0267349	M1_N
Propionibacterium_sp._JV5	-1.60159	0.0010989	M1_N
Novosphingobium_sediminis	1.60084	0.0417582	M1_N
Burkholderiales_bacterium_28-67-8	1.6004	0.0417582	M1_N
Actinobacteria_bacterium_13_2_20CM_2_71_6	-1.60032	0.00426035	M1_N
Nanohaloarchaea_archaeon	1.60013	0.0446704	M1_N
Candidatus_Rokubacteria_bacterium_GWA2_73_35	-1.59983	0.00892378	M1_N
Candidatus_Rokubacteria_bacterium_13_1_20CM_4_70_13	-1.59958	0.012655	M1_N
Chlorobaculum_tepidum	-1.59888	0.0010989	M1_N
Micromonospora_sp._NBS_11-29	-1.59768	0.00632318	M1_N
Paraburkholderia_kururiensis	1.59674	0.0131868	M1_G
Humibacillus_xanthopallidus	-1.59648	0.0010989	M1_N
Acidobacteria_bacterium_13_1_20CM_2_55_15	-1.59606	0.004346	M1_N
Streptomyces_sp._SID9727	1.59558	0.0312322	M1_G
Pseudodesulfovibrio_hydrargyri	-1.59549	0.00426035	M1_G
Sphingomonadales_bacterium_RIFCSPLOWO2_12_FULL_63_15	1.59458	0.00769231	M1_N
Rhizobium_favelukesii	1.59384	0.0131868	M1_N
Acidobacteria_bacterium_13_1_40CM_3_65_5	-1.59359	0.0010989	M1_N
Spirochaetes_bacterium_GWD1_27_9	1.592	0.0446704	M1_N
Mesorhizobium_sp._M1A.F.Ca.ET.072.01.1.1	1.59142	0.0151809	M1_N
Rhizobium_sp._GV031	1.58989	0.0446704	M1_G
Nitrospira_sp._SCGC_AG-212-E16	-1.58827	0.0010989	M1_G
Frankia_sp._CpI1-P	-1.58817	0.0010989	M1_N
Desulfonauticus_sp._38_4375	-1.58781	0.0010989	M1_N
Pseudomonas_zhaodongensis	1.58723	0.0447678	M1_N
Deltaproteobacteria_bacterium_13_1_20CM_2_69_21	-1.58672	0.0021978	M1_N
Comamonas_sp._E6	1.58664	0.00907602	M1_G
Aspergillus_calidoustus	1.58603	0.0267349	M1_N
Brachybacterium_sp._SW0106-09	1.58593	0.00813374	M1_N
Brucella_abortus	1.58588	0.01455	M1_N
Thermoanaerobaculia_bacterium	-1.5849	0.0010989	M1_N
Chloroflexi_bacterium_13_1_40CM_4_65_16	-1.58456	0.00409199	M1_N
Ochrobactrum_sp._PW1	1.58424	0.0417582	M1_G
Gordonia_phage_Untouchable	1.58414	0.0446704	M1_N
Demequina_oxidasica	1.58384	0.00813374	M1_N
Nitrospira_moscoviensis	-1.58377	0.0010989	M1_G
Actinobacteria_bacterium_QS_8_72_14	-1.58329	0.0010989	M1_N
archaeon_HR04	-1.58321	0.00598116	M1_N
Sphingomonadales_bacterium_28-64-96	1.58312	0.0021978	M1_G
bacterium_HR32	-1.58217	0.012655	M1_N
Agreia_bicolorata	1.58213	0.0151809	M1_N
Vibrio_alginolyticus	1.58194	0.012655	M1_G
Ophiocordyceps_camponoti-leonardi_(nom._inval.)	1.58037	0.0446704	M1_N
Lawsonia_intracellularis	-1.58029	0.0010989	M1_G
Caulobacter_virus_CcrColossus	1.58023	0.0446704	M1_N
Deltaproteobacteria_bacterium_RIFCSPLOWO2_12_FULL_60_19	-1.58008	0.0010989	M1_G
Trichosporon_asahii	1.57986	0.0446704	M1_N
Cellulomonas_composti	1.57865	0.0296703	M1_G
Marinobacter_similis	1.57815	0.010301	M1_N
Burkholderia_virus_KL1	1.57741	0.0267349	M1_N
Actinobacteria_bacterium_13_1_20CM_3_68_10	-1.57735	0.0010989	M1_N
Ammoniphilus_sp._CFH_90114	-1.57733	0.0010989	M1_N
Massilia_mucilaginosa	1.5767	0.0296703	M1_N
Acidobacteria_bacterium_RIFCSPHIGHO2_02_FULL_67_57	-1.5762	0.00426035	M1_N
Asticcacaulis_sp._CF398	1.5748	0.0296703	M1_N
Paenarthrobacter_sp._MSM-2-10-13	1.57456	0.0447678	M1_G
Blastocatellia_bacterium_AA13	-1.5745	0.0010989	M1_N
Taiwanofungus_camphoratus	-1.5736	0.000530456	M1_G
Sanguibacter_keddieii	1.57342	0.0151809	M1_N
Sphingomonas_melonis	1.57269	0.0131868	M1_N
Bradyrhizobium_sp._WSM1417	1.57226	0.0296703	M1_N
Candidatus_Nitrosotenuis_chungbukensis	-1.57213	0.00769231	M1_N
Geopsychrobacter_electrodiphilus	1.57152	0.0417582	M1_G
Sulfuriferula_plumbiphila	-1.57074	0.0131868	M1_N
Streptomyces_sp._2231.1	1.57028	0.0152183	M1_G
Sphingobium_sp._RSMS	1.56994	0.0417582	M1_N
Ophiocordyceps_camponoti-rufipedis	1.56975	0.0151809	M1_N
Rhodococcus_sp._S2-17	-1.56956	0.00426035	M1_N
Candidatus_Nitrosotalea_devanaterra	-1.56956	0.0021978	M1_N
Streptosporangiales_bacterium	-1.56905	0.0010989	M1_N
Acidobacteria_bacterium_RIFCSPLOWO2_12_FULL_67_14	-1.56899	0.0010989	M1_N
Deltaproteobacteria_bacterium_GWD2_55_8	-1.56827	0.00409199	M1_G
Lasallia_pustulata	1.56784	0.0446704	M1_G
Pseudomonas_sp._EpS/L25	-1.56733	0.0010989	M1_G
Candidatus_Rokubacteria_bacterium_13_2_20CM_69_15_2	-1.56702	0.00620803	M1_N
Geobacter_uraniireducens	-1.56667	0.0010989	M1_N
Streptomyces_sp._MOE7	-1.56619	0.012655	M1_N
Methylobacterium_sp._Leaf399	1.56575	0.0417582	M1_N
uncultured_bacterium_5G4	-1.56523	0.0010989	M1_N
Haliscomenobacter_hydrossis	1.56506	0.0296703	M1_N
Timonella_senegalensis	1.56496	0.0267349	M1_N
Roseomonas_sp._AR75	-1.56472	0.0010989	M1_N
Microbacterium_sp._77mftsu3.1	1.56463	0.0267349	M1_G
Streptomyces_capuensis	1.56439	0.0267349	M1_N
Pyrinomonadaceae_bacterium	-1.56434	0.0010989	M1_N
uncultured_crenarchaeote_76h13	-1.56324	0.0332993	M1_N
Planctomycetes_bacterium_RBG_16_59_8	-1.5632	0.0131868	M1_N
Glaciecola_nitratireducens	1.56316	0.0446704	M1_N
Gemmatimonadetes_bacterium_13_1_40CM_3_70_8	-1.56275	0.00620803	M1_N
Acidobacteria_bacterium_RIFCSPLOWO2_12_FULL_59_11	-1.56271	0.0010989	M1_N
Xanthomonas_sp._NCPPB_1128	1.56238	0.0417582	M1_G
uncultured_Gemmatimonadetes_bacterium_Rifle_16ft_4_minimus_37772	-1.56224	0.00632318	M1_N
Syntrophobacterales_bacterium_CG03_land_8_20_14_0_80_58_14	-1.56206	0.0010989	M1_N
Curtobacterium_sp._Csp2	1.56177	0.0446704	M1_N
Burkholderiales_bacterium_68-12	1.56153	0.0197802	M1_N
bacterium_HR26	-1.56109	0.0010989	M1_N
Streptomyces_spongiicola	1.56093	0.0151809	M1_N
Nitrospira_lenta	-1.56084	0.0010989	M1_N
Frankia_coriariae	-1.56039	0.004346	M1_N
Domibacillus_robiginosus	-1.55985	0.00426035	M1_N
Cupriavidus_sp._SK-4	1.55968	0.0131868	M1_N
Sphingomonas_sp._R1S6C	1.55943	0.0131868	M1_N
Algoriella_xinjiangensis	-1.55943	0.0010989	M1_N
Candidatus_Bathyarchaeota_archaeon_RBG_13_38_9	-1.55905	0.0296703	M1_N
Mesorhizobium_huakuii	1.55872	0.0152183	M1_N
Sphingobium_sp._CAP-1	1.55853	0.0296703	M1_N
Terrabacter_sp._Root181	-1.55773	0.0010989	M1_N
Catenovulum_sp._RQJ05	1.55765	0.0378126	M1_N
Agrobacterium_rosae	1.55663	0.0447678	M1_N
Diaphorobacter_sp._J5-51	1.55606	0.0278744	M1_N
Mycolicibacterium_sp._NCC-Tsukiji	-1.55547	0.00426035	M1_N
Xanthomonas_sp._MUS_060	1.55513	0.0131868	M1_N
Acidobacteria_bacterium_13_1_40CM_3_56_11	-1.55499	0.0010989	M1_N
Dyadobacter_jejuensis	1.55303	0.0296703	M1_N
Pantoea_sp._SO10	1.55228	0.0446704	M1_N
Mesorhizobium_sp._M4A.F.Ca.ET.020.02.1.1	1.55207	0.0267349	M1_N
Geodermatophilus_sp._DF01_2	-1.55195	0.0010989	M1_N
Paracoccus_saliphilus	-1.55182	0.0010989	M1_N
Enterobacter_sp._FY-07	-1.55169	0.00409199	M1_G
Tuber_aestivum	-1.55118	0.00273589	M1_N
Cryptococcus_neoformans	1.55076	0.0446704	M1_N
Nocardia_sp._335427	1.55046	0.0463455	M1_N
Alphaproteobacteria_bacterium_BRH_c36	-1.55005	0.0010989	M1_N
Hymenobacter_gummosus	1.5494	0.0296703	M1_N
Acidobacteria_bacterium_RIFCSPLOWO2_12_FULL_68_19	-1.54914	0.0010989	M1_N
Trebonia_kvetii	-1.54912	0.0010989	M1_N
Nocardia_altamirensis	1.54906	0.0197802	M1_N
Asanoa_hainanensis	-1.54877	0.0010989	M1_N
Streptomyces_virus_Paradiddles	1.54868	0.0446704	M1_N
Gemmatimonadetes_bacterium_13_1_40CM_66_11	-1.54816	0.0043956	M1_N
Streptomyces_sp._Ag82_O1-9	-1.54806	0.00892378	M1_N
Pseudomonas_xinjiangensis	1.54758	0.0197802	M1_G
Taibaiella_koreensis	1.54713	0.0296703	M1_N
Blastomonas_sp._CCH1-A6	1.5469	0.0131868	M1_G
Streptomyces_sp._PIP175	1.54639	0.0446704	M1_N
Kangiella_sp._HD9-110m-PIT-SAG07	-1.54615	0.00409199	M1_N
Pedobacter_steynii	1.54512	0.0296703	M1_N
Actinomadura_sp._DSM_109109	-1.54499	0.0010989	M1_N
uncultured_bacterium_F39-01	-1.54474	0.00620803	M1_N
Arthrobacter_phage_Vibaki	1.54393	0.0446704	M1_G
Betaproteobacteria_bacterium_RIFCSPLOWO2_02_FULL_66_14	-1.54375	0.0010989	M1_G
Marinobacter_santoriniensis	1.54351	0.0446704	M1_N
Burkholderia_sp._BDU8	1.54337	0.0289309	M1_N
Marivita_cryptomonadis	1.54231	0.0446704	M1_N
Streptomyces_angustmyceticus	1.54189	0.0267349	M1_G
Streptomyces_sp._NRRL_S-337	1.54181	0.010301	M1_G
Symploca_sp._SIO1A3	-1.54159	0.0010989	M1_N
Cellulomonas_composti	1.54079	0.0296703	M1_N
Pseudooceanicola_sp._GBMRC_2024	1.54042	0.0312322	M1_N
Candidatus_Rokubacteria_bacterium_13_1_40CM_3_69_38	-1.54041	0.00620803	M1_N
Deltaproteobacteria_bacterium_13_1_40CM_4_54_4	-1.54012	0.00620803	M1_G
Gemmatimonadetes_bacterium_13_2_20CM_2_69_23	-1.53992	0.0010989	M1_G
Candidatus_Entotheonella_factor	-1.53983	0.0010989	M1_N
Corynebacterium_jeikeium	1.5398	0.010301	M1_N
Talaromyces_stipitatus	1.53979	0.0446704	M1_N
Psychroserpens_mesophilus	1.53943	0.00409199	M1_N
Lautropia_sp._SCN_70-15	-1.53912	0.0010989	M1_G
Stappia_taiwanensis	1.53901	0.00769231	M1_N
Comamonas_sp._JNW	1.53862	0.00907602	M1_G
Azoarcus_sp._SY39	1.53862	0.0131868	M1_N
Draconibacterium_orientale	-1.53811	0.0010989	M1_G
Williamsia_sterculiae	1.53758	0.0446704	M1_G
Brevundimonas_vesicularis	1.53742	0.0010989	M1_N
Arthrobacter_virus_Andrew	1.53693	0.0267349	M1_N
Sphingobium_baderi	1.53688	0.0417582	M1_G
Sphingomonas_aquatilis	1.53687	0.0244437	M1_G
Limnohabitans_sp._103DPR2	1.53623	0.0296703	M1_G
Candidatus_Methylomirabilis_limnetica	-1.53612	0.0010989	M1_N
Heliobacterium_modesticaldum	-1.53492	0.0010989	M1_N
Caedimonadaceae_bacterium	1.53465	0.0446704	M1_N
Acidobacteria_bacterium_RIFCSPLOWO2_12_FULL_60_22	-1.53428	0.0010989	M1_N
Comamonas_piscis	1.53323	0.00813374	M1_N
Arthrobacter_virus_Sonali	1.53266	0.0447678	M1_G
Solemya_velesiana_gill_symbiont	-1.53253	0.004346	M1_G
Candidatus_Rokubacteria_bacterium_13_1_20CM_4_70_14	-1.53167	0.00892378	M1_N
bacterium_BMS3Bbin02	-1.53149	0.0021978	M1_N
Bradyrhizobium_sp._SG09	-1.53122	0.00426035	M1_G
bacterium_M00.F.Ca.ET.162.01.1.1	1.53008	0.0296703	M1_G
Cryobacterium_sp._HLT2-28	-1.53003	0.0010989	M1_N
Nocardiopsis_lucentensis	1.53	0.0267349	M1_G
Amycolatopsis_eurytherma	-1.52987	0.00426035	M1_N
Paraburkholderia_sp._BL25I1N1	-1.52963	0.00769231	M1_G
Streptomyces_sp._NWU49	1.52961	0.0417582	M1_G
Oryzihumus_leptocrescens	-1.5293	0.0010989	M1_N
Sphingobium_herbicidovorans	1.52919	0.00769231	M1_N
Cellvibrionaceae_bacterium	1.5291	0.0197802	M1_N
Streptomyces_angustmyceticus	1.52908	0.0151809	M1_N
Mucilaginibacter_mallensis	1.52899	0.00769231	M1_N
Solirubrobacterales_bacterium_70-9	-1.52898	0.0010989	M1_N
Burkholderia_sp._Leaf177	1.52859	0.0463455	M1_N
Brevibacterium_sp.	1.52843	0.0151809	M1_N
Mycolicibacterium_rhodesiae	-1.52818	0.0010989	M1_G
Betaproteobacteria_bacterium_SG8_40	-1.52763	0.0010989	M1_N
Ferrimicrobium_acidiphilum	-1.52721	0.00892378	M1_N
Chloroflexus_sp._Y-396-1	-1.52609	0.0010989	M1_N
Frankia_sp._AvcI1	-1.52582	0.00620803	M1_N
Colletotrichum_sidae	1.52561	0.0446704	M1_N
Pseudoxanthomonas_koreensis	1.52542	0.0131868	M1_N
Flavobacterium_album	1.52481	0.010301	M1_N
Betaproteobacteria_bacterium_RIFCSPHIGHO2_12_FULL_69_13	-1.52481	0.0010989	M1_G
candidate_division_NC10_bacterium_CSP1-5	-1.52473	0.0010989	M1_N
Blastocatellia_bacterium	-1.52447	0.0010989	M1_N
Acidobacteria_bacterium_RIFCSPLOWO2_02_FULL_67_21	-1.52359	0.0010989	M1_N
Dyadobacter_jejuensis	1.52318	0.0296703	M1_G
Deltaproteobacteria_bacterium_RIFOXYA2_FULL_55_11	-1.52271	0.00426035	M1_G
Pseudomonas_sp._IzPS43_3003	-1.52199	0.0043956	M1_N
Acidimicrobium_ferrooxidans	-1.5218	0.0010989	M1_N
Acidobacteria_bacterium_13_1_40CM_2_64_6	-1.52172	0.0010989	M1_N
Desulfococcus_multivorans	-1.52167	0.0010989	M1_N
Mariniflexile_sp._TRM1-10	1.5215	0.0247613	M1_N
Nitrospira_sp._SG-bin1	-1.5214	0.0021978	M1_N
Ensifer_adhaerens	1.52123	0.0197802	M1_N
Bizionia_myxarmorum	-1.52105	0.0021978	M1_G
uncultured_bacterium_4050020-J15	-1.52062	0.0010989	M1_N
Westiellopsis_prolifica	-1.52019	0.00769231	M1_N
Arenibacter_algicola	1.51889	0.0289309	M1_N
Chromobacterium_sp._IIBBL_112-1	1.51811	0.0446704	M1_G
Comamonas_piscis	1.51779	0.00813374	M1_G
Massilia_sp._Root335	1.51755	0.0010989	M1_N
Sphingobium_amiense	1.517	0.0131868	M1_N
Janthinobacterium_sp._BJB401	1.51689	0.0463455	M1_N
Sphingomonas_sp._CCP-7	1.51684	0.0417582	M1_G
Pezoloma_ericae	1.51648	0.0267349	M1_N
Taiwanofungus_camphoratus	-1.51587	0.00233455	M1_N
Streptomyces_sp._AJS327	1.51533	0.0151809	M1_N
Planctomycetes_bacterium_GWA2_39_15	-1.51512	0.0128529	M1_N
Solirubrobacterales_bacterium	-1.51504	0.0010989	M1_N
Dactylella_cylindrospora	1.51488	0.0267349	M1_N
Acidobacteriia_bacterium	-1.51478	0.0010989	M1_N
Sphingomonas_sp._CCH5-D11	1.5121	0.0197802	M1_N
Polynucleobacter_victoriensis	1.51105	0.0417582	M1_N
Nitrosomonas_sp._APG5	1.51013	0.0131868	M1_N
Armatimonadetes_bacterium_CG2_30_59_28	-1.50994	0.0296703	M1_G
Ardenticatena_maritima	-1.50988	0.0010989	M1_N
Nitrincola_tapanii	1.50972	0.0296703	M1_N
Nitrospira_sp._CG24C	-1.50922	0.00769231	M1_N
Leptolyngbya_sp._BC1307	-1.50882	0.0010989	M1_N
Cellulomonas_sp._FA1	1.50881	0.0446704	M1_N
bacterium_BMS3Bbin03	-1.50868	0.00632318	M1_N
Betaproteobacteria_bacterium_RIFCSPLOWO2_12_FULL_64_23	-1.50861	0.0010989	M1_G
Gemmatimonadetes_bacterium_13_1_40CM_2_60_3	-1.50803	0.0021978	M1_N
Microbacterium_phage_Ashton	1.5078	0.0267349	M1_N
Methylobacterium_sp._Leaf399	1.50693	0.0131868	M1_G
Azoarcus_sp._CIB	1.50677	0.0131868	M1_N
Rhizobium_sp._NFR07	1.50672	0.0131868	M1_N
Defluviimonas_sp.	1.5061	0.0417582	M1_N
Xanthomonas_sp._LMG_8989	1.50533	0.01455	M1_N
Agromyces_salentinus	1.50433	0.0197802	M1_N
Chlamydia_trachomatis	-1.50407	0.0010989	M1_N
Cyanobacteria_bacterium_13_1_40CM_2_61_4	-1.50359	0.0010989	M1_N
Rhodobacter_sphaeroides	1.50301	0.0131868	M1_N
Salmonella_virus_FSL_SP-076	1.5029	0.0446704	M1_N
Streptomyces_sp._1114.5	-1.50273	0.00168764	M1_N
Agrobacterium_genomosp._5	1.5025	0.0446704	M1_N
Cyanobacteria_bacterium_RU_5_0	-1.50215	0.00426035	M1_N
[truncated: 1,897 more rows]

## Sheet: M6
Species	log2FoldChange	pValue	Group
Cellvibrio_sp._PSBB006	8.73449	0.0010989	M6_N
Cellvibrio_sp._PSBB006	7.8719	0.0010989	M6_G
Verrucomicrobiae_bacterium_DG1235	7.53948	0.0010989	M6_N
Verrucomicrobiae_bacterium_DG1235	6.93412	0.0021978	M6_G
Candidatus_Doudnabacteria_bacterium_RIFCSPHIGHO2_02_FULL_46_11	6.854	0.0447678	M6_G
Chloroflexi_bacterium_OLB13	6.78061	0.0131868	M6_G
Candidatus_Adlerbacteria_bacterium_RIFCSPLOWO2_01_FULL_51_16	6.68593	0.0296703	M6_G
Candidatus_Doudnabacteria_bacterium_RIFCSPHIGHO2_02_FULL_46_11	6.68478	0.0336911	M6_N
Candidatus_Adlerbacteria_bacterium_RIFCSPLOWO2_01_FULL_51_16	6.59281	0.0010989	M6_N
Anaerolineae_bacterium_UTCFX5	6.54799	0.00907602	M6_G
Opitutales_bacterium_TMED158	6.52187	0.0010989	M6_N
Candidatus_Rhabdochlamydia_sp._T3358	6.46778	0.00620803	M6_G
Pelagicoccus_albus	6.36326	0.0010989	M6_N
Candidatus_Magasanikbacteria_bacterium_CG_4_10_14_0_2_um_filter_41_10	-6.25225	0.004346	M6_G
Ignavibacteriales_bacterium_UTCHB1	6.23894	0.00632318	M6_G
Candidatus_Adlerbacteria_bacterium_RIFCSPHIGHO2_12_FULL_53_18	6.21885	0.0010989	M6_N
Chlamydiae_bacterium_CG10_big_fil_rev_8_21_14_0_10_42_34	6.19117	0.00892378	M6_G
Candidatus_Rhabdochlamydia_sp._T3358	6.18288	0.00426035	M6_N
Candidatus_Kaiserbacteria_bacterium	6.08102	0.0010989	M6_N
Saccharophagus_degradans	6.00369	0.0010989	M6_N
Chloroflexi_bacterium_OLB13	5.96732	0.0010989	M6_N
Chloroflexi_bacterium_OLB15	5.93602	0.0010989	M6_G
Candidatus_Dojkabacteria_bacterium	5.9341	0.0010989	M6_N
Opitutales_bacterium_TMED158	5.93182	0.0010989	M6_G
Parcubacteria_bacterium_C7867-004	5.9218	0.0010989	M6_N
Candidatus_Kaiserbacteria_bacterium	5.90107	0.00769231	M6_G
Candidatus_Magasanikbacteria_bacterium_CG_4_10_14_0_2_um_filter_41_10	-5.89262	0.0010989	M6_N
Saccharophagus_degradans	5.88207	0.0010989	M6_G
Thelephora_ganbajun	-5.85038	0.00105795	M6_N
Thelephora_ganbajun	-5.84245	0.00105795	M6_G
Alteromonadaceae_bacterium_2052S.S.stab0a.01	5.79924	0.0010989	M6_N
Chitinophagaceae_bacterium_IBVUCB1	5.76571	0.0010989	M6_N
Candidatus_Adlerbacteria_bacterium_RIFCSPHIGHO2_12_FULL_53_18	5.76116	0.0197802	M6_G
Chlorobi_bacterium_OLB5	5.75114	0.00409199	M6_G
Pelagicoccus_albus	5.74898	0.00769231	M6_G
Anaerolineae_bacterium_UTCFX5	5.73309	0.004346	M6_N
Chitinophagaceae_bacterium_IBVUCB1	5.66733	0.00769231	M6_G
Alteromonadaceae_bacterium_2052S.S.stab0a.01	5.6389	0.0010989	M6_G
Bacteroidetes_bacterium_43-93	5.63201	0.0010989	M6_G
Bacteroidetes_bacterium_43-93	5.56793	0.0010989	M6_N
Candidatus_Woesebacteria_bacterium_RIFCSPLOWO2_01_FULL_44_24b	5.52413	0.00409199	M6_N
Candidatus_Andersenbacteria_bacterium_RIFCSPHIGHO2_12_FULL_45_11	5.51562	0.00409199	M6_N
Cellvibrionaceae_bacterium_Bs12	5.5077	0.0010989	M6_G
Cellvibrionaceae_bacterium_Bs12	5.46964	0.0010989	M6_N
Phycisphaera_sp.	5.4521	0.0010989	M6_N
Maricaulis_salignorans	5.42677	0.0010989	M6_N
Tranquillimonas_alkanivorans	5.36105	0.0010989	M6_N
Ignavibacteriales_bacterium_UTCHB1	5.35916	0.00632318	M6_N
Chloroflexi_bacterium_OLB15	5.35879	0.0010989	M6_N
Planctomycetes_bacterium_KS4	5.3285	0.0010989	M6_N
candidate_division_WWE3_bacterium_RIFCSPHIGHO2_01_FULL_42_13	5.29914	0.00409199	M6_N
Cellvibrionaceae_bacterium_AOL6	5.24544	0.0010989	M6_N
Candidatus_Kaiserbacteria_bacterium_CG10_big_fil_rev_8_21_14_0_10_44_10	5.24059	0.004346	M6_N
Fertoebacter_nigrum	5.22555	0.0010989	M6_N
Candidatus_Saccharibacteria_bacterium_RIFCSPHIGHO2_02_FULL_47_12	5.21097	0.0021978	M6_G
Parcubacteria_bacterium_C7867-004	5.19635	0.0021978	M6_G
Tranquillimonas_alkanivorans	5.18611	0.00769231	M6_G
Cellvibrionaceae_bacterium_AOL6	5.15706	0.0010989	M6_G
Maricaulis_maris	5.13944	0.0010989	M6_N
Candidatus_Levybacteria_bacterium_RIFCSPLOWO2_12_FULL_37_14	5.11889	0.00409199	M6_G
Parcubacteria_group_bacterium_Gr01-1014_56	5.11229	0.0010989	M6_N
Maricaulis_sp._W15	5.08422	0.0010989	M6_N
Chlamydiae_bacterium	5.05521	0.0021978	M6_G
Candidatus_Adlerbacteria_bacterium_RIFCSPHIGHO2_02_FULL_52_17	5.05416	0.00769231	M6_G
Candidatus_Saccharibacteria_bacterium_RIFCSPHIGHO2_02_FULL_47_12	5.0479	0.0010989	M6_N
Parcubacteria_bacterium_C7867-007	5.01357	0.0010989	M6_N
Rhodobacteraceae_bacterium_CCMM004	5.01103	0.004346	M6_N
Oceanicaulis_sp._HLUCCA04	5.00906	0.0010989	M6_N
Candidatus_Adlerbacteria_bacterium_RIFCSPHIGHO2_02_FULL_52_17	5.00046	0.0010989	M6_N

## Sheet: M9
Species	log2FoldChange	pValue	Group
Saccharophagus_degradans	8.831	0.0010989	M9_N
Alteromonadaceae_bacterium_2052S.S.stab0a.01	8.65123	0.0010989	M9_N
Cellvibrionaceae_bacterium_Bs12	8.47008	0.0010989	M9_N
Cellvibrio_sp._PSBB006	8.10667	0.0010989	M9_N
Cellvibrionaceae_bacterium_AOL6	7.92309	0.0010989	M9_N
Agarilytica_rhodophyticola	7.62755	0.0021978	M9_N
Teredinibacter_sp._Bs08	7.48427	0.0010989	M9_N
Alteromonadaceae_bacterium_2753L.S.0a.02	7.38096	0.0010989	M9_N
Marinimicrobium_agarilyticum	7.1676	0.0021978	M9_N
Teredinibacter_turnerae	7.05869	0.0010989	M9_N
Thalassocella_blandensis	7.00633	0.0010989	M9_N
Teredinibacter_franksiae	6.93805	0.0010989	M9_N
Marinimicrobium_sp._SW121	6.85425	0.0010989	M9_N
Gilvimarinus_chinensis	6.84669	0.0010989	M9_N
Candidatus_Magasanikbacteria_bacterium_CG_4_10_14_0_2_um_filter_41_10	-6.64609	0.00168764	M9_G
Saccharophagus_degradans	6.62607	0.0010989	M9_G
Candidatus_Magasanikbacteria_bacterium_CG_4_10_14_0_2_um_filter_41_10	-6.57971	0.00382007	M9_N
Gilvimarinus_agarilyticus	6.56352	0.00769231	M9_N
Alteromonadaceae_bacterium_2052S.S.stab0a.01	6.50114	0.0010989	M9_G
Marinagarivorans_algicola	6.44748	0.0021978	M9_N
Cellvibrionaceae_bacterium_1162T.S.0a.05	6.38105	0.0010989	M9_N
Cellvibrio_sp._pealriver	6.30006	0.0010989	M9_N
Cellvibrio_japonicus	6.25674	0.0010989	M9_N
Aestuariicella_hydrocarbonica	6.21826	0.0021978	M9_N
Mucilaginibacter_auburnensis	6.18254	0.0131868	M9_N
Cellvibrionaceae_bacterium_Bs12	6.12935	0.0010989	M9_G
Moraxellaceae_bacterium	6.0253	0.0010989	M9_N
Gilvimarinus_polysaccharolyticus	5.95897	0.00769231	M9_N
Cellvibrio_sp._KY-GH-1	5.94281	0.0010989	M9_N
Marinimicrobium_koreense	5.86863	0.0021978	M9_N
Cellvibrio_sp._PSBB006	5.85781	0.0010989	M9_G
Thelephora_ganbajun	-5.82388	0.00168764	M9_N
Cellvibrionaceae_bacterium_AOL6	5.7529	0.0010989	M9_G
Cellvibrio_sp._79	5.68739	0.0010989	M9_N
Alteromonadaceae_bacterium_Bs31	5.64508	0.0010989	M9_N
Diaphorobacter_polyhydroxybutyrativorans	5.58608	0.00426035	M9_N
Thelephora_ganbajun	-5.4665	0.00343249	M9_G
Teredinibacter_sp._Bs08	5.40805	0.0010989	M9_G
Agarilytica_rhodophyticola	5.36816	0.0010989	M9_G
Pseudomaricurvus_alkylphenolicus	5.36492	0.0043956	M9_N
Pseudomaricurvus_sp._HS19	5.35901	0.0010989	M9_N
Marinimicrobium_sp._LS-A18	5.29772	0.0010989	M9_N
Alteromonadaceae_bacterium_2753L.S.0a.02	5.276	0.0010989	M9_G
Cellvibrio_sp._BR	5.26973	0.00769231	M9_N
Cellvibrio_mixtus	5.1629	0.0010989	M9_N
Agaribacterium_haliotis	5.13833	0.0010989	M9_N
Cellvibrio_sp._OA-2007	5.10162	0.0131868	M9_N
Saccharospirillaceae_bacterium	5.09666	0.00632318	M9_N
Proteobacteria_bacterium_228	5.08336	0.0010989	M9_N
Microbulbifer_pacificus	5.08327	0.0010989	M9_N
Microbacterium_phage_Araxxi	5.051	0.0010989	M9_N
Sorangiineae_bacterium_NIC37A_2	5.03185	0.0010989	M9_N
Cellvibrio_sp._KY-YJ-3	5.01466	0.0043956	M9_N
Deltaproteobacteria_bacterium_ADurb.Bin207	5.00908	0.0010989	M9_N
